# Supplementary material
Source: publisher figshare collection journal article supplement (https://gsajournals.figshare.com/ndownloader/files/29157456)
Supplement: Supplementary file 1 [file 29157456]

Table S1. Comprehensive CC Colony Breeding Records from The Jackson Laboratory Repository,,,,,,,,,,,,,,,,,,,,,,,,,,,,
Strain_Number,Strain ,Cross,Mating_Pair,Mating_Trio,Mating_Harem,Dam_DOB,Sire_DOB,Mated ,Litter1_DOB,Litter_Number,DamAgeAtBirth_Litter1,SireAgeAtBirth_Litter1,Litter2_DOB,Litter3_DOB,Age_at_First_Litter,interbirth_Interval,Litter_Size,Date_Weaned,Weaned_F,Weaned_M,# inferred dead male,# inferred dead female,n_Weaned_Total,n_inferred_dead ,n_Litters_born,n_litters_weaned,Notes,
21238,CC001,01x02,1,0,0,5/31/16,5/31/16,7/7/16,8/7/16,1,68,68,,,68,NA,7,8/31/16,4,1,2,2 escaped,5,2,1,1,2 escaped,
21238,CC001,01x02,1,0,0,5/31/16,5/31/16,7/7/16,10/8/16,2,130,130,,,NA,62,7,11/10/16,3,3,1,1 missing,6,1,1,1,1 missing,
21238,CC001,01x02,1,0,0,5/31/16,5/31/16,7/7/16,11/27/16,3,180,180,,,NA,50,7,12/21/16,5,0,2,1 FD,5,2,1,1,1 FD,
21238,CC001,01x02,1,0,0,5/31/16,5/31/16,7/7/16,12/31/16,4,214,214,,,NA,34,5,2/2/17,3,1,1,,4,1,1,1,,
21238,CC001,01x02,1,0,0,5/31/16,5/31/16,7/7/16,2/1/17,5,246,246,,,NA,32,5,3/3/17,2,3,0,01 FD 4/25/17,5,0,1,1,01 FD 4/25/16,
21238,CC001,"08,09x10",0,1,0,10/8/16,10/8/16,11/10/16,1/21/17,1,105,105,1/24/17,,105,NA,10,2/16/17,3,5,NA,NA,8,2,2,2,,
21238,CC001,"08,09x10",0,1,0,10/8/16,10/8/16,11/10/16,2/15/17,2,130,130,,,NA,NA,2,NA,NA,NA,NA,NA,NA,NA,1,0,,
21238,CC001,"08,09x10",0,1,0,10/8/16,10/8/16,11/10/16,3/25/17,3,168,168,,,NA,NA,3,4/19/17,0,3,0,0,3,0,1,1,,
21238,CC001,"08,09x10",0,1,0,10/8/16,10/8/16,11/10/16,4/6/17,4,180,180,,,NA,NA,5,4/27/17,1,4,0,0,5,0,1,1,,
21238,CC001,"08,09x10",0,1,0,10/8/16,10/8/16,11/10/16,4/23/17,5,197,197,,,NA,NA,4,5/15/17,4,0,0,0,4,0,1,1,,
21238,CC001,"08,09x10",0,1,0,10/8/16,10/8/16,11/10/16,4/30/17,6,204,204,,,NA,NA,4,5/23/17,1,3,0,0,4,0,1,1,,
21238,CC001,"08,09x10",0,1,0,10/8/16,10/8/16,11/10/16,5/24/17,7,228,228,,,NA,NA,6,6/19/17,3,3,0,0,6,0,1,1,,
21238,CC001,"101,102x103",0,1,0,2/27/18,2/27/18,4/2/18,NA,1,NA,NA,,,NA,NA,0,NA,0,0,0,,0,0,1,0,,
21238,CC001,11x12,1,0,0,10/8/16,10/8/16,11/10/16,2/11/17,1,126,126,,,126,NA,7,3/8/17,3,4,0,0,7,0,1,1,,
21238,CC001,11x12,1,0,0,10/8/16,10/8/16,11/10/16,3/6/17,2,149,149,,,NA,23,8,4/5/17,3,3,1,NA,6,2,1,1,,
21238,CC001,11x12,1,0,0,10/8/16,10/8/16,11/10/16,4/6/17,3,180,180,,,NA,31,5,4/27/17,2,3,0,0,5,0,1,1,,
21238,CC001,11x12,1,0,0,10/8/16,10/8/16,11/10/16,5/3/17,4,207,207,,,NA,27,9,5/23/17,1,8,0,0,9,0,1,1,,
21238,CC001,11x12,1,0,0,10/8/16,10/8/16,11/10/16,5/29/17,5,233,233,,,NA,26,6,6/19/17,2,4,0,0,6,0,1,1,,
21238,CC001,11x12,1,0,0,10/8/16,10/8/16,11/10/16,6/25/17,6,260,260,,,NA,27,5,7/17/17,2,3,0,0,5,0,1,1,,
21238,CC001,"13,14x15",0,1,0,12/31/16,12/31/16,2/2/17,3/11/17,1,70,70,,,70,NA,7,4/5/17,5,1,1,1 missing,6,1,1,1,1 missing,
21238,CC001,"13,14x15",0,1,0,12/31/16,12/31/16,2/2/17,3/26/17,2,85,85,,,NA,NA,2,NA,0,0,2,2 FD,0,2,1,0,2 FD,
21238,CC001,"13,14x15",0,1,0,12/31/16,12/31/16,2/2/17,4/21/17,3,111,111,,,NA,NA,8,5/12/17,4,4,0,,8,0,1,1,,
21238,CC001,"13,14x15",0,1,0,12/31/16,12/31/16,2/2/17,4/23/17,4,113,113,,,NA,NA,5,5/15/17,0,4,1,,4,1,1,1,,
21238,CC001,"13,14x15",0,1,0,12/31/16,12/31/16,2/2/17,5/15/17,5,135,135,,,NA,NA,6,6/12/17,5,1,0,,6,0,1,1,,
21238,CC001,"13,14x15",0,1,0,12/31/16,12/31/16,2/2/17,6/7/17,6,158,158,,,NA,NA,9,6/26/17,6,3,0,,9,0,1,1,,
21238,CC001,"13,14x15",0,1,0,12/31/16,12/31/16,2/2/17,7/1/17,7,182,182,,,NA,NA,6,7/31/17,2,3,1,1 FD,5,1,1,1,1 FD,
21238,CC001,"13,14x15",0,1,0,12/31/16,12/31/16,2/2/17,8/18/17,8,230,230,,,NA,NA,5,9/18/17,4,1,0,,5,0,1,1,,
21238,CC001,"13,14x15",0,1,0,12/31/16,12/31/16,2/2/17,8/26/17,9,238,238,,,NA,NA,5,NA,0,0,5,,0,5,1,0,,
21238,CC001,"16,17x18",0,1,0,1/22/17,1/22/17,2/16/17,4/30/17,1,98,98,,,98,NA,7,5/23/17,2,3,2,2 FD,5,2,1,1,2 FD,
21238,CC001,"16,17x18",0,1,0,1/22/17,1/22/17,2/16/17,5/6/17,2,104,104,,,NA,NA,5,5/31/17,1,3,1,,4,1,1,1,,
21238,CC001,"16,17x18",0,1,0,1/22/17,1/22/17,2/16/17,5/26/17,3,124,124,,,NA,NA,8,6/19/17,3,3,2,1 missing,6,2,1,1,1 missing,
21238,CC001,"16,17x18",0,1,0,1/22/17,1/22/17,2/16/17,6/17/17,4,146,146,,,NA,NA,6,7/14/17,2,4,0,,6,0,1,1,,
21238,CC001,"16,17x18",0,1,0,1/22/17,1/22/17,2/16/17,7/19/17,5,178,178,,,NA,NA,9,8/14/17,4,5,0,,9,0,1,1,,
21238,CC001,19x20,1,0,0,1/22/17,1/22/17,2/16/17,7/16/17,1,175,175,,,175,NA,3,8/14/17,2,1,0,,3,0,1,1,,
21238,CC001,"21,22x23",0,1,0,2/1/17,2/1/17,3/3/17,4/28/17,1,86,86,4/30/17,,86,NA,11,5/23/17,4,6,1,,10,1,2,2,,
21238,CC001,"21,22x23",0,1,0,2/1/17,2/1/17,3/3/17,5/21/17,2,109,109,,,NA,NA,7,6/12/17,6,0,1,1 missing,6,1,1,1,1 missing,
21238,CC001,"21,22x23",0,1,0,2/1/17,2/1/17,3/3/17,6/15/17,3,134,134,,,NA,NA,8,7/14/17,5,1,2,2 FD,6,2,1,1,2 FD,
21238,CC001,"21,22x23",0,1,0,2/1/17,2/1/17,3/3/17,7/8/17,4,157,157,7/10/17,,NA,NA,9,7/31/17,4,4,1,,8,1,2,2,,
21238,CC001,"21,22x23",0,1,0,2/1/17,2/1/17,3/3/17,7/30/17,5,179,179,,,NA,NA,4,NA,0,0,4,missing,0,4,1,0,missing,
21238,CC001,"21,22x23",0,1,0,2/1/17,2/1/17,3/3/17,8/28/17,6,208,208,9/1/17,,NA,NA,16,9/18/17,4,8,4,4 missing,12,4,2,2,4 missing,
21238,CC001,"24,25x26",0,1,0,2/11/17,2/11/17,3/8/17,5/21/17,1,99,99,,,99,NA,3,6/12/17,0,3,0,,3,0,1,1,,
21238,CC001,"24,25x26",0,1,0,2/11/17,2/11/17,3/8/17,6/23/17,2,132,132,,,NA,NA,9,7/14/17,5,4,0,,9,0,1,1,,
21238,CC001,"24,25x26",0,1,0,2/11/17,2/11/17,3/8/17,8/6/17,3,176,176,,,NA,NA,16,8/28/17,5,7,4,4 PW,12,4,1,1,4 PW,
21238,CC001,27x28,1,0,0,2/11/17,2/11/17,3/8/17,4/30/17,1,78,78,,,78,NA,7,5/23/17,3,4,0,,7,0,1,1,,
21238,CC001,"29,30x31",0,1,0,3/6/17,3/6/17,4/5/17,5/22/17,1,77,77,,,77,NA,6,6/12/17,2,4,,,6,0,1,1,,
21238,CC001,"29,30x31",0,1,0,3/6/17,3/6/17,4/5/17,6/10/17,2,96,96,,,NA,NA,7,7/3/17,2,4,,,6,1,1,1,,
21238,CC001,"29,30x31",0,1,0,3/6/17,3/6/17,4/5/17,7/1/17,3,117,117,,,NA,NA,5,7/31/17,1,4,,,5,0,1,1,,
21238,CC001,"29,30x31",0,1,0,3/6/17,3/6/17,4/5/17,8/9/17,4,156,156,,,NA,NA,7,8/28/17,3,4,,,7,0,1,1,,
21238,CC001,"29,30x31",0,1,0,3/6/17,3/6/17,4/5/17,10/9/17,5,217,217,,,NA,NA,7,10/31/17,3,4,,,7,0,1,1,,
21238,CC001,"312,313x314",0,1,0,6/28/16,6/28/16,8/8/16,9/3/16,1,67,67,,,67,NA,3,9/26/16,0,1,,,1,2,1,1,missing,
21238,CC001,"312,313x314",0,1,0,6/28/16,6/28/16,8/8/16,9/11/16,2,75,75,,,NA,NA,4,10/3/16,1,1,,,2,2,1,1,missing,
21238,CC001,"312,313x314",0,1,0,6/28/16,6/28/16,8/8/16,10/20/16,3,114,114,,,NA,NA,6,11/9/16,2,3,,,5,1,1,1,,
21238,CC001,"312,313x314",0,1,0,6/28/16,6/28/16,8/8/16,10/26/16,4,120,120,,,NA,NA,2,11/14/16,0,1,,,1,1,1,1,,
21238,CC001,"312,313x314",0,1,0,6/28/16,6/28/16,8/8/16,12/18/16,5,173,173,,,NA,NA,6,1/9/17,5,1,,,6,0,1,1,,
21238,CC001,"321,322x323",0,1,0,7/26/16,7/26/16,9/6/16,10/4/16,1,70,70,,,70,NA,6,10/31/16,4,2,0,,6,0,1,1,,
21238,CC001,"321,322x323",0,1,0,7/26/16,7/26/16,9/6/16,10/13/16,2,79,79,,,NA,NA,6,11/9/16,2,4,0,,6,0,1,1,,
21238,CC001,"321,322x323",0,1,0,7/26/16,7/26/16,9/6/16,11/3/16,3,100,100,,,NA,NA,4,11/29/16,0,2,2,2 missing,2,2,1,1,2 missing,
21238,CC001,"321,322x323",0,1,0,7/26/16,7/26/16,9/6/16,11/14/16,4,111,111,,,NA,NA,9,12/12/16,3,4,2,,7,2,1,1,,
21238,CC001,"321,322x323",0,1,0,7/26/16,7/26/16,9/6/16,12/24/16,5,151,151,,,NA,NA,5,1/16/17,0,2,3,1 FD; 2 missing,2,3,1,1,1 FD; 2 missing,
21238,CC001,"321,322x323",0,1,0,7/26/16,7/26/16,9/6/16,1/3/17,6,161,161,,,NA,NA,7,1/23/17,3,3,1,,6,1,1,1,,
21238,CC001,"327,328x329",0,1,0,8/6/16,8/6/16,9/12/16,10/24/16,1,79,79,10/27/16,,79,NA,11,11/14/16,6,3,2,,9,2,2,2,,
21238,CC001,"327,328x329",0,1,0,8/6/16,8/6/16,9/12/16,11/15/16,2,101,101,,,NA,NA,7,NA,0,0,7,"3 BD, 4 missing",0,7,1,0,"3 BD, 4 missing",
21238,CC001,"327,328x329",0,1,0,8/6/16,8/6/16,9/12/16,11/19/16,3,105,105,,,NA,NA,5,12/12/16,3,1,1,1 missing,4,1,1,1,1 missing,
21238,CC001,"327,328x329",0,1,0,8/6/16,8/6/16,9/12/16,12/14/16,4,130,130,,,NA,NA,4,1/9/17,2,1,1,1 missing,3,1,1,1,1 missing,
21238,CC001,"327,328x329",0,1,0,8/6/16,8/6/16,9/12/16,1/10/17,5,157,157,,,NA,NA,4,2/20/17,2,0,2,2 missing,2,2,1,1,2 missing,
21238,CC001,"327,328x329",0,1,0,8/6/16,8/6/16,9/12/16,1/29/17,6,176,176,,,NA,NA,2,2/27/17,1,1,0,,2,0,1,1,,
21238,CC001,32x33,1,0,0,3/6/17,3/6/17,4/5/17,5/28/17,1,83,83,,,83,NA,5,6/19/17,1,4,0,,5,0,1,1,,
21238,CC001,32x33,1,0,0,3/6/17,3/6/17,4/5/17,6/21/17,2,107,107,,,NA,24,7,7/14/17,2,5,0,,7,0,1,1,,
21238,CC001,32x33,1,0,0,3/6/17,3/6/17,4/5/17,7/15/17,3,131,131,,,NA,24,8,8/14/17,2,6,0,,8,0,1,1,,
21238,CC001,"330,331x332",0,1,0,8/30/16,8/30/16,10/3/16,11/19/16,1,81,81,,,81,NA,7,12/12/16,4,2,1,,6,1,1,1,,
21238,CC001,"330,331x332",0,1,0,8/30/16,8/30/16,10/3/16,12/11/16,2,103,103,,,NA,NA,4,1/9/17,2,1,1,,3,1,1,1,,
21238,CC001,"330,331x332",0,1,0,8/30/16,8/30/16,10/3/16,1/3/17,3,126,126,,,NA,NA,5,1/23/17,1,3,1,1 missing,4,1,1,1,1 missing,
21238,CC001,"330,331x332",0,1,0,8/30/16,8/30/16,10/3/16,1/24/17,4,147,147,,,NA,NA,9,2/20/17,2,2,5,"3 FD, 1 missing",4,5,1,1,"3 FD, 1 missing",
21238,CC001,"330,331x332",0,1,0,8/30/16,8/30/16,10/3/16,2/14/17,5,168,168,,,NA,NA,5,3/6/17,0,3,2,1 FD; 1 missing,3,2,1,1,1 FD; 1 missing,
21238,CC001,"330,331x332",0,1,0,8/30/16,8/30/16,10/3/16,3/9/17,6,191,191,,,NA,NA,7,NA,0,0,7,no info on cage card,0,7,1,0,no info on cage card,
21238,CC001,"330,331x332",0,1,0,12/17/16,12/17/16,1/9/17,2/19/17,7,64,64,2/23/17,,NA,NA,9,3/17/17,4,5,0,,9,0,2,2,,
21238,CC001,"330,331x332",0,1,0,12/17/16,12/17/16,1/9/17,3/17/17,8,90,90,,,NA,NA,6,4/19/17,2,4,0,0,6,0,1,1,,
21238,CC001,"330,331x332",0,1,0,12/17/16,12/17/16,1/9/17,4/3/17,9,107,107,,,NA,NA,8,4/28/17,0,8,0,0,8,0,1,1,,
21238,CC001,"330,331x332",0,1,0,12/17/16,12/17/16,1/9/17,4/30/17,10,134,134,,,NA,NA,7,5/22/17,1,3,NA,NA,4,3,1,1,"3 found dead, 1 is male",
21238,CC001,"330,331x332",0,1,0,12/17/16,12/17/16,1/9/17,5/22/17,11,156,156,,,NA,NA,6,6/12/17,3,3,0,0,6,0,1,1,,
21238,CC001,"330,331x332",0,1,0,12/17/16,12/17/16,1/9/17,6/28/17,12,193,193,,,NA,NA,6,7/24/17,4,2,0,0,6,0,1,1,,
21238,CC001,"330,331x332",0,1,0,12/17/16,12/17/16,1/9/17,7/10/17,13,205,205,,,NA,NA,2,NA,NA,NA,NA,NA,NA,NA,1,0,,
21238,CC001,"333,334x35",0,1,0,8/30/16,8/30/16,10/3/16,11/7/16,1,69,69,,,69,NA,10,11/29/16,3,5,2,,8,2,1,1,,
21238,CC001,"333,334x35",0,1,0,8/30/16,8/30/16,10/3/16,11/29/16,2,91,91,,,NA,NA,5,12/27/16,2,3,0,,5,0,1,1,,
21238,CC001,"333,334x35",0,1,0,8/30/16,8/30/16,10/3/16,12/18/16,3,110,110,,,NA,NA,5,1/9/17,0,5,0,,5,0,1,1,,
21238,CC001,"333,334x35",0,1,0,8/30/16,8/30/16,10/3/16,1/12/17,4,135,135,1/26/17,,NA,NA,10,2/20/17,4,6,0,,10,0,2,2,,
21238,CC001,"333,334x35",0,1,0,8/30/16,8/30/16,10/3/16,2/24/17,5,178,178,,,NA,NA,4,3/13/17,0,3,1,1 missing,3,1,1,1,1 missing,
21238,CC001,"333,334x35",0,1,0,8/30/16,8/30/16,10/3/16,2/27/17,6,181,181,,,NA,NA,5,NA,0,0,5,2 missing,0,5,1,0,2 missing,
21238,CC001,"336,337x338",0,1,0,8/30/16,8/30/16,10/3/16,10/31/16,1,62,62,,,62,NA,6,11/22/16,2,3,,,5,1,1,1,,
21238,CC001,"336,337x338",0,1,0,8/30/16,8/30/16,10/3/16,11/9/16,2,71,71,,,NA,NA,6,12/5/16,1,5,,,6,0,1,1,,
21238,CC001,"336,337x338",0,1,0,8/30/16,8/30/16,10/3/16,1/3/17,3,126,126,,,NA,NA,11,1/23/17,6,5,,,11,0,1,1,,
21238,CC001,"336,337x338",0,1,0,8/30/16,8/30/16,10/3/16,1/23/17,4,146,146,,,NA,NA,9,2/20/17,3,4,,,7,2,1,1,,
21238,CC001,"336,337x338",0,1,0,8/30/16,8/30/16,10/3/16,2/1/17,5,155,155,,,NA,NA,1,NA,0,0,,,0,1,1,0,,
21238,CC001,"336,337x338",0,1,0,8/30/16,8/30/16,10/3/16,2/28/17,6,182,182,,,NA,NA,6,NA,0,0,,,0,6,1,0,1 FD; 5 missing,
21238,CC001,"339,340,341x342",0,0,1,9/20/16,9/20/16,10/17/16,11/27/16,1,68,68,12/2/16,,68,NA,12,12/27/16,4,5,3,,9,3,2,2,,
21238,CC001,"339,340,341x342",0,0,1,9/20/16,9/20/16,10/17/16,12/25/16,2,96,96,,,NA,NA,10,1/16/17,5,4,1,,9,1,1,1,,
21238,CC001,"339,340,341x342",0,0,1,9/20/16,9/20/16,10/17/16,12/31/16,3,102,102,,,NA,NA,5,1/23/17,2,3,0,,5,0,1,1,,
21238,CC001,"339,340,341x342",0,0,1,9/20/16,9/20/16,10/17/16,1/25/17,4,127,127,,,NA,NA,4,2/20/17,3,1,0,,4,0,1,1,,
21238,CC001,"339,340,341x342",0,0,1,9/20/16,9/20/16,10/17/16,2/5/17,5,138,138,,,NA,NA,5,2/27/17,1,4,0,,5,0,1,1,,
21238,CC001,"339,340,341x342",0,0,1,9/20/16,9/20/16,10/17/16,2/28/17,6,161,161,,,NA,NA,1,NA,0,0,1,missing,0,1,1,0,missing,
21238,CC001,"339,340,341x342",0,0,1,9/20/16,9/20/16,10/17/16,3/21/17,7,182,182,,,NA,NA,9,4/10/17,4,5,0,,9,0,1,1,,
21238,CC001,"339,340,341x342",0,0,1,9/20/16,9/20/16,10/17/16,3/27/17,8,188,188,,,NA,NA,8,4/10/17,4,3,1,1 missing; RB 3/20/17,7,1,1,1,1 missing; RB 3/20/17,
21238,CC001,"34,35x36",0,1,0,3/11/17,3/11/17,4/5/17,6/15/17,1,96,96,,,96,NA,6,7/14/17,4,2,,,6,0,1,1,,
21238,CC001,"34,35x36",0,1,0,3/11/17,3/11/17,4/5/17,7/29/17,2,140,140,,,NA,NA,10,8/21/17,4,5,,,9,1,1,1,,
21238,CC001,"34,35x36",0,1,0,3/11/17,3/11/17,4/5/17,8/23/17,3,165,165,,,NA,NA,9,9/18/17,5,4,,,9,0,1,1,,
21238,CC001,"34,35x36",0,1,0,3/11/17,3/11/17,4/5/17,10/13/17,4,216,216,,,NA,NA,7,11/6/17,3,4,,,7,0,1,1,,
21238,CC001,"34,35x36",0,1,0,3/11/17,3/11/17,4/5/17,11/10/17,5,244,244,,,NA,NA,3,12/4/17,2,1,,,3,0,1,1,,
21238,CC001,"34,35x36",0,1,0,3/11/17,3/11/17,4/5/17,12/1/17,6,265,265,,,NA,NA,6,12/26/17,3,3,,,6,0,1,1,,
21238,CC001,"343,344x345",0,1,0,10/4/16,10/4/16,10/31/16,12/19/16,1,76,76,12/20/16,,76,NA,6,1/9/17,2,4,0,,6,0,2,2,,
21238,CC001,"343,344x345",0,1,0,12/20/16,12/20/16,1/9/17,3/26/17,2,96,96,,,NA,NA,7,4/17/17,3,4,0,,7,0,1,1,,
21238,CC001,"343,344x345",0,1,0,12/20/16,12/20/16,1/9/17,4/19/17,3,120,120,,,NA,NA,7,5/1/17,3,4,0,0,7,0,1,1,,
21238,CC001,"343,344x345",0,1,0,12/20/16,12/20/16,1/9/17,5/26/17,4,157,157,,,NA,NA,5,6/19/17,5,0,0,,5,0,1,1,,
21238,CC001,"346,347x348",0,1,0,10/4/16,10/4/16,10/31/16,12/14/16,1,71,71,,,71,NA,6,1/9/17,4,1,1,347 malloc 3/7/17,5,1,1,1,347 malloc 3/7/17,
21238,CC001,"349,350x351",0,1,0,9/27/16,9/27/16,10/31/16,12/6/16,1,70,70,,,70,NA,6,1/9/17,2,3,1,,5,1,1,1,,
21238,CC001,"349,350x351",0,1,0,9/27/16,9/27/16,10/31/16,12/29/16,2,93,93,,,NA,NA,4,1/27/17,2,2,0,,4,0,1,1,,
21238,CC001,"349,350x351",0,1,0,9/27/16,9/27/16,10/31/16,1/22/17,3,117,117,,,NA,NA,9,2/20/17,5,3,1,,8,1,1,1,,
21238,CC001,"349,350x351",0,1,0,9/27/16,9/27/16,10/31/16,2/14/17,4,140,140,,,NA,NA,6,NA,0,0,6,missing,0,6,1,0,missing,
21238,CC001,"349,350x351",0,1,0,9/27/16,9/27/16,10/31/16,3/4/17,5,158,158,,,NA,NA,7,3/27/17,3,3,1,,6,1,1,1,,
21238,CC001,"349,350x351",0,1,0,9/27/16,9/27/16,10/31/16,3/13/17,6,167,167,,,NA,NA,4,4/10/17,0,3,1,1 FD,3,1,1,1,1 FD,
21238,CC001,"349,350x351",0,1,0,9/27/16,9/27/16,10/31/16,3/31/17,7,185,185,,,NA,NA,2,4/28/17,1,1,0,,2,0,1,1,,
21238,CC001,"349,350x351",0,1,0,9/27/16,9/27/16,10/31/16,4/6/17,8,191,191,,,NA,NA,2,5/1/17,2,0,0,,2,0,1,1,,
21238,CC001,352x353,1,0,0,9/27/16,9/27/16,10/31/16,12/23/16,1,87,87,,,87,NA,5,1/16/17,1,4,0,,5,0,1,1,,
21238,CC001,352x353,1,0,0,9/27/16,9/27/16,10/31/16,1/16/17,2,111,111,,,NA,24,5,2/20/17,2,2,1,,4,1,1,1,,
21238,CC001,352x353,1,0,0,9/27/16,9/27/16,10/31/16,2/11/17,3,137,137,,,NA,26,7,3/6/17,2,2,3,,4,3,1,1,,
21238,CC001,352x353,1,0,0,9/27/16,9/27/16,10/31/16,4/10/17,4,195,195,,,NA,58,7,5/1/17,2,5,0,,7,0,1,1,,
21238,CC001,352x353,1,0,0,9/27/16,9/27/16,10/31/16,5/12/17,5,227,227,,,NA,32,6,6/5/17,2,2,2,,4,2,1,1,,
21238,CC001,352x353,1,0,0,9/27/16,9/27/16,10/31/16,6/5/17,6,251,251,,,NA,24,4,NA,0,0,4,missing; 353 culled,0,4,1,0,missing; 353 culled,
21238,CC001,"354,355x356",0,1,0,11/8/16,11/8/16,11/29/16,1/21/17,1,74,74,1/26/17,,74,NA,11,NA,4,6,1,1 missing; no wean date on card,10,1,2,2,1 missing; no wean date on card,
21238,CC001,"354,355x356",0,1,0,11/8/16,11/8/16,11/29/16,3/5/17,2,117,117,3/9/17,,NA,NA,14,3/29/17,6,3,5,missing,9,5,2,2,missing,
21238,CC001,"354,355x356",0,1,0,11/8/16,11/8/16,11/29/16,4/2/17,3,145,145,,,NA,NA,8,4/28/17,4,4,0,,8,0,1,1,,
21238,CC001,"354,355x356",0,1,0,11/8/16,11/8/16,11/29/16,5/17/17,4,190,190,,,NA,NA,7,6/5/17,3,2,2,2 FD,5,2,1,1,2 FD,
21238,CC001,"354,355x356",0,1,0,11/8/16,11/8/16,11/29/16,6/12/17,5,216,216,,,NA,NA,6,NA,0,0,6,,0,6,1,0,,
21238,CC001,"357,358x359",0,1,0,11/1/16,11/1/16,11/29/16,1/4/17,1,64,64,,,64,NA,4,1/23/17,1,3,0,,4,0,1,1,,
21238,CC001,"357,358x359",0,1,0,11/1/16,11/1/16,11/29/16,1/27/17,2,87,87,,,NA,NA,8,2/20/17,4,4,0,,8,0,1,1,,
21238,CC001,"357,358x359",0,1,0,11/1/16,11/1/16,11/29/16,2/21/17,3,112,112,,,NA,NA,6,3/30/17,3,1,2,,4,2,1,1,,
21238,CC001,"357,358x359",0,1,0,11/1/16,11/1/16,11/29/16,4/19/17,4,169,169,,,NA,NA,8,5/15/17,4,4,0,357 escaped 12/13/16,8,0,1,1,357 escaped 12/13/16,
21238,CC001,"360,361x362",0,1,0,11/22/16,11/22/16,12/12/16,NA,1,NA,NA,,,NA,NA,0,NA,0,0,,,0,0,1,0,nonproductive,
21238,CC001,"363,364x365",0,1,0,11/22/16,11/22/16,12/12/16,NA,1,NA,NA,,,NA,NA,0,NA,0,0,,,0,0,1,0,male FD,
21238,CC001,"366,367x368",0,1,0,11/22/16,11/22/16,12/12/16,3/5/17,1,103,103,,,103,NA,3,3/27/17,1,1,1,,2,1,1,1,,
21238,CC001,"366,367x368",0,1,0,11/22/16,11/22/16,12/12/16,3/27/17,2,125,125,,,NA,NA,9,4/17/17,2,6,1,,8,1,1,1,,
21238,CC001,"366,367x368",0,1,0,11/22/16,11/22/16,12/12/16,4/21/17,3,150,150,,,NA,NA,6,5/15/17,2,3,1,,5,1,1,1,,
21238,CC001,"366,367x368",0,1,0,11/22/16,11/22/16,12/12/16,5/16/17,4,175,175,,,NA,NA,4,NA,0,0,4,4 FD,0,4,1,0,4 FD,
21238,CC001,"366,367x368",0,1,0,11/22/16,11/22/16,12/12/16,6/12/17,5,202,202,,,NA,NA,6,7/3/17,5,1,0,,6,0,1,1,,
21238,CC001,"369,370x371",0,1,0,12/20/16,12/20/16,1/9/17,2/20/17,1,62,62,,,62,NA,3,3/13/17,1,1,NA,NA,2,1,1,1,,
21238,CC001,"369,370x371",0,1,0,12/20/16,12/20/16,1/9/17,2/29/17,2,71,71,,,NA,NA,3,3/21/17,1,1,21238,CC001,2,1,1,1,12/20/16,
21238,CC001,"369,370x371",0,1,0,12/20/16,12/20/16,1/9/17,3/19/17,3,89,89,,,NA,NA,1,3/27/17,NA,NA,NA,NA,NA,NA,1,0,pup missing,
21238,CC001,"369,370x371",0,1,0,12/20/16,12/20/16,1/9/17,3/25/17,4,95,95,,,NA,NA,2,4/10/17,NA,NA,NA,NA,NA,NA,1,0,missing pups,
21238,CC001,"369,370x371",0,1,0,12/20/16,12/20/16,1/9/17,4/10/17,5,111,111,,,NA,NA,8,5/1/17,4,4,0,0,8,0,1,1,,
21238,CC001,"369,370x371",0,1,0,12/20/16,12/20/16,1/9/17,4/18/17,6,119,119,,,NA,NA,7,5/1/17,NA,NA,NA,NA,NA,NA,1,0,missing pups,
21238,CC001,"369,370x371",0,1,0,12/20/16,12/20/16,1/9/17,5/12/17,7,143,143,,,NA,NA,7,6/5/17,3,3,1,0,6,1,1,1,,
21238,CC001,"369,370x371",0,1,0,12/20/16,12/20/16,1/9/17,6/28/17,8,190,190,,,NA,NA,9,7/24/17,3,4,NA,NA,7,2,1,1,,
21238,CC001,"37,38x39",0,1,0,4/6/17,4/6/17,4/27/17,6/17/17,1,72,72,,,72,NA,5,7/14/17,2,2,1,,4,1,1,1,,
21238,CC001,"37,38x39",0,1,0,4/6/17,4/6/17,4/27/17,7/10/17,2,95,95,,,NA,NA,5,7/31/17,2,3,0,,5,0,1,1,,
21238,CC001,"37,38x39",0,1,0,4/6/17,4/6/17,4/27/17,8/28/17,3,144,144,,,NA,NA,6,9/18/17,3,1,2,2 FD; 37 FD 5/10/17,4,2,1,1,2 FD; 37 FD 5/10/17,
21238,CC001,"375,376x377",0,1,0,12/6/16,12/6/16,1/9/17,2/21/17,1,77,77,,,77,NA,7,3/20/17,2,5,0,0,7,0,1,1,,
21238,CC001,"375,376x377",0,1,0,12/6/16,12/6/16,1/9/17,3/12/17,2,96,96,,,NA,NA,3,3/27/17,NA,NA,NA,NA,NA,NA,1,0,2 FD,
21238,CC001,"375,376x377",0,1,0,12/6/16,12/6/16,1/9/17,3/16/17,3,100,100,,,NA,NA,5,4/10/17,3,2,0,0,5,0,1,1,,
21238,CC001,"375,376x377",0,1,0,12/6/16,12/6/16,1/9/17,4/3/17,4,118,118,,,NA,NA,8,NA,NA,NA,NA,NA,NA,NA,1,0,3 FD,
21238,CC001,"375,376x377",0,1,0,12/6/16,12/6/16,1/9/17,4/8/17,5,123,123,,,NA,NA,5,5/1/17,3,1,NA,NA,4,1,1,1,,
21238,CC001,"375,376x377",0,1,0,12/6/16,12/6/16,1/9/17,5/25/17,6,170,170,,,NA,NA,5,6/19/17,2,2,NA,NA,4,1,1,1,,
21238,CC001,"375,376x377",0,1,0,12/6/16,12/6/16,1/9/17,6/10/17,7,186,186,,,NA,NA,4,7/3/17,3,1,0,0,4,0,1,1,,
21238,CC001,"375,376x377",0,1,0,12/6/16,12/6/16,1/9/17,7/6/17,8,212,212,,,NA,NA,7,NA,NA,NA,NA,NA,NA,NA,1,0,,
21238,CC001,"378,379x380",0,1,0,12/20/16,12/20/16,1/8/17,3/7/17,1,77,77,,,77,NA,7,3/27/17,2,5,0,0,7,0,1,1,,
21238,CC001,"378,379x380",0,1,0,12/20/16,12/20/16,1/8/17,3/28/17,2,98,98,,,NA,NA,7,4/17/17,2,5,0,0,7,0,1,1,,
21238,CC001,"378,379x380",0,1,0,12/20/16,12/20/16,1/8/17,4/24/17,3,125,125,,,NA,NA,4,5/15/17,2,2,0,0,4,0,1,1,,
21238,CC001,"378,379x380",0,1,0,12/20/16,12/20/16,1/8/17,5/19/17,4,150,150,,,NA,NA,6,6/12/17,3,3,0,0,6,0,1,1,,
21238,CC001,"384,385x386",0,1,0,1/17/17,1/17/17,2/20/17,4/14/17,1,87,87,,,87,NA,7,5/1/17,4,2,NA,NA,6,1,1,1,,
21238,CC001,"384,385x386",0,1,0,1/17/17,1/17/17,2/20/17,5/14/17,2,117,117,,,NA,NA,8,6/12/17,0,7,NA,NA,7,1,1,1,,
21238,CC001,"384,385x386",0,1,0,1/17/17,1/17/17,2/20/17,5/29/17,3,132,132,,,NA,NA,6,6/19/17,3,1,2,0,4,2,1,1,,
21238,CC001,"384,385x386",0,1,0,1/17/17,1/17/17,2/20/17,6/12/17,4,146,146,,,NA,NA,2,7/7/17,1,å,NA,NA,#VALUE!,NA,1,0,,
21238,CC001,"384,385x386",0,1,0,1/17/17,1/17/17,2/20/17,6/19/17,5,153,153,,,NA,NA,8,7/17/17,2,5,NA,NA,7,1,1,1,,
21238,CC001,"384,385x386",0,1,0,1/17/17,1/17/17,2/20/17,7/19/17,6,183,183,,,NA,NA,8,8/7/17,3,5,0,0,8,0,1,1,,
21238,CC001,"384,385x386",0,1,0,1/17/17,1/17/17,2/20/17,8/6/17,7,201,201,,,NA,NA,6,NA,NA,NA,NA,NA,NA,NA,1,0,,
21238,CC001,"387,388x389",0,1,0,1/24/17,1/24/17,2/20/17,NA,1,NA,NA,,,NA,NA,0,NA,0,0,,,0,0,1,0,nonproductive,
21238,CC001,"390,391x392",0,1,0,2/11/17,2/11/17,3/6/17,5/1/17,1,79,79,5/6/17,,79,NA,11,5/22/17,4,7,0,0,11,0,2,2,,
21238,CC001,"390,391x392",0,1,0,2/11/17,2/11/17,3/6/17,5/27/17,2,105,105,,,NA,NA,3,6/19/17,1,1,NA,NA,2,1,1,1,,
21238,CC001,"390,391x392",0,1,0,2/11/17,2/11/17,3/6/17,6/15/17,3,124,124,,,NA,NA,7,7/7/17,1,6,0,0,7,0,1,1,,
21238,CC001,"390,391x392",0,1,0,2/11/17,2/11/17,3/6/17,6/28/17,4,137,137,,,NA,NA,8,7/24/17,2,4,NA,NA,6,2,1,1,,
21238,CC001,"390,391x392",0,1,0,2/11/17,2/11/17,3/6/17,7/7/17,5,146,146,,,NA,NA,3,7/31/17,0,3,0,0,3,0,1,1,,
21238,CC001,"390,391x392",0,1,0,2/11/17,2/11/17,3/6/17,7/19/17,6,158,158,,,NA,NA,4,7/31/17,NA,NA,NA,NA,NA,NA,1,0,missing pups,
21238,CC001,"393,394x395",0,1,0,3/7/17,3/7/17,3/27/17,7/1/17,1,116,116,,,116,NA,6,7/24/17,2,3,NA,NA,5,1,1,1,,
21238,CC001,"399,400x401",0,1,0,3/16/17,3/16/17,4/10/17,5/25/17,1,70,70,,,70,NA,5,6/12/17,4,1,0,0,5,0,1,1,,
21238,CC001,"399,400x401",0,1,0,3/16/17,3/16/17,4/10/17,5/29/17,2,74,74,,,NA,NA,4,6/19/17,1,2,1,0,3,1,1,1,,
21238,CC001,"399,400x401",0,1,0,3/16/17,3/16/17,4/10/17,6/19/17,3,95,95,,,NA,NA,4,7/17/17,1,3,0,0,4,0,1,1,,
21238,CC001,"399,400x401",0,1,0,3/16/17,3/16/17,4/10/17,7/10/17,4,116,116,,,NA,NA,9,7/31/17,5,3,NA,NA,8,1,1,1,,
21238,CC001,"402,403x404",0,1,0,4/24/17,4/24/17,5/15/17,6/28/17,1,65,65,,,65,NA,6,7/17/17,3,2,NA,NA,5,1,1,1,,
21238,CC001,"402,403x404",0,1,0,4/24/17,4/24/17,5/15/17,7/1/17,2,68,68,,,NA,NA,5,7/24/17,3,2,0,0,5,0,1,1,,
21238,CC001,"402,403x404",0,1,0,4/24/17,4/24/17,5/15/17,7/18/17,3,85,85,,,NA,NA,4,7/31/17,NA,NA,NA,NA,NA,NA,1,0,missing pups,
21238,CC001,"402,403x404",0,1,0,4/24/17,4/24/17,5/15/17,8/12/17,4,110,110,,,NA,NA,8,NA,NA,NA,NA,NA,NA,NA,1,0,,
21238,CC001,"405,406x407",0,1,0,4/19/17,4/19/17,5/15/17,7/26/17,1,98,98,,,98,NA,14,8/14/17,4,8,2,0,12,2,1,1,,
21238,CC001,"408,409x410",0,1,0,4/19/17,4/19/17,5/15/17,6/21/17,1,63,63,,,63,NA,3,7/17/17,0,3,,,3,0,1,1,,
21238,CC001,"408,409x410",0,1,0,4/19/17,4/19/17,5/15/17,6/27/17,2,69,69,,,NA,NA,2,7/17/17,0,0,NA,NA,0,2,1,0,missing pups,
21238,CC001,"408,409x410",0,1,0,4/19/17,4/19/17,5/15/17,7/14/17,3,86,86,,,NA,NA,3,NA,0,0,NA,NA,0,3,1,0,missing pups,
21238,CC001,"408,409x410",0,1,0,4/19/17,4/19/17,5/15/17,7/18/17,4,90,90,,,NA,NA,5,8/7/17,2,3,0,0,5,0,1,1,,
21238,CC001,"408,409x410",0,1,0,4/19/17,4/19/17,5/15/17,8/8/17,5,111,111,,,NA,NA,7,NA,NA,NA,NA,NA,NA,NA,1,0,,
21238,CC001,40x41,1,0,0,4/6/17,4/6/17,4/27/17,NA,1,NA,NA,,,NA,NA,0,NA,0,0,,,0,0,1,0,40 FD 6/7/16; nonproductive,
21238,CC001,"411,412x413",0,1,0,4/21/17,4/21/17,5/15/17,7/11/17,1,81,81,,,81,NA,8,7/21/17,6,2,0,0,8,0,1,1,,
21238,CC001,"411,412x413",0,1,0,4/21/17,4/21/17,5/15/17,8/3/17,2,104,104,,,NA,NA,7,NA,NA,NA,NA,NA,NA,NA,1,0,,
21238,CC001,"411,412x413",0,1,0,4/21/17,4/21/17,5/15/17,8/6/17,3,107,107,,,NA,NA,7,NA,NA,NA,NA,NA,NA,NA,1,0,,
21238,CC001,"414,415x416",0,1,0,5/12/17,5/12/17,6/5/17,8/13/17,1,93,93,,,93,NA,6,NA,0,0,NA,NA,0,6,1,0,,
21238,CC001,"417,418x419",0,1,0,5/17/17,5/17/17,6/5/17,7/23/17,1,67,67,,,67,NA,5,8/14/17,1,2,2,0,3,2,1,1,,
21238,CC001,"42,43x44",0,1,0,4/21/17,4/21/17,5/12/17,7/12/17,1,82,82,,,82,NA,6,NA,0,0,,,0,6,1,0,,
21238,CC001,"42,43x44",0,1,0,4/21/17,4/21/17,5/12/17,8/23/17,2,124,124,,,NA,NA,9,9/11/17,4,5,,,9,0,1,1,,
21238,CC001,"42,43x44",0,1,0,4/21/17,4/21/17,5/12/17,9/16/17,3,148,148,,,NA,NA,7,10/9/17,3,2,,,5,2,1,1,,
21238,CC001,"42,43x44",0,1,0,4/21/17,4/21/17,5/12/17,10/28/17,4,190,190,,,NA,NA,8,11/27/17,2,5,,,7,1,1,1,,
21238,CC001,"420,421x422",0,1,0,6/18/17,6/18/17,7/17/17,NA,1,NA,NA,,,NA,NA,0,NA,0,0,0,0,0,0,1,0,,
21238,CC001,"426,427x428",0,1,0,6/27/17,6/27/17,7/31/17,NA,1,NA,NA,,,NA,NA,0,NA,0,0,0,0,0,0,1,0,,
21238,CC001,"429,430x431",0,1,0,6/20/17,6/20/17,7/31/17,NA,1,NA,NA,,,NA,NA,0,NA,0,0,0,0,0,0,1,0,,
21238,CC001,"432,433x434",0,1,0,7/25/17,7/25/17,8/14/17,NA,1,NA,NA,,,NA,NA,0,NA,NA,NA,NA,NA,NA,NA,1,0,,
21238,CC001,"45,46x47",0,1,0,4/21/17,4/21/17,5/12/17,7/25/17,1,95,95,,,95,NA,3,NA,0,0,3,,0,3,1,0,,
21238,CC001,"48,49x50",0,1,0,5/15/17,5/15/17,6/12/17,7/30/17,1,76,76,,,76,NA,8,8/21/17,3,5,0,,8,0,1,1,,
21238,CC001,"48,49x50",0,1,0,5/15/17,5/15/17,6/12/17,9/30/17,2,138,138,,,NA,NA,8,10/23/17,3,4,1,,7,1,1,1,,
21238,CC001,"48,49x50",0,1,0,5/15/17,5/15/17,6/12/17,11/21/17,3,190,190,,,NA,NA,8,12/18/17,1,4,3,3 missing; 48 escaped 7/1/17,5,3,1,1,3 missing; 48 escaped 7/1/17,
21238,CC001,"51,52x53",0,1,0,5/22/17,5/22/17,6/12/17,7/29/17,1,68,68,,,68,NA,3,8/21/17,3,0,0,51 FD 7/3/17,3,0,1,1,51 FD 7/3/17,
21238,CC001,"54,55x56",0,1,0,6/10/17,6/10/17,7/3/17,8/23/17,1,74,74,,,74,NA,5,9/11/17,2,2,1,,4,1,1,1,,
21238,CC001,"54,55x56",0,1,0,6/10/17,6/10/17,7/3/17,8/28/17,2,79,79,,,NA,NA,8,9/18/17,3,3,2,,6,2,1,1,,
21238,CC001,"54,55x56",0,1,0,6/10/17,6/10/17,7/3/17,9/19/17,3,101,101,,,NA,NA,6,10/9/17,2,4,0,,6,0,1,1,,
21238,CC001,"54,55x56",0,1,0,6/10/17,6/10/17,7/3/17,10/8/17,4,120,120,,,NA,NA,9,10/31/17,2,7,0,,9,0,1,1,,
21238,CC001,"54,55x56",0,1,0,6/10/17,6/10/17,7/3/17,10/25/17,5,137,137,,,NA,NA,5,11/20/17,2,2,1,,4,1,1,1,,
21238,CC001,"54,55x56",0,1,0,6/10/17,6/10/17,7/3/17,11/1/17,6,144,144,,,NA,NA,7,11/27/17,3,3,1,1 missing,6,1,1,1,1 missing,
21238,CC001,"54,55x56",0,1,0,6/10/17,6/10/17,7/3/17,11/15/17,7,158,158,,,NA,NA,7,NA,0,0,7,missing,0,7,1,0,missing,
21238,CC001,"54,55x56",0,1,0,6/10/17,6/10/17,7/3/17,12/23/17,8,196,196,,,NA,NA,7,1/19/18,4,2,1,1 FD,6,1,1,1,1 FD,
21238,CC001,"54,55x56",0,1,0,6/10/17,6/10/17,7/3/17,1/10/18,9,214,214,,,NA,NA,8,2/5/18,3,5,0,,8,0,1,1,,
21238,CC001,"54,55x56",0,1,0,6/10/17,6/10/17,7/3/17,2/19/18,10,254,254,,,NA,NA,7,3/19/18,3,3,1,,6,1,1,1,,
21238,CC001,"57,58x59",0,1,0,6/25/17,6/25/17,7/17/17,NA,1,NA,NA,,,NA,NA,0,NA,0,0,0,,0,0,1,0,,
21238,CC001,"60,61x62",0,1,0,7/19/17,7/19/17,8/14/17,9/30/17,1,73,73,,,73,NA,7,10/23/17,3,4,,,7,0,1,1,,
21238,CC001,"60,61x62",0,1,0,7/19/17,7/19/17,8/14/17,10/28/17,2,101,101,,,NA,NA,6,11/27/17,2,4,,,6,0,1,1,,
21238,CC001,"60,61x62",0,1,0,7/19/17,7/19/17,8/14/17,11/19/17,3,123,123,,,NA,NA,8,12/11/17,2,5,,,7,1,1,1,missign,
21238,CC001,"60,61x62",0,1,0,7/19/17,7/19/17,8/14/17,1/30/18,4,195,195,,,NA,NA,8,2/26/18,4,4,,,8,0,1,1,,
21238,CC001,"63,64x65",0,1,0,7/19/17,7/19/17,8/14/17,10/14/17,1,87,87,,,87,NA,7,11/6/17,3,4,,,7,0,1,1,,
21238,CC001,"63,64x65",0,1,0,7/19/17,7/19/17,8/14/17,10/16/17,2,89,89,,,NA,NA,4,NA,0,0,,,0,4,1,0,missing,
21238,CC001,"63,64x65",0,1,0,7/19/17,7/19/17,8/14/17,11/4/17,3,108,108,,,NA,NA,2,NA,0,0,,,0,2,1,0,1 BD,
21238,CC001,"63,64x65",0,1,0,7/19/17,7/19/17,8/14/17,11/8/17,4,112,112,,,NA,NA,8,12/4/17,3,5,,,8,0,1,1,,
21238,CC001,"63,64x65",0,1,0,7/19/17,7/19/17,8/14/17,12/4/17,5,138,138,,,NA,NA,5,1/2/18,0,4,,,4,1,1,1,1 missing,
21238,CC001,"63,64x65",0,1,0,7/19/17,7/19/17,8/14/17,1/24/18,6,189,189,,,NA,NA,4,2/28/18,1,3,,,4,0,1,1,,
21238,CC001,"63,64x65",0,1,0,7/19/17,7/19/17,8/14/17,3/25/18,7,249,249,,,NA,NA,5,4/23/18,0,5,,,5,0,1,1,,
21238,CC001,"66,67x68",0,1,0,8/23/17,8/23/17,9/10/17,11/11/17,1,80,80,11/17/17,,80,NA,13,12/11/17,7,4,,,11,2,2,2,,
21238,CC001,"66,67x68",0,1,0,8/23/17,8/23/17,9/10/17,12/11/17,2,110,110,,,NA,NA,7,1/19/18,5,2,,,7,0,1,1,,
21238,CC001,"66,67x68",0,1,0,8/23/17,8/23/17,9/10/17,1/22/18,3,152,152,,,NA,NA,8,2/23/18,6,1,,,7,1,1,1,1 found dead,
21238,CC001,"69,70x71",0,1,0,8/23/17,8/23/17,9/18/17,11/4/17,1,73,73,,,73,NA,2,12/4/17,1,1,0,,2,0,1,1,,
21238,CC001,"69,70x71",0,1,0,8/23/17,8/23/17,9/18/17,11/26/17,2,95,95,,,NA,NA,3,12/12/17,1,1,1,1 missing,2,1,1,1,1 missing,
21238,CC001,"69,70x71",0,1,0,8/23/17,8/23/17,9/18/17,12/7/17,3,106,106,,,NA,NA,6,1/2/18,5,1,0,,6,0,1,1,,
21238,CC001,"69,70x71",0,1,0,8/23/17,8/23/17,9/18/17,1/6/18,4,136,136,,,NA,NA,4,2/5/18,2,1,1,1 escape,3,1,1,1,1 escape,
21238,CC001,"72,73x74",0,1,0,9/16/17,9/16/17,10/9/17,NA,1,NA,NA,,,NA,NA,0,NA,0,0,0,wet box 10/29/17; 72 and 74 FD,0,0,1,0,wet box 10/29/17; 72 and 74 FD,
21238,CC001,"75,76x77",0,1,0,10/9/17,10/9/17,10/31/17,NA,1,NA,NA,,,NA,NA,0,NA,0,0,0,,0,0,1,0,,
21238,CC001,78x79,1,0,0,10/9/17,10/9/17,10/31/17,NA,1,NA,NA,,,NA,NA,0,NA,0,0,0,,0,0,1,0,,
21238,CC001,"80,81x82",0,1,0,10/8/17,10/8/17,10/31/17,12/20/17,1,73,73,,,73,NA,11,1/19/18,3,6,2,2 missing; nonproductive; 80 FD 1/6/18,9,2,1,1,2 missing; nonproductive; 80 FD 1/6/18,
21238,CC001,"83,84x85",0,1,0,11/8/17,11/8/17,12/18/17,1/22/18,1,75,75,1/24/18,,75,NA,10,2/23/18,5,3,,,8,2,2,2,missing,
21238,CC001,86x87,1,0,0,11/8/17,11/8/17,12/18/17,1/14/18,1,67,67,,,67,NA,5,2/12/18,1,4,0,,5,0,1,1,,
21238,CC001,86x87,1,0,0,11/8/17,11/8/17,12/18/17,2/27/18,2,111,111,,,NA,44,7,3/26/18,4,3,0,,7,0,1,1,,
21238,CC001,86x87,1,0,0,11/8/17,11/8/17,12/18/17,4/10/18,3,153,153,,,NA,42,9,5/7/18,2,7,0,,9,0,1,1,,
21238,CC001,88x89,1,0,0,11/26/17,11/26/17,1/2/18,1/31/18,1,66,66,,,66,NA,2,3/5/18,2,0,0,,2,0,1,1,,
21238,CC001,88x89,1,0,0,11/26/17,11/26/17,1/2/18,2/20/18,2,86,86,,,NA,20,7,3/19/18,4,1,2,,5,2,1,1,,
21238,CC001,88x89,1,0,0,11/26/17,11/26/17,1/2/18,4/4/18,3,129,129,,,NA,43,4,4/30/18,1,2,1,missing,3,1,1,1,missing,
21238,CC001,88x89,1,0,0,11/26/17,11/26/17,1/2/18,5/30/18,4,185,185,,,NA,56,1,6/25/18,0,0,1,4 BD,0,1,1,0,4 BD,
21238,CC001,"90,91x92",0,1,0,12/1/17,12/1/17,1/2/18,2/14/18,1,75,75,,,75,NA,2,NA,0,0,2,FD,0,2,1,0,FD,
21238,CC001,"90,91x92",0,1,0,12/1/17,12/1/17,1/2/18,2/15/18,2,76,76,,,NA,NA,10,3/12/18,5,4,1,,9,1,1,1,,
21238,CC001,"90,91x92",0,1,0,12/1/17,12/1/17,1/2/18,3/9/18,3,98,98,3/11/18,,NA,NA,13,4/2/18,4,9,0,,13,0,2,2,,
21238,CC001,"90,91x92",0,1,0,12/1/17,12/1/17,1/2/18,4/2/18,4,122,122,,,NA,NA,7,NA,0,0,7,missing,0,7,1,0,missing,
21238,CC001,93x94,1,0,0,12/1/17,12/1/17,1/2/18,2/16/18,1,77,77,,,77,NA,5,3/12/18,2,3,0,,5,0,1,1,,
21238,CC001,93x94,1,0,0,12/1/17,12/1/17,1/2/18,3/9/18,2,98,98,,,NA,21,2,NA,0,0,2,missing,0,2,1,0,missing,
21238,CC001,93x94,1,0,0,12/1/17,12/1/17,1/2/18,4/6/18,3,126,126,,,NA,28,5,4/30/18,2,2,1,1 FD,4,1,1,1,1 FD,
21238,CC001,93x94,1,0,0,12/1/17,12/1/17,1/2/18,4/30/18,4,150,150,,,NA,24,3,5/29/18,2,0,1,1 missing,2,1,1,1,1 missing,
21238,CC001,93x94,1,0,0,12/1/17,12/1/17,1/2/18,6/13/18,5,194,194,,,NA,44,6,7/9/18,1,5,0,,6,0,1,1,,
21238,CC001,93x94,1,0,0,12/1/17,12/1/17,1/2/18,7/9/18,6,220,220,,,NA,26,3,8/6/18,1,1,1,1 missing,2,1,1,1,1 missing,
21238,CC001,"98,99x100",0,1,0,1/30/18,1/30/18,3/26/18,4/15/18,1,75,75,4/17/18,,75,NA,10,5/14/18,5,4,1,,9,1,2,2,,
21238,CC001,"98,99x100",0,1,0,1/30/18,1/30/18,3/26/18,5/8/18,2,98,98,,,NA,NA,3,NA,0,0,3,3 missing,0,3,1,0,3 missing,
21238,CC001,"98,99x100",0,1,0,1/30/18,1/30/18,3/26/18,6/11/18,3,132,132,,,NA,NA,8,7/9/18,4,2,2,,6,2,1,1,,
21237,CC002,"342,343,344",1,0,0,9/13/16,9/13/16,10/10/16,11/29/16,1,77,77,,,77,NA,4,12/19/16,0,2,2,missing,2,2,1,1,missing,
21237,CC002,"342,343,344",1,0,0,9/13/16,9/13/16,10/10/16,12/15/16,2,93,93,12/19/16,,NA,16,5,1/9/17,3,2,0,,5,0,2,2,,
21237,CC002,"342,343,344",1,0,0,9/13/16,9/13/16,10/10/16,1/6/17,3,115,115,,,NA,22,1,1/30/17,0,1,0,,1,0,1,1,,
21237,CC002,"342,343,344",1,0,0,9/13/16,9/13/16,10/10/16,1/14/17,4,123,123,,,NA,8,2,1/30/17,1,1,0,,2,0,1,1,,
21237,CC002,"342,343,344",1,0,0,9/13/16,9/13/16,10/10/16,1/28/17,5,137,137,,,NA,14,2,NA,0,0,2,missing,0,2,1,0,missing,
21237,CC002,"342,343,344",1,0,0,9/13/16,9/13/16,10/10/16,3/21/17,6,189,189,,,NA,52,2,4/10/17,2,0,0,,2,0,1,1,,
21237,CC002,"342,343,344",1,0,0,9/13/16,9/13/16,10/10/16,4/18/17,7,217,217,,,NA,28,2,5/1/17,0,1,1,342 FD 2/7/17,1,1,1,1,342 FD 2/7/17,
21237,CC002,"545,546,547",1,0,0,1/2/18,1/2/18,2/26/18,3/19/18,1,76,76,,,76,NA,2,NA,0,0,2,missing,0,2,1,0,missing,
21237,CC002,"545,546,547",1,0,0,1/2/18,1/2/18,2/26/18,4/9/18,2,97,97,,,NA,21,2,NA,0,0,2,missing,0,2,1,0,missing,
21237,CC002,"545,546,547",1,0,0,1/2/18,1/2/18,2/26/18,5/29/18,3,147,147,,,NA,50,6,6/18/18,2,1,3,1 BD,3,3,1,1,1 BD,
21237,CC002,"545,546,547",1,0,0,1/2/18,1/2/18,2/26/18,6/5/18,4,154,154,,,NA,7,4,6/25/18,0,1,3,3 missing,1,3,1,1,3 missing,
21237,CC002,"545,546,547",1,0,0,1/2/18,1/2/18,2/26/18,6/19/18,5,168,168,,,NA,14,2,7/17/18,1,1,0,,2,0,1,1,,
21236,CC002,01x02,1,0,0,7/11/17,7/11/17,8/17/17,10/9/17,1,90,90,,,90,NA,2,10/31/17,1,1,,,2,0,1,1,,
21236,CC002,01x02,1,0,0,7/11/17,7/11/17,8/17/17,11/24/17,2,136,136,,,NA,46,3,12/18/17,1,2,,,3,0,1,1,,
21236,CC002,03x04,1,0,0,7/11/17,7/11/17,8/17/17,9/25/17,1,76,76,,,76,NA,6,10/10/17,3,3,,,6,0,1,1,,
21236,CC002,"05,06x07",0,1,0,9/25/17,9/25/17,10/16/17,2/4/18,1,132,132,,,132,NA,1,3/1/18,0,0,,,0,1,1,0,missing,
21236,CC002,"05,06x07",0,1,0,9/25/17,9/25/17,10/16/17,2/24/18,2,152,152,,,NA,NA,4,3/26/18,3,1,,,4,0,1,1,,
21236,CC002,"05,06x07",0,1,0,9/25/17,9/25/17,10/16/17,3/20/18,3,176,176,,,NA,NA,3,4/17/18,1,2,,,3,0,1,1,,
21236,CC002,"05,06x07",0,1,0,9/25/17,9/25/17,10/16/17,4/2/18,4,189,189,,,NA,NA,3,4/30/18,2,0,,,2,1,1,1,1 escaped,
21236,CC002,"05,06x07",0,1,0,9/25/17,9/25/17,10/16/17,4/10/18,5,197,197,,,NA,NA,3,5/7/18,2,1,,,3,0,1,1,,
21236,CC002,"05,06x07",0,1,0,9/25/17,9/25/17,10/16/17,6/5/18,6,253,253,,,NA,NA,2,7/2/18,0,1,,,1,1,1,1,1 FD,
21236,CC002,"05,06x07",0,1,0,9/25/17,9/25/17,10/16/17,6/29/18,7,277,277,,,NA,NA,2,NA,0,0,,,0,2,1,0,pups fostered,
21236,CC002,08x09,1,0,0,9/25/17,9/25/17,10/16/17,NA,1,NA,NA,,,NA,NA,0,NA,0,0,,,0,0,1,0,,
21236,CC002,"1,2x3",0,1,0,4/5/16,4/5/16,5/5/16,NA,1,NA,NA,,,NA,NA,0,NA,0,0,,,0,0,1,0,nonproductive,
21236,CC002,10x11,1,0,0,10/9/17,10/9/17,10/31/17,NA,1,NA,NA,,,NA,NA,0,NA,0,0,,,0,0,1,0,,
21236,CC002,12x13,1,0,0,11/24/17,11/24/17,1/2/18,1/30/18,1,67,67,,,67,NA,4,2/26/18,2,2,0,,4,0,1,1,,
21236,CC002,12x13,1,0,0,11/24/17,11/24/17,1/2/18,2/27/18,2,95,95,,,NA,28,3,3/26/18,2,1,0,,3,0,1,1,,
21236,CC002,12x13,1,0,0,11/24/17,11/24/17,1/2/18,4/22/18,3,149,149,,,NA,54,6,5/21/18,4,1,1,,5,1,1,1,,
21236,CC002,12x13,1,0,0,11/24/17,11/24/17,1/2/18,5/20/18,4,177,177,,,NA,28,3,6/18/18,2,1,0,1 FD,3,0,1,1,1 FD,
21236,CC002,16x17,1,0,0,1/30/18,1/30/18,3/19/18,NA,1,NA,NA,,,NA,NA,0,NA,0,0,0,,0,0,1,0,,
21236,CC002,"22,23x24",0,1,0,2/27/18,2/27/18,4/2/18,NA,1,NA,NA,,,NA,NA,0,NA,0,0,0,,0,0,1,0,,
21237,CC002,"303,304x305",0,1,0,5/24/16,5/24/16,6/27/16,8/4/16,1,72,72,,,72,NA,4,9/6/16,2,1,1,,3,1,1,1,,
21237,CC002,"303,304x305",0,1,0,5/24/16,5/24/16,6/27/16,8/16/16,2,84,84,,,NA,NA,4,9/6/16,2,1,1,,3,1,1,1,,
21237,CC002,"303,304x305",0,1,0,5/24/16,5/24/16,6/27/16,9/29/16,3,128,128,,,NA,NA,5,10/17/16,3,2,0,,5,0,1,1,,
21237,CC002,"303,304x305",0,1,0,5/24/16,5/24/16,6/27/16,11/10/16,4,170,170,,,NA,NA,4,12/5/16,2,2,0,,4,0,1,1,,
21237,CC002,"303,304x305",0,1,0,5/24/16,5/24/16,6/27/16,12/8/16,5,198,198,,,NA,NA,3,12/27/16,1,2,0,,3,0,1,1,,
21237,CC002,"303,304x305",0,1,0,5/24/16,5/24/16,6/27/16,1/29/17,6,250,250,,,NA,NA,1,2/20/17,1,0,0,,1,0,1,1,,
21237,CC002,"306,307x308",0,1,0,5/24/16,5/24/16,6/27/16,8/8/16,1,76,76,,,76,NA,1,NA,0,0,1,,0,1,1,0,,
21237,CC002,"306,307x308",0,1,0,5/24/16,5/24/16,6/27/16,9/2/16,2,101,101,,,NA,NA,6,9/23/16,5,1,0,,6,0,1,1,,
21237,CC002,"306,307x308",0,1,0,5/24/16,5/24/16,6/27/16,10/19/16,3,148,148,,,NA,NA,9,11/9/16,4,5,0,,9,0,1,1,,
21237,CC002,"306,307x308",0,1,0,5/24/16,5/24/16,6/27/16,11/28/16,4,188,188,,,NA,NA,5,12/19/16,2,2,1,,4,1,1,1,,
21237,CC002,"306,307x308",0,1,0,5/24/16,5/24/16,6/27/16,12/2/16,5,192,192,,,NA,NA,6,12/27/16,1,4,1,,5,1,1,1,,
21237,CC002,"306,307x308",0,1,0,5/24/16,5/24/16,6/27/16,1/1/17,6,222,222,,,NA,NA,2,1/23/17,2,0,0,,2,0,1,1,,
21237,CC002,"306,307x308",0,1,0,5/24/16,5/24/16,6/27/16,1/17/17,7,238,238,1/21/17,,NA,NA,7,2/20/17,6,1,0,,7,0,2,2,,
21237,CC002,"312,313x314",0,1,0,6/28/16,6/28/16,7/25/16,9/14/16,1,78,78,,,78,NA,2,10/10/16,2,0,0,,2,0,1,1,,
21237,CC002,"312,313x314",0,1,0,6/28/16,6/28/16,7/25/16,10/4/16,2,98,98,,,NA,NA,4,10/24/16,0,1,3,3 missing,1,3,1,1,3 missing,
21237,CC002,"312,313x314",0,1,0,6/28/16,6/28/16,7/25/16,10/15/16,3,109,109,,,NA,NA,3,11/9/16,0,3,0,,3,0,1,1,,
21237,CC002,"312,313x314",0,1,0,6/28/16,6/28/16,7/25/16,11/29/16,4,154,154,,,NA,NA,4,12/19/16,1,1,2,,2,2,1,1,,
21237,CC002,"312,313x314",0,1,0,6/28/16,6/28/16,7/25/16,1/12/17,5,198,198,,,NA,NA,4,2/17/17,2,2,0,,4,0,1,1,,
21237,CC002,"315,316x317",0,1,0,7/26/16,7/26/16,8/15/16,9/29/16,1,65,65,10/6/16,,65,NA,6,10/24/16,4,2,0,,6,0,2,2,,
21237,CC002,"315,316x317",0,1,0,7/26/16,7/26/16,8/15/16,11/3/16,2,100,100,,,NA,NA,4,11/22/16,4,0,0,,4,0,1,1,,
21237,CC002,"315,316x317",0,1,0,7/26/16,7/26/16,8/15/16,11/9/16,3,106,106,,,NA,NA,3,11/28/16,0,0,3,missing,0,3,1,0,missing,
21237,CC002,"315,316x317",0,1,0,7/26/16,7/26/16,8/15/16,12/19/16,4,146,146,,,NA,NA,3,1/9/17,1,2,0,,3,0,1,1,,
21237,CC002,"315,316x317",0,1,0,7/26/16,7/26/16,8/15/16,12/27/16,5,154,154,,,NA,NA,2,NA,0,0,2,missing,0,2,1,0,missing,
21237,CC002,"315,316x317",0,1,0,7/26/16,7/26/16,8/15/16,1/11/17,6,169,169,,,NA,NA,3,1/30/17,0,3,0,,3,0,1,1,,
21237,CC002,"315,316x317",0,1,0,7/26/16,7/26/16,8/15/16,1/9/17,7,167,167,,,NA,NA,2,2/20/17,0,0,2,1 FD; missing,0,2,1,0,1 FD; missing,
21237,CC002,"315,316x317",0,1,0,7/26/16,7/26/16,8/15/16,1/14/17,8,172,172,,,NA,NA,2,2/27/17,0,0,2,missing,0,2,1,0,missing,
21237,CC002,"318,319x320",0,1,0,7/26/16,7/26/16,8/15/16,10/11/16,1,77,77,,,77,NA,7,11/9/16,2,2,3,,4,3,1,1,,
21237,CC002,"318,319x320",0,1,0,7/26/16,7/26/16,8/15/16,11/20/16,2,117,117,,,NA,NA,1,NA,0,0,1,missing,0,1,1,0,missing,
21237,CC002,"318,319x320",0,1,0,7/26/16,7/26/16,8/15/16,11/28/16,3,125,125,,,NA,NA,1,NA,0,0,1,missing,0,1,1,0,missing,
21237,CC002,"318,319x320",0,1,0,7/26/16,7/26/16,8/15/16,12/10/16,4,137,137,,,NA,NA,3,1/9/17,2,1,0,,3,0,1,1,,
21237,CC002,"318,319x320",0,1,0,7/26/16,7/26/16,8/15/16,1/30/17,5,188,188,,,NA,NA,8,2/20/17,2,4,2,2 missing,6,2,1,1,2 missing,
21237,CC002,"321,322x323",0,1,0,6/28/16,6/28/16,8/15/16,9/7/16,1,71,71,,,71,NA,3,10/3/16,0,3,0,,3,0,1,1,,
21237,CC002,"321,322x323",0,1,0,6/28/16,6/28/16,8/15/16,9/29/16,2,93,93,,,NA,NA,11,10/17/16,4,7,0,,11,0,1,1,,
21237,CC002,"321,322x323",0,1,0,6/28/16,6/28/16,8/15/16,10/18/16,3,112,112,,,NA,NA,5,11/9/16,2,2,1,,4,1,1,1,,
21237,CC002,"321,322x323",0,1,0,6/28/16,6/28/16,8/15/16,11/11/16,4,136,136,11/13/16,,NA,NA,7,12/5/16,2,2,3,,4,3,2,2,,
21237,CC002,"321,322x323",0,1,0,6/28/16,6/28/16,8/15/16,12/4/16,5,159,159,12/7/16,,NA,NA,6,12/27/16,1,4,1,,5,1,2,2,,
21237,CC002,"321,322x323",0,1,0,6/28/16,6/28/16,8/15/16,12/31/16,6,186,186,,,NA,NA,6,1/23/17,4,2,0,,6,0,1,1,,
21237,CC002,"324,325x326",0,1,0,8/2/16,8/2/16,9/6/16,11/15/16,1,105,105,,,105,NA,2,NA,0,0,2,,0,2,1,0,,
21237,CC002,"324,325x326",0,1,0,8/2/16,8/2/16,9/6/16,12/27/16,2,147,147,,,NA,NA,2,1/19/17,0,2,0,,2,0,1,1,,
21237,CC002,"324,325x326",0,1,0,8/2/16,8/2/16,9/6/16,2/20/17,3,202,202,,,NA,NA,2,3/17/17,1,1,0,,2,0,1,1,,
21236,CC002,"325,326x327",0,1,0,6/14/16,6/14/16,7/11/16,8/20/16,1,67,67,,,67,NA,2,9/12/16,0,2,0,,2,0,1,1,,
21236,CC002,"325,326x327",0,1,0,6/14/16,6/14/16,7/11/16,9/5/16,2,83,83,9/9/16,,NA,NA,8,9/19/16,2,6,0,,8,0,2,2,,
21236,CC002,"325,326x327",0,1,0,6/14/16,6/14/16,7/11/16,9/27/16,3,105,105,,,NA,NA,3,10/17/16,2,1,0,,3,0,1,1,,
21236,CC002,"325,326x327",0,1,0,6/14/16,6/14/16,7/11/16,10/19/16,4,127,127,,,NA,NA,3,11/11/16,1,1,1,1 missing,2,1,1,1,1 missing,
21236,CC002,"325,326x327",0,1,0,6/14/16,6/14/16,7/11/16,11/2/16,5,141,141,,,NA,NA,5,11/25/16,3,1,1,1 missing,4,1,1,1,1 missing,
21236,CC002,"325,326x327",0,1,0,6/14/16,6/14/16,7/11/16,11/12/16,6,151,151,,,NA,NA,4,12/5/16,2,1,1,missing,3,1,1,1,missing,
21237,CC002,"327,328x329",0,1,0,8/16/16,8/16/16,9/6/16,10/31/16,1,76,76,11/3/16,,76,NA,13,11/22/16,3,8,2,,11,2,2,2,,
21237,CC002,"327,328x329",0,1,0,8/16/16,8/16/16,9/6/16,11/23/16,2,99,99,,,NA,NA,4,12/19/16,2,2,0,,4,0,1,1,,
21237,CC002,"327,328x329",0,1,0,8/16/16,8/16/16,9/6/16,12/13/16,3,119,119,,,NA,NA,2,NA,0,0,2,,0,2,1,0,,
21237,CC002,"327,328x329",0,1,0,8/16/16,8/16/16,9/6/16,12/31/16,4,137,137,,,NA,NA,6,1/23/17,2,4,0,,6,0,1,1,,
21237,CC002,"327,328x329",0,1,0,8/16/16,8/16/16,9/6/16,1/22/17,5,159,159,,,NA,NA,6,2/20/17,2,3,1,1 missing,5,1,1,1,1 missing,
21237,CC002,"327,328x329",0,1,0,8/16/16,8/16/16,9/6/16,2/14/17,6,182,182,,,NA,NA,4,3/6/17,1,3,0,,4,0,1,1,,
21236,CC002,"328,329x330",0,1,0,7/12/16,7/12/16,8/8/16,9/18/16,1,68,68,,,68,NA,4,10/10/16,0,2,2,,2,2,1,1,,
21236,CC002,"328,329x330",0,1,0,7/12/16,7/12/16,8/8/16,10/30/16,2,110,110,,,NA,NA,4,11/21/16,1,3,0,,4,0,1,1,,
21236,CC002,"328,329x330",0,1,0,7/12/16,7/12/16,8/8/16,1/1/17,3,173,173,,,NA,NA,4,1/27/17,2,1,1,1 FD,3,1,1,1,1 FD,
21237,CC002,"330,331x332",0,1,0,8/16/16,8/16/16,9/6/16,10/25/16,1,70,70,,,70,NA,4,11/22/16,2,2,0,330 FD 12/13/16,4,0,1,1,330 FD 12/13/16,
21236,CC002,"331,332x333",0,1,0,8/2/16,8/2/16,8/22/16,10/13/16,1,72,72,,,72,NA,6,11/11/16,2,4,0,,6,0,1,1,,
21236,CC002,"331,332x333",0,1,0,8/2/16,8/2/16,8/22/16,11/7/16,2,97,97,11/9/16,,NA,NA,10,11/29/16,8,2,0,,10,0,2,2,,
21236,CC002,"331,332x333",0,1,0,8/2/16,8/2/16,8/22/16,12/30/16,3,150,150,,,NA,NA,7,1/16/17,1,6,0,,7,0,1,1,,
21236,CC002,"331,332x333",0,1,0,8/2/16,8/2/16,8/22/16,2/11/17,4,193,193,,,NA,NA,2,3/6/17,0,2,0,,2,0,1,1,,
21237,CC002,"332,334x335",0,1,0,8/23/16,8/23/16,9/12/16,10/31/16,1,69,69,,,69,NA,3,NA,0,0,3,missing,0,3,1,0,missing,
21237,CC002,"332,334x335",0,1,0,8/23/16,8/23/16,9/12/16,11/25/16,2,94,94,,,NA,NA,3,12/16/16,1,2,0,,3,0,1,1,,
21237,CC002,"332,334x335",0,1,0,8/23/16,8/23/16,9/12/16,1/4/17,3,134,134,,,NA,NA,2,1/23/17,0,2,0,,2,0,1,1,,
21237,CC002,"332,334x335",0,1,0,8/23/16,8/23/16,9/12/16,1/9/17,4,139,139,,,NA,NA,3,1/30/17,2,0,1,,2,1,1,1,,
21237,CC002,"332,334x335",0,1,0,8/23/16,8/23/16,9/12/16,1/30/17,5,160,160,,,NA,NA,3,2/27/17,2,1,0,,3,0,1,1,,
21237,CC002,"332,334x335",0,1,0,8/23/16,8/23/16,9/12/16,2/22/17,6,183,183,,,NA,NA,3,3/17/17,3,0,0,,3,0,1,1,,
21237,CC002,"332,334x335",0,1,0,8/23/16,8/23/16,9/12/16,4/5/17,7,225,225,,,NA,NA,1,NA,0,0,1,,0,1,1,0,,
21236,CC002,"334,335x336",0,1,0,7/19/16,7/19/16,9/6/16,10/6/16,1,79,79,,,79,NA,4,10/31/16,3,1,0,,4,0,1,1,,
21236,CC002,"334,335x336",0,1,0,7/19/16,7/19/16,9/6/16,10/25/16,2,98,98,,,NA,NA,3,11/14/16,1,2,0,,3,0,1,1,,
21236,CC002,"334,335x336",0,1,0,7/19/16,7/19/16,9/6/16,11/20/16,3,124,124,,,NA,NA,6,12/12/16,2,4,0,,6,0,1,1,,
21236,CC002,"334,335x336",0,1,0,7/19/16,7/19/16,9/6/16,11/27/16,4,131,131,,,NA,NA,4,12/27/16,2,1,1,,3,1,1,1,,
21236,CC002,"334,335x336",0,1,0,7/19/16,7/19/16,9/6/16,12/17/16,5,151,151,,,NA,NA,5,1/9/17,1,4,0,,5,0,1,1,,
21236,CC002,"334,335x336",0,1,0,7/19/16,7/19/16,9/6/16,12/23/16,6,157,157,,,NA,NA,3,1/16/17,1,2,0,,3,0,1,1,,
21236,CC002,"334,335x336",0,1,0,7/19/16,7/19/16,9/6/16,1/9/17,7,174,174,,,NA,NA,4,2/17/17,2,1,1,missing,3,1,1,1,missing,
21236,CC002,"334,335x336",0,1,0,7/19/16,7/19/16,9/6/16,1/18/17,8,183,183,,,NA,NA,6,2/17/17,2,3,1,,5,1,1,1,,
21236,CC002,"334,335x336",0,1,0,7/19/16,7/19/16,9/6/16,2/2/17,9,198,198,,,NA,NA,2,3/21/17,0,0,2,missing,0,2,1,0,missing,
21237,CC002,"336,337x338",0,1,0,9/13/16,9/13/16,10/10/16,12/6/16,1,84,84,,,84,NA,4,12/27/16,1,1,2,2 missing,2,2,1,1,2 missing,
21237,CC002,"336,337x338",0,1,0,9/13/16,9/13/16,10/10/16,12/27/16,2,105,105,,,NA,NA,2,NA,0,0,2,missing,0,2,1,0,missing,
21237,CC002,"336,337x338",0,1,0,9/13/16,9/13/16,10/10/16,1/11/17,3,120,120,,,NA,NA,3,1/30/17,1,2,0,,3,0,1,1,,
21237,CC002,"336,337x338",0,1,0,9/13/16,9/13/16,10/10/16,1/22/17,4,131,131,,,NA,NA,1,NA,0,0,1,1 FD,0,1,1,0,1 FD,
21237,CC002,"336,337x338",0,1,0,9/13/16,9/13/16,10/10/16,3/8/17,5,176,176,,,NA,NA,4,4/10/17,1,3,0,,4,0,1,1,,
21237,CC002,"336,337x338",0,1,0,9/13/16,9/13/16,10/10/16,3/28/17,6,196,196,4/5/18,,NA,NA,4,4/28/17,3,1,0,,4,0,2,2,,
21237,CC002,"337,338x339",0,1,0,8/26/16,8/26/16,10/3/16,11/4/16,1,70,70,11/7/16,,70,NA,5,11/29/16,2,3,0,,5,0,2,2,,
21237,CC002,"337,338x339",0,1,0,8/26/16,8/26/16,10/3/16,12/4/16,2,100,100,,,NA,NA,2,12/21/16,2,0,0,,2,0,1,1,,
21237,CC002,"337,338x339",0,1,0,8/26/16,8/26/16,10/3/16,12/10/16,3,106,106,,,NA,NA,4,1/9/17,3,1,0,,4,0,1,1,,
21237,CC002,"337,338x339",0,1,0,8/26/16,8/26/16,10/3/16,12/27/16,4,123,123,,,NA,NA,2,1/16/17,1,1,0,,2,0,1,1,,
21237,CC002,"337,338x339",0,1,0,8/26/16,8/26/16,10/3/16,1/8/17,5,135,135,,,NA,NA,3,1/30/17,0,1,2,missing,1,2,1,1,missing,
21237,CC002,"337,338x339",0,1,0,8/26/16,8/26/16,10/3/16,1/20/17,6,147,147,,,NA,NA,3,2/17/17,1,1,1,missing,2,1,1,1,missing,
21237,CC002,"337,338x339",0,1,0,8/26/16,8/26/16,10/3/16,2/1/17,7,159,159,,,NA,NA,1,2/21/17,0,0,1,missing,0,1,1,0,missing,
21237,CC002,"337,338x339",0,1,0,11/8/16,11/8/16,11/29/16,1/19/17,8,72,72,,,NA,NA,6,2/17/17,2,2,2,missing,4,2,1,1,missing,
21237,CC002,"337,338x339",0,1,0,11/8/16,11/8/16,11/29/16,2/11/17,9,95,95,,,NA,NA,2,3/6/17,1,1,0,,2,0,1,1,,
21237,CC002,"337,338x339",0,1,0,11/8/16,11/8/16,11/29/16,3/29/17,10,141,141,,,NA,NA,1,4/17/17,0,1,0,,1,0,1,1,,
21237,CC002,"337,338x339",0,1,0,11/8/16,11/8/16,11/29/16,4/2/17,11,145,145,,,NA,NA,1,4/28/17,1,0,0,,1,0,1,1,,
21237,CC002,"337,338x339",0,1,0,11/8/16,11/8/16,11/29/16,5/21/17,12,194,194,,,NA,NA,4,NA,0,4,0,,4,0,1,1,,
21237,CC002,"337,338x339",0,1,0,11/8/16,11/8/16,11/29/16,5/25/17,13,198,198,,,NA,NA,3,6/12/17,1,1,1,missing,2,1,1,1,missing,
21237,CC002,"337,338x339",0,1,0,11/8/16,11/8/16,11/29/16,5/31/17,14,204,204,,,NA,NA,2,6/19/17,1,1,0,,2,0,1,1,,
21237,CC002,"337,338x339",0,1,0,11/8/16,11/8/16,11/29/16,6/16/17,15,220,220,,,NA,NA,2,NA,0,0,2,missing; 351 AH 7/10/17,0,2,1,0,missing; 351 AH 7/10/17,
21236,CC002,"337,338x339",0,1,0,12/13/16,12/13/16,1/9/17,2/23/17,16,72,72,,,NA,NA,3,3/20/17,1,2,0,0,3,0,1,1,,
21236,CC002,"337,338x339",0,1,0,12/13/16,12/13/16,1/9/17,4/27/17,17,135,135,,,NA,NA,4,5/22/17,1,2,NA,NA,3,1,1,1,,
21236,CC002,"337,338x339",0,1,0,12/13/16,12/13/16,1/9/17,6/1/17,18,170,170,,,NA,NA,3,6/19/17,1,2,0,0,3,0,1,1,,
21237,CC002,"339,340x341",0,1,0,9/12/16,9/12/16,10/10/16,11/25/16,1,74,74,11/28/16,,74,NA,8,12/19/16,3,3,2,2 missing,6,2,2,2,2 missing,
21237,CC002,"339,340x341",0,1,0,9/12/16,9/12/16,10/10/16,12/17/16,2,96,96,,,NA,NA,8,1/9/17,2,5,1,1 missing,7,1,1,1,1 missing,
21237,CC002,"339,340x341",0,1,0,9/12/16,9/12/16,10/10/16,2/23/17,3,164,164,,,NA,NA,6,3/13/17,5,1,0,,6,0,1,1,,
21237,CC002,"339,340x341",0,1,0,9/12/16,9/12/16,10/10/16,4/6/17,4,206,206,,,NA,NA,1,4/28/17,1,0,0,,1,0,1,1,,
21237,CC002,"339,340x341",0,1,0,9/12/16,9/12/16,10/10/16,4/14/17,5,214,214,,,NA,NA,2,5/1/17,0,2,0,,2,0,1,1,,
21237,CC002,"339,340x341",0,1,0,9/12/16,9/12/16,10/10/16,4/28/17,6,228,228,,,NA,NA,4,NA,0,0,4,missing,0,4,1,0,missing,
21237,CC002,"339,340x341",0,1,0,9/12/16,9/12/16,10/10/16,5/5/17,7,235,235,,,NA,NA,3,5/30/17,2,1,0,,3,0,1,1,,
21237,CC002,"339,340x341",0,1,0,9/12/16,9/12/16,10/10/16,5/8/17,8,238,238,,,NA,NA,1,NA,0,0,1,,0,1,1,0,,
21237,CC002,"339,340x341",0,1,0,9/12/16,9/12/16,10/10/16,5/19/17,9,249,249,,,NA,NA,1,NA,0,0,1,,0,1,1,0,,
21237,CC002,"340,341x342",0,1,0,10/15/16,10/15/16,11/11/16,12/30/16,1,76,76,,,76,NA,3,1/16/17,0,3,0,,3,0,1,1,,
21237,CC002,"340,341x342",0,1,0,10/15/16,10/15/16,11/11/16,1/1/17,2,78,78,,,NA,NA,9,1/29/17,6,3,0,,9,0,1,1,,
21237,CC002,"340,341x342",0,1,0,10/15/16,10/15/16,11/11/16,3/9/17,3,145,145,,,NA,NA,2,NA,0,0,2,missing,0,2,1,0,missing,
21237,CC002,"340,341x342",0,1,0,10/15/16,10/15/16,11/11/16,4/15/17,4,182,182,,,NA,NA,7,5/15/17,4,2,1,,6,1,1,1,,
21237,CC002,"343,344x345",0,1,0,10/13/16,10/13/16,11/11/16,2/8/17,1,118,118,,,118,NA,1,NA,0,0,1,missing,0,1,1,0,missing,
21237,CC002,"343,344x345",0,1,0,10/13/16,10/13/16,11/11/16,2/16/17,2,126,126,,,NA,NA,2,3/6/17,1,0,1,,1,1,1,1,,
21237,CC002,"343,344x345",0,1,0,10/13/16,10/13/16,11/11/16,4/5/17,3,174,174,,,NA,NA,1,NA,0,0,1,missing,0,1,1,0,missing,
21237,CC002,345x346,1,0,0,9/13/16,9/13/16,10/10/16,11/29/16,1,77,77,,,77,NA,4,12/19/16,2,2,0,,4,0,1,1,,
21237,CC002,345x346,1,0,0,9/13/16,9/13/16,10/10/16,12/24/16,2,102,102,,,NA,25,4,1/16/17,0,4,0,,4,0,1,1,,
21237,CC002,345x346,1,0,0,9/13/16,9/13/16,10/10/16,2/6/17,3,146,146,,,NA,44,3,NA,0,0,3,missing,0,3,1,0,missing,
21237,CC002,345x346,1,0,0,9/13/16,9/13/16,10/10/16,3/16/17,4,184,184,,,NA,38,4,4/10/17,1,3,0,,4,0,1,1,,
21237,CC002,345x346,1,0,0,9/13/16,9/13/16,10/10/16,4/10/17,5,209,209,,,NA,25,3,5/1/17,3,0,0,,3,0,1,1,,
21237,CC002,"346,347x348",0,1,0,9/27/16,9/27/16,11/11/16,12/4/16,1,68,68,,,68,NA,7,12/27/16,4,2,1,,6,1,1,1,,
21237,CC002,"346,347x348",0,1,0,9/27/16,9/27/16,11/11/16,12/17/16,2,81,81,,,NA,NA,6,1/9/17,3,3,0,,6,0,1,1,,
21237,CC002,"346,347x348",0,1,0,9/27/16,9/27/16,11/11/16,1/31/17,3,126,126,,,NA,NA,7,2/22/17,2,3,2,,5,2,1,1,,
21237,CC002,"346,347x348",0,1,0,9/27/16,9/27/16,11/11/16,2/7/17,4,133,133,,,NA,NA,4,2/27/17,1,2,1,LNR,3,1,1,1,LNR,
21237,CC002,"346,347x348",0,1,0,9/27/16,9/27/16,11/11/16,4/26/17,5,211,211,,,NA,NA,3,5/15/17,2,1,0,,3,0,1,1,,
21236,CC002,"346,347x348",0,1,0,12/20/16,12/20/16,1/9/17,3/5/17,6,75,75,,,NA,NA,7,3/27/17,5,1,1,0,6,1,1,1,,
21236,CC002,"346,347x348",0,1,0,12/20/16,12/20/16,1/9/17,5/1/17,7,132,132,,,NA,NA,5,5/22/17,2,3,0,0,5,0,1,1,,
21237,CC002,"347,348x349",0,1,0,9/27/16,9/27/16,10/17/16,12/8/16,1,72,72,,,72,NA,5,NA,0,0,5,3 FD; missing,0,5,1,0,3 FD; missing,
21237,CC002,"347,348x349",0,1,0,9/27/16,9/27/16,10/17/16,1/29/17,2,124,124,,,NA,NA,1,NA,0,0,1,1 missing,0,1,1,0,1 missing,
21237,CC002,"347,348x349",0,1,0,9/27/16,9/27/16,10/17/16,2/19/17,3,145,145,,,NA,NA,4,3/17/17,1,2,1,,3,1,1,1,,
21237,CC002,"347,348x349",0,1,0,9/27/16,9/27/16,10/17/16,3/26/17,4,180,180,,,NA,NA,5,4/17/17,3,1,1,1 missing,4,1,1,1,1 missing,
21237,CC002,"350,351x353",0,1,0,9/27/16,9/27/16,10/17/16,12/8/16,1,72,72,,,72,NA,6,12/27/16,2,3,1,,5,1,1,1,,
21237,CC002,"350,351x353",0,1,0,9/27/16,9/27/16,10/17/16,1/25/17,2,120,120,,,NA,NA,3,2/20/17,1,2,0,,3,0,1,1,,
21237,CC002,"350,351x353",0,1,0,9/27/16,9/27/16,10/17/16,3/27/17,3,181,181,,,NA,NA,5,4/17/17,2,3,0,350 circling 11/22/16,5,0,1,1,350 circling 11/22/16,
21236,CC002,"352,353x354",0,1,0,10/25/16,10/25/16,11/2/16,1/4/17,1,71,71,,,71,NA,3,2/17/17,0,2,1,1 FD,2,1,1,1,1 FD,
21237,CC002,"353,354,355x356",0,0,1,9/27/16,9/27/16,10/17/16,12/11/16,1,75,75,,,75,NA,5,1/9/17,3,1,1,1 missing,4,1,1,1,1 missing,
21237,CC002,"353,354,355x356",0,0,1,9/27/16,9/27/16,10/17/16,12/30/16,2,94,94,,,NA,NA,3,1/16/17,2,1,0,,3,0,1,1,,
21237,CC002,"353,354,355x356",0,0,1,9/27/16,9/27/16,10/17/16,1/2/17,3,97,97,,,NA,NA,2,1/23/17,1,1,0,,2,0,1,1,,
21237,CC002,"353,354,355x356",0,0,1,9/27/16,9/27/16,10/17/16,1/17/17,4,112,112,,,NA,NA,1,NA,0,0,1,missing,0,1,1,0,missing,
21237,CC002,"353,354,355x356",0,0,1,9/27/16,9/27/16,10/17/16,1/19/17,5,114,114,,,NA,NA,5,2/20/17,1,4,0,,5,0,1,1,,
21237,CC002,"353,354,355x356",0,0,1,9/27/16,9/27/16,10/17/16,2/6/17,6,132,132,,,NA,NA,2,NA,0,0,2,2 missing,0,2,1,0,2 missing,
21237,CC002,"353,354,355x356",0,0,1,9/27/16,9/27/16,10/17/16,2/12/17,7,138,138,,,NA,NA,5,3/6/17,2,3,0,,5,0,1,1,,
21237,CC002,"353,354,355x356",0,0,1,9/27/16,9/27/16,10/17/16,3/19/17,8,173,173,,,NA,NA,2,4/10/17,1,1,0,,2,0,1,1,,
21237,CC002,"357,358x359",0,1,0,10/18/16,10/18/16,11/9/16,1/10/17,1,84,84,,,84,NA,5,1/30/17,1,4,0,,5,0,1,1,,
21237,CC002,"357,358x359",0,1,0,10/18/16,10/18/16,11/9/16,2/1/17,2,106,106,,,NA,NA,4,2/20/17,3,1,0,,4,0,1,1,,
21237,CC002,"357,358x359",0,1,0,10/18/16,10/18/16,11/9/16,3/4/17,3,137,137,,,NA,NA,3,3/27/17,1,2,0,,3,0,1,1,,
21237,CC002,"357,358x359",0,1,0,10/18/16,10/18/16,11/9/16,3/31/17,4,164,164,,,NA,NA,5,4/28/17,2,3,0,,5,0,1,1,,
21237,CC002,"357,358x359",0,1,0,10/18/16,10/18/16,11/9/16,5/26/17,5,220,220,,,NA,NA,4,6/12/17,2,2,0,,4,0,1,1,,
21237,CC002,"357,358x359",0,1,0,10/18/16,10/18/16,11/9/16,6/15/17,6,240,240,,,NA,NA,3,7/17/17,1,2,0,,3,0,1,1,,
21237,CC002,"360,361x362",0,1,0,10/11/16,10/11/16,11/9/16,12/20/16,1,70,70,,,70,NA,3,1/9/17,0,2,1,1 missing,2,1,1,1,1 missing,
21237,CC002,"360,361x362",0,1,0,10/11/16,10/11/16,11/9/16,12/31/16,2,81,81,,,NA,NA,4,1/23/17,3,1,0,,4,0,1,1,,
21237,CC002,"360,361x362",0,1,0,10/11/16,10/11/16,11/9/16,1/22/17,3,103,103,,,NA,NA,8,2/20/17,2,4,2,2 missing,6,2,1,1,2 missing,
21237,CC002,"360,361x362",0,1,0,10/11/16,10/11/16,11/9/16,2/25/17,4,137,137,,,NA,NA,3,3/27/17,0,3,0,,3,0,1,1,,
21237,CC002,"360,361x362",0,1,0,10/11/16,10/11/16,11/9/16,3/12/17,5,152,152,,,NA,NA,7,4/10/17,2,5,0,,7,0,1,1,,
21237,CC002,"360,361x362",0,1,0,10/11/16,10/11/16,11/9/16,4/10/17,6,181,181,,,NA,NA,5,5/1/17,2,2,1,,4,1,1,1,,
21237,CC002,"360,361x362",0,1,0,10/11/16,10/11/16,11/9/16,4/27/17,7,198,198,,,NA,NA,1,5/15/17,0,0,1,,0,1,1,0,,
21237,CC002,"360,361x362",0,1,0,10/11/16,10/11/16,11/9/16,6/2/17,8,234,234,,,NA,NA,4,6/26/17,3,1,0,,4,0,1,1,,
21237,CC002,"360,361x362",0,1,0,10/11/16,10/11/16,11/9/16,6/13/17,9,245,245,,,NA,NA,2,7/3/17,1,0,1,1 BD,1,1,1,1,1 BD,
21236,CC002,"361,362x363",0,1,0,1/3/17,1/3/17,1/23/17,3/7/17,1,63,63,,,63,NA,4,3/21/17,1,3,0,0,4,0,1,1,,
21236,CC002,"361,362x363",0,1,0,1/3/17,1/3/17,1/23/17,3/26/17,2,82,82,3/30/17,,NA,NA,8,4/11/17,3,2,NA,NA,5,3,2,2,2 FD,
21236,CC002,"361,362x363",0,1,0,1/3/17,1/3/17,1/23/17,4/17/17,3,104,104,4/23/17,,NA,NA,5,5/15/17,2,2,NA,NA,4,1,2,2,,
21236,CC002,"361,362x363",0,1,0,1/3/17,1/3/17,1/23/17,5/7/17,4,124,124,,,NA,NA,6,5/30/17,1,4,NA,NA,5,1,1,1,1 missing pup,
21236,CC002,"361,362x363",0,1,0,1/3/17,1/3/17,1/23/17,7/28/17,5,206,206,,,NA,NA,3,NA,NA,NA,NA,NA,NA,NA,1,0,,
21237,CC002,"363,364x365",0,1,0,10/18/16,10/18/16,11/9/16,1/10/17,1,84,84,,,84,NA,4,2/17/17,0,4,0,,4,0,1,1,,
21237,CC002,"363,364x365",0,1,0,10/18/16,10/18/16,11/9/16,1/16/17,2,90,90,,,NA,NA,2,NA,0,0,2,missing,0,2,1,0,missing,
21237,CC002,"363,364x365",0,1,0,10/18/16,10/18/16,11/9/16,3/13/17,3,146,146,,,NA,NA,7,4/10/17,2,5,0,,7,0,1,1,,
21237,CC002,"363,364x365",0,1,0,10/18/16,10/18/16,11/9/16,4/6/17,4,170,170,,,NA,NA,4,4/28/17,1,3,0,,4,0,1,1,,
21237,CC002,"363,364x365",0,1,0,10/18/16,10/18/16,11/9/16,4/16/17,5,180,180,,,NA,NA,1,NA,0,0,1,1 FD,0,1,1,0,1 FD,
21237,CC002,"363,364x365",0,1,0,10/18/16,10/18/16,11/9/16,5/24/17,6,218,218,,,NA,NA,4,6/12/17,1,2,1,missing,3,1,1,1,missing,
21236,CC002,"364,365X366",0,1,0,1/3/17,1/3/17,1/23/17,3/19/17,1,75,75,,,75,NA,5,4/10/17,3,2,0,0,5,0,1,1,,
21236,CC002,"364,365X366",0,1,0,1/3/17,1/3/17,1/23/17,4/1/17,2,88,88,,,NA,NA,5,4/28/17,3,2,0,0,5,0,1,1,,
21236,CC002,"364,365X366",0,1,0,1/3/17,1/3/17,1/23/17,4/16/17,3,103,103,,,NA,NA,2,5/25/17,2,0,0,0,2,0,1,1,,
21236,CC002,"364,365X366",0,1,0,1/3/17,1/3/17,1/23/17,6/5/17,4,153,153,,,NA,NA,2,6/26/17,0,2,0,0,2,0,1,1,,
21236,CC002,"364,365X366",0,1,0,1/3/17,1/3/17,1/23/17,6/21/17,5,169,169,,,NA,NA,2,7/17/17,2,0,0,0,2,0,1,1,,
21236,CC002,"364,365X366",0,1,0,1/3/17,1/3/17,1/23/17,6/28/17,6,176,176,,,NA,NA,2,7/17/17,2,0,0,0,2,0,1,1,,
21237,CC002,"366,367x368",0,1,0,10/18/16,10/18/16,11/9/16,12/26/16,1,69,69,,,69,NA,1,1/16/17,0,1,0,,1,0,1,1,,
21237,CC002,"366,367x368",0,1,0,10/18/16,10/18/16,11/9/16,1/2/17,2,76,76,,,NA,NA,3,1/23/17,1,2,0,,3,0,1,1,,
21237,CC002,"366,367x368",0,1,0,10/18/16,10/18/16,11/9/16,1/14/17,3,88,88,,,NA,NA,2,NA,0,0,2,,0,2,1,0,,
21237,CC002,"366,367x368",0,1,0,10/18/16,10/18/16,11/9/16,1/23/17,4,97,97,,,NA,NA,2,NA,0,0,2,missing,0,2,1,0,missing,
21237,CC002,"366,367x368",0,1,0,10/18/16,10/18/16,11/9/16,3/3/17,5,136,136,,,NA,NA,3,3/27/17,2,1,0,,3,0,1,1,,
21237,CC002,"366,367x368",0,1,0,10/18/16,10/18/16,11/9/16,3/14/17,6,147,147,,,NA,NA,5,NA,0,0,5,missing,0,5,1,0,missing,
21237,CC002,"366,367x368",0,1,0,10/18/16,10/18/16,11/9/16,5/5/17,7,199,199,,,NA,NA,5,5/22/17,3,2,0,,5,0,1,1,,
21237,CC002,"366,367x368",0,1,0,10/18/16,10/18/16,11/9/16,5/15/17,8,209,209,,,NA,NA,1,6/5/17,0,0,1,missing,0,1,1,0,missing,
21237,CC002,"366,367x368",0,1,0,10/18/16,10/18/16,11/9/16,5/28/17,9,222,222,,,NA,NA,4,6/19/17,2,2,0,,4,0,1,1,,
21237,CC002,"367,368x369",0,1,0,1/3/17,1/3/17,1/23/17,3/9/17,1,65,65,,,65,NA,8,3/27/17,3,3,2,,6,2,1,1,,
21237,CC002,"367,368x369",0,1,0,1/3/17,1/3/17,1/23/17,3/17/17,2,73,73,,,NA,NA,3,4/10/17,2,1,0,1 FD,3,0,1,1,1 FD,
21237,CC002,"367,368x369",0,1,0,1/3/17,1/3/17,1/23/17,4/3/17,3,90,90,,,NA,NA,2,4/28/17,1,1,0,,2,0,1,1,,
21237,CC002,"367,368x369",0,1,0,1/3/17,1/3/17,1/23/17,6/8/17,4,156,156,,,NA,NA,4,6/20/17,1,1,2,,2,2,1,1,,
21237,CC002,"367,368x369",0,1,0,1/3/17,1/3/17,1/23/17,6/23/17,5,171,171,,,NA,NA,5,7/17/17,3,2,0,,5,0,1,1,,
21237,CC002,"369,370x371",0,1,0,11/8/16,11/8/16,12/5/16,1/23/17,1,76,76,,,76,NA,4,2/20/17,1,2,NA,NA,3,1,1,1,,
21237,CC002,"369,370x371",0,1,0,11/8/16,11/8/16,12/5/16,2/14/17,2,98,98,,,NA,NA,4,3/6/17,2,2,0,0,4,0,1,1,,
21237,CC002,"369,370x371",0,1,0,11/8/16,11/8/16,12/5/16,4/7/17,3,150,150,,,NA,NA,3,4/28/17,0,3,0,0,3,0,1,1,,
21237,CC002,"369,370x371",0,1,0,11/8/16,11/8/16,12/5/16,5/1/17,4,174,174,,,NA,NA,1,5/22/17,NA,NA,NA,NA,NA,NA,1,0,missing pup,
21237,CC002,"369,370x371",0,1,0,11/8/16,11/8/16,12/5/16,5/30/17,5,203,203,,,NA,NA,4,6/19/17,0,1,NA,NA,1,3,1,1,,
21237,CC002,"369,370x371",0,1,0,11/8/16,11/8/16,12/5/16,6/21/17,6,225,225,,,NA,NA,4,7/17/17,3,1,0,0,4,0,1,1,,
21237,CC002,"369,370x371",0,1,0,11/8/16,11/8/16,12/5/16,7/13/17,7,247,247,,,NA,NA,3,8/7/17,1,2,0,0,3,0,1,1,,
21237,CC002,"370,371x372",0,1,0,1/3/17,1/3/17,1/23/17,3/12/17,1,68,68,,,68,NA,4,4/10/17,1,1,2,missing,2,2,1,1,missing,
21237,CC002,"370,371x372",0,1,0,1/3/17,1/3/17,1/23/17,4/4/17,2,91,91,,,NA,NA,2,4/28/17,1,1,0,,2,0,1,1,,
21237,CC002,"370,371x372",0,1,0,1/3/17,1/3/17,1/23/17,4/20/17,3,107,107,,,NA,NA,3,5/15/17,3,0,0,,3,0,1,1,,
21237,CC002,"370,371x372",0,1,0,1/3/17,1/3/17,1/23/17,5/28/17,4,145,145,,,NA,NA,2,6/19/17,2,0,0,,2,0,1,1,,
21237,CC002,"370,371x372",0,1,0,1/3/17,1/3/17,1/23/17,6/18/17,5,166,166,,,NA,NA,3,NA,0,0,3,,0,3,1,0,,
21237,CC002,"370,371x372",0,1,0,1/3/17,1/3/17,1/23/17,7/7/17,6,185,185,,,NA,NA,4,NA,0,0,4,,0,4,1,0,,
21236,CC002,"373,374x375",0,1,0,12/6/16,12/6/16,1/23/17,2/14/17,1,70,70,,,70,NA,5,3/6/17,3,2,0,0,5,0,1,1,,
21236,CC002,"373,374x375",0,1,0,12/6/16,12/6/16,1/23/17,2/26/17,2,82,82,,,NA,NA,5,3/20/17,2,3,0,0,5,0,1,1,,
21236,CC002,"373,374x375",0,1,0,12/6/16,12/6/16,1/23/17,3/25/17,3,109,109,,,NA,NA,2,4/17/17,1,1,0,0,2,0,1,1,,
21236,CC002,"373,374x375",0,1,0,12/6/16,12/6/16,1/23/17,4/1/17,4,116,116,,,NA,NA,2,4/17/17,0,2,0,0,2,0,1,1,,
21236,CC002,"373,374x375",0,1,0,12/6/16,12/6/16,1/23/17,4/16/17,5,131,131,,,NA,NA,1,5/15/17,NA,NA,NA,NA,NA,NA,1,0,missing pup,
21236,CC002,"373,374x375",0,1,0,12/6/16,12/6/16,1/23/17,5/7/17,6,152,152,,,NA,NA,3,5/30/17,1,2,0,0,3,0,1,1,,
21236,CC002,"373,374x375",0,1,0,12/6/16,12/6/16,1/23/17,5/19/17,7,164,164,,,NA,NA,6,6/12/17,4,2,0,0,6,0,1,1,,
21236,CC002,"373,374x375",0,1,0,12/6/16,12/6/16,1/23/17,6/25/17,8,201,201,,,NA,NA,5,7/17/17,2,3,0,0,5,0,1,1,,
21237,CC002,"375,376x377",0,1,0,11/1/16,11/1/16,12/5/16,1/10/17,1,70,70,,,70,NA,2,NA,0,0,2,missing,0,2,1,0,missing,
21237,CC002,"375,376x377",0,1,0,11/1/16,11/1/16,12/5/16,2/3/17,2,94,94,,,NA,NA,2,2/27/17,1,1,0,,2,0,1,1,,
21237,CC002,"375,376x377",0,1,0,11/1/16,11/1/16,12/5/16,2/14/17,3,105,105,,,NA,NA,4,3/6/17,3,0,1,1 FD,3,1,1,1,1 FD,
21237,CC002,"375,376x377",0,1,0,11/1/16,11/1/16,12/5/16,3/17/17,4,136,136,,,NA,NA,8,4/10/17,6,2,0,,8,0,1,1,,
21237,CC002,"375,376x377",0,1,0,11/1/16,11/1/16,12/5/16,4/23/17,5,173,173,,,NA,NA,2,5/15/17,0,2,0,,2,0,1,1,,
21237,CC002,"375,376x377",0,1,0,11/1/16,11/1/16,12/5/16,5/16/17,6,196,196,,,NA,NA,3,6/5/17,3,0,0,,3,0,1,1,,
21237,CC002,"375,376x377",0,1,0,11/1/16,11/1/16,12/5/16,5/22/17,7,202,202,,,NA,NA,3,NA,0,0,3,missing,0,3,1,0,missing,
21237,CC002,"375,376x377",0,1,0,11/1/16,11/1/16,12/5/16,5/25/17,8,205,205,,,NA,NA,1,NA,0,0,1,missing,0,1,1,0,missing,
21236,CC002,"376,377x378",0,1,0,12/6/16,12/6/16,1/23/17,2/16/17,1,72,72,,,72,NA,7,3/7/17,6,1,0,0,7,0,1,1,male FD 8/1/17,
21236,CC002,"376,377x378",0,1,0,12/6/16,12/6/16,1/23/17,2/23/17,2,79,79,,,NA,NA,2,3/20/17,2,0,0,0,2,0,1,1,male FD 8/1/17,
21236,CC002,"376,377x378",0,1,0,12/6/16,12/6/16,1/23/17,3/19/17,3,103,103,,,NA,NA,3,4/10/17,1,2,0,0,3,0,1,1,male FD 8/1/17,
21236,CC002,"376,377x378",0,1,0,12/6/16,12/6/16,1/23/17,4/19/17,4,134,134,,,NA,NA,2,5/15/17,NA,NA,NA,NA,NA,NA,1,0,missing pups; male FD 8/1/17,
21236,CC002,"376,377x378",0,1,0,12/6/16,12/6/16,1/23/17,5/11/17,5,156,156,,,NA,NA,3,6/5/17,1,2,0,0,3,0,1,1,male FD 8/1/17,
21236,CC002,"376,377x378",0,1,0,12/6/16,12/6/16,1/23/17,6/7/17,6,183,183,,,NA,NA,5,6/26/17,4,2,0,0,6,-1,1,1,male FD 8/1/17,
21236,CC002,"376,377x378",0,1,0,12/6/16,12/6/16,1/23/17,7/6/17,7,212,212,,,NA,NA,2,7/28/17,1,1,0,0,2,0,1,1,male FD 8/1/17,
21236,CC002,"376,377x378",0,1,0,12/6/16,12/6/16,1/23/17,7/26/17,8,232,232,,,NA,NA,2,NA,NA,NA,NA,NA,NA,NA,1,0,male FD 8/1/17,
21237,CC002,"378,379x380",0,1,0,10/25/16,10/25/16,12/5/16,1/10/17,1,77,77,,,77,NA,4,NA,0,0,4,1 FD; 3 missing,0,4,1,0,1 FD; 3 missing,
21237,CC002,"378,379x380",0,1,0,10/25/16,10/25/16,12/5/16,1/24/17,2,91,91,,,NA,NA,4,2/20/17,1,3,0,,4,0,1,1,,
21237,CC002,"378,379x380",0,1,0,10/25/16,10/25/16,12/5/16,2/19/17,3,117,117,,,NA,NA,4,3/13/17,2,2,0,,4,0,1,1,,
21237,CC002,"378,379x380",0,1,0,10/25/16,10/25/16,12/5/16,3/4/17,4,130,130,,,NA,NA,1,NA,0,0,1,missing,0,1,1,0,missing,
21236,CC002,379x380,1,0,0,2/7/17,2/7/17,2/27/17,4/11/17,1,63,63,,,63,NA,4,5/1/17,3,1,0,0,4,0,1,1,,
21236,CC002,379x380,1,0,0,2/7/17,2/7/17,2/27/17,5/26/17,2,108,108,,,NA,45,2,6/12/17,2,0,0,0,2,0,1,1,,
21236,CC002,379x380,1,0,0,2/7/17,2/7/17,2/27/17,6/18/17,3,131,131,,,NA,23,3,7/17/17,1,2,0,0,3,0,1,1,,
21236,CC002,379x380,1,0,0,2/7/17,2/7/17,2/27/17,7/12/17,4,155,155,,,NA,24,1,8/1/17,NA,NA,NA,NA,NA,NA,1,0,missing pup,
21237,CC002,"381,382x383",0,1,0,11/29/16,11/29/16,12/19/16,3/18/17,1,109,109,,,109,NA,3,4/10/17,0,3,0,,3,0,1,1,,
21237,CC002,"381,382x383",0,1,0,11/29/16,11/29/16,12/19/16,4/20/17,2,142,142,,,NA,NA,5,5/15/17,3,2,0,,5,0,1,1,,
21237,CC002,"381,382x383",0,1,0,11/29/16,11/29/16,12/19/16,5/8/17,3,160,160,,,NA,NA,1,NA,0,0,1,missing,0,1,1,0,missing,
21237,CC002,"381,382x383",0,1,0,11/29/16,11/29/16,12/19/16,6/11/17,4,194,194,,,NA,NA,2,NA,0,0,2,missing,0,2,1,0,missing,
21237,CC002,"381,382x383",0,1,0,11/29/16,11/29/16,12/19/16,7/3/17,5,216,216,,,NA,NA,1,7/24/17,0,1,0,,1,0,1,1,,
21236,CC002,"381,382x383",0,1,0,1/31/17,1/31/17,2/27/17,4/7/17,6,66,66,,,NA,NA,15,5/1/17,5,9,,,14,1,1,1,,
21236,CC002,"381,382x383",0,1,0,1/31/17,1/31/17,2/27/17,6/4/17,7,124,124,,,NA,NA,3,6/26/17,0,3,,,3,0,1,1,,
21236,CC002,"381,382x383",0,1,0,1/31/17,1/31/17,2/27/17,6/25/17,8,145,145,,,NA,NA,3,7/17/17,1,2,,,3,0,1,1,,
21236,CC002,"381,382x383",0,1,0,1/31/17,1/31/17,2/27/17,6/30/17,9,150,150,,,NA,NA,2,7/17/17,0,2,,,2,0,1,1,,
21236,CC002,"381,382x383",0,1,0,1/31/17,1/31/17,2/27/17,7/23/17,10,173,173,,,NA,NA,1,NA,0,0,,,0,1,1,0,missing ,
21236,CC002,"381,382x383",0,1,0,1/31/17,1/31/17,2/27/17,8/5/17,11,186,186,,,NA,NA,3,8/29/17,0,2,,,2,1,1,1,1 found dead,
21236,CC002,"381,382x383",0,1,0,1/31/17,1/31/17,2/27/17,8/11/17,12,192,192,,,NA,NA,1,8/29/17,1,0,,,1,0,1,1,,
21236,CC002,"381,382x383",0,1,0,1/31/17,1/31/17,2/27/17,8/28/17,13,209,209,,,NA,NA,3,8/29/17,0,0,,,0,3,1,0,missing,
21237,CC002,"384,385x386",0,1,0,11/29/16,11/29/16,12/19/16,4/8/17,1,130,130,,,130,NA,5,5/8/17,2,1,2,2 missing,3,2,1,1,2 missing,
21237,CC002,"384,385x386",0,1,0,11/29/16,11/29/16,12/19/16,4/17/17,2,139,139,,,NA,NA,1,NA,0,0,1,,0,1,1,0,,
21237,CC002,"384,385x386",0,1,0,11/29/16,11/29/16,12/19/16,5/4/17,3,156,156,,,NA,NA,3,5/22/17,3,0,0,,3,0,1,1,,
21237,CC002,"384,385x386",0,1,0,11/29/16,11/29/16,12/19/16,5/9/17,4,161,161,,,NA,NA,1,NA,0,0,1,missing,0,1,1,0,missing,
21237,CC002,"384,385x386",0,1,0,11/29/16,11/29/16,12/19/16,5/27/17,5,179,179,,,NA,NA,4,6/19/17,1,3,0,,4,0,1,1,,
21236,CC002,"384,385x386",0,1,0,2/14/17,2/14/17,3/6/17,4/26/17,6,71,71,4/28/17,,NA,NA,11,5/22/17,3,6,,,9,2,2,2,,
21236,CC002,"384,385x386",0,1,0,2/14/17,2/14/17,3/6/17,5/22/17,7,97,97,,,NA,NA,2,6/12/17,1,1,,,2,0,1,1,,
21236,CC002,"384,385x386",0,1,0,2/14/17,2/14/17,3/6/17,6/23/17,8,129,129,,,NA,NA,2,7/17/17,1,1,,,2,0,1,1,,
21236,CC002,"384,385x386",0,1,0,2/14/17,2/14/17,3/6/17,7/6/17,9,142,142,,,NA,NA,6,7/28/17,4,2,,,6,0,1,1,,
21236,CC002,"384,385x386",0,1,0,2/14/17,2/14/17,3/6/17,7/28/17,10,164,164,,,NA,NA,4,8/15/17,2,2,,,4,0,1,1,,
21236,CC002,"384,385x386",0,1,0,2/14/17,2/14/17,3/6/17,8/12/17,11,179,179,,,NA,NA,6,9/6/17,1,5,,,6,0,1,1,,
21236,CC002,"384,385x386",0,1,0,2/14/17,2/14/17,3/6/17,9/3/17,12,201,201,,,NA,NA,6,9/26/17,0,4,,,4,2,1,1,2 FD,
21236,CC002,"384,385x386",0,1,0,2/14/17,2/14/17,3/6/17,10/5/17,13,233,233,,,NA,NA,5,NA,NA,NA,,,NA,0,1,0,384 and 386 FD 10/7/17,
21237,CC002,"387,388x389",0,1,0,11/22/16,11/22/16,12/19/16,2/20/17,1,90,90,,,90,NA,6,NA,0,0,6,missing; 389 FD 1/3/17,0,6,1,0,missing; 389 FD 1/3/17,
21236,CC002,"387,388x389",0,1,0,2/10/17,2/10/17,3/6/17,4/23/17,2,72,72,4/27/17,,NA,NA,9,5/22/17,4,5,,,9,0,2,2,,
21236,CC002,"387,388x389",0,1,0,2/10/17,2/10/17,3/6/17,5/18/17,3,97,97,,,NA,NA,5,6/5/17,3,2,,,5,0,1,1,,
21236,CC002,"387,388x389",0,1,0,2/10/17,2/10/17,3/6/17,6/16/17,4,126,126,6/19/17,,NA,NA,10,7/17/17,6,4,,,10,0,2,2,,
21236,CC002,"387,388x389",0,1,0,2/10/17,2/10/17,3/6/17,8/7/17,5,178,178,,,NA,NA,2,8/29/17,0,2,,,2,0,1,1,,
21237,CC002,"390,391x392",0,1,0,11/29/16,11/29/16,12/19/16,3/17/17,1,108,108,3/23/17,,108,NA,6,4/10/17,4,1,NA,NA,5,1,2,2,,
21237,CC002,"390,391x392",0,1,0,11/29/16,11/29/16,12/19/16,4/9/17,2,131,131,,,NA,NA,1,4/28/17,0,1,0,0,1,0,1,1,,
21237,CC002,"390,391x392",0,1,0,11/29/16,11/29/16,12/19/16,4/11/17,3,133,133,,,NA,NA,7,5/16/17,0,3,NA,NA,3,4,1,1,,
21237,CC002,"390,391x392",0,1,0,11/29/16,11/29/16,12/19/16,4/28/17,4,150,150,,,NA,NA,5,5/1/17,NA,NA,NA,NA,NA,NA,1,0,missing pups,
21237,CC002,"390,391x392",0,1,0,11/29/16,11/29/16,12/19/16,5/19/17,5,171,171,,,NA,NA,2,6/12/17,1,0,NA,NA,1,1,1,1,,
21237,CC002,"390,391x392",0,1,0,11/29/16,11/29/16,12/19/16,5/24/17,6,176,176,,,NA,NA,5,6/26/17,2,0,NA,NA,2,3,1,1,,
21237,CC002,"390,391x392",0,1,0,11/29/16,11/29/16,12/19/16,6/10/17,7,193,193,,,NA,NA,4,NA,NA,NA,NA,NA,NA,NA,1,0,missing pups,
21236,CC002,"390,391x392",0,1,0,2/23/17,2/23/17,3/13/17,4/30/17,8,66,66,5/2/17,,NA,NA,6,5/22/17,3,3,,,6,0,2,2,,
21236,CC002,"390,391x392",0,1,0,2/23/17,2/23/17,3/13/17,5/22/17,9,88,88,,,NA,NA,7,6/12/17,2,5,,,7,0,1,1,,
21236,CC002,"390,391x392",0,1,0,2/23/17,2/23/17,3/13/17,6/14/17,10,111,111,,,NA,NA,3,7/3/17,1,1,,,2,1,1,1,,
21236,CC002,"390,391x392",0,1,0,2/23/17,2/23/17,3/13/17,6/23/17,11,120,120,,,NA,NA,5,7/17/17,2,3,,,5,0,1,1,,
21236,CC002,"390,391x392",0,1,0,2/23/17,2/23/17,3/13/17,7/7/17,12,134,134,,,NA,NA,5,7/28/17,1,1,,,2,3,1,1,3 missing,
21236,CC002,"390,391x392",0,1,0,2/23/17,2/23/17,3/13/17,7/15/17,13,142,142,,,NA,NA,1,8/8/17,1,0,,,1,0,1,1,,
21236,CC002,"390,391x392",0,1,0,2/23/17,2/23/17,3/13/17,7/29/17,14,156,156,,,NA,NA,8,8/22/17,6,2,,,8,0,1,1,,
21237,CC002,"393,394x395",0,1,0,12/20/16,12/20/16,1/9/17,3/6/17,1,76,76,,,76,NA,1,3/13/17,NA,NA,NA,NA,NA,NA,1,0,pup missing,
21237,CC002,"393,394x395",0,1,0,12/20/16,12/20/16,1/9/17,3/31/17,2,101,101,4/3/17,,NA,NA,9,4/28/17,3,2,NA,NA,5,4,2,2,3 missing pups,
21237,CC002,"393,394x395",0,1,0,12/20/16,12/20/16,1/9/17,5/19/17,3,150,150,,,NA,NA,2,6/5/17,2,0,0,0,2,0,1,1,,
21237,CC002,"393,394x395",0,1,0,12/20/16,12/20/16,1/9/17,6/1/17,4,163,163,,,NA,NA,6,6/19/17,1,1,NA,NA,2,4,1,1,3 missing pups,
21236,CC002,"393,394x395",0,1,0,4/1/17,4/1/17,4/28/17,6/13/17,5,73,73,,,NA,NA,4,7/3/17,2,2,,,4,0,1,1,,
21236,CC002,"393,394x395",0,1,0,4/1/17,4/1/17,4/28/17,6/18/17,6,78,78,,,NA,NA,3,7/17/17,1,2,,,3,0,1,1,,
21236,CC002,"393,394x395",0,1,0,4/1/17,4/1/17,4/28/17,7/3/17,7,93,93,,,NA,NA,4,7/28/17,2,2,,,4,0,1,1,,
21236,CC002,"393,394x395",0,1,0,4/1/17,4/1/17,4/28/17,7/12/17,8,102,102,,,NA,NA,6,8/8/17,4,2,,,6,0,1,1,,
21236,CC002,"393,394x395",0,1,0,4/1/17,4/1/17,4/28/17,8/11/17,9,132,132,,,NA,NA,1,9/6/17,0,1,,,1,0,1,1,,
21236,CC002,"393,394x395",0,1,0,4/1/17,4/1/17,4/28/17,9/1/17,10,153,153,9/3/17,,NA,NA,8,9/26/17,4,2,,,6,2,2,2,,
21236,CC002,"393,394x395",0,1,0,4/1/17,4/1/17,4/28/17,9/29/17,11,181,181,,,NA,NA,5,10/24/17,0,3,,,3,2,1,1,,
21236,CC002,"393,394x395",0,1,0,4/1/17,4/1/17,4/28/17,10/21/17,12,203,203,,,NA,NA,1,NA,0,0,,,0,1,1,0,,
21237,CC002,"396,397x398",0,1,0,12/13/16,12/13/16,1/9/17,2/19/17,1,68,68,,,68,NA,1,3/17/17,NA,NA,NA,NA,NA,NA,1,0,1 pup missing,
21237,CC002,"396,397x398",0,1,0,12/13/16,12/13/16,1/9/17,3/17/17,2,94,94,,,NA,NA,4,4/10/17,2,2,0,0,4,0,1,1,,
21237,CC002,"396,397x398",0,1,0,12/13/16,12/13/16,1/9/17,4/14/17,3,122,122,,,NA,NA,NA,5/1/17,0,1,NA,NA,1,NA,1,1,litter size illegible,
21237,CC002,"396,397x398",0,1,0,12/13/16,12/13/16,1/9/17,5/5/17,4,143,143,,,NA,NA,4,5/30/17,2,2,0,0,4,0,1,1,,
21237,CC002,"396,397x398",0,1,0,12/13/16,12/13/16,1/9/17,7/9/17,5,208,208,,,NA,NA,2,7/31/17,NA,NA,NA,NA,NA,NA,1,0,missing pups,
21237,CC002,"396,397x398",0,1,0,12/13/16,12/13/16,1/9/17,7/31/17,6,230,230,,,NA,NA,3,NA,NA,NA,NA,NA,NA,NA,1,0,male found dead 7/31/17,
21236,CC002,"396,397x398",0,1,0,4/26/17,4/26/17,5/15/17,7/2/17,7,67,67,,,NA,NA,5,7/28/17,3,2,,,5,0,1,1,,
21236,CC002,"396,397x398",0,1,0,4/26/17,4/26/17,5/15/17,7/22/17,8,87,87,7/25/17,,NA,NA,7,8/15/17,3,4,,,7,0,2,2,,
21236,CC002,"396,397x398",0,1,0,4/26/17,4/26/17,5/15/17,8/11/17,9,107,107,,,NA,NA,5,9/6/17,2,3,,,5,0,1,1,,
21236,CC002,"396,397x398",0,1,0,4/26/17,4/26/17,5/15/17,9/12/17,10,139,139,,,NA,NA,3,10/3/17,0,2,,,2,1,1,1,missing,
21236,CC002,"396,397x398",0,1,0,4/26/17,4/26/17,5/15/17,9/30/17,11,157,157,,,NA,NA,3,10/24/17,0,0,,,0,3,1,0,missing,
21236,CC002,"396,397x398",0,1,0,4/26/17,4/26/17,5/15/17,10/21/17,12,178,178,,,NA,NA,3,11/14/17,1,2,,,3,0,1,1,,
21237,CC002,"399,400x401",0,1,0,12/13/16,12/13/16,1/9/17,3/26/17,1,103,103,3/28/17,,103,NA,8,4/17/17,1,7,0,0,8,0,2,2,,
21237,CC002,"399,400x401",0,1,0,12/13/16,12/13/16,1/9/17,4/17/17,2,125,125,4/24/17,,NA,NA,9,5/15/17,1,3,NA,NA,4,5,2,2,"4 missing, 1 injured",
21237,CC002,"399,400x401",0,1,0,12/13/16,12/13/16,1/9/17,5/26/17,3,164,164,,,NA,NA,3,6/19/17,2,0,NA,NA,2,1,1,1,,
21237,CC002,"399,400x401",0,1,0,12/13/16,12/13/16,1/9/17,6/18/17,4,187,187,,,NA,NA,5,7/11/17,2,3,0,0,5,0,1,1,,
21236,CC002,"399,400x401",0,1,0,4/15/17,4/15/17,5/15/17,NA,5,NA,NA,,,NA,NA,0,NA,0,0,0,0,0,0,1,0,nonproductive 8/8/17,
21236,CC002,"4,5x6",0,1,0,4/5/16,4/5/16,5/5/16,NA,1,NA,NA,,,NA,NA,0,NA,0,0,,,0,0,1,0,nonproductive,
21237,CC002,"402,403x404",0,1,0,12/27/16,12/27/16,1/16/17,3/3/17,1,66,66,3/6/17,,66,NA,5,3/27/17,0,5,0,0,5,0,2,2,,
21237,CC002,"402,403x404",0,1,0,12/27/16,12/27/16,1/16/17,4/21/17,2,115,115,,,NA,NA,4,5/15/17,NA,NA,NA,NA,NA,NA,1,0,missing pups,
21237,CC002,"402,403x404",0,1,0,12/27/16,12/27/16,1/16/17,5/10/17,3,134,134,,,NA,NA,6,5/30/17,2,4,0,0,6,0,1,1,,
21237,CC002,"402,403x404",0,1,0,12/27/16,12/27/16,1/16/17,6/6/17,4,161,161,,,NA,NA,6,6/26/17,3,3,0,0,6,0,1,1,,
21237,CC002,"402,403x404",0,1,0,12/27/16,12/27/16,1/16/17,4/30/17,5,124,124,,,NA,NA,6,7/24/17,2,4,0,0,6,0,1,1,,
21236,CC002,"402,403x404",0,1,0,4/15/17,4/15/17,5/15/17,NA,6,NA,NA,,,NA,NA,0,NA,0,0,0,0,0,0,1,0,nonproductive 8/8/17,
21237,CC002,"405,406x407",0,1,0,2/12/17,2/12/17,3/6/17,5/1/17,1,78,78,,,78,NA,3,5/22/17,0,0,,,0,3,1,0,1 found dead; male retired with ear infection 8/21/17,
21237,CC002,"405,406x407",0,1,0,2/12/17,2/12/17,3/6/17,6/12/17,2,120,120,,,NA,NA,4,NA,0,0,,,0,4,1,0,4 found dead; male retired with ear infection 8/21/17,
21237,CC002,"405,406x407",0,1,0,2/12/17,2/12/17,3/6/17,7/6/17,3,144,144,,,NA,NA,1,7/17/17,0,0,,,0,1,1,0,missing; male retired with ear infection 8/21/17,
21237,CC002,"405,406x407",0,1,0,2/12/17,2/12/17,3/6/17,7/8/17,4,146,146,,,NA,NA,1,7/17/17,0,0,,,0,1,1,0,male retired with ear infection 8/21/17,
21237,CC002,"405,406x407",0,1,0,2/12/17,2/12/17,3/6/17,7/28/17,5,166,166,,,NA,NA,2,8/21/17,0,2,,,2,0,1,1,male retired with ear infection 8/21/17,
21237,CC002,"405,406x407",0,1,0,2/12/17,2/12/17,3/6/17,8/19/17,6,188,188,,,NA,NA,3,9/18/17,2,1,,,3,0,1,1,male retired with ear infection 8/21/17,
21236,CC002,"405,406x407",0,1,0,5/18/17,5/18/17,6/5/17,7/29/17,7,72,72,,,NA,NA,5,8/22/17,2,3,,,5,0,1,1,,
21236,CC002,"405,406x407",0,1,0,5/18/17,5/18/17,6/5/17,8/22/17,8,96,96,,,NA,NA,6,9/19/17,3,3,,,6,0,1,1,,
21236,CC002,"405,406x407",0,1,0,5/18/17,5/18/17,6/5/17,10/2/17,9,137,137,,,NA,NA,7,10/24/17,3,4,,,7,0,1,1,,
21236,CC002,"405,406x407",0,1,0,5/18/17,5/18/17,6/5/17,10/10/17,10,145,145,,,NA,NA,5,11/6/17,2,3,,,5,0,1,1,,
21236,CC002,"405,406x407",0,1,0,5/18/17,5/18/17,6/5/17,10/27/17,11,162,162,,,NA,NA,1,11/14/17,0,0,,,0,1,1,0,missing,
21237,CC002,"408,409x410",0,1,0,2/14/17,2/14/17,3/6/17,4/30/17,1,75,75,,,75,NA,3,5/22/17,0,3,,,3,0,1,1,,
21237,CC002,"408,409x410",0,1,0,2/14/17,2/14/17,3/6/17,5/22/17,2,97,97,,,NA,NA,3,6/12/17,1,2,,,3,0,1,1,,
21237,CC002,"408,409x410",0,1,0,2/14/17,2/14/17,3/6/17,5/30/17,3,105,105,,,NA,NA,1,6/19/17,0,1,,,1,0,1,1,,
21237,CC002,"408,409x410",0,1,0,2/14/17,2/14/17,3/6/17,6/12/17,4,118,118,,,NA,NA,5,NA,0,0,,,0,5,1,0,,
21237,CC002,"408,409x410",0,1,0,2/14/17,2/14/17,3/6/17,6/18/17,5,124,124,,,NA,NA,3,7/17/17,1,2,,,3,0,1,1,,
21237,CC002,"408,409x410",0,1,0,2/14/17,2/14/17,3/6/17,7/10/17,6,146,146,,,NA,NA,4,NA,0,0,,,0,4,1,0,,
21237,CC002,"408,409x410",0,1,0,2/14/17,2/14/17,3/6/17,7/22/17,7,158,158,,,NA,NA,5,8/14/17,2,2,,,4,1,1,1,,
21237,CC002,"408,409x410",0,1,0,2/14/17,2/14/17,3/6/17,9/5/17,8,203,203,,,NA,NA,3,NA,0,0,,,0,3,1,0,,
21237,CC002,"408,409x410",0,1,0,2/14/17,2/14/17,3/6/17,9/26/17,9,224,224,,,NA,NA,1,NA,NA,NA,,,NA,NA,1,0,,
21236,CC002,"408,409x410",0,1,0,5/2/17,5/2/17,6/5/17,7/7/17,10,66,66,,,NA,NA,2,7/28/17,1,1,,,2,0,1,1,,
21236,CC002,"408,409x410",0,1,0,5/2/17,5/2/17,6/5/17,7/27/17,11,86,86,,,NA,NA,2,8/15/17,0,2,,,2,0,1,1,,
21236,CC002,"408,409x410",0,1,0,5/2/17,5/2/17,6/5/17,8/23/17,12,113,113,,,NA,NA,6,9/19/17,2,4,,,6,0,1,1,,
21236,CC002,"408,409x410",0,1,0,5/2/17,5/2/17,6/5/17,9/10/17,13,131,131,,,NA,NA,6,10/3/17,3,3,,,6,0,1,1,,
21236,CC002,"408,409x410",0,1,0,5/2/17,5/2/17,6/5/17,9/13/17,14,134,134,,,NA,NA,5,10/10/17,2,3,,,5,0,1,1,,
21236,CC002,"408,409x410",0,1,0,5/2/17,5/2/17,6/5/17,10/10/17,15,161,161,,,NA,NA,3,10/31/17,2,1,,,3,0,1,1,,
21236,CC002,"408,409x410",0,1,0,5/2/17,5/2/17,6/5/17,10/21/17,16,172,172,,,NA,NA,3,11/14/17,2,1,,,3,0,1,1,,
21236,CC002,"408,409x410",0,1,0,5/2/17,5/2/17,6/5/17,11/30/17,17,212,212,,,NA,NA,4,12/19/17,4,0,,,4,0,1,1,,
21237,CC002,"411,412x413",0,1,0,2/21/17,2/21/17,3/13/17,4/30/17,1,68,68,,,68,NA,2,5/22/17,1,1,,,2,0,1,1,1 female with vag prolapse 6/1/17,
21237,CC002,"411,412x413",0,1,0,2/21/17,2/21/17,3/13/17,5/9/17,2,77,77,,,NA,NA,3,5/30/17,0,2,,,2,1,1,1,1 female with vag prolapse 6/1/17,
21237,CC002,"411,412x413",0,1,0,2/21/17,2/21/17,3/13/17,5/23/17,3,91,91,,,NA,NA,1,NA,0,0,,,0,1,1,0,1 female with vag prolapse 6/1/17,
21237,CC002,"411,412x413",0,1,0,2/21/17,2/21/17,3/13/17,6/1/17,4,100,100,,,NA,NA,5,6/26/17,0,3,,,3,2,1,1,1 female with vag prolapse 6/1/17,
21237,CC002,"411,412x413",0,1,0,2/21/17,2/21/17,3/13/17,6/12/17,5,111,111,,,NA,NA,4,7/3/17,1,0,,,1,3,1,1,1 female with vag prolapse 6/1/17,
21237,CC002,"411,412x413",0,1,0,2/21/17,2/21/17,3/13/17,7/3/17,6,132,132,,,NA,NA,9,7/24/17,6,2,,,8,1,1,1,1 female with vag prolapse 6/1/17,
21237,CC002,"411,412x413",0,1,0,2/21/17,2/21/17,3/13/17,7/28/17,7,157,157,,,NA,NA,5,8/21/17,3,2,,,5,0,1,1,1 female with vag prolapse 6/1/17,
21237,CC002,"411,412x413",0,1,0,2/21/17,2/21/17,3/13/17,8/21/17,8,181,181,,,NA,NA,3,9/18/17,1,2,,,3,0,1,1,1 female with vag prolapse 6/1/17,
21237,CC002,"411,412x413",0,1,0,2/21/17,2/21/17,3/13/17,9/11/17,9,202,202,,,NA,NA,4,NA,NA,NA,,,NA,NA,1,0,1 female with vag prolapse 6/1/17,
21236,CC002,"411,412x413",0,1,0,6/23/17,6/23/17,7/17/17,8/30/17,10,68,68,,,NA,NA,6,9/26/17,1,3,,,4,2,1,1,,
21236,CC002,"411,412x413",0,1,0,6/23/17,6/23/17,7/17/17,9/12/17,11,81,81,,,NA,NA,3,10/3/17,1,1,,,2,1,1,1,,
21236,CC002,"411,412x413",0,1,0,6/23/17,6/23/17,7/17/17,9/19/17,12,88,88,,,NA,NA,2,10/10/17,2,0,,,2,0,1,1,,
21236,CC002,"411,412x413",0,1,0,6/23/17,6/23/17,7/17/17,12/10/17,13,170,170,,,NA,NA,5,1/4/18,2,1,,,3,2,1,1,2 missing ,
21236,CC002,"411,412x413",0,1,0,6/23/17,6/23/17,7/17/17,1/20/18,14,211,211,,,NA,NA,6,NA,NA,NA,,,NA,0,1,0,,
21237,CC002,"414,415x416",0,1,0,3/13/17,3/13/17,4/10/17,5/30/17,1,78,78,,,78,NA,1,NA,0,0,,,0,1,1,0,,
21237,CC002,"414,415x416",0,1,0,3/13/17,3/13/17,4/10/17,6/21/17,2,100,100,,,NA,NA,5,7/17/17,4,1,,,5,0,1,1,,
21237,CC002,"414,415x416",0,1,0,3/13/17,3/13/17,4/10/17,8/12/17,3,152,152,,,NA,NA,3,9/5/17,1,2,,,3,0,1,1,,
21237,CC002,"414,415x416",0,1,0,3/13/17,3/13/17,4/10/17,8/31/17,4,171,171,9/2/17,,NA,NA,8,9/25/17,8,0,,,8,0,2,2,,
21237,CC002,"414,415x416",0,1,0,3/13/17,3/13/17,4/10/17,9/26/17,5,197,197,,,NA,NA,5,NA,NA,NA,,,NA,0,1,0,,
21236,CC002,"414,415x416",0,1,0,6/25/17,6/25/17,7/17/17,9/9/17,6,76,76,9/13/17,,NA,NA,6,10/10/17,1,5,,,6,0,2,2,,
21236,CC002,"414,415x416",0,1,0,6/25/17,6/25/17,7/17/17,10/7/17,7,104,104,,,NA,NA,4,10/31/17,2,2,,,4,0,1,1,,
21236,CC002,"414,415x416",0,1,0,6/25/17,6/25/17,7/17/17,11/23/17,8,151,151,,,NA,NA,4,12/12/17,1,1,,,2,2,1,1,1 found dead,
21236,CC002,"414,415x416",0,1,0,6/25/17,6/25/17,7/17/17,11/30/17,9,158,158,,,NA,NA,3,12/18/17,1,2,,,3,0,1,1,,
21236,CC002,"414,415x416",0,1,0,6/25/17,6/25/17,7/17/17,1/11/18,10,200,200,,,NA,NA,9,1/30/18,6,2,,,8,1,1,1,,
21237,CC002,"417,418x419",0,1,0,3/12/17,3/12/17,4/10/17,6/3/17,1,83,83,,,83,NA,4,6/26/17,2,2,,,4,0,1,1,,
21237,CC002,"417,418x419",0,1,0,3/12/17,3/12/17,4/10/17,6/10/17,2,90,90,,,NA,NA,1,NA,0,0,,,0,1,1,0,missing,
21237,CC002,"417,418x419",0,1,0,3/12/17,3/12/17,4/10/17,6/25/17,3,105,105,,,NA,NA,2,7/17/17,1,1,,,2,0,1,1,,
21237,CC002,"417,418x419",0,1,0,3/12/17,3/12/17,4/10/17,8/17/17,4,158,158,,,NA,NA,3,9/5/17,0,1,,,1,2,1,1,1 BD,
21237,CC002,"417,418x419",0,1,0,3/12/17,3/12/17,4/10/17,8/24/17,5,165,165,,,NA,NA,1,NA,0,0,,,0,1,1,0,missing,
21237,CC002,"417,418x419",0,1,0,3/12/17,3/12/17,4/10/17,9/6/17,6,178,178,,,NA,NA,2,10/9/17,0,2,,,2,0,1,1,,
21237,CC002,"417,418x419",0,1,0,3/12/17,3/12/17,4/10/17,9/7/17,7,179,179,,,NA,NA,1,10/9/17,1,0,,,1,0,1,1,,
21236,CC002,"417,418x419",0,1,0,6/13/17,6/13/17,8/1/17,8/23/17,8,71,71,,,NA,NA,3,9/19/17,2,1,,,3,0,1,1,,
21236,CC002,"417,418x419",0,1,0,6/13/17,6/13/17,8/1/17,9/11/17,9,90,90,,,NA,NA,1,NA,0,0,,,0,1,1,0,missing,
21236,CC002,"417,418x419",0,1,0,6/13/17,6/13/17,8/1/17,10/11/17,10,120,120,,,NA,NA,4,10/31/17,1,2,,,3,1,1,1,1 FD,
21236,CC002,"417,418x419",0,1,0,6/13/17,6/13/17,8/1/17,10/23/17,11,132,132,,,NA,NA,4,NA,0,0,,,0,4,1,0,2 BD; 2 FD,
21236,CC002,"417,418x419",0,1,0,6/13/17,6/13/17,8/1/17,11/12/17,12,152,152,,,NA,NA,6,12/5/17,4,2,,,6,0,1,1,,
21236,CC002,"417,418x419",0,1,0,6/13/17,6/13/17,8/1/17,11/15/17,13,155,155,,,NA,NA,3,12/12/17,0,3,,,3,0,1,1,,
21236,CC002,"417,418x419",0,1,0,6/13/17,6/13/17,8/1/17,11/28/17,14,168,168,,,NA,NA,2,1/16/18,0,2,,,2,0,1,1,,
21236,CC002,"417,418x419",0,1,0,6/13/17,6/13/17,8/1/17,1/14/18,15,215,215,,,NA,NA,3,NA,NA,NA,,,NA,0,1,0,1 FD,
21237,CC002,"420,421x422",0,1,0,3/18/17,3/18/17,4/10/17,5/27/17,1,70,70,,,70,NA,5,6/19/17,1,4,,,5,0,1,1,,
21237,CC002,"420,421x422",0,1,0,3/18/17,3/18/17,4/10/17,7/5/17,2,109,109,,,NA,NA,5,7/24/17,1,2,,,3,2,1,1,missing,
21237,CC002,"420,421x422",0,1,0,3/18/17,3/18/17,4/10/17,7/14/17,3,118,118,,,NA,NA,1,NA,0,0,,,0,1,1,0,missing,
21237,CC002,"420,421x422",0,1,0,3/18/17,3/18/17,4/10/17,7/23/17,4,127,127,,,NA,NA,1,NA,0,0,,,0,1,1,0,,
21237,CC002,"420,421x422",0,1,0,3/18/17,3/18/17,4/10/17,7/25/17,5,129,129,,,NA,NA,4,8/14/17,2,2,,,4,0,1,1,,
21237,CC002,"420,421x422",0,1,0,3/18/17,3/18/17,4/10/17,8/4/17,6,139,139,,,NA,NA,6,8/28/17,5,1,,,6,0,1,1,,
21237,CC002,"420,421x422",0,1,0,3/18/17,3/18/17,4/10/17,8/18/17,7,153,153,,,NA,NA,1,9/5/17,0,1,,,1,0,1,1,,
21237,CC002,"420,421x422",0,1,0,3/18/17,3/18/17,4/10/17,8/28/17,8,163,163,,,NA,NA,3,9/25/17,3,0,,,3,0,1,1,,
21237,CC002,"420,421x422",0,1,0,3/18/17,3/18/17,4/10/17,9/18/17,9,184,184,,,NA,NA,3,10/9/17,1,2,,,3,0,1,1,,
21237,CC002,"420,421x422",0,1,0,3/18/17,3/18/17,4/10/17,9/29/17,10,195,195,,,NA,NA,1,NA,NA,NA,,,NA,0,1,0,,
21236,CC002,"420,421x422",0,1,0,6/13/17,6/13/17,8/1/17,9/4/17,11,83,83,,,NA,NA,5,9/26/17,3,2,,,5,0,1,1,,
21236,CC002,"420,421x422",0,1,0,6/13/17,6/13/17,8/1/17,9/14/17,12,93,93,,,NA,NA,5,10/10/17,4,1,,,5,0,1,1,,
21236,CC002,"420,421x422",0,1,0,6/13/17,6/13/17,8/1/17,10/8/17,13,117,117,,,NA,NA,1,10/31/17,0,0,,,0,1,1,0,missing,
21236,CC002,"420,421x422",0,1,0,6/13/17,6/13/17,8/1/17,11/9/17,14,149,149,,,NA,NA,4,12/5/17,1,2,,,3,1,1,1,,
21236,CC002,"420,421x422",0,1,0,6/13/17,6/13/17,8/1/17,12/9/17,15,179,179,,,NA,NA,3,12/27/17,2,1,,,3,0,1,1,,
21236,CC002,"420,421x422",0,1,0,6/13/17,6/13/17,8/1/17,1/2/18,16,203,203,,,NA,NA,1,1/16/18,0,0,,,0,1,1,0,,
21236,CC002,"420,421x422",0,1,0,6/13/17,6/13/17,8/1/17,2/4/18,17,236,236,,,NA,NA,2,NA,NA,NA,,,NA,0,1,0,1 BD,
21237,CC002,"423,424x425",0,1,0,3/27/17,3/27/17,4/17/17,5/27/17,1,61,61,,,61,NA,4,6/12/17,2,2,,,4,0,1,1,,
21237,CC002,"423,424x425",0,1,0,3/27/17,3/27/17,4/17/17,6/1/17,2,66,66,,,NA,NA,5,6/26/17,0,1,,,1,4,1,1,missing,
21237,CC002,"423,424x425",0,1,0,3/27/17,3/27/17,4/17/17,6/17/17,3,82,82,6/22/17,,NA,NA,14,7/17/17,3,2,,,5,9,2,2,"4 BD, 5 missing ",
21237,CC002,"423,424x425",0,1,0,3/27/17,3/27/17,4/17/17,7/10/17,4,105,105,,,NA,NA,1,NA,0,0,,,0,1,1,0,missing,
21237,CC002,"423,424x425",0,1,0,3/27/17,3/27/17,4/17/17,8/29/17,5,155,155,,,NA,NA,6,9/25/17,2,2,,,4,2,1,1,missing,
21237,CC002,"423,424x425",0,1,0,3/27/17,3/27/17,4/17/17,9/18/17,6,175,175,,,NA,NA,3,NA,0,0,,,0,3,1,0,missing,
21236,CC002,"423,424x425",0,1,0,7/4/17,7/4/17,8/1/17,9/13/17,7,71,71,,,NA,NA,6,NA,4,1,,,5,1,1,1,wean date illegible; 1 FD,
21236,CC002,"423,424x425",0,1,0,7/4/17,7/4/17,8/1/17,10/7/17,8,95,95,,,NA,NA,5,10/31/17,1,3,,,4,1,1,1,1 FD,
21236,CC002,"423,424x425",0,1,0,7/4/17,7/4/17,8/1/17,11/1/17,9,120,120,,,NA,NA,7,11/20/17,5,2,,,7,0,1,1,1 missing,
21236,CC002,"423,424x425",0,1,0,7/4/17,7/4/17,8/1/17,11/24/17,10,143,143,,,NA,NA,6,12/19/17,3,2,,,5,1,1,1,,
21236,CC002,"423,424x425",0,1,0,7/4/17,7/4/17,8/1/17,12/9/17,11,158,158,,,NA,NA,5,12/27/17,1,1,,,2,3,1,1,,
21236,CC002,"423,424x425",0,1,0,7/4/17,7/4/17,8/1/17,12/19/17,12,168,168,,,NA,NA,5,1/9/18,4,1,,,5,0,1,1,,
21236,CC002,"423,424x425",0,1,0,7/4/17,7/4/17,8/1/17,1/12/18,13,192,192,,,NA,NA,4,2/6/18,1,3,,,4,0,1,1,,
21236,CC002,"426,427x428",0,1,0,7/4/11,7/4/11,8/1/17,9/11/17,1,2261,2261,,,2261,NA,12,10/3/17,2,9,NA,NA,11,1,1,1,,
21236,CC002,"426,427x428",0,1,0,7/4/11,7/4/11,8/1/17,10/25/17,2,2305,2305,,,NA,NA,5,11/14/17,2,3,NA,NA,5,0,1,1,,
21236,CC002,"426,427x428",0,1,0,7/4/11,7/4/11,8/1/17,11/30/17,3,2341,2341,,,NA,NA,3,12/20/17,1,2,NA,NA,3,0,1,1,,
21236,CC002,"426,427x428",0,1,0,7/4/11,7/4/11,8/1/17,11/18/17,4,2329,2329,,,NA,NA,7,12/12/17,4,2,NA,NA,6,1,1,1,,
21236,CC002,"426,427x428",0,1,0,7/4/11,7/4/11,8/1/17,12/6/17,5,2347,2347,,,NA,NA,5,12/27/17,5,0,0,0,5,0,1,1,,
21236,CC002,"426,427x428",0,1,0,7/4/11,7/4/11,8/1/17,1/3/18,6,2375,2375,,,NA,NA,4,1/27/18,2,2,0,0,4,0,1,1,,
21236,CC002,"426,427x428",0,1,0,7/4/11,7/4/11,8/1/17,1/12/18,7,2384,2384,,,NA,NA,7,2/6/18,3,4,0,0,7,0,1,1,,
21236,CC002,"426,427x428",0,1,0,7/4/11,7/4/11,8/1/17,1/25/18,8,2397,2397,,,NA,NA,1,NA,NA,NA,NA,NA,NA,NA,1,0,,
21237,CC002,"426,427x428",0,1,0,3/27/17,3/27/17,4/17/17,7/5/17,9,100,100,,,NA,NA,6,NA,0,0,,,0,6,1,0,mising,
21237,CC002,"426,427x428",0,1,0,3/27/17,3/27/17,4/17/17,7/18/17,10,113,113,,,NA,NA,2,NA,0,0,,,0,2,1,0,mising,
21237,CC002,"426,427x428",0,1,0,3/27/17,3/27/17,4/17/17,7/25/17,11,120,120,,,NA,NA,6,8/21/17,1,0,,,1,5,1,1,mising,
21237,CC002,"426,427x428",0,1,0,3/27/17,3/27/17,4/17/17,8/17/17,12,143,143,,,NA,NA,1,9/5/17,1,0,,,1,0,1,1,,
21237,CC002,"426,427x428",0,1,0,3/27/17,3/27/17,4/17/17,10/2/17,13,189,189,,,NA,NA,3,10/9/17,3,0,,,3,0,1,1,,
21237,CC002,"429,430x431",0,1,0,4/10/17,4/10/17,5/1/17,NA,1,NA,NA,,,NA,NA,0,NA,0,0,,,0,0,1,0,nonproductive; 431 derm 7/20/17,
21236,CC002,"429,430x431",0,1,0,7/12/17,7/12/17,8/8/17,9/13/17,2,63,63,,,NA,NA,3,10/16/17,2,1,,,3,0,1,1,,
21236,CC002,"429,430x431",0,1,0,7/12/17,7/12/17,8/8/17,10/14/17,3,94,94,10/18/17,,NA,NA,14,11/6/17,5,9,,,14,0,2,2,,
21236,CC002,"429,430x431",0,1,0,7/12/17,7/12/17,8/8/17,11/25/17,4,136,136,,,NA,NA,5,12/12/17,1,3,,,4,1,1,1,,
21236,CC002,"429,430x431",0,1,0,7/12/17,7/12/17,8/8/17,12/16/17,5,157,157,,,NA,NA,2,1/4/18,0,2,,,2,0,1,1,,
21236,CC002,"429,430x431",0,1,0,7/12/17,7/12/17,8/8/17,1/22/18,6,194,194,,,NA,NA,1,NA,NA,NA,,,NA,0,1,0,,
21237,CC002,"432,433x434",0,1,0,4/8/17,4/8/17,5/15/17,9/2/17,1,147,147,,,147,NA,3,10/2/17,2,1,,,3,0,1,1,,
21236,CC002,"432,433xx434",0,1,0,7/12/17,7/12/17,8/8/17,9/18/17,1,68,68,,,68,NA,5,10/10/17,1,4,,,5,0,1,1,,
21236,CC002,"432,433xx434",0,1,0,7/12/17,7/12/17,8/8/17,10/17/17,2,97,97,,,NA,NA,5,11/6/17,3,2,,,5,0,1,1,,
21236,CC002,"432,433xx434",0,1,0,7/12/17,7/12/17,8/8/17,11/18/17,3,129,129,,,NA,NA,3,12/12/17,1,2,,,3,0,1,1,,
21236,CC002,"432,433xx434",0,1,0,7/12/17,7/12/17,8/8/17,11/27/17,4,138,138,,,NA,NA,3,12/19/17,0,2,,,2,1,1,1,missing,
21236,CC002,"432,433xx434",0,1,0,7/12/17,7/12/17,8/8/17,12/14/17,5,155,155,,,NA,NA,2,1/4/18,2,0,,,2,0,1,1,,
21236,CC002,"432,433xx434",0,1,0,7/12/17,7/12/17,8/8/17,12/21/17,6,162,162,,,NA,NA,2,1/9/18,1,1,,,2,0,1,1,,
21237,CC002,"435,436x437",0,1,0,4/20/17,4/20/17,5/15/17,7/6/17,1,77,77,,,77,NA,2,7/31/17,2,0,,,2,0,1,1,,
21237,CC002,"435,436x437",0,1,0,4/20/17,4/20/17,5/15/17,7/24/17,2,95,95,,,NA,NA,5,8/14/17,1,0,,,1,4,1,1,,
21237,CC002,"435,436x437",0,1,0,4/20/17,4/20/17,5/15/17,8/15/17,3,117,117,,,NA,NA,10,9/5/17,5,2,,,7,3,1,1,,
21237,CC002,"435,436x437",0,1,0,4/20/17,4/20/17,5/15/17,9/19/17,4,152,152,,,NA,NA,5,10/16/17,3,2,,,5,0,1,1,,
21237,CC002,"435,436x437",0,1,0,4/20/17,4/20/17,5/15/17,10/6/17,5,169,169,10/11/17,,NA,NA,6,10/30/17,4,2,,,6,0,2,2,437 sever derm 10/4/17,
21236,CC002,"435,436x437",0,1,0,8/11/17,8/11/17,9/6/17,10/25/17,6,75,75,,,NA,NA,3,11/14/17,0,3,,,3,0,1,1,,
21236,CC002,"435,436x437",0,1,0,8/11/17,8/11/17,9/6/17,11/2/17,7,83,83,,,NA,NA,8,11/29/17,4,4,,,8,0,1,1,,
21236,CC002,"435,436x437",0,1,0,8/11/17,8/11/17,9/6/17,12/18/17,8,129,129,,,NA,NA,1,NA,0,0,,,0,1,1,0,missing,
21236,CC002,"435,436x437",0,1,0,8/11/17,8/11/17,9/6/17,12/22/17,9,133,133,,,NA,NA,2,1/9/18,1,0,,,1,1,1,1,1 FD,
21236,CC002,"435,436x437",0,1,0,8/11/17,8/11/17,9/6/17,1/7/18,10,149,149,,,NA,NA,2,1/20/18,1,1,,,2,0,1,1,,
21236,CC002,"435,436x437",0,1,0,8/11/17,8/11/17,9/6/17,1/25/18,11,167,167,,,NA,NA,4,2/20/18,1,2,,,3,1,1,1,1 missing ,
21236,CC002,"435,436x437",0,1,0,8/11/17,8/11/17,9/6/17,2/28/18,12,201,201,,,NA,NA,2,3/20/18,1,1,,,2,0,1,1,,
21236,CC002,"435,436x437",0,1,0,8/11/17,8/11/17,9/6/17,3/17/18,13,218,218,,,NA,NA,2,NA,NA,NA,,,NA,0,1,0,,
21236,CC002,"438,439x440",0,1,0,9/11/17,9/11/17,10/3/17,11/27/17,1,77,77,,,77,NA,2,12/19/17,1,1,0,,2,0,1,1,,
21236,CC002,"438,439x440",0,1,0,9/11/17,9/11/17,10/3/17,12/18/17,2,98,98,,,NA,NA,3,1/9/18,0,3,0,,3,0,1,1,,
21236,CC002,"438,439x440",0,1,0,9/11/17,9/11/17,10/3/17,1/18/18,3,129,129,,,NA,NA,3,2/6/18,1,2,0,,3,0,1,1,,
21236,CC002,"438,439x440",0,1,0,9/11/17,9/11/17,10/3/17,2/8/18,4,150,150,,,NA,NA,4,2/27/18,4,0,0,,4,0,1,1,,
21236,CC002,"438,439x440",0,1,0,9/11/17,9/11/17,10/3/17,3/1/18,5,171,171,,,NA,NA,3,3/20/18,0,2,1,1 missing,2,1,1,1,1 missing,
21236,CC002,"438,439x440",0,1,0,9/11/17,9/11/17,10/3/17,3/21/18,6,191,191,,,NA,NA,5,4/10/18,3,2,0,,5,0,1,1,,
21237,CC002,438x439,1,0,0,4/20/17,4/20/17,5/15/17,7/10/17,1,81,81,,,81,NA,4,7/31/17,0,4,,,4,0,1,1,,
21237,CC002,438x439,1,0,0,4/20/17,4/20/17,5/15/17,8/1/17,2,103,103,,,NA,22,2,8/21/17,0,0,,,0,2,1,0,missing,
21237,CC002,438x439,1,0,0,4/20/17,4/20/17,5/15/17,9/3/17,3,136,136,,,NA,33,4,9/25/17,3,1,,,4,0,1,1,,
21237,CC002,440x441,1,0,0,4/18/17,4/18/17,5/15/17,7/27/17,1,100,100,,,100,NA,6,8/21/17,3,3,0,0,6,0,1,1,male injured 7/24/17,
21236,CC002,441x442,1,0,0,9/12/17,9/12/17,10/3/17,NA,1,NA,NA,,,NA,NA,0,NA,0,0,,,0,0,1,0,nonproductive,
21236,CC002,"442,443x444",0,1,0,5/2/17,5/2/17,6/00/17,7/11/17,1,70,70,,,70,NA,5,8/1/17,0,4,,,4,1,1,1,missing,
21236,CC002,"442,443x444",0,1,0,5/2/17,5/2/17,6/00/17,7/25/17,2,84,84,,,NA,NA,3,8/1/17,0,0,,,0,3,1,0,missing,
21236,CC002,"442,443x444",0,1,0,5/2/17,5/2/17,6/00/17,8/1/17,3,91,91,,,NA,NA,5,8/21/17,4,1,,,5,0,1,1,,
21236,CC002,"442,443x444",0,1,0,5/2/17,5/2/17,6/00/17,9/21/17,4,142,142,,,NA,NA,2,10/9/17,2,0,,,2,0,1,1,,
21236,CC002,"442,443x444",0,1,0,5/2/17,5/2/17,6/00/17,10/11/17,5,162,162,,,NA,NA,6,11/6/17,3,3,,,6,0,1,1,,
21236,CC002,"443,444x445",0,1,0,9/14/17,9/14/17,10/10/17,12/23/17,1,100,100,,,100,NA,5,12/26/17,0,0,,,0,5,1,0,443 FD,
21236,CC002,"443,444x445",0,1,0,9/14/17,9/14/17,10/10/17,1/16/18,2,124,124,,,NA,NA,4,2/6/18,2,2,,,4,0,1,1,,
21236,CC002,"443,444x445",0,1,0,9/14/17,9/14/17,10/10/17,3/18/18,3,185,185,,,NA,NA,2,NA,NA,NA,,,NA,0,1,0,,
21237,CC002,"445,446x447",0,1,0,5/2/17,5/2/17,5/30/17,7/30/17,1,89,89,8/1/17,,89,NA,8,8/21/17,7,2,,,9,-1,2,2,,
21237,CC002,"445,446x447",0,1,0,5/2/17,5/2/17,5/30/17,8/19/17,2,109,109,8/23/17,,NA,NA,7,9/18/17,6,1,,,7,0,2,2,,
21237,CC002,"445,446x447",0,1,0,5/2/17,5/2/17,5/30/17,10/12/17,3,163,163,,,NA,NA,6,10/30/17,3,3,,,6,0,1,1,447 FD 10/9/17,
21236,CC002,"446,447x448",0,1,0,9/23/17,9/23/17,10/16/17,11/29/17,1,67,67,,,67,NA,4,12/19/17,0,3,1,,3,1,1,1,,
21236,CC002,"446,447x448",0,1,0,9/23/17,9/23/17,10/16/17,12/25/17,2,93,93,,,NA,NA,4,1/16/18,3,1,0,,4,0,1,1,,
21236,CC002,"446,447x448",0,1,0,9/23/17,9/23/17,10/16/17,2/1/18,3,131,131,2/8/18,,NA,NA,8,2/27/18,5,3,0,,8,0,2,2,,
21236,CC002,"446,447x448",0,1,0,9/23/17,9/23/17,10/16/17,3/14/18,4,172,172,,,NA,NA,4,4/3/18,4,0,0,,4,0,1,1,,
21236,CC002,"446,447x448",0,1,0,9/23/17,9/23/17,10/16/17,4/7/18,5,196,196,,,NA,NA,3,NA,0,0,3,,0,3,1,0,,
21237,CC002,"448,449x450",0,1,0,5/9/17,5/9/17,5/30/17,7/13/17,1,65,65,,,65,NA,3,8/7/17,2,1,,,3,0,1,1,,
21237,CC002,"448,449x450",0,1,0,5/9/17,5/9/17,5/30/17,8/3/17,2,86,86,,,NA,NA,4,8/28/17,2,2,,,4,0,1,1,,
21237,CC002,"448,449x450",0,1,0,5/9/17,5/9/17,5/30/17,8/25/17,3,108,108,,,NA,NA,6,9/18/17,3,3,,,6,0,1,1,,
21237,CC002,"448,449x450",0,1,0,5/9/17,5/9/17,5/30/17,8/29/17,4,112,112,,,NA,NA,5,9/25/17,1,4,,,5,0,1,1,,
21237,CC002,"448,449x450",0,1,0,5/9/17,5/9/17,5/30/17,9/18/17,5,132,132,,,NA,NA,4,10/9/17,2,1,,,3,1,1,1,missing,
21237,CC002,"448,449x450",0,1,0,5/9/17,5/9/17,5/30/17,10/8/17,6,152,152,,,NA,NA,2,10/20/17,0,1,,,1,1,1,1,missing,
21237,CC002,"448,449x450",0,1,0,5/9/17,5/9/17,5/30/17,11/1/17,7,176,176,11/4/17,,NA,NA,7,11/27/17,3,4,,,7,0,2,2,,
21236,CC002,"449,450x451",0,1,0,10/10/17,10/10/17,10/31/17,1/10/18,1,92,92,,,92,NA,8,1/30/18,5,3,0,,8,0,1,1,,
21236,CC002,"449,450x451",0,1,0,10/10/17,10/10/17,10/31/17,2/8/18,2,121,121,,,NA,NA,3,3/6/18,0,3,0,,3,0,1,1,,
21236,CC002,"449,450x451",0,1,0,10/10/17,10/10/17,10/31/17,2/28/18,3,141,141,,,NA,NA,4,3/20/18,2,2,0,,4,0,1,1,,
21236,CC002,"449,450x451",0,1,0,10/10/17,10/10/17,10/31/17,3/7/18,4,148,148,,,NA,NA,3,4/3/18,2,1,0,,3,0,1,1,,
21236,CC002,"449,450x451",0,1,0,10/10/17,10/10/17,10/31/17,4/12/18,5,184,184,,,NA,NA,3,5/15/18,3,0,0,LNR,3,0,1,1,LNR,
21236,CC002,"449,450x451",0,1,0,10/10/17,10/10/17,10/31/17,5/11/18,6,213,213,,,NA,NA,4,6/5/18,2,2,0,,4,0,1,1,,
21237,CC002,"451,452x453",0,1,0,5/26/17,5/26/17,6/12/17,8/16/17,1,82,82,,,82,NA,1,9/5/17,0,1,,,1,0,1,1,,
21237,CC002,"451,452x453",0,1,0,5/26/17,5/26/17,6/12/17,8/28/17,2,94,94,9/5/17,,NA,NA,8,10/2/17,3,4,,,7,1,2,2,1 missing,
21236,CC002,"452,453x454",0,1,0,10/7/17,10/7/17,10/31/17,2/5/18,1,121,121,2/8/18,,121,NA,6,2/27/18,5,1,0,,6,0,2,2,,
21236,CC002,"452,453x454",0,1,0,10/7/17,10/7/17,10/31/17,3/3/18,2,147,147,,,NA,NA,2,3/27/18,2,0,0,,2,0,1,1,,
21236,CC002,"452,453x454",0,1,0,10/7/17,10/7/17,10/31/17,5/1/18,3,206,206,,,NA,NA,1,5/22/18,1,0,0,454 AH 6/5/18,1,0,1,1,454 AH 6/5/18,
21237,CC002,"454,455x456",0,1,0,5/26/17,5/26/17,6/12/17,9/13/17,1,110,110,,,110,NA,3,9/19/17,0,0,,,0,3,1,0,,
21237,CC002,"454,455x456",0,1,0,5/26/17,5/26/17,6/12/17,10/4/17,2,131,131,,,NA,NA,1,10/30/17,1,0,,,1,0,1,1,,
21237,CC002,"454,455x456",0,1,0,5/26/17,5/26/17,6/12/17,10/24/17,3,151,151,,,NA,NA,6,11/29/17,1,5,,,6,0,1,1,,
21236,CC002,"455,456x457",0,1,0,10/10/17,10/10/17,11/29/17,12/25/17,1,76,76,,,76,NA,4,1/16/18,1,2,1,1 FD,3,1,1,1,1 FD,
21236,CC002,"455,456x457",0,1,0,10/10/17,10/10/17,11/29/17,1/25/18,2,107,107,,,NA,NA,8,NA,0,0,8,5 missing; 3 FD,0,8,1,0,5 missing; 3 FD,
21236,CC002,"455,456x457",0,1,0,10/10/17,10/10/17,11/29/17,2/13/18,3,126,126,,,NA,NA,4,NA,0,0,4,4 FD,0,4,1,0,4 FD,
21236,CC002,"455,456x457",0,1,0,10/10/17,10/10/17,11/29/17,2/21/18,4,134,134,,,NA,NA,3,NA,0,0,3,FD,0,3,1,0,FD,
21236,CC002,"455,456x457",0,1,0,10/10/17,10/10/17,11/29/17,5/20/18,5,222,222,,,NA,NA,1,6/12/18,0,1,0,,1,0,1,1,,
21236,CC002,"455,456x457",0,1,0,10/10/17,10/10/17,11/29/17,6/25/18,6,258,258,,,NA,NA,3,7/17/18,1,2,0,,3,0,1,1,,
21237,CC002,"457,458x459",0,1,0,6/2/17,6/2/17,6/26/17,9/2/17,1,92,92,,,92,NA,3,10/2/17,0,3,,,3,0,1,1,,
21237,CC002,"457,458x459",0,1,0,6/2/17,6/2/17,6/26/17,9/12/17,2,102,102,,,NA,NA,5,10/2/17,0,1,,,1,4,1,1,4 missing,
21237,CC002,"457,458x459",0,1,0,6/2/17,6/2/17,6/26/17,9/26/17,3,116,116,,,NA,NA,1,10/16/17,1,0,,,1,0,1,1,,
21237,CC002,"457,458x459",0,1,0,6/2/17,6/2/17,6/26/17,10/16/17,4,136,136,,,NA,NA,1,11/6/17,0,1,,,1,0,1,1,458 missing 10/2/17,
21236,CC002,"458,459x460",0,1,0,10/3/17,10/3/17,11/29/17,12/20/17,1,78,78,,,78,NA,2,1/16/18,2,0,0,,2,0,1,1,,
21236,CC002,"458,459x460",0,1,0,10/3/17,10/3/17,11/29/17,1/15/18,2,104,104,,,NA,NA,5,2/6/18,2,3,0,,5,0,1,1,,
21236,CC002,"458,459x460",0,1,0,10/3/17,10/3/17,11/29/17,2/11/18,3,131,131,,,NA,NA,5,3/13/18,3,0,2,2 missing,3,2,1,1,2 missing,
21236,CC002,"458,459x460",0,1,0,10/3/17,10/3/17,11/29/17,3/1/18,4,149,149,,,NA,NA,3,3/27/18,2,1,0,,3,0,1,1,,
21236,CC002,"458,459x460",0,1,0,10/3/17,10/3/17,11/29/17,4/5/18,5,184,184,,,NA,NA,5,4/23/18,1,2,2,2 FD,3,2,1,1,2 FD,
21236,CC002,"458,459x460",0,1,0,10/3/17,10/3/17,11/29/17,5/11/18,6,220,220,,,NA,NA,2,6/5/18,1,0,1,1 FD,1,1,1,1,1 FD,
21236,CC002,"458,459x460",0,1,0,10/3/17,10/3/17,11/29/17,5/20/18,7,229,229,,,NA,NA,1,6/12/18,1,0,0,460 AH 7/17/18,1,0,1,1,460 AH 7/17/18,
21237,CC002,"460,461x462",0,1,0,6/6/17,6/6/17,6/26/17,9/8/17,1,94,94,9/11/17,,94,NA,7,10/2/17,1,8,,,9,-2,2,2,,
21237,CC002,"460,461x462",0,1,0,6/6/17,6/6/17,6/26/17,10/1/17,2,117,117,,,NA,NA,6,11/6/17,3,2,,,5,1,1,1,,
21237,CC002,"460,461x462",0,1,0,6/6/17,6/6/17,6/26/17,10/23/17,3,139,139,,,NA,NA,6,11/27/17,2,4,,,6,0,1,1,,
21237,CC002,"460,461x462",0,1,0,6/6/17,6/6/17,6/26/17,11/25/17,4,172,172,,,NA,NA,2,12/18/17,1,1,,,2,0,1,1,,
21237,CC002,"460,461x462",0,1,0,6/6/17,6/6/17,6/26/17,12/21/17,5,198,198,,,NA,NA,2,NA,0,0,,,0,2,1,0,,
21236,CC002,"461,462x463",0,1,0,11/18/17,11/18/17,12/12/17,2/11/18,1,85,85,,,85,NA,4,3/6/18,2,2,0,,4,0,1,1,,
21236,CC002,"461,462x463",0,1,0,11/18/17,11/18/17,12/12/17,2/26/18,2,100,100,,,NA,NA,4,3/20/18,2,2,0,,4,0,1,1,,
21236,CC002,"461,462x463",0,1,0,11/18/17,11/18/17,12/12/17,3/21/18,3,123,123,,,NA,NA,1,4/10/18,0,0,1,missing,0,1,1,0,missing,
21236,CC002,"461,462x463",0,1,0,11/18/17,11/18/17,12/12/17,4/18/18,4,151,151,,,NA,NA,3,5/15/18,1,2,0,,3,0,1,1,,
21237,CC002,"463,464x465",0,1,0,6/20/17,6/20/17,7/17/17,9/6/17,1,78,78,,,78,NA,4,9/13/17,0,0,,,0,4,1,0,missing,
21237,CC002,"463,464x465",0,1,0,6/20/17,6/20/17,7/17/17,9/18/17,2,90,90,,,NA,NA,3,10/9/17,1,2,,,3,0,1,1,,
21237,CC002,"463,464x465",0,1,0,6/20/17,6/20/17,7/17/17,10/8/17,3,110,110,,,NA,NA,5,10/30/17,3,2,,,5,0,1,1,,
21237,CC002,"463,464x465",0,1,0,6/20/17,6/20/17,7/17/17,11/18/17,4,151,151,11/21/17,,NA,NA,4,12/11/17,1,3,,,4,0,2,2,,
21237,CC002,"463,464x465",0,1,0,6/20/17,6/20/17,7/17/17,12/8/17,5,171,171,,,NA,NA,2,12/26/17,0,1,,,1,1,1,1,,
21236,CC002,"464,465x466",0,1,0,11/18/17,11/18/17,12/12/17,1/23/18,1,66,66,,,66,NA,3,2/20/18,2,1,0,,3,0,1,1,,
21236,CC002,"464,465x466",0,1,0,11/18/17,11/18/17,12/12/17,1/30/18,2,73,73,,,NA,NA,2,2/20/18,0,2,0,,2,0,1,1,,
21236,CC002,"464,465x466",0,1,0,11/18/17,11/18/17,12/12/17,2/15/18,3,89,89,,,NA,NA,5,3/17/18,3,2,0,,5,0,1,1,,
21236,CC002,"464,465x466",0,1,0,11/18/17,11/18/17,12/12/17,2/21/18,4,95,95,,,NA,NA,6,3/30/18,4,2,0,,6,0,1,1,,
21236,CC002,"464,465x466",0,1,0,11/18/17,11/18/17,12/12/17,4/7/18,5,140,140,,,NA,NA,6,5/1/18,4,2,0,,6,0,1,1,,
21236,CC002,"464,465x466",0,1,0,11/18/17,11/18/17,12/12/17,4/14/18,6,147,147,,,NA,NA,6,5/15/18,1,5,0,,6,0,1,1,,
21236,CC002,"464,465x466",0,1,0,11/18/17,11/18/17,12/12/17,5/22/18,7,185,185,,,NA,NA,2,6/12/18,2,0,0,,2,0,1,1,,
21236,CC002,"464,465x466",0,1,0,11/18/17,11/18/17,12/12/17,5/31/18,8,194,194,,,NA,NA,4,6/19/18,4,0,0,,4,0,1,1,,
21236,CC002,"464,465x466",0,1,0,11/18/17,11/18/17,12/12/17,6/13/18,9,207,207,,,NA,NA,2,7/17/18,2,0,0,,2,0,1,1,,
21236,CC002,"464,465x466",0,1,0,11/18/17,11/18/17,12/12/17,7/17/18,10,241,241,,,NA,NA,2,8/7/18,2,0,0,,2,0,1,1,,
21236,CC002,"464,465x466",0,1,0,11/18/17,11/18/17,12/12/17,8/6/18,11,261,261,,,NA,NA,3,8/28/18,1,2,0,,3,0,1,1,,
21236,CC002,"464,465x466",0,1,0,11/18/17,11/18/17,12/12/17,8/14/18,12,269,269,,,NA,NA,2,9/5/18,0,2,0,,2,0,1,1,,
21236,CC002,"464,465x466",0,1,0,11/18/17,11/18/17,12/12/17,9/15/18,13,301,301,,,NA,NA,1,NA,0,0,1,,0,1,1,0,,
21237,CC002,"466,467x468",0,1,0,6/18/17,6/18/17,7/17/17,9/5/17,1,79,79,,,79,NA,4,10/2/17,1,3,,,4,0,1,1,,
21237,CC002,"466,467x468",0,1,0,6/18/17,6/18/17,7/17/17,9/20/17,2,94,94,,,NA,NA,3,NA,0,0,,,0,3,1,0,"1 BD, 2 missing",
21237,CC002,"466,467x468",0,1,0,6/18/17,6/18/17,7/17/17,9/26/17,3,100,100,,,NA,NA,2,10/23/17,0,0,,,0,2,1,0,2 FD,
21237,CC002,"466,467x468",0,1,0,6/18/17,6/18/17,7/17/17,10/17/17,4,121,121,,,NA,NA,6,11/6/17,1,0,,,1,5,1,1,,
21237,CC002,"466,467x468",0,1,0,6/18/17,6/18/17,7/17/17,11/7/17,5,142,142,,,NA,NA,2,11/27/17,1,1,,,2,0,1,1,,
21237,CC002,"466,467x468",0,1,0,6/18/17,6/18/17,7/17/17,11/9/17,6,144,144,,,NA,NA,1,11/27/17,0,1,,,1,0,1,1,,
21237,CC002,"466,467x468",0,1,0,6/18/17,6/18/17,7/17/17,12/4/17,7,169,169,,,NA,NA,1,12/11/17,0,0,,,0,1,1,0,missing,
21236,CC002,"467,468x469",0,1,0,12/10/17,12/10/17,1/4/18,2/17/18,1,69,69,,,69,NA,5,3/13/18,4,1,0,,5,0,1,1,,
21236,CC002,"467,468x469",0,1,0,12/10/17,12/10/17,1/4/18,3/19/18,2,99,99,,,NA,NA,6,4/10/18,2,4,0,,6,0,1,1,,
21236,CC002,"467,468x469",0,1,0,12/10/17,12/10/17,1/4/18,4/21/18,3,132,132,,,NA,NA,4,5/15/18,3,1,0,,4,0,1,1,,
21236,CC002,"467,468x469",0,1,0,12/10/17,12/10/17,1/4/18,5/14/18,4,155,155,,,NA,NA,2,6/5/18,0,1,1,1 missing,1,1,1,1,1 missing,
21236,CC002,"467,468x469",0,1,0,12/10/17,12/10/17,1/4/18,7/2/18,5,204,204,,,NA,NA,3,7/24/18,2,0,1,1 BD; 469 FD 7/16/18,2,1,1,1,1 BD; 469 FD 7/16/18,
21236,CC002,"469,470x471",0,1,0,6/21/17,6/21/17,7/17/17,8/30/17,1,70,70,9/4/17,,70,NA,5,10/2/17,2,3,,,5,0,2,2,,
21236,CC002,"469,470x471",0,1,0,6/21/17,6/21/17,7/17/17,9/25/17,2,96,96,,,NA,NA,3,10/10/17,2,0,,,2,1,1,1,,
21236,CC002,"469,470x471",0,1,0,6/21/17,6/21/17,7/17/17,10/18/17,3,119,119,,,NA,NA,6,NA,0,0,,,0,6,1,0,,
21236,CC002,"469,470x471",0,1,0,6/21/17,6/21/17,7/17/17,11/8/17,4,140,140,,,NA,NA,3,NA,0,0,,,0,3,1,0,,
21236,CC002,"469,470x471",0,1,0,6/21/17,6/21/17,7/17/17,11/10/17,5,142,142,,,NA,NA,4,NA,0,0,,,0,4,1,0,,
21236,CC002,"470,471x472",0,1,0,12/19/17,12/19/17,1/9/18,3/3/18,1,74,74,,,74,NA,3,3/27/18,2,1,0,,3,0,1,1,,
21236,CC002,"470,471x472",0,1,0,12/19/17,12/19/17,1/9/18,3/10/18,2,81,81,,,NA,NA,1,NA,0,0,1,missing,0,1,1,0,missing,
21236,CC002,"470,471x472",0,1,0,12/19/17,12/19/17,1/9/18,3/21/18,3,92,92,,,NA,NA,1,4/10/18,0,1,0,,1,0,1,1,,
21236,CC002,"470,471x472",0,1,0,12/19/17,12/19/17,1/9/18,4/24/18,4,126,126,,,NA,NA,8,5/15/18,2,5,1,1 FD,7,1,1,1,1 FD,
21236,CC002,"470,471x472",0,1,0,12/19/17,12/19/17,1/9/18,5/17/18,5,149,149,,,NA,NA,4,6/5/18,0,3,1,1 female AH,3,1,1,1,1 female AH,
21236,CC002,"470,471x472",0,1,0,12/19/17,12/19/17,1/9/18,5/30/18,6,162,162,,,NA,NA,2,6/19/18,1,1,0,1 BD,2,0,1,1,1 BD,
21236,CC002,"470,471x472",0,1,0,12/19/17,12/19/17,1/9/18,6/9/18,7,172,172,,,NA,NA,2,7/3/18,2,0,0,,2,0,1,1,,
21236,CC002,"470,471x472",0,1,0,12/19/17,12/19/17,1/9/18,7/1/18,8,194,194,,,NA,NA,4,7/24/18,2,2,0,,4,0,1,1,,
21236,CC002,"470,471x472",0,1,0,12/19/17,12/19/17,1/9/18,7/4/18,9,197,197,,,NA,NA,4,7/24/18,1,3,0,,4,0,1,1,,
21236,CC002,"470,471x472",0,1,0,12/19/17,12/19/17,1/9/18,7/24/18,10,217,217,,,NA,NA,1,NA,0,0,1,missing,0,1,1,0,missing,
21236,CC002,"470,471x472",0,1,0,12/19/17,12/19/17,1/9/18,8/12/18,11,236,236,,,NA,NA,2,NA,0,0,2,1 BD; 1 missing,0,2,1,0,1 BD; 1 missing,
21236,CC002,"470,471x472",0,1,0,12/19/17,12/19/17,1/9/18,8/15/18,12,239,239,,,NA,NA,1,NA,0,0,1,no data on cage card,0,1,1,0,no data on cage card,
21236,CC002,"470,471x472",0,1,0,12/19/17,12/19/17,1/9/18,8/29/18,13,253,253,,,NA,NA,3,NA,0,0,3,no data on cage card,0,3,1,0,no data on cage card,
21237,CC002,"472,473x474",0,1,0,6/20/17,6/20/17,7/17/17,10/2/17,1,104,104,,,104,NA,7,10/9/17,3,4,,,7,0,1,1,,
21237,CC002,"472,473x474",0,1,0,6/20/17,6/20/17,7/17/17,10/10/17,2,112,112,,,NA,NA,2,NA,0,0,,,0,2,1,0,missing; 474 pulled 9/20 with severe bite,
21236,CC002,"473,474x475",0,1,0,1/12/18,1/12/18,2/6/18,4/4/18,1,82,82,,,82,NA,3,4/23/18,1,1,1,,2,1,1,1,,
21236,CC002,"473,474x475",0,1,0,1/12/18,1/12/18,2/6/18,4/8/18,2,86,86,,,NA,NA,7,5/1/18,2,5,0,,7,0,1,1,,
21236,CC002,"473,474x475",0,1,0,1/12/18,1/12/18,2/6/18,5/7/18,3,115,115,,,NA,NA,6,5/30/18,2,2,2,,4,2,1,1,,
21236,CC002,"473,474x475",0,1,0,1/12/18,1/12/18,2/6/18,6/21/18,4,160,160,,,NA,NA,4,7/17/18,1,3,0,,4,0,1,1,,
21236,CC002,"473,474x475",0,1,0,1/12/18,1/12/18,2/6/18,7/14/18,5,183,183,,,NA,NA,4,8/7/18,2,2,0,,4,0,1,1,,
21236,CC002,"473,474x475",0,1,0,1/12/18,1/12/18,2/6/18,8/11/18,6,211,211,,,NA,NA,2,9/5/18,2,0,0,,2,0,1,1,,
21236,CC002,"473,474x475",0,1,0,1/12/18,1/12/18,2/6/18,9/2/18,7,233,233,,,NA,NA,3,9/25/18,2,1,0,,3,0,1,1,,
21236,CC002,"473,474x475",0,1,0,1/12/18,1/12/18,2/6/18,9/23/18,8,254,254,,,NA,NA,4,NA,0,0,4,,0,4,1,0,,
21237,CC002,"475,476x477",0,1,0,7/13/17,7/13/17,8/7/17,9/17/17,1,66,66,,,66,NA,7,10/9/17,4,3,,,7,0,1,1,,
21237,CC002,"475,476x477",0,1,0,7/13/17,7/13/17,8/7/17,9/28/17,2,77,77,,,NA,NA,2,10/16/17,1,1,,,2,0,1,1,,
21237,CC002,"475,476x477",0,1,0,7/13/17,7/13/17,8/7/17,10/13/17,3,92,92,,,NA,NA,6,11/6/17,3,3,,,6,0,1,1,,
21237,CC002,"475,476x477",0,1,0,7/13/17,7/13/17,8/7/17,10/19/17,4,98,98,,,NA,NA,1,11/13/17,0,0,,,0,1,1,0,,
21237,CC002,"475,476x477",0,1,0,7/13/17,7/13/17,8/7/17,11/5/17,5,115,115,,,NA,NA,6,11/27/17,3,3,,,6,0,1,1,,
21237,CC002,"475,476x477",0,1,0,7/13/17,7/13/17,8/7/17,11/25/17,6,135,135,,,NA,NA,3,12/26/17,2,1,,,3,0,1,1,,
21237,CC002,"475,476x477",0,1,0,7/13/17,7/13/17,8/7/17,12/16/17,7,156,156,,,NA,NA,1,NA,0,0,,,0,1,1,0,,
21237,CC002,"478,479x480",0,1,0,7/25/17,7/25/17,8/14/17,10/6/17,1,73,73,,,73,NA,4,10/30/17,3,1,,,4,0,1,1,,
21237,CC002,"478,479x480",0,1,0,7/25/17,7/25/17,8/14/17,11/17/17,2,115,115,11/23/17,,NA,NA,6,12/11/17,3,3,,,6,0,2,2,,
21237,CC002,"478,479x480",0,1,0,7/25/17,7/25/17,8/14/17,12/14/17,3,142,142,,,NA,NA,3,1/18/18,2,1,,,3,0,1,1,,
21237,CC002,"478,479x480",0,1,0,7/25/17,7/25/17,8/14/17,1/3/18,4,162,162,,,NA,NA,3,1/22/18,0,1,,,1,2,1,1,,
21237,CC002,"478,479x480",0,1,0,7/25/17,7/25/17,8/14/17,1/20/18,5,179,179,,,NA,NA,3,2/19/18,2,1,,,3,0,1,1,,
21236,CC002,478x479,1,0,0,1/12/18,1/12/18,2/6/18,3/19/18,1,66,66,,,66,NA,3,4/10/18,0,3,0,,3,0,1,1,,
21236,CC002,478x479,1,0,0,1/12/18,1/12/18,2/6/18,4/23/18,2,101,101,,,NA,35,2,5/15/18,1,1,0,,2,0,1,1,,
21236,CC002,478x479,1,0,0,1/12/18,1/12/18,2/6/18,5/29/18,3,137,137,,,NA,36,3,6/19/18,1,2,0,,3,0,1,1,,
21236,CC002,478x479,1,0,0,1/12/18,1/12/18,2/6/18,6/19/18,4,158,158,,,NA,21,2,7/17/18,0,2,0,,2,0,1,1,,
21236,CC002,478x479,1,0,0,1/12/18,1/12/18,2/6/18,7/9/18,5,178,178,,,NA,20,3,7/31/18,1,2,0,,3,0,1,1,,
21236,CC002,478x479,1,0,0,1/12/18,1/12/18,2/6/18,7/30/18,6,199,199,,,NA,21,4,8/21/18,2,1,1,1 FD,3,1,1,1,1 FD,
21236,CC002,478x479,1,0,0,1/12/18,1/12/18,2/6/18,8/24/18,7,224,224,,,NA,25,2,9/18/18,1,1,0,,2,0,1,1,,
21236,CC002,478x479,1,0,0,1/12/18,1/12/18,2/6/18,9/29/18,8,260,260,,,NA,36,1,NA,0,0,1,,0,1,1,0,,
21236,CC002,480x481,1,0,0,1/25/18,1/25/18,2/20/18,4/14/18,1,79,79,,,79,NA,3,5/15/18,3,0,0,,3,0,1,1,,
21237,CC002,"481,482x483",0,1,0,7/22/17,7/22/17,8/14/17,9/25/17,1,65,65,,,65,NA,1,10/3/17,0,0,,,0,1,1,0,1 missing,
21236,CC002,"482,483x484",0,1,0,1/23/18,1/23/18,2/20/18,4/15/18,1,82,82,,,82,NA,4,NA,0,0,4,missing,0,4,1,0,missing,
21236,CC002,"482,483x484",0,1,0,1/23/18,1/23/18,2/20/18,4/20/18,2,87,87,,,NA,NA,1,NA,0,0,1,missing,0,1,1,0,missing,
21236,CC002,"482,483x484",0,1,0,1/23/18,1/23/18,2/20/18,5/7/18,3,104,104,,,NA,NA,4,5/30/18,1,3,0,,4,0,1,1,,
21236,CC002,"482,483x484",0,1,0,1/23/18,1/23/18,2/20/18,5/29/18,4,126,126,,,NA,NA,7,6/19/18,2,2,3,3 BD,4,3,1,1,3 BD,
21236,CC002,"482,483x484",0,1,0,1/23/18,1/23/18,2/20/18,8/14/18,5,203,203,,,NA,NA,9,9/5/18,4,4,1,482 missing 7/17/18,8,1,1,1,482 missing 7/17/18,
21237,CC002,"484,485x486",0,1,0,8/15/17,8/15/17,9/8/17,11/13/17,1,90,90,,,90,NA,4,12/4/17,2,1,,,3,1,1,1,1 BD,
21237,CC002,"484,485x486",0,1,0,8/15/17,8/15/17,9/8/17,11/27/17,2,104,104,,,NA,NA,2,NA,0,0,,,0,2,1,0,1 BD; 1 FD,
21237,CC002,"484,485x486",0,1,0,8/15/17,8/15/17,9/8/17,12/19/17,3,126,126,,,NA,NA,3,1/8/18,1,2,,,3,0,1,1,,
21237,CC002,"484,485x486",0,1,0,8/15/17,8/15/17,9/8/17,1/19/18,4,157,157,,,NA,NA,8,2/19/18,5,3,,,8,0,1,1,,
21237,CC002,"484,485x486",0,1,0,8/15/17,8/15/17,9/8/17,2/25/18,5,194,194,,,NA,NA,1,3/19/18,0,1,,,1,0,1,1,,
21237,CC002,"484,485x486",0,1,0,8/15/17,8/15/17,9/8/17,3/1/18,6,198,198,,,NA,NA,1,NA,0,0,,,0,1,1,0,1 FD,
21237,CC002,"484,485x486",0,1,0,8/15/17,8/15/17,9/8/17,3/17/18,7,214,214,,,NA,NA,1,NA,NA,NA,,,NA,0,1,0,,
21236,CC002,"485,486x487",0,1,0,2/11/18,2/11/18,3/6/18,5/1/18,1,79,79,,,79,NA,9,5/30/18,3,3,3,missing,6,3,1,1,missing,
21236,CC002,"485,486x487",0,1,0,2/11/18,2/11/18,3/6/18,6/6/18,2,115,115,,,NA,NA,2,6/26/18,0,2,0,,2,0,1,1,,
21236,CC002,"485,486x487",0,1,0,2/11/18,2/11/18,3/6/18,6/8/18,3,117,117,,,NA,NA,2,NA,0,0,2,missing,0,2,1,0,missing,
21236,CC002,"485,486x487",0,1,0,2/11/18,2/11/18,3/6/18,6/15/18,4,124,124,,,NA,NA,2,7/17/18,0,2,0,,2,0,1,1,,
21236,CC002,"485,486x487",0,1,0,2/11/18,2/11/18,3/6/18,7/14/18,5,153,153,,,NA,NA,1,8/7/18,1,0,0,,1,0,1,1,,
21237,CC002,"487,488x489",0,1,0,8/15/17,8/15/17,9/5/17,10/20/17,1,66,66,,,66,NA,3,11/13/17,1,2,,,3,0,1,1,,
21237,CC002,"487,488x489",0,1,0,8/15/17,8/15/17,9/5/17,11/11/17,2,88,88,,,NA,NA,1,12/4/17,0,0,,,0,1,1,0,missing,
21237,CC002,"487,488x489",0,1,0,8/15/17,8/15/17,9/5/17,12/5/17,3,112,112,,,NA,NA,3,12/26/17,1,2,,,3,0,1,1,,
21237,CC002,"487,488x489",0,1,0,8/15/17,8/15/17,9/5/17,12/27/17,4,134,134,,,NA,NA,5,1/22/18,3,1,,,4,1,1,1,1 BD,
21237,CC002,"487,488x489",0,1,0,8/15/17,8/15/17,9/5/17,2/1/18,5,170,170,,,NA,NA,2,3/12/18,0,0,,,0,2,1,0,missing,
21236,CC002,"488,489x490",0,1,0,2/28/18,2/28/18,3/20/18,NA,1,NA,NA,,,NA,NA,0,NA,0,0,0,nonproductive,0,0,1,0,nonproductive,
21237,CC002,"490,491x492",0,1,0,8/29/17,8/29/17,9/25/17,11/2/17,1,65,65,,,65,NA,5,11/27/17,4,1,,,5,0,1,1,,
21237,CC002,"490,491x492",0,1,0,8/29/17,8/29/17,9/25/17,11/13/17,2,76,76,,,NA,NA,5,12/4/17,2,2,,,4,1,1,1,1 born dead,
21237,CC002,"490,491x492",0,1,0,8/29/17,8/29/17,9/25/17,12/5/17,3,98,98,,,NA,NA,8,12/26/17,5,3,,,8,0,1,1,,
21237,CC002,"490,491x492",0,1,0,8/29/17,8/29/17,9/25/17,1/20/18,4,144,144,,,NA,NA,8,2/19/18,5,3,,,8,0,1,1,,
21236,CC002,"491,492x493",0,1,0,2/26/18,2/26/18,3/20/18,6/9/18,1,103,103,,,103,NA,6,7/3/18,4,2,0,,6,0,1,1,,
21236,CC002,"491,492x493",0,1,0,2/26/18,2/26/18,3/20/18,7/9/18,2,133,133,,,NA,NA,5,NA,0,0,5,missing,0,5,1,0,missing,
21236,CC002,"491,492x493",0,1,0,2/26/18,2/26/18,3/20/18,8/12/18,3,167,167,,,NA,NA,7,9/5/18,4,3,0,,7,0,1,1,,
21236,CC002,"491,492x493",0,1,0,2/26/18,2/26/18,3/20/18,9/1/18,4,187,187,,,NA,NA,5,9/25/18,3,2,0,,5,0,1,1,,
21237,CC002,"493,494x495",0,1,0,9/3/17,9/3/17,9/25/17,11/20/17,1,78,78,,,78,NA,9,12/11/17,4,5,,,9,0,1,1,495 FD 12/27/17,
21237,CC002,"493,494x495",0,1,0,9/3/17,9/3/17,9/25/17,1/3/18,2,122,122,,,NA,NA,5,NA,0,0,,,0,5,1,0,,
21236,CC002,"494,495x496",0,1,0,3/7/17,3/7/17,4/3/18,6/10/18,1,460,460,,,460,NA,2,7/3/18,1,1,0,LNR,2,0,1,1,LNR,
21236,CC002,"494,495x496",0,1,0,3/7/17,3/7/17,4/3/18,6/23/18,2,473,473,,,NA,NA,6,7/17/18,5,1,0,,6,0,1,1,,
21236,CC002,"494,495x496",0,1,0,3/7/17,3/7/17,4/3/18,7/4/18,3,484,484,,,NA,NA,3,7/31/18,3,0,0,,3,0,1,1,,
21236,CC002,"494,495x496",0,1,0,3/7/17,3/7/17,4/3/18,7/20/18,4,500,500,,,NA,NA,3,8/14/18,1,2,0,,3,0,1,1,,
21236,CC002,"494,495x496",0,1,0,3/7/17,3/7/17,4/3/18,8/12/18,5,523,523,,,NA,NA,3,9/5/18,0,1,2,2 FD; 4 missing,1,2,1,1,2 FD; 4 missing,
21236,CC002,"494,495x496",0,1,0,3/7/17,3/7/17,4/3/18,8/20/18,6,531,531,,,NA,NA,4,9/18/18,1,3,0,,4,0,1,1,,
21237,CC002,"496,497x498",0,1,0,9/11/17,9/11/17,10/2/17,11/23/17,1,73,73,,,73,NA,5,12/11/17,3,2,0,,5,0,1,1,,
21237,CC002,"496,497x498",0,1,0,9/11/17,9/11/17,10/2/17,12/14/17,2,94,94,,,NA,NA,7,1/18/18,4,3,0,,7,0,1,1,,
21237,CC002,"496,497x498",0,1,0,9/11/17,9/11/17,10/2/17,1/22/18,3,133,133,,,NA,NA,2,2/19/18,1,0,1,1 missing,1,1,1,1,1 missing,
21237,CC002,"496,497x498",0,1,0,9/11/17,9/11/17,10/2/17,1/28/18,4,139,139,,,NA,NA,1,2/19/18,0,1,0,,1,0,1,1,,
21237,CC002,"496,497x498",0,1,0,9/11/17,9/11/17,10/2/17,2/12/18,5,154,154,,,NA,NA,2,3/5/18,0,2,0,,2,0,1,1,,
21237,CC002,"496,497x498",0,1,0,9/11/17,9/11/17,10/2/17,2/19/18,6,161,161,,,NA,NA,4,3/12/18,1,1,2,2 missing,2,2,1,1,2 missing,
21237,CC002,"496,497x498",0,1,0,9/11/17,9/11/17,10/2/17,3/5/18,7,175,175,,,NA,NA,2,3/26/18,1,1,0,,2,0,1,1,,
21237,CC002,"496,497x498",0,1,0,9/11/17,9/11/17,10/2/17,3/26/18,8,196,196,,,NA,NA,2,NA,0,0,2,missing,0,2,1,0,missing,
21236,CC002,"497,498x499",0,1,0,3/21/18,3/21/18,4/10/18,6/1/18,1,72,72,6/3/18,,72,NA,11,6/26/18,5,4,2,1 BD,9,2,2,2,1 BD,
21236,CC002,"497,498x499",0,1,0,3/21/18,3/21/18,4/10/18,6/25/18,2,96,96,6/28/18,,NA,NA,6,7/17/18,1,3,2,,4,2,2,2,,
21236,CC002,"497,498x499",0,1,0,3/21/18,3/21/18,4/10/18,7/15/18,3,116,116,,,NA,NA,8,8/7/18,2,3,3,2 BD; 1 missing,5,3,1,1,2 BD; 1 missing,
21236,CC002,"497,498x499",0,1,0,3/21/18,3/21/18,4/10/18,8/5/18,4,137,137,,,NA,NA,4,8/28/18,1,2,1,1 female AH,3,1,1,1,1 female AH,
21236,CC002,"497,498x499",0,1,0,3/21/18,3/21/18,4/10/18,8/19/18,5,151,151,,,NA,NA,6,9/8/18,2,4,0,,6,0,1,1,,
21237,CC002,"499,500x501",0,1,0,9/2/17,9/2/17,10/2/17,11/17/17,1,76,76,,,76,NA,5,12/11/17,2,3,,,5,0,1,1,499 severe derm 1/4/18,
21237,CC002,"499,500x501",0,1,0,9/2/17,9/2/17,10/2/17,1/7/18,2,127,127,,,NA,NA,2,1/29/18,0,2,,,2,0,1,1,,
21236,CC002,"500,501x502",0,1,0,3/19/18,3/19/18,4/10/18,NA,1,NA,NA,,,NA,NA,0,NA,0,0,0,nonproductive,0,0,1,0,nonproductive,
21237,CC002,"502,503x504",0,1,0,9/5/17,9/5/17,10/2/17,11/13/17,1,69,69,,,69,NA,5,12/4/17,2,1,,,3,2,1,1,2 missing,
21237,CC002,"502,503x504",0,1,0,9/5/17,9/5/17,10/2/17,12/16/17,2,102,102,12/18/17,,NA,NA,4,1/8/18,1,3,,,4,0,2,2,,
21237,CC002,"502,503x504",0,1,0,9/5/17,9/5/17,10/2/17,1/8/18,3,125,125,,,NA,NA,4,1/29/18,2,2,,,4,0,1,1,,
21237,CC002,"502,503x504",0,1,0,9/5/17,9/5/17,10/2/17,2/9/18,4,157,157,,,NA,NA,6,3/5/18,1,5,,,6,0,1,1,504 AH 4/30/18,
21236,CC002,"503,504x505",0,1,0,4/7/18,4/7/18,5/1/18,6/19/18,1,73,73,,,73,NA,5,7/17/18,3,2,0,,5,0,1,1,,
21236,CC002,"503,504x505",0,1,0,4/7/18,4/7/18,5/1/18,7/16/18,2,100,100,,,NA,NA,1,NA,0,0,1,1 BD,0,1,1,0,1 BD,
21236,CC002,"503,504x505",0,1,0,4/7/18,4/7/18,5/1/18,8/13/18,3,128,128,,,NA,NA,4,9/5/18,3,1,0,,4,0,1,1,,
21236,CC002,"503,504x505",0,1,0,4/7/18,4/7/18,5/1/18,9/5/18,4,151,151,,,NA,NA,7,9/25/18,1,6,0,503 hydro 6/5/18,7,0,1,1,503 hydro 6/5/18,
21237,CC002,505x506,1,0,0,9/5/17,9/5/17,10/2/17,10/21/17,1,46,46,,,46,NA,2,10/31/17,0,0,,,0,2,1,0,2 FD,
21236,CC002,"506,507x508",0,1,0,4/7/18,4/7/18,5/1/18,6/17/18,1,71,71,,,71,NA,4,7/17/18,1,2,1,1 BD,3,1,1,1,1 BD,
21236,CC002,"506,507x508",0,1,0,4/7/18,4/7/18,5/1/18,6/30/18,2,84,84,,,NA,NA,3,7/24/18,2,1,0,,3,0,1,1,,
21236,CC002,"506,507x508",0,1,0,4/7/18,4/7/18,5/1/18,8/14/18,3,129,129,,,NA,NA,5,9/5/18,3,1,1,,4,1,1,1,,
21237,CC002,"507,508x509",0,1,0,10/1/17,10/1/17,11/6/17,12/19/17,1,79,79,,,79,NA,2,1/8/18,0,0,,,0,2,1,0,missing,
21237,CC002,"507,508x509",0,1,0,10/1/17,10/1/17,11/6/17,1/4/18,2,95,95,1/7/18,,NA,NA,9,1/29/18,5,4,,,9,0,2,2,,
21237,CC002,"507,508x509",0,1,0,10/1/17,10/1/17,11/6/17,1/29/18,3,120,120,,,NA,NA,3,2/26/18,2,1,,,3,0,1,1,,
21237,CC002,"507,508x509",0,1,0,10/1/17,10/1/17,11/6/17,2/19/18,4,141,141,,,NA,NA,4,3/12/18,2,2,,,4,0,1,1,,
21237,CC002,"507,508x509",0,1,0,10/1/17,10/1/17,11/6/17,3/12/18,5,162,162,,,NA,NA,4,4/9/18,0,1,,,1,3,1,1,3 missing,
21237,CC002,"507,508x509",0,1,0,10/1/17,10/1/17,11/6/17,4/1/18,6,182,182,,,NA,NA,3,4/27/18,2,1,,,3,0,1,1,1 female AH,
21237,CC002,"507,508x509",0,1,0,10/1/17,10/1/17,11/6/17,4/22/18,7,203,203,,,NA,NA,2,5/14/18,1,1,,,2,0,1,1,,
21237,CC002,"507,508x509",0,1,0,10/1/17,10/1/17,11/6/17,5/14/18,8,225,225,,,NA,NA,2,5/29/18,0,0,,,0,2,1,0,missing,
21236,CC002,509x510,1,0,0,5/7/18,5/7/18,5/30/18,7/17/18,1,71,71,,,71,NA,8,8/7/18,2,6,0,,8,0,1,1,,
21236,CC002,509x510,1,0,0,5/7/18,5/7/18,5/30/18,9/25/18,2,141,141,,,NA,70,5,NA,0,0,5,,0,5,1,0,,
21237,CC002,"510,511x512",0,1,0,10/11/17,10/11/17,11/6/17,12/26/17,1,76,76,,,76,NA,2,1/15/18,0,1,,,1,1,1,1,,
21237,CC002,"510,511x512",0,1,0,10/11/17,10/11/17,11/6/17,1/6/18,2,87,87,,,NA,NA,3,NA,0,0,,,0,3,1,0,3 BD,
21237,CC002,"510,511x512",0,1,0,10/11/17,10/11/17,11/6/17,1/24/18,3,105,105,,,NA,NA,2,2/19/18,1,1,,,2,0,1,1,,
21237,CC002,"510,511x512",0,1,0,10/11/17,10/11/17,11/6/17,2/14/18,4,126,126,,,NA,NA,5,3/5/18,3,0,,,3,2,1,1,2 missing,
21237,CC002,"510,511x512",0,1,0,10/11/17,10/11/17,11/6/17,3/5/18,5,145,145,,,NA,NA,3,3/26/18,0,3,,,3,0,1,1,,
21236,CC002,"511,512x513",0,1,0,5/7/18,5/7/18,5/30/18,7/26/18,1,80,80,,,80,NA,5,8/14/18,2,3,0,,5,0,1,1,,
21236,CC002,"511,512x513",0,1,0,5/7/18,5/7/18,5/30/18,9/5/18,2,121,121,,,NA,NA,4,10/2/18,1,3,0,,4,0,1,1,,
21236,CC002,"511,512x513",0,1,0,5/7/18,5/7/18,5/30/18,9/24/18,3,140,140,,,NA,NA,3,NA,0,0,3,2 FD; 4 missing,0,3,1,0,2 FD; 4 missing,
21237,CC002,"513,514x515",0,1,0,10/3/17,10/3/17,11/13/17,12/5/17,1,63,63,,,63,NA,1,12/15/17,0,0,,,0,1,1,0,1 missing,
21237,CC002,"513,514x515",0,1,0,10/3/17,10/3/17,11/13/17,12/16/17,2,74,74,,,NA,NA,6,1/8/18,1,4,,,5,1,1,1,1 missing,
21237,CC002,"513,514x515",0,1,0,10/3/17,10/3/17,11/13/17,12/26/17,3,84,84,,,NA,NA,2,1/15/18,0,1,,,1,1,1,1,,
21237,CC002,"513,514x515",0,1,0,10/3/17,10/3/17,11/13/17,1/16/18,4,105,105,,,NA,NA,6,2/19/18,3,3,,,6,0,1,1,,
21237,CC002,"513,514x515",0,1,0,10/3/17,10/3/17,11/13/17,3/13/18,5,161,161,,,NA,NA,4,4/9/18,0,0,,,0,4,1,0,3 missing; 513 FD 5/1/18,
21236,CC002,"514,515x516",0,1,0,5/11/18,5/11/18,6/5/18,NA,1,NA,NA,,,NA,NA,0,NA,0,0,0,nonproductive 9/18/18,0,0,1,0,nonproductive 9/18/18,
21237,CC002,"516,517x518",0,1,0,10/3/17,10/3/17,11/13/17,12/11/17,1,69,69,,,69,NA,3,12/19/17,0,0,,,0,3,1,0,3 missing,
21237,CC002,"516,517x518",0,1,0,10/3/17,10/3/17,11/13/17,12/17/17,2,75,75,,,NA,NA,3,1/18/18,2,1,,,3,0,1,1,,
21237,CC002,"516,517x518",0,1,0,10/3/17,10/3/17,11/13/17,2/10/18,3,130,130,,,NA,NA,3,3/5/18,1,2,,,3,0,1,1,,
21237,CC002,"516,517x518",0,1,0,10/3/17,10/3/17,11/13/17,2/18/18,4,138,138,,,NA,NA,2,3/12/18,0,1,,,1,1,1,1,1 missing,
21237,CC002,"516,517x518",0,1,0,10/3/17,10/3/17,11/13/17,3/24/18,5,172,172,,,NA,NA,3,4/16/18,0,3,,,3,0,1,1,,
21237,CC002,"516,517x518",0,1,0,10/3/17,10/3/17,11/13/17,5/14/18,6,223,223,,,NA,NA,1,NA,0,0,,,0,1,1,0,,
21236,CC002,"517,518x519",0,1,0,7/3/18,7/3/18,7/24/18,9/5/18,1,64,64,,,64,NA,8,10/2/18,3,4,1,1 wd,7,1,1,1,1 wd,
21236,CC002,"517,518x519",0,1,0,7/3/18,7/3/18,7/24/18,9/12/18,2,71,71,,,NA,NA,5,10/9/18,2,3,0,,5,0,1,1,,
21237,CC002,"519,520x521",0,1,0,11/13/17,11/13/17,12/4/17,2/9/18,1,88,88,2/15/18,,88,NA,8,3/5/18,5,3,,,8,0,2,2,,
21237,CC002,"519,520x521",0,1,0,11/13/17,11/13/17,12/4/17,3/5/18,2,112,112,,,NA,NA,3,NA,0,0,,,0,3,1,0,3 missing,
21237,CC002,"519,520x521",0,1,0,11/13/17,11/13/17,12/4/17,3/12/18,3,119,119,,,NA,NA,3,NA,0,0,,,0,3,1,0,3 missing,
21237,CC002,"519,520x521",0,1,0,11/13/17,11/13/17,12/4/17,3/24/18,4,131,131,,,NA,NA,5,NA,0,0,,,0,5,1,0,5 FD,
21237,CC002,"519,520x521",0,1,0,11/13/17,11/13/17,12/4/17,4/16/18,5,154,154,,,NA,NA,2,NA,0,0,,,0,2,1,0,2 missing,
21237,CC002,"519,520x521",0,1,0,11/13/17,11/13/17,12/4/17,5/4/18,6,172,172,,,NA,NA,3,NA,0,0,,,0,3,1,0,3 missing,
21237,CC002,"519,520x521",0,1,0,11/13/17,11/13/17,12/4/17,5/26/18,7,194,194,,,NA,NA,2,NA,0,0,,,0,2,1,0,,
21236,CC002,"520,521x522",0,1,0,6/30/18,6/30/18,7/24/18,9/8/18,1,70,70,,,70,NA,5,10/2/18,1,4,0,,5,0,1,1,,
21237,CC002,"522,523x524",0,1,0,11/13/17,11/13/17,12/4/17,NA,1,NA,NA,,,NA,NA,0,NA,0,0,,,0,0,1,0,nonproductive,
21236,CC002,"523,524x525",0,1,0,7/14/18,7/14/18,8/7/18,10/1/18,1,79,79,,,79,NA,5,NA,0,0,5,,0,5,1,0,,
21236,CC002,"523,524x525",0,1,0,7/14/18,7/14/18,8/7/18,10/8/18,2,86,86,,,NA,NA,10,NA,0,0,10,1 BD,0,10,1,0,1 BD,
21237,CC002,525x526,1,0,0,11/13/17,11/13/17,12/4/17,2/26/18,1,105,105,,,105,NA,2,3/12/18,0,0,,,0,2,1,0,missing,
21237,CC002,525x526,1,0,0,11/13/17,11/13/17,12/4/17,3/31/18,2,138,138,,,NA,33,1,4/27/18,0,1,,,1,0,1,1,,
21236,CC002,"526,527x528",0,1,0,7/15/18,7/15/18,8/7/18,9/29/18,1,76,76,,,76,NA,1,NA,0,0,1,,0,1,1,0,,
21237,CC002,"527,528x529",0,1,0,11/25/17,11/25/17,12/26/17,2/11/18,1,78,78,,,78,NA,3,3/12/18,0,3,0,,3,0,1,1,,
21237,CC002,"527,528x529",0,1,0,11/25/17,11/25/17,12/26/17,4/13/18,2,139,139,,,NA,NA,2,5/14/18,1,1,0,,2,0,1,1,,
21237,CC002,"527,528x529",0,1,0,11/25/17,11/25/17,12/26/17,5/24/18,3,180,180,,,NA,NA,3,6/18/18,2,1,0,,3,0,1,1,,
21236,CC002,"529,530x531",0,1,0,7/30/18,7/30/18,8/21/18,10/8/18,1,70,70,,,70,NA,5,NA,0,0,5,nonproductive,0,5,1,0,nonproductive,
21237,CC002,"530,531x532",0,1,0,12/14/17,12/14/17,1/8/18,2/25/18,1,73,73,,,73,NA,2,NA,0,0,2,1 missing; 1 FD,0,2,1,0,1 missing; 1 FD,
21237,CC002,"530,531x532",0,1,0,12/14/17,12/14/17,1/8/18,3/18/18,2,94,94,,,NA,NA,6,4/9/18,2,3,1,bellyspots,5,1,1,1,bellyspots,
21237,CC002,"530,531x532",0,1,0,12/14/17,12/14/17,1/8/18,5/5/18,3,142,142,,,NA,NA,3,NA,0,0,3,3 missing,0,3,1,0,3 missing,
21237,CC002,"530,531x532",0,1,0,12/14/17,12/14/17,1/8/18,7/6/18,4,204,204,,,NA,NA,4,7/30/18,1,2,1,1 BD; 530 tawny bell spots,3,1,1,1,1 BD; 530 tawny bell spots,
21236,CC002,"532,533x534",0,1,0,8/29/18,8/29/18,9/18/18,NA,1,NA,NA,,,NA,NA,0,NA,0,0,0,,0,0,1,0,,
21237,CC002,"533,534x535",0,1,0,12/18/17,12/18/17,1/8/18,3/19/18,1,91,91,,,91,NA,2,NA,0,0,2,2 missing,0,2,1,0,2 missing,
21237,CC002,"533,534x535",0,1,0,12/18/17,12/18/17,1/8/18,3/28/18,2,100,100,,,NA,NA,6,4/16/18,2,4,0,bellyspots,6,0,1,1,bellyspots,
21237,CC002,"533,534x535",0,1,0,12/18/17,12/18/17,1/8/18,4/20/18,3,123,123,,,NA,NA,1,NA,0,0,1,missing,0,1,1,0,missing,
21237,CC002,"533,534x535",0,1,0,12/18/17,12/18/17,1/8/18,5/19/18,4,152,152,,,NA,NA,8,6/11/18,4,2,2,missing,6,2,1,1,missing,
21237,CC002,"533,534x535",0,1,0,12/18/17,12/18/17,1/8/18,6/10/18,5,174,174,,,NA,NA,4,7/2/18,1,2,1,1 missing,3,1,1,1,1 missing,
21236,CC002,535x536,1,0,0,8/24/18,8/24/18,9/18/18,NA,1,NA,NA,,,NA,NA,0,NA,0,0,0,,0,0,1,0,,
21237,CC002,"536,537x538",0,1,0,11/21/17,11/21/17,1/15/18,2/10/18,1,81,81,,,81,NA,5,3/5/18,2,3,0,,5,0,1,1,,
21237,CC002,"536,537x538",0,1,0,11/21/17,11/21/17,1/15/18,3/13/18,2,112,112,,,NA,NA,3,4/2/18,2,1,0,,3,0,1,1,,
21237,CC002,"536,537x538",0,1,0,11/21/17,11/21/17,1/15/18,3/22/18,3,121,121,,,NA,NA,1,4/9/18,1,0,0,,1,0,1,1,,
21237,CC002,"536,537x538",0,1,0,11/21/17,11/21/17,1/15/18,4/2/18,4,132,132,,,NA,NA,7,4/27/18,6,1,0,,7,0,1,1,,
21237,CC002,"536,537x538",0,1,0,11/21/17,11/21/17,1/15/18,5/30/18,5,190,190,,,NA,NA,2,6/18/18,1,1,0,,2,0,1,1,,
21237,CC002,"536,537x538",0,1,0,11/21/17,11/21/17,1/15/18,6/12/18,6,203,203,,,NA,NA,3,7/2/18,1,2,0,,3,0,1,1,,
21237,CC002,"536,537x538",0,1,0,11/21/17,11/21/17,1/15/18,7/3/18,7,224,224,,,NA,NA,6,7/27/18,0,6,0,,6,0,1,1,,
21236,CC002,"537,538x539",0,1,0,8/19/18,8/19/18,9/18/18,NA,1,NA,NA,,,NA,NA,0,NA,0,0,0,,0,0,1,0,,
21237,CC002,"539,540x541",0,1,0,11/21/17,11/21/17,1/15/18,2/10/18,1,81,81,,,81,NA,7,3/5/18,3,4,0,,7,0,1,1,,
21237,CC002,"539,540x541",0,1,0,11/21/17,11/21/17,1/15/18,3/5/18,2,104,104,,,NA,NA,1,NA,0,0,1,missing,0,1,1,0,missing,
21237,CC002,"539,540x541",0,1,0,11/21/17,11/21/17,1/15/18,4/6/18,3,136,136,,,NA,NA,4,4/27/18,2,2,0,,4,0,1,1,,
21237,CC002,"539,540x541",0,1,0,11/21/17,11/21/17,1/15/18,5/31/18,4,191,191,,,NA,NA,3,6/18/18,2,1,0,,3,0,1,1,,
21237,CC002,"539,540x541",0,1,0,11/21/17,11/21/17,1/15/18,6/5/18,5,196,196,,,NA,NA,3,6/25/18,2,1,0,,3,0,1,1,,
21237,CC002,"539,540x541",0,1,0,11/21/17,11/21/17,1/15/18,6/28/18,6,219,219,,,NA,NA,5,7/23/18,2,3,0,,5,0,1,1,,
21237,CC002,"539,540x541",0,1,0,11/21/17,11/21/17,1/15/18,7/16/18,7,237,237,,,NA,NA,1,NA,0,0,1,missing,0,1,1,0,missing,
21236,CC002,540x541,1,0,0,8/20/18,8/20/18,9/18/18,NA,1,NA,NA,,,NA,NA,0,NA,0,0,0,,0,0,1,0,,
21237,CC002,"542,543x544",0,1,0,1/28/18,1/28/18,2/26/18,4/10/18,1,72,72,,,72,NA,6,4/30/18,3,3,0,,6,0,1,1,,
21237,CC002,"542,543x544",0,1,0,1/28/18,1/28/18,2/26/18,5/1/18,2,93,93,,,NA,NA,5,5/29/18,3,2,0,,5,0,1,1,,
21237,CC002,"542,543x544",0,1,0,1/28/18,1/28/18,2/26/18,5/22/18,3,114,114,,,NA,NA,5,6/11/18,0,1,4,4 missing,1,4,1,1,4 missing,
21237,CC002,"542,543x544",0,1,0,1/28/18,1/28/18,2/26/18,6/8/18,4,131,131,6/12/18,,NA,NA,7,7/2/18,5,2,0,,7,0,2,2,,
21237,CC002,"542,543x544",0,1,0,1/28/18,1/28/18,2/26/18,6/30/18,5,153,153,,,NA,NA,4,7/23/18,3,1,0,,4,0,1,1,,
21237,CC002,"542,543x544",0,1,0,1/28/18,1/28/18,2/26/18,7/4/18,6,157,157,,,NA,NA,1,NA,0,0,1,missing,0,1,1,0,missing,
21236,CC002,542x543,1,0,0,9/5/18,9/5/18,10/2/18,NA,1,NA,NA,,,NA,NA,0,NA,0,0,0,,0,0,1,0,,
21237,CC002,"548,549x550",0,1,0,2/13/18,2/13/18,3/5/18,4/22/18,1,68,68,,,68,NA,2,5/14/18,0,0,2,missing,0,2,1,0,missing,
21237,CC002,"548,549x550",0,1,0,2/13/18,2/13/18,3/5/18,5/22/18,2,98,98,5/25/18,,NA,NA,7,6/11/18,2,5,0,,7,0,2,2,,
21237,CC002,"548,549x550",0,1,0,2/13/18,2/13/18,3/5/18,6/12/18,3,119,119,,,NA,NA,6,7/2/18,3,1,2,2 BD; 1 missing,4,2,1,1,2 BD; 1 missing,
21237,CC002,"548,549x550",0,1,0,2/13/18,2/13/18,3/5/18,6/15/18,4,122,122,,,NA,NA,4,7/17/18,2,2,0,,4,0,1,1,,
21237,CC002,"548,549x550",0,1,0,2/13/18,2/13/18,3/5/18,7/2/18,5,139,139,,,NA,NA,7,7/23/18,1,1,5,2 FD; 2 BD 1 missing,2,5,1,1,2 FD; 2 BD 1 missing,
21237,CC002,"548,549x550",0,1,0,2/13/18,2/13/18,3/5/18,8/14/18,6,182,182,,,NA,NA,8,9/4/18,5,2,1,1 missing,7,1,1,1,1 missing,
21237,CC002,"548,549x550",0,1,0,2/13/18,2/13/18,3/5/18,8/17/18,7,185,185,,,NA,NA,5,9/17/18,2,3,0,,5,0,1,1,,
21237,CC002,"551,552x553",0,1,0,2/15/18,2/15/18,3/5/18,4/23/18,1,67,67,,,67,NA,1,NA,0,0,1,missing,0,1,1,0,missing,
21237,CC002,"551,552x553",0,1,0,2/15/18,2/15/18,3/5/18,5/23/18,2,97,97,,,NA,NA,6,6/11/18,2,4,0,,6,0,1,1,,
21237,CC002,"551,552x553",0,1,0,2/15/18,2/15/18,3/5/18,6/14/18,3,119,119,,,NA,NA,4,7/12/18,1,3,0,,4,0,1,1,,
21237,CC002,"551,552x553",0,1,0,2/15/18,2/15/18,3/5/18,7/3/18,4,138,138,,,NA,NA,3,7/23/18,1,1,1,missing,2,1,1,1,missing,
21237,CC002,"551,552x553",0,1,0,2/15/18,2/15/18,3/5/18,7/27/18,5,162,162,,,NA,NA,3,8/17/18,0,2,1,missing,2,1,1,1,missing,
21237,CC002,"551,552x553",0,1,0,2/15/18,2/15/18,3/5/18,9/16/18,6,213,213,,,NA,NA,1,NA,0,0,1,,0,1,1,0,,
21237,CC002,554x555,1,0,0,2/9/18,2/9/18,3/5/18,5/20/18,1,100,100,,,100,NA,4,6/11/18,0,4,0,,4,0,1,1,,
21237,CC002,554x555,1,0,0,2/9/18,2/9/18,3/5/18,6/11/18,2,122,122,,,NA,22,6,7/2/18,1,2,3,3 missing,3,3,1,1,3 missing,
21237,CC002,"556,557x558",0,1,0,2/10/18,2/10/18,3/5/18,5/25/18,1,104,104,,,104,NA,5,6/18/18,1,4,0,,5,0,1,1,,
21237,CC002,"556,557x558",0,1,0,2/10/18,2/10/18,3/5/18,6/10/18,2,120,120,,,NA,NA,2,7/2/18,2,0,0,,2,0,1,1,,
21237,CC002,"556,557x558",0,1,0,2/10/18,2/10/18,3/5/18,7/2/18,3,142,142,,,NA,NA,4,7/23/18,1,3,0,,4,0,1,1,,
21237,CC002,"556,557x558",0,1,0,2/10/18,2/10/18,3/5/18,8/22/18,4,193,193,,,NA,NA,2,NA,0,0,2,,0,2,1,0,,
21237,CC002,567x568,1,0,0,4/10/18,4/10/18,4/30/18,NA,1,NA,NA,,,NA,NA,0,NA,0,0,,,0,0,1,0,567 FD 5/9/18,
20947,CC002,"615,616x617",0,1,0,8/17/17,8/17/17,9/18/17,10/31/17,1,75,75,11/5/17,,75,NA,10,11/27/17,7,2,,,9,1,2,2,,
20947,CC002,"615,616x617",0,1,0,8/17/17,8/17/17,9/18/17,12/11/17,2,116,116,,,NA,NA,6,1/8/18,2,3,,,5,1,1,1,,
20947,CC002,"615,616x617",0,1,0,8/17/17,8/17/17,9/18/17,12/22/17,3,127,127,,,NA,NA,4,NA,0,0,,,0,4,1,0,missing,
20947,CC002,"615,616x617",0,1,0,8/17/17,8/17/17,9/18/17,1/12/18,4,148,148,,,NA,NA,4,2/5/18,2,2,,,4,0,1,1,,
20947,CC002,"615,616x617",0,1,0,8/17/17,8/17/17,9/18/17,2/1/18,5,168,168,,,NA,NA,2,NA,0,0,,,0,2,1,0,missing,
20947,CC002,"674,675x676",0,1,0,1/5/18,1/5/18,1/22/18,NA,1,NA,NA,,,NA,NA,0,NA,0,0,,,0,0,1,0,nonproductive,
21237,CC003,"01,02x03",0,1,0,3/28/17,3/28/17,4/26/17,6/12/17,1,76,76,,,76,NA,5,7/5/17,3,2,0,,5,0,1,1,,
21237,CC003,"01,02x03",0,1,0,3/28/17,3/28/17,4/26/17,6/18/17,2,82,82,,,NA,NA,1,7/13/17,0,1,0,,1,0,1,1,,
21237,CC003,"01,02x03",0,1,0,3/28/17,3/28/17,4/26/17,7/10/17,3,104,104,,,NA,NA,8,8/2/17,3,5,0,,8,0,1,1,,
21237,CC003,"01,02x03",0,1,0,3/28/17,3/28/17,4/26/17,8/25/17,4,150,150,,,NA,NA,2,9/12/17,1,1,0,,2,0,1,1,,
21237,CC003,"01,02x03",0,1,0,3/28/17,3/28/17,4/26/17,9/15/17,5,171,171,,,NA,NA,3,10/8/17,1,2,0,,3,0,1,1,,
21237,CC003,"01,02x03",0,1,0,3/28/17,3/28/17,4/26/17,9/30/17,6,186,186,,,NA,NA,3,10/23/17,2,1,0,,3,0,1,1,,
21237,CC003,"04,05x06",0,1,0,3/28/17,3/28/17,4/2/17,5/30/17,1,63,63,,,63,NA,2,6/23/17,0,2,,,2,0,1,1,,
21237,CC003,"04,05x06",0,1,0,3/28/17,3/28/17,4/2/17,7/20/17,2,114,114,,,NA,NA,4,8/7/17,2,2,,,4,0,1,1,,
21237,CC003,"04,05x06",0,1,0,3/28/17,3/28/17,4/2/17,9/2/17,3,158,158,,,NA,NA,6,9/26/17,2,4,,,6,0,1,1,,
21237,CC003,"04,05x06",0,1,0,3/28/17,3/28/17,4/2/17,10/18/17,4,204,204,,,NA,NA,2,11/13/17,1,1,,,2,0,1,1,,
21237,CC003,"04,05x06",0,1,0,3/28/17,3/28/17,4/2/17,11/21/17,5,238,238,,,NA,NA,4,12/18/17,1,1,,,2,2,1,1,2 missing,
21237,CC003,"06,07x08",0,1,0,6/12/17,6/12/17,7/5/17,9/5/17,1,85,85,,,85,NA,5,9/26/17,1,1,,,2,3,1,1,,
21237,CC003,"06,07x08",0,1,0,6/12/17,6/12/17,7/5/17,9/26/17,2,106,106,,,NA,NA,5,10/11/17,2,2,,,4,1,1,1,,
21237,CC003,"06,07x08",0,1,0,6/12/17,6/12/17,7/5/17,10/18/17,3,128,128,,,NA,NA,3,11/13/17,1,1,,,2,1,1,1,,
21237,CC003,"06,07x08",0,1,0,6/12/17,6/12/17,7/5/17,11/1/17,4,142,142,,,NA,NA,5,NA,0,0,,,0,5,1,0,,
21237,CC003,"06,07x08",0,1,0,6/12/17,6/12/17,7/5/17,11/6/17,5,147,147,,,NA,NA,6,11/29/17,1,4,,,5,1,1,1,,
21237,CC003,"06,07x08",0,1,0,6/12/17,6/12/17,7/5/17,11/28/17,6,169,169,,,NA,NA,3,NA,0,0,,,0,3,1,0,,
21237,CC003,"06,07x08",0,1,0,6/12/17,6/12/17,7/5/17,12/1/17,7,172,172,,,NA,NA,4,NA,0,0,,,0,4,1,0,,
21237,CC003,09x10,1,0,0,6/12/17,6/12/17,7/5/17,8/21/17,1,70,70,,,70,NA,1,9/12/17,0,1,0,,1,0,1,1,,
21237,CC003,09x10,1,0,0,6/12/17,6/12/17,7/5/17,9/11/17,2,91,91,,,NA,21,6,10/3/17,2,4,0,,6,0,1,1,,
21237,CC003,09x10,1,0,0,6/12/17,6/12/17,7/5/17,10/4/17,3,114,114,,,NA,23,5,10/23/17,2,3,0,,5,0,1,1,,
21237,CC003,09x10,1,0,0,6/12/17,6/12/17,7/5/17,10/24/17,4,134,134,,,NA,20,7,11/20/17,2,5,0,,7,0,1,1,,
21237,CC003,"11,12x13",0,1,0,7/10/17,7/10/17,8/2/17,9/13/17,1,65,65,,,65,NA,6,10/3/17,2,4,0,,6,0,1,1,,
21237,CC003,"11,12x13",0,1,0,7/10/17,7/10/17,8/2/17,9/17/17,2,69,69,,,NA,NA,3,10/8/17,2,1,0,,3,0,1,1,,
21237,CC003,"11,12x13",0,1,0,7/10/17,7/10/17,8/2/17,10/10/17,3,92,92,,,NA,NA,8,11/7/17,5,3,0,,8,0,1,1,,
21237,CC003,14x15,1,0,0,7/10/17,7/10/17,8/2/17,9/19/17,1,71,71,,,71,NA,1,10/8/17,0,1,0,,1,0,1,1,,
21237,CC003,14x15,1,0,0,7/10/17,7/10/17,8/2/17,10/9/17,2,91,91,,,NA,20,3,10/30/17,0,1,2,2 missing,1,2,1,1,2 missing,
21237,CC003,14x15,1,0,0,7/10/17,7/10/17,8/2/17,10/30/17,3,112,112,,,NA,21,2,NA,0,0,2,wet box 11/16/17,0,2,1,0,wet box 11/16/17,
21237,CC003,16x17,1,0,0,7/20/17,7/20/17,9/6/17,9/26/17,1,68,68,,,68,NA,3,10/18/17,2,1,0,,3,0,1,1,,
21237,CC003,16x17,1,0,0,7/20/17,7/20/17,9/6/17,11/5/17,2,108,108,,,NA,40,2,12/5/17,1,1,0,,2,0,1,1,,
21237,CC003,16x17,1,0,0,7/20/17,7/20/17,9/6/17,11/24/17,3,127,127,,,NA,19,4,12/18/17,1,3,0,,4,0,1,1,,
21237,CC003,16x17,1,0,0,7/20/17,7/20/17,9/6/17,2/11/18,4,206,206,,,NA,79,7,3/14/18,2,5,0,,7,0,1,1,,
21237,CC003,18x19,1,0,0,7/20/17,7/20/17,9/6/17,10/24/17,1,96,96,,,96,NA,3,11/22/17,1,1,1,1 missing,2,1,1,1,1 missing,
21237,CC003,18x19,1,0,0,7/20/17,7/20/17,9/6/17,12/7/17,2,140,140,,,NA,44,2,1/2/18,0,2,0,,2,0,1,1,,
21237,CC003,20x21,1,0,0,8/25/17,8/25/17,10/8/17,11/5/17,1,72,72,,,72,NA,5,12/5/17,2,2,,,4,1,1,1,1 missing,
21237,CC003,20x21,1,0,0,8/25/17,8/25/17,10/8/17,12/14/17,2,111,111,,,NA,39,1,1/16/18,0,0,,,0,1,1,0,1 missing,
21237,CC003,20x21,1,0,0,8/25/17,8/25/17,10/8/17,2/4/18,3,163,163,,,NA,52,3,3/5/18,2,1,,,3,0,1,1,LNR,
21237,CC003,20x21,1,0,0,8/25/17,8/25/17,10/8/17,3/25/18,4,212,212,,,NA,49,1,4/24/18,0,1,,,1,0,1,1,,
21237,CC003,22x23,1,0,0,9/5/17,9/5/17,10/17/17,2/2/18,1,150,150,,,150,NA,2,2/26/18,0,2,0,,2,0,1,1,,
21237,CC003,"24,25x26",0,1,0,9/2/17,9/2/17,10/17/17,12/13/17,1,102,102,,,102,NA,3,1/18/18,2,1,0,,3,0,1,1,,
21237,CC003,"24,25x26",0,1,0,9/2/17,9/2/17,10/17/17,1/20/18,2,140,140,,,NA,NA,1,NA,0,0,1,1 missing,0,1,1,0,1 missing,
21237,CC003,"24,25x26",0,1,0,9/2/17,9/2/17,10/17/17,1/31/18,3,151,151,,,NA,NA,3,3/2/18,1,2,0,,3,0,1,1,,
21237,CC003,"27,28x29",0,1,0,9/13/17,9/13/17,10/30/17,11/24/17,1,72,72,,,72,NA,7,12/18/17,2,5,,,7,0,1,1,,
21237,CC003,"27,28x29",0,1,0,9/13/17,9/13/17,10/30/17,12/18/17,2,96,96,,,NA,NA,5,1/18/18,4,1,,,5,0,1,1,,
21237,CC003,"27,28x29",0,1,0,9/13/17,9/13/17,10/30/17,1/9/18,3,118,118,,,NA,NA,4,1/30/18,1,1,,,2,2,1,1,2 missing,
21237,CC003,"27,28x29",0,1,0,9/13/17,9/13/17,10/30/17,1/28/18,4,137,137,,,NA,NA,2,2/26/18,1,1,,,2,0,1,1,,
21237,CC003,"27,28x29",0,1,0,9/13/17,9/13/17,10/30/17,2/18/18,5,158,158,,,NA,NA,2,3/28/18,1,1,,,2,0,1,1,,
21237,CC003,"27,28x29",0,1,0,9/13/17,9/13/17,10/30/17,4/20/18,6,219,219,,,NA,NA,2,5/9/18,0,2,,,2,0,1,1,,
21237,CC003,"30,31x32",0,1,0,9/11/17,9/11/17,10/30/17,11/23/17,1,73,73,,,73,NA,8,12/8/17,2,6,0,,8,0,1,1,,
21237,CC003,"30,31x32",0,1,0,9/11/17,9/11/17,10/30/17,12/18/17,2,98,98,,,NA,NA,3,1/18/18,1,1,1,1 FD; 2 missing,2,1,1,1,1 FD; 2 missing,
21237,CC003,"30,31x32",0,1,0,9/11/17,9/11/17,10/30/17,1/6/18,3,117,117,,,NA,NA,1,1/30/18,1,0,0,,1,0,1,1,,
21237,CC003,"30,31x32",0,1,0,9/11/17,9/11/17,10/30/17,1/12/18,4,123,123,,,NA,NA,5,1/30/18,2,3,0,,5,0,1,1,,
21237,CC003,"36,37x38",0,1,0,10/10/17,10/10/17,11/29/17,12/23/17,1,74,74,,,74,NA,3,1/18/18,2,1,0,,3,0,1,1,,
21237,CC003,"36,37x38",0,1,0,10/10/17,10/10/17,11/29/17,12/26/17,2,77,77,,,NA,NA,2,NA,0,0,2,missing,0,2,1,0,missing,
21237,CC003,"36,37x38",0,1,0,10/10/17,10/10/17,11/29/17,1/11/18,3,93,93,,,NA,NA,5,NA,0,0,5,5 missing,0,5,1,0,5 missing,
21237,CC003,"36,37x38",0,1,0,10/10/17,10/10/17,11/29/17,1/16/18,4,98,98,,,NA,NA,4,2/12/18,0,1,3,3 missing,1,3,1,1,3 missing,
21237,CC003,"36,37x38",0,1,0,10/10/17,10/10/17,11/29/17,3/6/18,5,147,147,,,NA,NA,1,NA,0,0,1,1 missing,0,1,1,0,1 missing,
21237,CC003,"36,37x38",0,1,0,10/10/17,10/10/17,11/29/17,4/9/18,6,181,181,,,NA,NA,3,5/9/18,0,2,1,1 missing,2,1,1,1,1 missing,
21237,CC003,"36,37x38",0,1,0,10/10/17,10/10/17,11/29/17,4/29/18,7,201,201,,,NA,NA,1,NA,0,0,1,missing,0,1,1,0,missing,
20944,CC004,"01,02,03x04",0,0,1,4/19/16,4/19/16,5/20/16,6/30/16,1,72,72,,,72,NA,2,7/20/16,1,1,0,,2,0,1,1,,
20944,CC004,"01,02,03x04",0,0,1,4/19/16,4/19/16,5/20/16,8/4/16,2,107,107,,,NA,NA,6,8/26/16,1,5,0,,6,0,1,1,,
20944,CC004,05x06,1,0,0,6/30/16,6/30/16,7/20/16,9/28/16,1,90,90,,,90,NA,8,10/20/16,2,5,1,1 lost,7,1,1,1,1 lost,
20944,CC004,05x06,1,0,0,6/30/16,6/30/16,7/20/16,11/15/16,2,138,138,,,NA,48,5,12/9/16,5,0,0,,5,0,1,1,,
20944,CC004,05x06,1,0,0,6/30/16,6/30/16,7/20/16,12/13/16,3,166,166,,,NA,28,6,1/6/17,4,1,1,1 missing,5,1,1,1,1 missing,
20944,CC004,05x06,1,0,0,6/30/16,6/30/16,7/20/16,4/13/17,4,287,287,,,NA,121,2,NA,0,0,2,retired breeders 4/13/17,0,2,1,0,retired breeders 4/13/17,
20944,CC004,07x08,1,0,0,8/4/16,8/4/16,8/26/16,10/24/16,1,81,81,,,81,NA,6,11/18/16,5,1,0,,6,0,1,1,,
20944,CC004,07x08,1,0,0,8/4/16,8/4/16,8/26/16,11/17/16,2,105,105,,,NA,24,3,12/9/16,2,0,1,missing,2,1,1,1,missing,
20944,CC004,07x08,1,0,0,8/4/16,8/4/16,8/26/16,12/13/16,3,131,131,,,NA,26,5,1/6/17,1,2,2,missing,3,2,1,1,missing,
20944,CC004,07x08,1,0,0,8/4/16,8/4/16,8/26/16,3/1/17,4,209,209,,,NA,78,5,3/23/17,4,1,0,,5,0,1,1,,
20944,CC004,07x08,1,0,0,8/4/16,8/4/16,8/26/16,3/25/17,5,233,233,,,NA,24,2,NA,0,0,2,missing; 07 had tumor 5/1/17,0,2,1,0,missing; 07 had tumor 5/1/17,
20944,CC004,"09,10x11",0,1,0,9/28/16,9/28/16,10/20/16,12/13/16,1,76,76,,,76,NA,5,1/6/17,3,2,0,,5,0,1,1,,
20944,CC004,"09,10x11",0,1,0,9/28/16,9/28/16,10/20/16,1/30/17,2,124,124,,,NA,NA,6,2/23/17,3,1,2,2 missing,4,2,1,1,2 missing,
20944,CC004,"09,10x11",0,1,0,9/28/16,9/28/16,10/20/16,2/26/17,3,151,151,,,NA,NA,5,3/23/17,1,3,1,1 missing,4,1,1,1,1 missing,
20944,CC004,"09,10x11",0,1,0,9/28/16,9/28/16,10/20/16,4/26/17,4,210,210,,,NA,NA,5,5/18/17,2,1,2,2 missing; 09 missing 11/18/16,3,2,1,1,2 missing; 09 missing 11/18/16,
20944,CC004,102x103,1,0,0,6/30/17,6/30/17,7/20/17,NA,1,NA,NA,,,NA,NA,0,NA,0,0,,,0,0,1,0,unproductive,
20944,CC004,104x105,1,0,0,7/16/17,7/16/17,8/10/17,NA,1,NA,NA,,,NA,NA,0,NA,0,0,0,,0,0,1,0,,
20944,CC004,"106,107x108",0,1,0,7/24/17,7/24/17,8/17/17,10/25/17,1,93,93,,,93,NA,4,11/15/17,2,2,0,,4,0,1,1,,
20944,CC004,"106,107x108",0,1,0,7/24/17,7/24/17,8/17/17,10/30/17,2,98,98,,,NA,NA,2,11/18/17,0,2,0,,2,0,1,1,,
20944,CC004,"106,107x108",0,1,0,7/24/17,7/24/17,8/17/17,11/14/17,3,113,113,,,NA,NA,1,NA,0,0,1,missing,0,1,1,0,missing,
20944,CC004,"106,107x108",0,1,0,7/24/17,7/24/17,8/17/17,11/21/17,4,120,120,,,NA,NA,1,12/19/17,1,0,0,,1,0,1,1,,
20944,CC004,"106,107x108",0,1,0,7/24/17,7/24/17,8/17/17,1/19/18,5,179,179,,,NA,NA,9,2/14/18,6,3,0,,9,0,1,1,,
20944,CC004,109x110,1,0,0,7/24/17,7/24/17,8/17/17,NA,1,NA,NA,,,NA,NA,0,NA,0,0,0,109 escaped 10/17/17,0,0,1,0,109 escaped 10/17/17,
20944,CC004,"111,112x113",0,1,0,7/30/17,7/30/17,8/25/17,NA,1,NA,NA,,,NA,NA,0,NA,0,0,0,,0,0,1,0,,
20944,CC004,"114,115x116",0,1,0,7/30/17,7/30/17,8/25/17,NA,1,NA,NA,,,NA,NA,0,NA,0,0,0,,0,0,1,0,,
20944,CC004,"117,118x119",0,1,0,8/19/17,8/19/17,9/15/17,NA,1,NA,NA,,,NA,NA,0,NA,0,0,,,0,0,1,0,unproductive,
20944,CC004,"12,13x14",0,1,0,10/24/16,10/24/16,11/18/16,1/3/17,1,71,71,,,71,NA,6,1/26/17,1,4,1,0,5,1,1,1,,
20944,CC004,"12,13x14",0,1,0,10/24/16,10/24/16,11/18/16,1/18/17,2,86,86,,,NA,NA,4,2/9/17,2,2,0,0,4,0,1,1,,
20944,CC004,"12,13x14",0,1,0,10/24/16,10/24/16,11/18/16,3/9/17,3,136,136,,,NA,NA,7,3/31/17,3,4,0,0,7,0,1,1,,
20944,CC004,"12,13x14",0,1,0,10/24/16,10/24/16,11/18/16,4/2/17,4,160,160,,,NA,NA,1,NA,0,0,1,0,0,1,1,0,,
20944,CC004,"12,13x14",0,1,0,10/24/16,10/24/16,11/18/16,6/19/17,5,238,238,,,NA,NA,2,7/13/17,1,1,0,0,2,0,1,1,,
20944,CC004,"120,121x122",0,1,0,9/8/17,9/8/17,9/29/17,NA,1,NA,NA,,,NA,NA,0,NA,0,0,,,0,0,1,0,unproductive,
20944,CC004,"123,124,125x126",0,0,1,9/11/17,9/11/17,10/5/17,1/26/18,1,137,137,,,137,NA,7,2/28/18,3,1,,,4,3,1,1,"2 FD, 1 escaped",
20944,CC004,"123,124,125x126",0,0,1,9/11/17,9/11/17,10/5/17,4/1/18,2,202,202,,,NA,NA,8,5/2/18,0,5,,,5,3,1,1,2 missing,
20944,CC004,"127,128x129",0,1,0,9/21/17,9/21/17,10/20/17,NA,1,NA,NA,,,NA,NA,0,NA,0,0,,,0,0,1,0,unproductive,
20944,CC004,"130,131x132",0,1,0,9/21/17,9/21/17,10/20/17,NA,1,NA,NA,,,NA,NA,0,NA,0,0,,,0,0,1,0,unproductive,
20944,CC004,"133,134x135",0,1,0,10/25/17,10/25/17,11/30/17,1/3/18,1,70,70,,,70,NA,4,2/7/18,2,1,1,2 escaped,3,1,1,1,2 escaped,
20944,CC004,"133,134x135",0,1,0,10/25/17,10/25/17,11/30/17,1/12/18,2,79,79,,,NA,NA,1,NA,0,0,1,1 missing,0,1,1,0,1 missing,
20944,CC004,"133,134x135",0,1,0,10/25/17,10/25/17,11/30/17,3/4/18,3,130,130,,,NA,NA,3,4/17/18,0,2,1,1 escaped,2,1,1,1,1 escaped,
20944,CC004,"133,134x135",0,1,0,10/25/17,10/25/17,11/30/17,3/18/18,4,144,144,,,NA,NA,4,4/22/18,2,2,0,,4,0,1,1,,
20944,CC004,"133,134x135",0,1,0,10/25/17,10/25/17,11/30/17,4/19/18,5,176,176,,,NA,NA,2,5/3/18,0,0,2,missing,0,2,1,0,missing,
20944,CC004,"133,134x135",0,1,0,10/25/17,10/25/17,11/30/17,5/7/18,6,194,194,,,NA,NA,3,6/5/18,1,2,0,,3,0,1,1,,
20944,CC004,"133,134x135",0,1,0,10/25/17,10/25/17,11/30/17,5/26/18,7,213,213,,,NA,NA,2,6/26/18,0,1,1,2 BD; 1 missing,1,1,1,1,2 BD; 1 missing,
20944,CC004,"133,134x135",0,1,0,10/25/17,10/25/17,11/30/17,7/14/18,8,262,262,,,NA,NA,1,NA,0,0,1,missing,0,1,1,0,missing,
20944,CC004,"136,137x138",0,1,0,1/7/17,10/25/17,11/30/17,NA,1,NA,NA,,,NA,NA,0,NA,0,0,0,,0,0,1,0,,
20944,CC004,"139,140,141x142",0,0,1,11/21/17,10/30/17,12/28/17,1/20/18,1,60,82,,,60,NA,5,2/18/18,4,0,,,4,1,1,1,missing,
20944,CC004,"139,140,141x142",0,0,1,11/21/17,10/30/17,12/28/17,2/24/18,2,95,117,,,NA,NA,5,3/2/18,0,0,,,0,5,1,0,,
20944,CC004,"139,140,141x142",0,0,1,11/21/17,10/30/17,12/28/17,2/28/18,3,99,121,,,NA,NA,1,NA,0,0,,,0,1,1,0,missing,
20944,CC004,"139,140,141x142",0,0,1,11/21/17,10/30/17,12/28/17,3/24/18,4,123,145,,,NA,NA,4,NA,0,0,,,0,4,1,0,missing,
20944,CC004,"139,140,141x142",0,0,1,11/21/17,10/30/17,12/28/17,4/25/18,5,155,177,,,NA,NA,3,NA,0,0,,,0,3,1,0,,
20944,CC004,143x144,1,0,0,11/21/17,10/30/17,12/28/17,1/21/18,1,61,83,,,61,NA,1,NA,0,0,1,missing,0,1,1,0,missing,
20944,CC004,143x144,1,0,0,11/21/17,10/30/17,12/28/17,2/28/18,2,99,121,,,NA,38,4,3/20/18,4,0,0,,4,0,1,1,,
20944,CC004,143x144,1,0,0,11/21/17,10/30/17,12/28/17,3/20/18,3,119,141,,,NA,20,4,NA,0,0,4,4 missing,0,4,1,0,4 missing,
20944,CC004,143x144,1,0,0,11/21/17,10/30/17,12/28/17,4/15/18,4,145,167,,,NA,26,4,5/15/18,2,1,1,1 missing,3,1,1,1,1 missing,
20944,CC004,143x144,1,0,0,11/21/17,10/30/17,12/28/17,6/13/18,5,204,226,,,NA,59,2,7/11/18,0,1,1,"1 FD, crushed",1,1,1,1,"1 FD, crushed",
20944,CC004,"145,146x147",0,1,0,12/6/17,12/6/17,2/7/18,3/1/18,1,85,85,,,85,NA,2,NA,0,0,2,,0,2,1,0,,
20944,CC004,"145,146x147",0,1,0,12/6/17,12/6/17,2/7/18,3/4/18,2,88,88,,,NA,NA,9,4/5/18,2,7,0,,9,0,1,1,,
20944,CC004,"145,146x147",0,1,0,12/6/17,12/6/17,2/7/18,4/10/18,3,125,125,,,NA,NA,6,5/8/18,1,5,0,,6,0,1,1,,
20944,CC004,"145,146x147",0,1,0,12/6/17,12/6/17,2/7/18,4/23/18,4,138,138,,,NA,NA,7,5/22/18,3,3,1,,6,1,1,1,,
20944,CC004,"145,146x147",0,1,0,12/6/17,12/6/17,2/7/18,6/15/18,5,191,191,,,NA,NA,4,7/11/18,3,1,0,,4,0,1,1,,
20944,CC004,"145,146x147",0,1,0,12/6/17,12/6/17,2/7/18,6/21/18,6,197,197,,,NA,NA,3,7/17/18,0,3,0,,3,0,1,1,,
20944,CC004,"148,149x150",0,1,0,1/3/18,1/3/18,2/14/18,3/23/18,1,79,79,,,79,NA,3,4/17/18,1,0,,,1,2,1,1,2 FD,
20944,CC004,"15,16x17",0,1,0,10/24/16,9/28/16,12/2/16,12/25/16,1,62,88,,,62,NA,6,1/20/17,1,4,1,1 missing,5,1,1,1,1 missing,
20944,CC004,"15,16x17",0,1,0,10/24/16,9/28/16,12/2/16,3/4/17,2,131,157,,,NA,NA,5,3/31/17,1,4,0,,5,0,1,1,,
20944,CC004,"151,152x153",0,1,0,1/19/18,1/19/18,4/5/18,5/9/18,1,110,110,,,110,NA,3,6/5/18,2,1,0,,3,0,1,1,,
20944,CC004,"151,152x153",0,1,0,1/19/18,1/19/18,4/5/18,5/23/18,2,124,124,,,NA,NA,5,6/19/18,1,3,1,,4,1,1,1,,
20944,CC004,"151,152x153",0,1,0,1/19/18,1/19/18,4/5/18,7/6/18,3,168,168,,,NA,NA,3,7/31/18,1,2,0,,3,0,1,1,,
20944,CC004,"154,155x156",0,1,0,1/19/18,1/19/18,4/5/18,NA,1,NA,NA,,,NA,NA,0,NA,0,0,,,0,0,1,0,,
20944,CC004,159x160,1,0,0,3/4/18,3/4/18,5/2/18,5/31/18,1,88,88,,,88,NA,7,6/26/18,2,4,1,1 escaped,6,1,1,1,1 escaped,
20944,CC004,18x19,1,0,0,10/24/16,9/28/16,NA,NA,1,NA,NA,,,NA,NA,3,NA,2,1,0,,3,0,1,1,,
20944,CC004,"20,21x22",0,1,0,12/13/16,12/13/16,1/6/17,3/10/17,1,87,87,,,87,NA,5,3/31/17,3,2,0,,5,0,1,1,,
20944,CC004,"20,21x22",0,1,0,12/13/16,12/13/16,1/6/17,4/29/17,2,137,137,,,NA,NA,3,5/25/17,0,2,1,1 missing,2,1,1,1,1 missing,
20944,CC004,"23,24x25",0,1,0,12/13/16,12/13/16,1/6/17,NA,1,NA,NA,,,NA,NA,0,NA,0,0,,,0,0,1,0,nonproductive,
20944,CC004,"248,249x250",0,1,0,5/2/16,5/2/16,6/2/16,7/5/16,1,64,64,,,64,NA,3,7/25/16,0,3,0,,3,0,1,1,,
20944,CC004,"248,249x250",0,1,0,5/2/16,5/2/16,6/2/16,7/18/16,2,77,77,,,NA,NA,1,NA,0,0,1,missing,0,1,1,0,missing,
20944,CC004,"248,249x250",0,1,0,5/2/16,5/2/16,6/2/16,8/20/16,3,110,110,,,NA,NA,5,9/12/16,2,2,1,,4,1,1,1,,
20944,CC004,"248,249x250",0,1,0,5/2/16,5/2/16,6/2/16,10/11/16,4,162,162,,,NA,NA,2,NA,0,0,2,2 missing; 248 FD 12/22/16,0,2,1,0,2 missing; 248 FD 12/22/16,
20944,CC004,"257,258x259",0,1,0,6/4/16,6/4/16,7/5/16,8/24/16,1,81,81,,,81,NA,2,NA,0,0,2,2 FD,0,2,1,0,2 FD,
20944,CC004,"257,258x259",0,1,0,6/4/16,6/4/16,7/5/16,9/20/16,2,108,108,,,NA,NA,1,NA,0,0,1,missing,0,1,1,0,missing,
20944,CC004,"257,258x259",0,1,0,6/4/16,6/4/16,7/5/16,9/29/16,3,117,117,,,NA,NA,2,10/17/16,1,1,0,,2,0,1,1,,
20944,CC004,"257,258x259",0,1,0,6/4/16,6/4/16,7/5/16,10/19/16,4,137,137,,,NA,NA,2,NA,0,0,2,missing,0,2,1,0,missing,
20944,CC004,"257,258x259",0,1,0,6/4/16,6/4/16,7/5/16,11/23/16,5,172,172,,,NA,NA,1,NA,0,0,1,1 BD,0,1,1,0,1 BD,
20944,CC004,"257,258x259",0,1,0,6/4/16,6/4/16,7/5/16,2/2/17,6,243,243,,,NA,NA,4,2/27/17,1,1,2,1 missing; 259 pulled 3/13/17,2,2,1,1,1 missing; 259 pulled 3/13/17,
20944,CC004,"26,27x28",0,1,0,11/17/16,12/13/16,1/13/17,2/16/17,1,91,65,,,91,NA,3,3/9/17,1,2,0,,3,0,1,1,,
20944,CC004,"26,27x28",0,1,0,11/17/16,12/13/16,1/13/17,3/7/17,2,110,84,,,NA,NA,3,3/31/17,1,2,0,,3,0,1,1,,
20944,CC004,"26,27x28",0,1,0,11/17/16,12/13/16,1/13/17,3/29/17,3,132,106,,,NA,NA,3,4/20/17,2,1,0,,3,0,1,1,,
20944,CC004,"26,27x28",0,1,0,11/17/16,12/13/16,1/13/17,4/8/17,4,142,116,,,NA,NA,6,5/5/17,3,3,0,,6,0,1,1,,
20944,CC004,"26,27x28",0,1,0,11/17/16,12/13/16,1/13/17,5/3/17,5,167,141,,,NA,NA,2,5/25/17,1,1,0,,2,0,1,1,,
20944,CC004,"26,27x28",0,1,0,11/17/16,12/13/16,1/13/17,6/30/17,6,225,199,,,NA,NA,9,7/20/17,3,6,0,,9,0,1,1,,
20944,CC004,"26,27x28",0,1,0,11/17/16,12/13/16,1/13/17,7/24/17,7,249,223,,,NA,NA,6,8/17/17,3,2,1,missing,5,1,1,1,missing,
20944,CC004,"26,27x28",0,1,0,11/17/16,12/13/16,1/13/17,8/15/17,8,271,245,,,NA,NA,1,NA,0,0,1,missing,0,1,1,0,missing,
20944,CC004,"26,27x28",0,1,0,11/17/16,12/13/16,1/13/17,9/11/17,9,298,272,,,NA,NA,3,10/5/17,0,3,0,retired breeders 9/20/17,3,0,1,1,retired breeders 9/20/17,
20944,CC004,"266,267x268",0,1,0,7/12/16,7/12/16,8/8/16,10/24/16,1,104,104,,,104,NA,8,11/14/16,5,3,0,,8,0,1,1,,
20944,CC004,"266,267x268",0,1,0,7/12/16,7/12/16,8/8/16,11/14/16,2,125,125,,,NA,NA,4,12/5/16,0,3,1,missing,3,1,1,1,missing,
20944,CC004,"266,267x268",0,1,0,7/12/16,7/12/16,8/8/16,1/2/17,3,174,174,,,NA,NA,5,1/24/17,0,4,1,,4,1,1,1,,
20944,CC004,"266,267x268",0,1,0,7/12/16,7/12/16,8/8/16,1/11/17,4,183,183,,,NA,NA,3,1/30/17,2,0,1,,2,1,1,1,,
20944,CC004,"266,267x268",0,1,0,7/12/16,7/12/16,8/8/16,1/25/17,5,197,197,,,NA,NA,4,2/21/17,1,2,1,,3,1,1,1,,
20944,CC004,"266,267x268",0,1,0,7/12/16,7/12/16,8/8/16,2/17/17,6,220,220,,,NA,NA,1,3/6/17,0,1,0,,1,0,1,1,,
20944,CC004,"272,273x274",0,1,0,7/12/16,7/12/16,8/15/16,10/6/16,1,86,86,,,86,NA,6,10/31/16,2,1,3,missing,3,3,1,1,missing,
20944,CC004,"272,273x274",0,1,0,7/12/16,7/12/16,8/15/16,11/25/16,2,136,136,,,NA,NA,7,12/17/16,4,3,0,,7,0,1,1,,
20944,CC004,"272,273x274",0,1,0,7/12/16,7/12/16,8/15/16,12/17/16,3,158,158,,,NA,NA,5,1/9/17,3,2,0,,5,0,1,1,,
20944,CC004,"272,273x274",0,1,0,7/12/16,7/12/16,8/15/16,1/12/17,4,184,184,,,NA,NA,6,1/30/17,2,2,2,2 missing,4,2,1,1,2 missing,
20944,CC004,"272,273x274",0,1,0,7/12/16,7/12/16,8/15/16,2/4/17,5,207,207,,,NA,NA,4,2/27/17,2,2,0,,4,0,1,1,,
20944,CC004,"278,279x280",0,1,0,8/16/16,8/16/16,9/6/16,NA,1,NA,NA,,,NA,NA,0,NA,0,0,,,0,0,1,0,nonproductive,
20944,CC004,27x28,1,0,0,5/9/17,5/9/17,6/23/17,7/15/17,1,67,67,,,67,NA,8,8/10/17,4,3,,,7,1,1,1,1 runt ,
20944,CC004,27x28,1,0,0,5/9/17,5/9/17,6/23/17,9/2/17,2,116,116,,,NA,49,3,NA,0,0,,,0,3,1,0,,
20944,CC004,"281,282x283",0,1,0,8/22/16,8/22/16,9/12/16,NA,1,NA,NA,,,NA,NA,0,NA,0,0,,,0,0,1,0,nonproductive,
20944,CC004,"284,285x286",0,1,0,8/23/16,8/23/16,9/12/16,10/29/16,1,67,67,,,67,NA,7,11/21/16,4,2,1,,6,1,1,1,,
20944,CC004,"284,285x286",0,1,0,8/23/16,8/23/16,9/12/16,11/9/16,2,78,78,,,NA,NA,3,NA,0,0,3,3 FD,0,3,1,0,3 FD,
20944,CC004,"284,285x286",0,1,0,8/23/16,8/23/16,9/12/16,12/13/16,3,112,112,,,NA,NA,6,1/9/17,2,0,4,4 missing,2,4,1,1,4 missing,
20944,CC004,"284,285x286",0,1,0,9/6/16,9/6/16,10/3/16,11/26/16,4,81,81,,,NA,NA,6,12/19/16,3,3,0,,6,0,1,1,,
20944,CC004,"284,285x286",0,1,0,9/6/16,9/6/16,10/3/16,1/10/17,5,126,126,,,NA,NA,1,NA,0,0,1,missing,0,1,1,0,missing,
20944,CC004,"284,285x286",0,1,0,9/6/16,9/6/16,10/3/16,1/11/17,6,127,127,,,NA,NA,5,1/30/17,2,3,0,,5,0,1,1,,
20944,CC004,"284,285x286",0,1,0,9/6/16,9/6/16,10/3/16,2/18/17,7,165,165,,,NA,NA,2,3/17/17,0,2,0,,2,0,1,1,,
20944,CC004,"284,285x286",0,1,0,9/6/16,9/6/16,10/3/16,2/26/17,8,173,173,,,NA,NA,4,3/19/17,1,0,3,,1,3,1,1,,
20944,CC004,"284,285x286",0,1,0,9/6/16,9/6/16,10/3/16,3/15/17,9,190,190,,,NA,NA,2,NA,0,0,2,missing,0,2,1,0,missing,
20944,CC004,287x288x289,1,0,0,9/27/16,9/27/16,10/17/16,12/13/16,1,77,77,,,77,NA,8,1/9/17,5,3,0,,8,0,1,1,,
20944,CC004,287x288x289,1,0,0,9/27/16,9/27/16,10/17/16,2/4/17,2,130,130,,,NA,53,2,2/27/17,1,1,0,,2,0,1,1,,
20944,CC004,287x288x289,1,0,0,9/27/16,9/27/16,10/17/16,3/25/17,3,179,179,,,NA,49,2,4/17/17,1,1,0,287 runted 11/11/16,2,0,1,1,287 runted 11/11/16,
20944,CC004,"29,30x31",0,1,0,11/15/16,12/13/16,1/13/17,NA,1,NA,NA,,,NA,NA,0,NA,0,0,,,0,0,1,0,nonproductive,
20944,CC004,"290,291x292",0,1,0,10/4/16,10/4/16,10/21/16,12/16/16,1,73,73,,,73,NA,3,1/9/17,1,1,1,1 escaped,2,1,1,1,1 escaped,
20944,CC004,"290,291x292",0,1,0,10/4/16,10/4/16,10/21/16,2/23/17,2,142,142,,,NA,NA,5,3/12/17,0,2,3,2 missing,2,3,1,1,2 missing,
20944,CC004,"290,291x292",0,1,0,10/4/16,10/4/16,10/21/16,3/23/17,3,170,170,,,NA,NA,7,4/17/17,2,5,0,,7,0,1,1,,
20944,CC004,"290,291x292",0,1,0,10/4/16,10/4/16,10/21/16,5/14/17,4,222,222,,,NA,NA,4,NA,0,0,4,missing,0,4,1,0,missing,
20944,CC004,"293,294x295",0,1,0,10/13/16,10/13/16,10/31/16,12/26/16,1,74,74,,,74,NA,6,1/16/17,2,4,0,,6,0,1,1,,
20944,CC004,"293,294x295",0,1,0,10/13/16,10/13/16,10/31/16,1/13/17,2,92,92,,,NA,NA,3,1/30/17,3,0,0,,3,0,1,1,,
20944,CC004,"293,294x295",0,1,0,10/13/16,10/13/16,10/31/16,2/15/17,3,125,125,,,NA,NA,6,3/6/17,0,6,0,,6,0,1,1,,
20944,CC004,"293,294x295",0,1,0,10/13/16,10/13/16,10/31/16,3/27/17,4,165,165,4/2/17,,NA,NA,8,4/17/17,2,5,1,,7,1,2,2,,
20944,CC004,"293,294x295",0,1,0,10/13/16,10/13/16,10/31/16,4/17/17,5,186,186,,,NA,NA,6,5/15/17,4,2,0,,6,0,1,1,,
20944,CC004,"296,297x298",0,1,0,10/13/16,10/13/16,10/31/16,NA,1,NA,NA,,,NA,NA,0,NA,0,0,,,0,0,1,0,nonproductive,
20944,CC004,"299,300x301",0,1,0,10/25/16,10/25/16,11/14/16,1/10/17,1,77,77,1/14/17,,77,NA,11,1/30/17,7,4,0,,11,0,2,2,,
20944,CC004,"299,300x301",0,1,0,10/25/16,10/25/16,11/14/16,2/6/17,2,104,104,,,NA,NA,1,2/27/17,0,0,1,,0,1,1,0,,
20944,CC004,"299,300x301",0,1,0,10/25/16,10/25/16,11/14/16,2/26/17,3,124,124,3/4/17,,NA,NA,8,3/20/17,3,4,1,missing,7,1,2,2,missing,
20944,CC004,"299,300x301",0,1,0,10/25/16,10/25/16,11/14/16,4/14/17,4,171,171,,,NA,NA,7,5/1/17,3,4,0,,7,0,1,1,,
20944,CC004,"299,300x301",0,1,0,10/25/16,10/25/16,11/14/16,5/4/17,5,191,191,,,NA,NA,4,5/30/17,1,3,0,,4,0,1,1,,
20944,CC004,"302,303x304",0,1,0,10/25/16,10/25/16,11/14/16,NA,1,NA,NA,,,NA,NA,0,NA,0,0,,,0,0,1,0,nonproductive,
20944,CC004,"305,306x307",0,1,0,11/22/16,11/22/16,12/12/16,2/1/17,1,71,71,,,71,NA,6,2/21/17,4,2,0,,6,0,1,1,,
20944,CC004,"305,306x307",0,1,0,11/22/16,11/22/16,12/12/16,2/22/17,2,92,92,,,NA,NA,4,3/13/17,0,4,0,,4,0,1,1,,
20944,CC004,"305,306x307",0,1,0,11/22/16,11/22/16,12/12/16,3/16/17,3,114,114,,,NA,NA,4,4/10/17,1,3,0,,4,0,1,1,,
20944,CC004,"305,306x307",0,1,0,11/22/16,11/22/16,12/12/16,4/11/17,4,140,140,,,NA,NA,3,5/1/17,2,1,0,,3,0,1,1,,
20944,CC004,"305,306x307",0,1,0,11/22/16,11/22/16,12/12/16,5/6/17,5,165,165,,,NA,NA,7,5/30/17,3,4,0,305 escaped 12/22/16,7,0,1,1,305 escaped 12/22/16,
20944,CC004,"308,309x310",0,1,0,11/22/16,11/22/16,12/12/16,1/30/17,1,69,69,,,69,NA,7,2/21/17,6,1,0,,7,0,1,1,,
20944,CC004,"308,309x310",0,1,0,11/22/16,11/22/16,12/12/16,2/26/17,2,96,96,,,NA,NA,2,3/20/17,0,2,0,,2,0,1,1,,
20944,CC004,"308,309x310",0,1,0,11/22/16,11/22/16,12/12/16,4/16/17,3,145,145,,,NA,NA,6,5/1/17,3,2,1,,5,1,1,1,,
20944,CC004,"308,309x310",0,1,0,11/22/16,11/22/16,12/12/16,5/11/17,4,170,170,,,NA,NA,6,5/30/17,4,2,0,,6,0,1,1,,
20944,CC004,"308,309x310",0,1,0,11/22/16,11/22/16,12/12/16,6/2/17,5,192,192,,,NA,NA,5,6/26/17,3,0,2,1 BD; 1 missing; 308 toe stuck 1/26/17,3,2,1,1,1 BD; 1 missing; 308 toe stuck 1/26/17,
20944,CC004,"311,312x313",0,1,0,12/17/16,12/17/16,1/9/17,2/15/17,1,60,60,,,60,NA,5,3/6/17,0,5,0,0,5,0,1,1,,
20944,CC004,"311,312x313",0,1,0,12/17/16,12/17/16,1/9/17,2/25/17,2,70,70,,,NA,NA,5,3/13/17,2,2,NA,NA,4,1,1,1,,
20944,CC004,"311,312x313",0,1,0,12/17/16,12/17/16,1/9/17,3/9/17,3,82,82,,,NA,NA,1,3/27/17,0,1,0,0,1,0,1,1,,
20944,CC004,"311,312x313",0,1,0,12/17/16,12/17/16,1/9/17,4/7/17,4,111,111,,,NA,NA,5,5/1/17,2,3,0,0,5,0,1,1,,
20944,CC004,"311,312x313",0,1,0,12/17/16,12/17/16,1/9/17,4/23/17,5,127,127,,,NA,NA,4,5/15/17,2,2,0,0,4,0,1,1,,
20944,CC004,"311,312x313",0,1,0,12/17/16,12/17/16,1/9/17,5/17/17,6,151,151,,,NA,NA,6,6/5/17,3,2,1,0,5,1,1,1,,
20944,CC004,"311,312x313",0,1,0,12/17/16,12/17/16,1/9/17,5/23/17,7,157,157,,,NA,NA,5,6/12/17,3,2,0,0,5,0,1,1,,
20944,CC004,"311,312x313",0,1,0,12/17/16,12/17/16,1/9/17,6/9/17,8,174,174,,,NA,NA,1,6/26/17,NA,NA,NA,NA,NA,NA,1,0,,
20944,CC004,"314,315x316",0,1,0,12/13/16,12/13/16,1/9/17,2/16/17,1,65,65,,,65,NA,1,3/17/17,0,1,0,0,1,0,1,1,,
20944,CC004,"314,315x316",0,1,0,12/13/16,12/13/16,1/9/17,3/8/17,2,85,85,,,NA,NA,3,3/27/17,2,1,0,0,3,0,1,1,,
20944,CC004,"314,315x316",0,1,0,12/13/16,12/13/16,1/9/17,3/16/17,3,93,93,,,NA,NA,6,4/10/17,2,4,0,0,6,0,1,1,,
20944,CC004,"314,315x316",0,1,0,12/13/16,12/13/16,1/9/17,3/29/17,4,106,106,,,NA,NA,3,4/17/17,2,1,0,0,3,0,1,1,,
20944,CC004,"314,315x316",0,1,0,12/13/16,12/13/16,1/9/17,4/8/17,5,116,116,,,NA,NA,1,5/1/17,NA,NA,NA,NA,NA,NA,1,0,1 pup missing,
20944,CC004,"314,315x316",0,1,0,12/13/16,12/13/16,1/9/17,5/9/17,6,147,147,,,NA,NA,2,5/30/17,0,2,0,0,2,0,1,1,,
20944,CC004,"314,315x316",0,1,0,12/13/16,12/13/16,1/9/17,5/23/17,7,161,161,,,NA,NA,6,6/12/17,1,5,0,0,6,0,1,1,,
20944,CC004,"314,315x316",0,1,0,12/13/16,12/13/16,1/9/17,6/16/17,8,185,185,,,NA,NA,NA,NA,NA,NA,NA,NA,NA,NA,1,0,litter size illegible,
20944,CC004,"317,318x319",0,1,0,12/20/16,12/20/16,1/9/17,3/18/17,1,88,88,,,88,NA,2,4/10/17,1,1,0,0,2,0,1,1,,
20944,CC004,"317,318x319",0,1,0,12/20/16,12/20/16,1/9/17,3/31/17,2,101,101,,,NA,NA,3,4/17/17,1,2,0,0,3,0,1,1,,
20944,CC004,"317,318x319",0,1,0,12/20/16,12/20/16,1/9/17,4/24/17,3,125,125,,,NA,NA,2,5/15/17,0,2,0,0,2,0,1,1,,
20944,CC004,"317,318x319",0,1,0,12/20/16,12/20/16,1/9/17,6/7/17,4,169,169,,,NA,NA,7,6/26/17,2,2,NA,NA,4,3,1,1,,
20944,CC004,"317,318x319",0,1,0,12/27/16,12/27/16,1/16/17,3/3/17,5,66,66,,,NA,NA,5,3/27/17,3,2,NA,NA,5,0,1,1,,
20944,CC004,"317,318x319",0,1,0,12/27/16,12/27/16,1/16/17,3/25/17,6,88,88,,,NA,NA,10,4/17/17,6,4,0,0,10,0,1,1,,
20944,CC004,"317,318x319",0,1,0,12/27/16,12/27/16,1/16/17,4/18/17,7,112,112,,,NA,NA,2,5/15/17,NA,NA,NA,NA,NA,NA,1,0,missing pups,
20944,CC004,"317,318x319",0,1,0,12/27/16,12/27/16,1/16/17,5/5/17,8,129,129,5/14/17,,NA,NA,6,5/30/17,1,4,NA,NA,5,1,2,2,,
20944,CC004,"317,318x319",0,1,0,12/27/16,12/27/16,1/16/17,5/27/17,9,151,151,6/4/17,,NA,NA,6,6/18/17,2,3,1,0,5,1,2,2,,
20944,CC004,"317,318x319",0,1,0,12/27/16,12/27/16,1/16/17,6/26/17,10,181,181,,,NA,NA,2,7/17/17,0,2,0,0,2,0,1,1,,
20944,CC004,"32,33,34x35",0,0,1,11/15/16,12/13/16,1/13/17,2/15/17,1,92,64,2/17/17,,92,NA,10,3/9/17,2,6,2,,8,2,2,2,,
20944,CC004,"32,33,34x35",0,0,1,11/15/16,12/13/16,1/13/17,2/20/17,2,97,69,,,NA,NA,4,NA,0,0,4,missing,0,4,1,0,missing,
20944,CC004,"32,33,34x35",0,0,1,11/15/16,12/13/16,1/13/17,3/28/17,3,133,105,,,NA,NA,2,4/20/17,1,1,0,,2,0,1,1,,
20944,CC004,"32,33,34x35",0,0,1,11/15/16,12/13/16,1/13/17,4/7/17,4,143,115,,,NA,NA,7,4/27/17,3,4,0,,7,0,1,1,,
20944,CC004,"32,33,34x35",0,0,1,11/15/16,12/13/16,1/13/17,4/10/17,5,146,118,,,NA,NA,6,5/5/17,3,2,1,,5,1,1,1,,
20944,CC004,"32,33,34x35",0,0,1,11/15/16,12/13/16,1/13/17,5/4/17,6,170,142,,,NA,NA,2,NA,0,0,2,2 missing,0,2,1,0,2 missing,
20944,CC004,"32,33,34x35",0,0,1,11/15/16,12/13/16,1/13/17,5/12/17,7,178,150,,,NA,NA,2,6/2/17,1,1,0,,2,0,1,1,,
20944,CC004,"32,33,34x35",0,0,1,11/15/16,12/13/16,1/13/17,5/29/17,8,195,167,,,NA,NA,5,6/23/17,2,2,1,1 missing; retired breeders 9/20/17; one female with tumor 8/28/17,4,1,1,1,1 missing; retired breeders 9/20/17; one female with tumor 8/28/17,
20944,CC004,"320,321x322",0,1,0,1/10/17,1/10/17,1/30/17,3/27/17,1,76,76,3/29/17,,76,NA,10,4/17/17,2,7,,,9,1,2,2,,
20944,CC004,"320,321x322",0,1,0,1/10/17,1/10/17,1/30/17,5/14/17,2,124,124,5/19/17,,NA,NA,13,6/5/17,8,4,,,12,1,2,2,1 missing pup,
20944,CC004,"320,321x322",0,1,0,1/10/17,1/10/17,1/30/17,6/10/17,3,151,151,,,NA,NA,5,7/7/17,2,3,,,5,0,1,1,,
20944,CC004,"320,321x322",0,1,0,1/10/17,1/10/17,1/30/17,6/29/17,4,170,170,7/3/17,,NA,NA,6,7/17/17,3,2,,,5,1,2,2,missing pup,
20944,CC004,"320,321x322",0,1,0,1/10/17,1/10/17,1/30/17,8/12/17,5,214,214,,,NA,NA,2,9/5/17,1,1,,,2,0,1,1,,
20944,CC004,"323,324x325",0,1,0,1/10/17,1/10/17,1/30/17,4/8/17,1,88,88,,,88,NA,7,5/2/17,4,3,,,7,0,1,1,male pulled 9/5/17,
20944,CC004,"323,324x325",0,1,0,1/10/17,1/10/17,1/30/17,5/25/17,2,135,135,,,NA,NA,5,6/12/17,2,2,,,4,1,1,1,male pulled 9/5/17,
20944,CC004,"323,324x325",0,1,0,1/10/17,1/10/17,1/30/17,7/6/17,3,177,177,,,NA,NA,5,7/28/17,3,2,,,5,0,1,1,male pulled 9/5/17,
20944,CC004,"323,324x325",0,1,0,1/10/17,1/10/17,1/30/17,7/16/17,4,187,187,,,NA,NA,6,8/7/17,3,3,,,6,0,1,1,male pulled 9/5/17,
20944,CC004,"326,327x328",0,1,0,1/10/17,1/10/17,1/30/17,3/19/17,1,68,68,,,68,NA,4,4/10/17,3,1,,,4,0,1,1,male pulled 9/5/17,
20944,CC004,"326,327x328",0,1,0,1/10/17,1/10/17,1/30/17,5/6/17,2,116,116,,,NA,NA,8,5/20/17,3,5,,,8,0,1,1,male pulled 9/5/17,
20944,CC004,"326,327x328",0,1,0,1/10/17,1/10/17,1/30/17,5/27/17,3,137,137,,,NA,NA,2,6/12/17,1,1,,,2,0,1,1,male pulled 9/5/17,
20944,CC004,"326,327x328",0,1,0,1/10/17,1/10/17,1/30/17,6/16/17,4,157,157,,,NA,NA,3,NA,0,0,,,0,3,1,0,2 born dead; 1 missing; male pulled 9/5/17,
20944,CC004,"326,327x328",0,1,0,1/10/17,1/10/17,1/30/17,6/27/17,5,168,168,,,NA,NA,3,7/17/17,1,2,,,3,0,1,1,male pulled 9/5/17,
20944,CC004,"326,327x328",0,1,0,1/10/17,1/10/17,1/30/17,7/12/17,6,183,183,,,NA,NA,6,7/28/17,1,4,,,5,1,1,1,1 missing; male pulled 9/5/17,
20944,CC004,"326,327x328",0,1,0,1/10/17,1/10/17,1/30/17,8/4/17,7,206,206,,,NA,NA,5,8/21/17,1,3,,,4,1,1,1,1 born dead; male pulled 9/5/17,
20944,CC004,"326,327x328",0,1,0,1/10/17,1/10/17,1/30/17,8/27/17,8,229,229,,,NA,NA,3,9/18/17,3,0,,,3,0,1,1,male pulled 9/5/17,
20944,CC004,"329,330x331",0,1,0,1/10/17,1/10/17,1/30/17,3/16/17,1,65,65,,,65,NA,3,4/10/17,2,1,,,3,0,1,1,,
20944,CC004,"329,330x331",0,1,0,1/10/17,1/10/17,1/30/17,4/1/17,2,81,81,,,NA,NA,4,4/28/17,1,3,,,4,0,1,1,,
20944,CC004,"329,330x331",0,1,0,1/10/17,1/10/17,1/30/17,5/11/17,3,121,121,,,NA,NA,2,NA,0,0,,,0,2,1,0,2 missing,
20944,CC004,"329,330x331",0,1,0,1/10/17,1/10/17,1/30/17,5/23/17,4,133,133,,,NA,NA,3,6/12/17,2,1,,,3,0,1,1,,
20944,CC004,"329,330x331",0,1,0,1/10/17,1/10/17,1/30/17,6/5/17,5,146,146,,,NA,NA,5,6/26/17,2,3,,,5,0,1,1,,
20944,CC004,"329,330x331",0,1,0,1/10/17,1/10/17,1/30/17,8/16/17,6,218,218,,,NA,NA,2,9/5/17,0,0,,,0,2,1,0,missing ,
20944,CC004,332x333,1,0,0,2/2/17,2/2/17,2/27/17,4/8/17,1,65,65,,,65,NA,6,5/1/17,3,2,,,5,1,1,1,male pulled 9/5/17,
20944,CC004,332x333,1,0,0,2/2/17,2/2/17,2/27/17,5/30/17,2,117,117,,,NA,52,6,6/19/17,3,3,,,6,0,1,1,male pulled 9/5/17,
20944,CC004,332x333,1,0,0,2/2/17,2/2/17,2/27/17,7/17/17,3,165,165,,,NA,48,5,8/7/17,2,3,,,5,0,1,1,male pulled 9/5/17,
20944,CC004,332x333,1,0,0,2/2/17,2/2/17,2/27/17,9/9/17,4,219,219,,,NA,54,3,NA,NA,NA,,,NA,NA,1,0,male pulled 9/5/17,
20944,CC004,"334,335x336",0,1,0,2/4/17,2/4/17,2/27/17,4/22/17,1,77,77,,,77,NA,3,5/15/17,1,2,,,3,0,1,1,,
20944,CC004,"334,335x336",0,1,0,2/4/17,2/4/17,2/27/17,5/10/17,2,95,95,,,NA,NA,5,5/30/17,0,3,,,3,2,1,1,,
20944,CC004,"337,338x339",0,1,0,2/25/17,2/25/17,3/13/17,5/20/17,1,84,84,,,84,NA,2,NA,0,0,2,339 FD 5/26/17,0,2,1,0,339 FD 5/26/17,
20944,CC004,"340,341x342",0,1,0,3/14/17,3/14/17,4/10/17,5/20/17,1,67,67,,,67,NA,1,6/12/17,0,1,,,1,0,1,1,,
20944,CC004,"340,341x342",0,1,0,3/14/17,3/14/17,4/10/17,5/28/17,2,75,75,,,NA,NA,3,6/19/17,1,2,,,3,0,1,1,,
20944,CC004,"340,341x342",0,1,0,3/14/17,3/14/17,4/10/17,8/28/17,3,167,167,,,NA,NA,5,9/18/17,2,3,,,5,0,1,1,,
20944,CC004,"343,344x345",0,1,0,3/25/17,3/25/17,4/17/17,6/1/17,1,68,68,,,68,NA,6,6/19/17,2,4,,,6,0,1,1,,
20944,CC004,"346,347x348",0,1,0,3/25/17,3/25/17,4/17/17,6/7/17,1,74,74,,,74,NA,5,6/26/17,3,2,,,5,0,1,1,,
20944,CC004,"346,347x348",0,1,0,3/25/17,3/25/17,4/17/17,6/28/17,2,95,95,,,NA,NA,5,7/17/17,2,3,,,5,0,1,1,,
20944,CC004,"346,347x348",0,1,0,3/25/17,3/25/17,4/17/17,7/20/17,3,117,117,,,NA,NA,4,8/7/17,2,2,,,4,0,1,1,,
20944,CC004,"346,347x348",0,1,0,3/25/17,3/25/17,4/17/17,8/11/17,4,139,139,,,NA,NA,5,8/28/17,4,1,,,5,0,1,1,,
20944,CC004,"346,347x348",0,1,0,3/25/17,3/25/17,4/17/17,9/30/17,5,189,189,,,NA,NA,3,10/23/17,1,2,,,3,0,1,1,,
20944,CC004,"349,350x351",0,1,0,4/8/17,4/8/17,5/1/17,6/19/17,1,72,72,6/28/17,,72,NA,7,7/12/17,1,6,,,7,0,2,2,,
20944,CC004,"349,350x351",0,1,0,4/8/17,4/8/17,5/1/17,7/18/17,2,101,101,,,NA,NA,3,8/7/17,2,1,,,3,0,1,1,,
20944,CC004,"349,350x351",0,1,0,4/8/17,4/8/17,5/1/17,8/10/17,3,124,124,,,NA,NA,4,8/28/17,2,1,,,3,1,1,1,1 FD,
20944,CC004,"352,353x354",0,1,0,4/7/17,4/7/17,5/1/17,6/27/17,1,81,81,,,81,NA,7,7/17/17,5,1,,,6,1,1,1,missing,
20944,CC004,"352,353x354",0,1,0,4/7/17,4/7/17,5/1/17,6/30/17,2,84,84,,,NA,NA,7,7/28/17,3,4,,,7,0,1,1,,
20944,CC004,"352,353x354",0,1,0,4/7/17,4/7/17,5/1/17,7/31/17,3,115,115,,,NA,NA,3,8/21/17,1,2,,,3,0,1,1,,
20944,CC004,"352,353x354",0,1,0,4/7/17,4/7/17,5/1/17,9/7/17,4,153,153,,,NA,NA,7,9/25/17,3,3,,,6,1,1,1,missing,
20944,CC004,"352,353x354",0,1,0,4/7/17,4/7/17,5/1/17,10/1/17,5,177,177,,,NA,NA,5,10/27/17,2,3,,,5,0,1,1,,
20944,CC004,"352,353x354",0,1,0,4/7/17,4/7/17,5/1/17,11/22/17,6,229,229,,,NA,NA,3,NA,0,0,,,0,3,1,0,354 12/4/17 raw,
20944,CC004,"355,356x357",0,1,0,4/17/17,4/17/17,5/15/17,NA,1,NA,NA,,,NA,NA,0,NA,0,0,,,0,0,1,0,non productive,
20944,CC004,"358,359x360",0,1,0,4/17/17,4/17/17,5/15/17,NA,1,NA,NA,,,NA,NA,0,NA,0,0,,,0,0,1,0,non productive,
20944,CC004,"36,37x38",0,1,0,12/28/16,12/28/16,1/20/17,NA,1,NA,NA,,,NA,NA,0,NA,0,0,,,0,0,1,0,nonproductive,
20944,CC004,"361,362x363",0,1,0,5/17/17,5/17/17,6/5/17,8/2/17,1,77,77,,,77,NA,2,8/28/17,1,1,,,2,0,1,1,,
20944,CC004,"361,362x363",0,1,0,5/17/17,5/17/17,6/5/17,8/16/17,2,91,91,,,NA,NA,6,9/5/17,4,2,,,6,0,1,1,,
20944,CC004,"361,362x363",0,1,0,5/17/17,5/17/17,6/5/17,10/3/17,3,139,139,,,NA,NA,4,10/23/17,2,2,,,4,0,1,1,,
20944,CC004,"361,362x363",0,1,0,5/17/17,5/17/17,6/5/17,10/17/17,4,153,153,,,NA,NA,3,11/6/17,2,1,,,3,0,1,1,,
20944,CC004,"361,362x363",0,1,0,5/17/17,5/17/17,6/5/17,11/8/17,5,175,175,,,NA,NA,3,11/27/17,1,1,,,2,1,1,1,,
20944,CC004,"364,365x366",0,1,0,5/16/17,5/16/17,6/5/17,7/20/17,1,65,65,,,65,NA,6,8/7/17,3,3,,,6,0,1,1,,
20944,CC004,"364,365x366",0,1,0,5/16/17,5/16/17,6/5/17,7/26/17,2,71,71,,,NA,NA,4,8/14/17,2,1,,,3,1,1,1,missing,
20944,CC004,"364,365x366",0,1,0,5/16/17,5/16/17,6/5/17,8/8/17,3,84,84,,,NA,NA,4,8/28/17,1,3,,,4,0,1,1,,
20944,CC004,"364,365x366",0,1,0,5/16/17,5/16/17,6/5/17,8/30/17,4,106,106,,,NA,NA,6,9/25/17,4,1,,,5,1,1,1,,
20944,CC004,"364,365x366",0,1,0,5/16/17,5/16/17,6/5/17,9/20/17,5,127,127,,,NA,NA,4,10/9/17,0,1,,,1,3,1,1,1 BD; 1 missing,
20944,CC004,"364,365x366",0,1,0,5/16/17,5/16/17,6/5/17,10/13/17,6,150,150,,,NA,NA,3,11/6/17,1,1,,,2,1,1,1,missing,
20944,CC004,"364,365x366",0,1,0,5/16/17,5/16/17,6/5/17,11/2/17,7,170,170,,,NA,NA,5,11/27/17,1,0,,,1,4,1,1,missing,
20944,CC004,"364,365x366",0,1,0,5/16/17,5/16/17,6/5/17,12/1/17,8,199,199,,,NA,NA,1,12/18/17,1,0,,,1,0,1,1,,
20944,CC004,"367,368x369",0,1,0,5/23/17,5/23/17,6/12/17,8/30/17,1,99,99,,,99,NA,4,9/25/17,2,2,,,4,0,1,1,,
20944,CC004,"367,368x369",0,1,0,5/23/17,5/23/17,6/12/17,9/12/17,2,112,112,,,NA,NA,4,10/2/17,3,1,,,4,0,1,1,,
20944,CC004,"367,368x369",0,1,0,5/23/17,5/23/17,6/12/17,9/19/17,3,119,119,,,NA,NA,1,10/9/17,1,0,,,1,0,1,1,,
20944,CC004,"367,368x369",0,1,0,5/23/17,5/23/17,6/12/17,10/5/17,4,135,135,,,NA,NA,3,10/23/17,0,2,,,2,1,1,1,1 missing,
20944,CC004,"367,368x369",0,1,0,5/23/17,5/23/17,6/12/17,10/14/17,5,144,144,,,NA,NA,6,11/6/17,3,3,,,6,0,1,1,,
20944,CC004,"367,368x369",0,1,0,5/23/17,5/23/17,6/12/17,10/26/17,6,156,156,,,NA,NA,1,NA,0,0,,,0,1,1,0,1 missing,
20944,CC004,"370,371x372",0,1,0,5/23/17,5/23/17,6/12/17,8/8/17,1,77,77,,,77,NA,10,8/28/17,3,6,,,9,1,1,1,,
20944,CC004,"370,371x372",0,1,0,5/23/17,5/23/17,6/12/17,9/20/17,2,120,120,,,NA,NA,4,10/8/17,0,3,,,3,1,1,1,1 BD,
20944,CC004,"370,371x372",0,1,0,5/23/17,5/23/17,6/12/17,10/12/17,3,142,142,,,NA,NA,8,11/6/17,3,5,,,8,0,1,1,,
20944,CC004,"370,371x372",0,1,0,5/23/17,5/23/17,6/12/17,10/23/17,4,153,153,,,NA,NA,1,11/13/17,0,0,,,0,1,1,0,FD,
20944,CC004,"373,374x375",0,1,0,6/6/17,6/6/17,6/26/17,8/24/17,1,79,79,,,79,NA,5,NA,0,0,,,0,5,1,0,missing,
20944,CC004,"373,374x375",0,1,0,6/6/17,6/6/17,6/26/17,8/28/17,2,83,83,,,NA,NA,7,9/18/17,3,4,,,7,0,1,1,,
20944,CC004,"373,374x375",0,1,0,6/6/17,6/6/17,6/26/17,9/19/17,3,105,105,,,NA,NA,3,NA,0,0,,,0,3,1,0,missing,
20944,CC004,"373,374x375",0,1,0,6/6/17,6/6/17,6/26/17,10/16/17,4,132,132,,,NA,NA,1,NA,0,0,,,0,1,1,0,missing,
20944,CC004,"373,374x375",0,1,0,6/6/17,6/6/17,6/26/17,10/19/17,5,135,135,,,NA,NA,7,11/13/17,0,4,,,4,3,1,1,1 FD; 373 with tumor 11/2/17,
20944,CC004,"376,377x378",0,1,0,6/10/17,6/10/17,7/3/17,8/26/17,1,77,77,,,77,NA,5,9/18/17,3,2,,,5,0,1,1,,
20944,CC004,"376,377x378",0,1,0,6/10/17,6/10/17,7/3/17,10/13/17,2,125,125,,,NA,NA,6,NA,0,0,,,0,6,1,0,1 BD; missing,
20944,CC004,"376,377x378",0,1,0,6/10/17,6/10/17,7/3/17,11/14/17,3,157,157,,,NA,NA,4,12/4/17,1,3,,,4,0,1,1,,
20944,CC004,"379,380x381",0,1,0,6/6/17,6/6/17,7/3/17,NA,1,NA,NA,,,NA,NA,0,NA,0,0,,,0,0,1,0,nonproductive,
20944,CC004,"382,383x384",0,1,0,7/4/17,7/4/17,7/28/17,9/14/17,1,72,72,,,72,NA,7,10/2/17,2,5,,,7,0,1,1,,
20944,CC004,"382,383x384",0,1,0,7/4/17,7/4/17,7/28/17,9/27/17,2,85,85,,,NA,NA,4,10/16/17,3,1,,,4,0,1,1,,
20944,CC004,"382,383x384",0,1,0,7/4/17,7/4/17,7/28/17,10/25/17,3,113,113,,,NA,NA,3,11/27/17,0,2,,,2,1,1,1,,
20944,CC004,"382,383x384",0,1,0,7/4/17,7/4/17,7/28/17,11/22/17,4,141,141,,,NA,NA,1,1/4/18,0,0,,,0,1,1,0,missing,
20944,CC004,"382,383x384",0,1,0,7/4/17,7/4/17,7/28/17,12/13/17,5,162,162,12/16/17,,NA,NA,14,1/3/18,5,7,,,12,2,2,2,,
20944,CC004,"382,383x384",0,1,0,7/4/17,7/4/17,7/28/17,1/8/18,6,188,188,,,NA,NA,5,1/29/18,2,3,,,5,0,1,1,,
20944,CC004,"385,386x387",0,1,0,7/4/17,7/4/17,7/28/17,9/14/17,1,72,72,,,72,NA,6,10/2/17,3,0,,,3,3,1,1,"1 BD, 2 missing",
20944,CC004,"385,386x387",0,1,0,7/4/17,7/4/17,7/28/17,9/25/17,2,83,83,,,NA,NA,4,10/16/17,1,2,,,3,1,1,1,1 missing,
20944,CC004,"385,386x387",0,1,0,7/4/17,7/4/17,7/28/17,11/7/17,3,126,126,,,NA,NA,5,11/27/17,1,4,,,5,0,1,1,,
20944,CC004,"385,386x387",0,1,0,7/4/17,7/4/17,7/28/17,11/16/17,4,135,135,,,NA,NA,5,12/4/17,4,1,,,5,0,1,1,,
20944,CC004,"385,386x387",0,1,0,7/4/17,7/4/17,7/28/17,11/29/17,5,148,148,,,NA,NA,3,12/18/17,2,1,,,3,0,1,1,,
20944,CC004,"385,386x387",0,1,0,7/4/17,7/4/17,7/28/17,12/10/17,6,159,159,,,NA,NA,3,1/7/18,1,2,,,3,0,1,1,,
20944,CC004,"385,386x387",0,1,0,7/4/17,7/4/17,7/28/17,12/12/17,7,161,161,,,NA,NA,2,NA,0,0,,,0,2,1,0,missing,
20944,CC004,"385,386x387",0,1,0,7/4/17,7/4/17,7/28/17,1/6/18,8,186,186,,,NA,NA,4,1/29/18,3,1,,,4,0,1,1,,
20944,CC004,"385,386x387",0,1,0,7/4/17,7/4/17,7/28/17,1/25/18,9,205,205,,,NA,NA,3,NA,0,0,,,0,3,1,0,missing,
20944,CC004,"388,389x390",0,1,0,7/14/17,7/14/17,7/31/17,9/27/17,1,75,75,,,75,NA,9,10/16/17,4,5,0,0,9,0,1,1,,
20944,CC004,"388,389x390",0,1,0,7/14/17,7/14/17,7/31/17,11/12/17,2,121,121,,,NA,NA,1,12/1/17,NA,NA,NA,NA,NA,NA,1,0,pup missing,
20944,CC004,"388,389x390",0,1,0,7/14/17,7/14/17,7/31/17,11/15/17,3,124,124,,,NA,NA,6,12/4/17,5,1,0,0,6,0,1,1,,
20944,CC004,"388,389x390",0,1,0,7/14/17,7/14/17,7/31/17,12/29/17,4,168,168,,,NA,NA,4,1/15/18,2,2,0,0,4,0,1,1,,
20944,CC004,"388,389x390",0,1,0,7/14/17,7/14/17,7/31/17,1/2/18,5,172,172,,,NA,NA,3,1/22/18,1,1,NA,NA,2,1,1,1,pup missing,
20944,CC004,"391,392x393",0,1,0,7/26/17,7/26/17,8/14/17,10/2/17,1,68,68,10/6/17,,68,NA,7,10/23/17,4,3,0,0,7,0,2,2,,
20944,CC004,"391,392x393",0,1,0,7/26/17,7/26/17,8/14/17,11/17/17,2,114,114,,,NA,NA,1,NA,NA,NA,NA,NA,NA,NA,1,0,pup missing,
20944,CC004,"391,392x393",0,1,0,7/26/17,7/26/17,8/14/17,11/19/17,3,116,116,,,NA,NA,4,12/4/17,2,2,0,0,4,0,1,1,,
20944,CC004,"391,392x393",0,1,0,7/26/17,7/26/17,8/14/17,12/7/17,4,134,134,12/9/17,,NA,NA,7,12/26/17,4,3,0,0,7,0,2,2,,
20944,CC004,"394,395x396",0,1,0,8/10/17,8/10/17,9/5/17,11/6/17,1,88,88,,,88,NA,4,11/27/17,4,0,,,4,0,1,1,,
20944,CC004,"394,395x396",0,1,0,8/10/17,8/10/17,9/5/17,11/27/17,2,109,109,,,NA,NA,6,12/18/17,0,3,,,3,3,1,1,,
20944,CC004,"394,395x396",0,1,0,8/10/17,8/10/17,9/5/17,1/3/18,3,146,146,,,NA,NA,2,1/22/18,2,0,,,2,0,1,1,,
20944,CC004,"394,395x396",0,1,0,8/10/17,8/10/17,9/5/17,1/24/18,4,167,167,,,NA,NA,3,2/19/18,3,0,,,3,0,1,1,,
20944,CC004,"394,395x396",0,1,0,8/10/17,8/10/17,9/5/17,2/16/18,5,190,190,,,NA,NA,2,3/5/18,0,0,,,0,2,1,0,missing,
20944,CC004,"394,395x396",0,1,0,8/16/17,8/16/17,9/5/17,3/19/18,6,215,215,,,NA,NA,2,NA,NA,NA,,,NA,0,1,0,,
20944,CC004,"397,398x399",0,1,0,8/16/17,8/16/17,9/5/17,10/19/17,1,64,64,,,64,NA,6,11/6/17,5,1,,,6,0,1,1,,
20944,CC004,"397,398x399",0,1,0,8/16/17,8/16/17,9/5/17,11/10/17,2,86,86,,,NA,NA,3,11/27/17,1,2,,,3,0,1,1,,
20944,CC004,"397,398x399",0,1,0,8/16/17,8/16/17,9/5/17,12/1/17,3,107,107,,,NA,NA,4,12/18/17,1,3,,,4,0,1,1,,
20944,CC004,"397,398x399",0,1,0,8/16/17,8/16/17,9/5/17,12/21/17,4,127,127,,,NA,NA,7,1/8/18,4,3,,,7,0,1,1,,
20944,CC004,"397,398x399",0,1,0,8/16/17,8/16/17,9/5/17,1/10/18,5,147,147,,,NA,NA,7,1/29/18,4,3,,,7,0,1,1,,
20944,CC004,"397,398x399",0,1,0,8/16/17,8/16/17,9/5/17,2/23/18,6,191,191,,,NA,NA,2,3/19/18,1,1,,,2,0,1,1,,
20944,CC004,"397,398x399",0,1,0,8/16/17,8/16/17,9/5/17,3/13/18,7,209,209,,,NA,NA,2,NA,NA,NA,,,NA,0,1,0,,
20944,CC004,39x40,1,0,0,12/25/16,12/25/16,1/20/17,4/8/17,1,104,104,,,104,NA,3,5/5/17,1,1,1,1 missing,2,1,1,1,1 missing,
20944,CC004,"400,401x402",0,1,0,9/14/17,9/14/17,10/2/17,12/2/17,1,79,79,,,79,NA,14,12/26/17,7,5,2,,12,2,1,1,,
20944,CC004,"400,401x402",0,1,0,9/14/17,9/14/17,10/2/17,2/2/18,2,141,141,,,NA,NA,8,2/26/18,3,5,0,,8,0,1,1,,
20944,CC004,"403,404x405",0,1,0,9/12/17,9/12/17,10/2/17,12/13/17,1,92,92,,,92,NA,4,1/3/18,0,3,,,3,1,1,1,missing,
20944,CC004,"403,404x405",0,1,0,9/12/17,9/12/17,10/2/17,1/2/18,2,112,112,,,NA,NA,5,1/22/18,4,1,,,5,0,1,1,,
20944,CC004,"403,404x405",0,1,0,9/12/17,9/12/17,10/2/17,2/21/18,3,162,162,,,NA,NA,4,3/12/18,1,1,,,2,2,1,1,1 female AH,
20944,CC004,"403,404x405",0,1,0,9/12/17,9/12/17,10/2/17,4/11/18,4,211,211,,,NA,NA,4,4/30/18,0,2,,,2,2,1,1,,
20944,CC004,"406,407x408",0,1,0,10/17/17,10/17/17,11/6/17,2/8/18,1,114,114,,,114,NA,6,2/26/18,4,0,,,4,2,1,1,missing,
20944,CC004,"406,407x408",0,1,0,10/17/17,10/17/17,11/6/17,3/23/18,2,157,157,,,NA,NA,5,4/9/18,0,0,,,0,5,1,0,missing,
20944,CC004,"406,407x408",0,1,0,10/17/17,10/17/17,11/6/17,4/19/18,3,184,184,,,NA,NA,3,5/14/18,0,0,,,0,3,1,0,missing,
20944,CC004,409x410,1,0,0,10/13/17,10/13/17,11/6/17,NA,1,NA,NA,,,NA,NA,0,NA,0,0,,,0,0,1,0,nonproductive,
20944,CC004,"411,412x413",0,1,0,10/12/17,10/12/17,11/6/17,12/23/17,1,72,72,12/28/17,,72,NA,7,1/15/18,4,3,,,7,0,2,2,,
20944,CC004,"411,412x413",0,1,0,10/12/17,10/12/17,11/6/17,2/14/18,2,125,125,,,NA,NA,5,3/5/18,0,3,,,3,2,1,1,,
20944,CC004,"411,412x413",0,1,0,10/12/17,10/12/17,11/6/17,2/24/18,3,135,135,,,NA,NA,5,3/19/18,3,2,,,5,0,1,1,,
20944,CC004,"411,412x413",0,1,0,10/12/17,10/12/17,11/6/17,3/7/18,4,146,146,,,NA,NA,2,3/26/18,0,2,,,2,0,1,1,,
20944,CC004,"414,415x416",0,1,0,10/14/17,10/14/17,11/6/17,2/28/18,1,137,137,,,137,NA,3,3/19/18,1,1,,,2,1,1,1,,
20944,CC004,"414,415x416",0,1,0,10/14/17,10/14/17,11/6/17,4/13/18,2,181,181,,,NA,NA,4,5/1/18,3,0,,,3,1,1,1,,
20944,CC004,"417,418x419",0,1,0,11/16/17,11/16/17,12/4/17,2/26/18,1,102,102,,,102,NA,1,NA,0,0,1,missing,0,1,1,0,missing,
20944,CC004,"417,418x419",0,1,0,11/16/17,11/16/17,12/4/17,3/24/18,2,128,128,,,NA,NA,2,4/16/18,0,2,0,,2,0,1,1,,
20944,CC004,41x42,1,0,0,1/3/17,1/3/17,1/26/17,4/1/17,1,88,88,,,88,NA,3,4/27/17,1,1,1,1 missing,2,1,1,1,1 missing,
20944,CC004,41x42,1,0,0,1/3/17,1/3/17,1/26/17,4/23/17,2,110,110,,,NA,22,6,5/18/17,3,1,2,1 FD; 1 missing,4,2,1,1,1 FD; 1 missing,
20944,CC004,41x42,1,0,0,1/3/17,1/3/17,1/26/17,6/4/17,3,152,152,,,NA,42,4,6/29/17,1,3,0,retired breeders 9/20/17,4,0,1,1,retired breeders 9/20/17,
20944,CC004,"420,421x422",0,1,0,11/15/17,11/15/17,12/4/17,1/21/18,1,67,67,,,67,NA,5,2/19/18,2,3,0,,5,0,1,1,,
20944,CC004,"420,421x422",0,1,0,11/15/17,11/15/17,12/4/17,3/2/18,2,107,107,,,NA,NA,2,3/26/18,0,2,0,,2,0,1,1,,
20944,CC004,"420,421x422",0,1,0,11/15/17,11/15/17,12/4/17,5/17/18,3,183,183,,,NA,NA,6,NA,0,0,6,2 BD; 4 missing,0,6,1,0,2 BD; 4 missing,
20944,CC004,"420,421x422",0,1,0,11/15/17,11/15/17,12/4/17,6/15/18,4,212,212,,,NA,NA,6,NA,0,0,6,2 FD; 4 missing,0,6,1,0,2 FD; 4 missing,
20944,CC004,"423,424x425",0,1,0,12/12/17,12/12/17,1/3/18,NA,1,NA,NA,,,NA,NA,0,NA,0,0,0,nonproductive 4/27/18,0,0,1,0,nonproductive 4/27/18,
20944,CC004,"426,427x428",0,1,0,12/12/17,12/12/17,1/3/18,3/22/18,1,100,100,,,100,NA,3,NA,0,0,3,missing,0,3,1,0,missing,
20944,CC004,"426,427x428",0,1,0,12/12/17,12/12/17,1/3/18,4/14/18,2,123,123,,,NA,NA,4,5/14/18,2,1,1,,3,1,1,1,,
20944,CC004,"426,427x428",0,1,0,12/12/17,12/12/17,1/3/18,5/14/18,3,153,153,,,NA,NA,5,6/4/18,1,2,2,2 female AH,3,2,1,1,2 female AH,
20944,CC004,"426,427x428",0,1,0,12/12/17,12/12/17,1/3/18,6/4/18,4,174,174,,,NA,NA,5,NA,0,0,5,5 missing,0,5,1,0,5 missing,
20944,CC004,"429,430x41",0,1,0,12/21/17,12/21/17,1/8/18,NA,1,NA,NA,,,NA,NA,0,NA,0,0,0,nonproductive 4/27/18,0,0,1,0,nonproductive 4/27/18,
20944,CC004,"432,433x434",0,1,0,12/21/17,12/21/17,1/8/18,NA,1,NA,NA,,,NA,NA,0,NA,0,0,0,nonproductive 4/27/18,0,0,1,0,nonproductive 4/27/18,
20944,CC004,"435,436x437",0,1,0,12/5/17,12/5/17,2/5/18,2/27/18,1,84,84,,,84,NA,8,4/6/18,6,2,0,,8,0,1,1,,
20944,CC004,"435,436x437",0,1,0,12/5/17,12/5/17,2/5/18,4/27/18,2,143,143,,,NA,NA,6,5/14/18,5,1,0,,6,0,1,1,,
20944,CC004,"435,436x437",0,1,0,12/5/17,12/5/17,2/5/18,5/20/18,3,166,166,,,NA,NA,4,6/11/18,1,2,1,1 FD,3,1,1,1,1 FD,
20944,CC004,"435,436x437",0,1,0,12/5/17,12/5/17,2/5/18,6/8/18,4,185,185,,,NA,NA,5,7/2/18,3,1,1,1 missing,4,1,1,1,1 missing,
20944,CC004,"438,439x440",0,1,0,12/5/17,12/5/17,2/5/18,NA,1,NA,NA,,,NA,NA,0,NA,0,0,,,0,0,1,0,,
20944,CC004,43x44,1,0,0,12/13/16,1/3/17,1/26/17,3/20/17,1,97,76,,,97,NA,4,4/13/17,4,0,0,,4,0,1,1,,
20944,CC004,43x44,1,0,0,12/13/16,1/3/17,1/26/17,4/10/17,2,118,97,,,NA,21,4,NA,0,0,4,3 missing runts,0,4,1,0,3 missing runts,
20944,CC004,43x44,1,0,0,12/13/16,1/3/17,1/26/17,5/1/17,3,139,118,,,NA,21,4,5/25/17,3,0,1,1 runt,3,1,1,1,1 runt,
20944,CC004,43x44,1,0,0,12/13/16,1/3/17,1/26/17,5/27/17,4,165,144,,,NA,26,7,6/23/17,3,4,0,,7,0,1,1,,
20944,CC004,43x44,1,0,0,12/13/16,1/3/17,1/26/17,6/21/17,5,190,169,,,NA,25,4,7/13/17,3,1,0,,4,0,1,1,,
20944,CC004,43x44,1,0,0,12/13/16,1/3/17,1/26/17,9/1/17,6,262,241,,,NA,72,4,9/22/17,3,1,0,retired breeders 9/20/17,4,0,1,1,retired breeders 9/20/17,
20944,CC004,"441,442x443",0,1,0,1/21/18,1/21/18,2/19/18,NA,1,NA,NA,,,NA,NA,0,NA,0,0,,,0,0,1,0,,
20944,CC004,444x445,1,0,0,2/21/18,2/21/18,3/12/18,4/26/18,1,64,64,,,64,NA,8,5/14/18,3,4,1,1 missing,7,1,1,1,1 missing,
20944,CC004,444x445,1,0,0,2/21/18,2/21/18,3/12/18,6/11/18,2,110,110,,,NA,46,5,7/2/18,3,2,0,,5,0,1,1,,
20944,CC004,444x445,1,0,0,2/21/18,2/21/18,3/12/18,7/1/18,3,130,130,,,NA,20,6,7/23/18,4,1,1,,5,1,1,1,,
20944,CC004,444x445,1,0,0,2/21/18,2/21/18,3/12/18,8/19/18,4,179,179,,,NA,49,4,9/17/18,0,1,3,2 BD; 1 missing,1,3,1,1,2 BD; 1 missing,
20944,CC004,444x445,1,0,0,2/21/18,2/21/18,3/12/18,9/8/18,5,199,199,,,NA,20,5,NA,0,0,5,,0,5,1,0,,
20944,CC004,"446,447x448",0,1,0,1/30/18,1/30/18,3/12/18,4/8/18,1,68,68,,,68,NA,7,4/30/18,6,1,0,,7,0,1,1,,
20944,CC004,"446,447x448",0,1,0,1/30/18,1/30/18,3/12/18,4/16/18,2,76,76,,,NA,NA,4,5/14/18,3,1,0,,4,0,1,1,,
20944,CC004,"446,447x448",0,1,0,1/30/18,1/30/18,3/12/18,5/6/18,3,96,96,,,NA,NA,3,NA,0,0,3,missing,0,3,1,0,missing,
20944,CC004,"446,447x448",0,1,0,1/30/18,1/30/18,3/12/18,5/16/18,4,106,106,,,NA,NA,4,6/4/18,1,2,1,1 missing,3,1,1,1,1 missing,
20944,CC004,"446,447x448",0,1,0,1/30/18,1/30/18,3/12/18,6/4/18,5,125,125,,,NA,NA,5,6/25/18,2,0,3,3 missing,2,3,1,1,3 missing,
20944,CC004,"446,447x448",0,1,0,1/30/18,1/30/18,3/12/18,6/16/18,6,137,137,,,NA,NA,3,7/2/18,2,1,0,,3,0,1,1,,
20944,CC004,"446,447x448",0,1,0,1/30/18,1/30/18,3/12/18,6/24/18,7,145,145,,,NA,NA,2,7/16/18,2,0,0,,2,0,1,1,,
20944,CC004,"446,447x448",0,1,0,1/30/18,1/30/18,3/12/18,7/10/18,8,161,161,,,NA,NA,1,NA,0,0,1,missing,0,1,1,0,missing,
20944,CC004,"446,447x448",0,1,0,1/30/18,1/30/18,3/12/18,7/16/18,9,167,167,,,NA,NA,7,8/6/18,2,4,1,1 BD,6,1,1,1,1 BD,
20944,CC004,"446,447x448",0,1,0,1/30/18,1/30/18,3/12/18,9/14/18,10,227,227,,,NA,NA,1,NA,0,0,1,1 BD; 446 FD 8/31/18,0,1,1,0,1 BD; 446 FD 8/31/18,
20944,CC004,449x450,1,0,0,1/30/18,1/30/18,3/12/18,5/1/18,1,91,91,,,91,NA,6,5/29/18,4,2,0,LNR,6,0,1,1,LNR,
20944,CC004,449x450,1,0,0,1/30/18,1/30/18,3/12/18,6/10/18,2,131,131,,,NA,40,4,7/2/18,3,1,0,,4,0,1,1,,
20944,CC004,449x450,1,0,0,1/30/18,1/30/18,3/12/18,7/2/18,3,153,153,,,NA,22,9,NA,0,0,9,7 missing,0,9,1,0,7 missing,
20944,CC004,449x450,1,0,0,1/30/18,1/30/18,3/12/18,8/26/18,4,208,208,,,NA,55,5,9/17/18,2,3,0,,5,0,1,1,,
20944,CC004,"45,46x47",0,1,0,12/13/16,1/3/17,1/26/17,NA,1,NA,NA,,,NA,NA,0,NA,0,0,,,0,0,1,0,nonproductive,
20944,CC004,"451,452x453",0,1,0,2/27/18,2/27/18,4/2/18,5/10/18,1,72,72,,,72,NA,11,5/28/18,2,6,3,3 mutant,8,3,1,1,3 mutant,
20944,CC004,"451,452x453",0,1,0,2/27/18,2/27/18,4/2/18,6/28/18,2,121,121,,,NA,NA,10,7/16/18,2,8,0,nonproductive 10/1/18,10,0,1,1,nonproductive 10/1/18,
20944,CC004,454x455,1,0,0,2/27/18,2/27/18,4/2/18,NA,1,NA,NA,,,NA,NA,0,NA,0,0,0,,0,0,1,0,,
20944,CC004,"462,463x464",0,1,0,4/8/18,4/8/18,4/30/18,NA,1,NA,NA,,,NA,NA,0,NA,0,0,0,nonproductive 10/8/18,0,0,1,0,nonproductive 10/8/18,
20944,CC004,"471,472x473",0,1,0,5/1/18,5/1/18,5/29/18,NA,1,NA,NA,,,NA,NA,0,NA,0,0,0,nonproductive 10/8/18,0,0,1,0,nonproductive 10/8/18,
20944,CC004,"474,475x476",0,1,0,5/1/18,5/1/18,5/29/18,NA,1,NA,NA,,,NA,NA,0,NA,0,0,0,nonproductive 10/8/18,0,0,1,0,nonproductive 10/8/18,
20944,CC004,479x480,1,0,0,5/16/18,5/16/18,6/4/18,NA,1,NA,NA,,,NA,NA,0,NA,0,0,0,nonproductive 10/8/18,0,0,1,0,nonproductive 10/8/18,
20944,CC004,481x482,1,0,0,5/18/18,5/18/18,6/4/18,NA,1,NA,NA,,,NA,NA,0,NA,0,0,0,nonproductive 10/8/18,0,0,1,0,nonproductive 10/8/18,
20944,CC004,48x49,1,0,0,12/13/16,1/3/17,1/26/17,NA,1,NA,NA,,,NA,NA,0,NA,0,0,,,0,0,1,0,nonproductive,
20944,CC004,"50,51x52",0,1,0,1/30/17,1/30/17,2/23/17,5/21/17,1,111,111,,,111,NA,1,NA,0,0,1,0,0,1,1,0,,
20944,CC004,"53,54x55",0,1,0,2/16/17,2/16/17,3/9/17,NA,1,NA,NA,,,NA,NA,0,NA,0,0,0,,0,0,1,0,,
20944,CC004,56x57,1,0,0,2/16/17,2/16/17,3/9/17,NA,1,NA,NA,,,NA,NA,0,NA,0,0,0,,0,0,1,0,,
20944,CC004,"58,59x60",0,1,0,3/9/17,3/9/17,3/31/17,NA,1,NA,NA,,,NA,NA,0,NA,0,0,0,0,0,0,1,0,,
20944,CC004,61x62,1,0,0,3/9/17,3/9/17,3/31/17,NA,1,NA,NA,,,NA,NA,0,NA,0,0,0,0,0,0,1,0,,
20944,CC004,63x64,1,0,0,3/4/17,3/4/17,3/31/17,NA,1,NA,NA,,,NA,NA,0,NA,0,0,0,0,0,0,1,0,,
20944,CC004,"65,66x67",0,1,0,3/10/17,3/10/17,3/31/17,NA,1,NA,NA,,,NA,NA,0,NA,0,0,0,0,0,0,1,0,,
20944,CC004,68x69,1,0,0,3/10/17,3/10/17,3/31/18,NA,1,NA,NA,,,NA,NA,0,NA,0,0,0,0,0,0,1,0,,
20944,CC004,70x71,1,0,0,3/7/17,3/7/17,3/31/17,NA,1,NA,NA,,,NA,NA,0,NA,0,0,0,0,0,0,1,0,,
20944,CC004,72x73,1,0,0,3/28/17,3/28/17,4/20/17,NA,1,NA,NA,,,NA,NA,0,NA,0,0,0,0,0,0,1,0,,
20944,CC004,"74,75x76",0,1,0,4/8/17,4/8/17,5/5/17,6/22/17,1,75,75,,,75,NA,5,7/13/17,3,2,0,,5,0,1,1,,
20944,CC004,"74,75x76",0,1,0,4/8/17,4/8/17,5/5/17,8/10/17,2,124,124,,,NA,NA,3,8/30/17,0,2,1,1 missing,2,1,1,1,1 missing,
20944,CC004,"74,75x76",0,1,0,4/8/17,4/8/17,5/5/17,8/30/17,3,144,144,,,NA,NA,3,9/22/17,1,1,1,1 missing,2,1,1,1,1 missing,
20944,CC004,"74,75x76",0,1,0,4/8/17,4/8/17,5/5/17,11/21/17,4,227,227,,,NA,NA,3,12/19/17,3,0,0,,3,0,1,1,,
20944,CC004,"77,78x79",0,1,0,4/10/17,4/10/17,5/5/17,NA,1,NA,NA,,,NA,NA,0,NA,0,0,0,77 escaped 5/15/17,0,0,1,0,77 escaped 5/15/17,
20944,CC004,80x81,1,0,0,6/4/17,6/4/17,6/29/17,NA,1,NA,NA,,,NA,NA,0,NA,0,0,0,,0,0,1,0,,
20944,CC004,"82,83x84",0,1,0,5/2/17,5/2/17,7/6/17,NA,1,NA,NA,,,NA,NA,0,NA,0,0,0,,0,0,1,0,,
20944,CC004,"85,86x87",0,1,0,5/2/17,5/2/17,7/6/17,7/30/17,1,89,89,,,89,NA,9,8/25/17,4,4,,,8,1,1,1,,
20944,CC004,"85,86x87",0,1,0,5/2/17,5/2/17,7/6/17,9/8/17,2,129,129,,,NA,NA,3,9/29/17,2,1,,,3,0,1,1,,
20944,CC004,"85,86x87",0,1,0,5/2/17,5/2/17,7/6/17,9/21/17,3,142,142,,,NA,NA,6,10/20/17,4,2,,,6,0,1,1,,
20944,CC004,"85,86x87",0,1,0,5/2/17,5/2/17,7/6/17,11/14/17,4,196,196,,,NA,NA,1,11/19/17,0,0,,,0,1,1,0,,
20944,CC004,"88,89x90",0,1,0,4/25/17,4/25/17,7/6/17,NA,1,NA,NA,,,NA,NA,0,NA,0,0,0,,0,0,1,0,,
20944,CC004,"91,92x93",0,1,0,4/25/17,4/25/17,7/6/17,NA,1,NA,NA,,,NA,NA,0,NA,0,0,0,,0,0,1,0,,
20944,CC004,94x95,1,0,0,4/25/17,5/2/17,7/6/17,7/29/17,1,95,88,,,95,NA,3,8/25/17,2,0,1,1 missing,2,1,1,1,1 missing,
20944,CC004,94x95,1,0,0,4/25/17,5/2/17,7/6/17,8/19/17,2,116,109,,,NA,21,3,9/15/17,2,1,0,,3,0,1,1,,
20944,CC004,94x95,1,0,0,4/25/17,5/2/17,7/6/17,9/11/17,3,139,132,,,NA,23,4,10/5/17,3,1,0,,4,0,1,1,,
20944,CC004,94x95,1,0,0,4/25/17,5/2/17,7/6/17,10/7/17,4,165,158,,,NA,26,2,11/2/17,2,0,0,,2,0,1,1,,
20944,CC004,94x95,1,0,0,4/25/17,5/2/17,7/6/17,10/29/17,5,187,180,,,NA,22,2,NA,0,0,2,2 missing,0,2,1,0,2 missing,
20944,CC004,94x95,1,0,0,4/25/17,5/2/17,7/6/17,11/26/17,6,215,208,,,NA,28,1,NA,0,0,1,missing; 2 BD,0,1,1,0,missing; 2 BD,
20944,CC004,94x95,1,0,0,4/25/17,5/2/17,7/6/17,12/22/17,7,241,234,,,NA,26,6,1/18/18,3,3,0,,6,0,1,1,,
20944,CC004,"96,97x98",0,1,0,6/21/17,6/21/17,7/13/17,8/28/17,1,68,68,,,68,NA,7,9/22/17,4,3,0,96 sick 7/31/17,7,0,1,1,96 sick 7/31/17,
20944,CC004,"99,100x108",0,1,0,6/30/17,6/30/17,7/20/17,12/6/17,1,159,159,,,159,NA,5,12/26/17,2,1,2,2 BD,3,2,1,1,2 BD,
20945,CC005,"100,101x102",0,1,0,10/27/16,10/27/16,11/18/16,1/17/17,1,82,82,,,82,NA,5,2/9/17,3,2,0,0,5,0,1,1,,
20945,CC005,"100,101x102",0,1,0,10/27/16,10/27/16,11/18/16,3/4/17,2,128,128,,,NA,NA,2,3/31/17,0,1,NA,NA,1,1,1,1,,
20945,CC005,"100,101x102",0,1,0,10/27/16,10/27/16,11/18/16,4/24/17,3,179,179,,,NA,NA,3,5/18/17,2,1,0,0,3,0,1,1,,
20945,CC005,100x101,1,0,0,9/10/16,9/10/16,10/5/16,12/9/16,1,90,90,,,90,NA,3,12/29/16,1,2,,,3,0,1,1,,
20945,CC005,100x101,1,0,0,9/10/16,9/10/16,10/5/16,1/6/17,2,118,118,,,NA,28,5,1/26/17,2,3,,,5,0,1,1,,
20945,CC005,100x101,1,0,0,9/10/16,9/10/16,10/5/16,2/10/17,3,153,153,,,NA,35,3,3/3/17,0,3,,,3,0,1,1,,
20945,CC005,"103,104x105",0,1,0,10/27/16,10/27/16,11/18/16,1/9/17,1,74,74,,,74,NA,1,2/3/17,0,1,0,0,1,0,1,1,,
20945,CC005,"103,104x105",0,1,0,10/27/16,10/27/16,11/18/16,1/19/17,2,84,84,,,NA,NA,4,2/9/17,0,4,0,0,4,0,1,1,,
20945,CC005,"103,104x105",0,1,0,10/27/16,10/27/16,11/18/16,1/31/17,3,96,96,,,NA,NA,1,2/23/17,0,1,0,0,1,0,1,1,,
20945,CC005,"103,104x105",0,1,0,10/27/16,10/27/16,11/18/16,2/23/17,4,119,119,,,NA,NA,6,3/16/17,2,1,2,NA,3,3,1,1,,
20945,CC005,"103,104x105",0,1,0,10/27/16,10/27/16,11/18/16,4/24/17,5,179,179,,,NA,NA,4,5/18/17,2,1,1,0,3,1,1,1,,
20945,CC005,"103,104x105",0,1,0,10/27/16,10/27/16,11/18/16,5/16/17,6,201,201,,,NA,NA,5,6/8/17,2,3,0,0,5,0,1,1,,
20945,CC005,"103,104x105",0,1,0,10/27/16,10/27/16,11/18/16,5/27/17,7,212,212,,,NA,NA,1,6/23/17,1,0,0,0,1,0,1,1,,
20945,CC005,"103,104x105",0,1,0,10/27/16,10/27/16,11/18/16,6/14/17,8,230,230,,,NA,NA,2,7/6/17,0,2,0,0,2,0,1,1,,
20945,CC005,"108,109x110",0,1,0,11/24/16,11/24/16,12/16/16,3/10/17,1,106,106,,,106,NA,4,3/31/17,2,2,0,0,4,0,1,1,,
20945,CC005,"108,109x110",0,1,0,11/24/16,11/24/16,12/16/16,3/27/17,2,123,123,,,NA,NA,2,NA,NA,NA,NA,NA,NA,NA,1,0,,
20945,CC005,"108,109x110",0,1,0,11/24/16,11/24/16,12/16/16,4/5/17,3,132,132,,,NA,NA,6,4/27/17,2,4,0,0,6,0,1,1,,
20945,CC005,"108,109x110",0,1,0,11/24/16,11/24/16,12/16/16,5/19/17,4,176,176,,,NA,NA,2,6/8/17,2,0,0,0,2,0,1,1,,
20945,CC005,"108,109x110",0,1,0,11/24/16,11/24/16,12/16/16,5/22/17,5,179,179,,,NA,NA,4,6/16/17,3,1,0,0,4,0,1,1,,
20945,CC005,"108,109x110",0,1,0,11/24/16,11/24/16,12/16/16,6/15/17,6,203,203,,,NA,NA,2,7/6/17,1,1,0,0,2,0,1,1,,
20945,CC005,"108,109x110",0,1,0,11/24/16,11/24/16,12/16/16,6/17/17,7,205,205,,,NA,NA,3,7/13/17,2,1,0,0,3,0,1,1,,
20945,CC005,"108,109x110",0,1,0,11/24/16,11/24/16,12/16/16,7/10/17,8,228,228,,,NA,NA,6,NA,4,1,1,0,5,1,1,1,,
20945,CC005,111x112,1,0,0,12/13/16,12/13/16,1/6/17,3/15/17,1,92,92,,,92,NA,2,4/7/17,1,1,0,0,2,0,1,1,,
20945,CC005,111x112,1,0,0,12/13/16,12/13/16,1/6/17,4/8/17,2,116,116,,,NA,24,5,5/5/17,4,1,0,0,5,0,1,1,,
20945,CC005,"113,114x115",0,1,0,12/24/16,12/24/16,1/20/17,5/24/17,1,151,151,,,151,NA,2,6/18/17,0,2,0,,2,0,1,1,,
20945,CC005,"113,114x115",0,1,0,12/24/16,12/24/16,1/20/17,5/22/17,2,149,149,,,NA,NA,2,6/16/17,0,2,0,,2,0,1,1,,
20945,CC005,"113,114x115",0,1,0,12/24/16,12/24/16,1/20/17,6/17/17,3,175,175,,,NA,NA,1,7/13/17,0,1,0,,1,0,1,1,,
20945,CC005,"113,114x115",0,1,0,12/24/16,12/24/16,1/20/17,8/5/17,4,224,224,,,NA,NA,3,8/31/17,2,1,0,,3,0,1,1,,
20945,CC005,"113,114x115",0,1,0,12/24/16,12/24/16,1/20/17,9/26/17,5,276,276,,,NA,NA,3,10/20/17,3,0,0,113 FD 7/31/17,3,0,1,1,113 FD 7/31/17,
20945,CC005,"119,120x121",0,1,0,1/3/17,1/3/17,3/8/17,3/27/17,1,83,83,,,83,NA,3,4/20/17,3,0,0,,3,0,1,1,,
20945,CC005,"119,120x121",0,1,0,1/3/17,1/3/17,3/8/17,7/14/17,2,192,192,,,NA,NA,4,8/10/17,1,3,0,,4,0,1,1,,
20945,CC005,"119,120x121",0,1,0,1/3/17,1/3/17,3/8/17,8/8/17,3,217,217,,,NA,NA,6,8/31/17,3,3,0,,6,0,1,1,,
20945,CC005,"119,120x121",0,1,0,1/3/17,1/3/17,3/8/17,10/15/17,4,285,285,,,NA,NA,1,NA,0,0,1,1 missing,0,1,1,0,1 missing,
20945,CC005,"122,123x124",0,1,0,1/3/17,1/3/17,3/8/17,3/29/17,1,85,85,,,85,NA,4,4/20/17,2,2,0,,4,0,1,1,,
20945,CC005,"122,123x124",0,1,0,1/3/17,1/3/17,3/8/17,5/25/17,2,142,142,,,NA,NA,5,6/16/17,0,5,0,,5,0,1,1,,
20945,CC005,"122,123x124",0,1,0,1/3/17,1/3/17,3/8/17,6/17/17,3,165,165,,,NA,NA,7,7/13/17,2,5,0,,7,0,1,1,,
20945,CC005,"122,123x124",0,1,0,1/3/17,1/3/17,3/8/17,7/13/17,4,191,191,,,NA,NA,10,8/10/17,6,4,0,,10,0,1,1,,
20945,CC005,"122,123x124",0,1,0,1/3/17,1/3/17,3/8/17,8/31/17,5,240,240,,,NA,NA,4,9/22/17,3,0,1,1 missing,3,1,1,1,1 missing,
20945,CC005,"122,123x124",0,1,0,1/3/17,1/3/17,3/8/17,9/7/17,6,247,247,,,NA,NA,3,9/29/17,1,2,0,,3,0,1,1,,
20945,CC005,"122,123x124",0,1,0,1/3/17,1/3/17,3/8/17,9/23/17,7,263,263,,,NA,NA,2,10/20/17,1,0,1,1 missing,1,1,1,1,1 missing,
20945,CC005,"122,123x124",0,1,0,1/3/17,1/3/17,3/8/17,10/5/17,8,275,275,,,NA,NA,5,10/26/17,2,2,1,,4,1,1,1,,
20945,CC005,"125,126x127",0,1,0,2/23/17,2/23/17,3/16/17,5/12/17,1,78,78,,,78,NA,7,6/2/17,1,6,0,,7,0,1,1,,
20945,CC005,"125,126x127",0,1,0,2/23/17,2/23/17,3/16/17,5/29/17,2,95,95,,,NA,NA,2,NA,0,0,2,2 missing,0,2,1,0,2 missing,
20945,CC005,"125,126x127",0,1,0,2/23/17,2/23/17,3/16/17,6/11/17,3,108,108,,,NA,NA,4,7/6/17,4,0,0,,4,0,1,1,,
20945,CC005,"125,126x127",0,1,0,2/23/17,2/23/17,3/16/17,6/18/17,4,115,115,,,NA,NA,1,7/13/17,0,1,0,,1,0,1,1,,
20945,CC005,"125,126x127",0,1,0,2/23/17,2/23/17,3/16/17,7/5/17,5,132,132,,,NA,NA,1,NA,0,0,1,1 missing,0,1,1,0,1 missing,
20945,CC005,"125,126x127",0,1,0,2/23/17,2/23/17,3/16/17,7/13/17,6,140,140,,,NA,NA,5,8/10/17,3,2,0,,5,0,1,1,,
20945,CC005,"125,126x127",0,1,0,2/23/17,2/23/17,3/16/17,7/26/17,7,153,153,,,NA,NA,1,8/17/17,1,0,0,,1,0,1,1,,
20945,CC005,"125,126x127",0,1,0,2/23/17,2/23/17,3/16/17,8/9/17,8,167,167,,,NA,NA,4,8/31/17,4,0,0,,4,0,1,1,,
20945,CC005,"125,126x127",0,1,0,2/23/17,2/23/17,3/16/17,8/19/17,9,177,177,,,NA,NA,2,NA,0,0,2,missing,0,2,1,0,missing,
20945,CC005,"125,126x127",0,1,0,2/23/17,2/23/17,3/16/17,10/6/17,10,225,225,,,NA,NA,6,NA,0,0,6,missing,0,6,1,0,missing,
20945,CC005,"125,126x127",0,1,0,2/23/17,2/23/17,3/16/17,11/1/17,11,251,251,,,NA,NA,4,11/21/17,4,0,0,,4,0,1,1,,
20945,CC005,"125,126x127",0,1,0,2/23/17,2/23/17,3/16/17,11/21/17,12,271,271,,,NA,NA,3,12/13/17,2,1,0,,3,0,1,1,,
20945,CC005,"125,126x127",0,1,0,2/23/17,2/23/17,3/16/17,11/29/17,13,279,279,,,NA,NA,1,12/19/17,1,0,0,,1,0,1,1,,
20945,CC005,"125,126x127",0,1,0,2/23/17,2/23/17,3/16/17,12/25/17,14,305,305,,,NA,NA,2,1/24/18,1,1,0,,2,0,1,1,,
20945,CC005,"125,126x127",0,1,0,2/23/17,2/23/17,3/16/17,1/19/18,15,330,330,,,NA,NA,3,NA,1,1,1,1 missing,2,1,1,1,1 missing,
20945,CC005,"128,129x130",0,1,0,3/22/17,3/22/17,4/13/17,6/10/17,1,80,80,,,80,NA,5,7/6/17,3,1,1,1 missing,4,1,1,1,1 missing,
20945,CC005,"128,129x130",0,1,0,3/22/17,3/22/17,4/13/17,7/4/17,2,104,104,,,NA,NA,4,8/4/17,0,3,1,1 female AH,3,1,1,1,1 female AH,
20945,CC005,"128,129x130",0,1,0,3/22/17,3/22/17,4/13/17,7/15/17,3,115,115,,,NA,NA,1,NA,0,0,1,,0,1,1,0,,
20945,CC005,"128,129x130",0,1,0,3/22/17,3/22/17,4/13/17,7/27/17,4,127,127,,,NA,NA,2,8/17/17,1,1,0,,2,0,1,1,,
20945,CC005,"128,129x130",0,1,0,3/22/17,3/22/17,4/13/17,8/10/17,5,141,141,,,NA,NA,3,8/31/17,1,1,1,1 missing,2,1,1,1,1 missing,
20945,CC005,"128,129x130",0,1,0,3/22/17,3/22/17,4/13/17,8/21/17,6,152,152,,,NA,NA,1,9/15/17,0,1,0,,1,0,1,1,,
20945,CC005,"128,129x130",0,1,0,3/22/17,3/22/17,4/13/17,9/2/17,7,164,164,,,NA,NA,5,9/29/17,2,2,1,1 missing,4,1,1,1,1 missing,
20945,CC005,"128,129x130",0,1,0,3/22/17,3/22/17,4/13/17,9/16/17,8,178,178,,,NA,NA,1,NA,0,0,1,3 BD; 1 missing,0,1,1,0,3 BD; 1 missing,
20945,CC005,"128,129x130",0,1,0,3/22/17,3/22/17,4/13/17,9/29/17,9,191,191,,,NA,NA,1,NA,0,0,1,1 missing,0,1,1,0,1 missing,
20945,CC005,"128,129x130",0,1,0,3/22/17,3/22/17,4/13/17,10/22/17,10,214,214,,,NA,NA,1,NA,0,0,1,1 missing,0,1,1,0,1 missing,
20945,CC005,"131,132x133",0,1,0,4/15/17,4/15/17,5/12/17,7/27/17,1,103,103,,,103,NA,6,8/17/17,1,5,0,,6,0,1,1,,
20945,CC005,"131,132x133",0,1,0,4/15/17,4/15/17,5/12/17,8/6/17,2,113,113,,,NA,NA,4,8/31/17,1,2,1,1 missing,3,1,1,1,1 missing,
20945,CC005,"131,132x133",0,1,0,4/15/17,4/15/17,5/12/17,8/21/17,3,128,128,,,NA,NA,3,9/15/17,2,1,0,,3,0,1,1,,
20945,CC005,"131,132x133",0,1,0,4/15/17,4/15/17,5/12/17,8/30/17,4,137,137,,,NA,NA,2,9/22/17,0,2,0,,2,0,1,1,,
20945,CC005,"131,132x133",0,1,0,4/15/17,4/15/17,5/12/17,10/12/17,5,180,180,,,NA,NA,3,11/2/17,1,2,0,,3,0,1,1,,
20945,CC005,"131,132x133",0,1,0,4/15/17,4/15/17,5/12/17,10/16/17,6,184,184,,,NA,NA,7,11/8/17,3,2,2,2 missing,5,2,1,1,2 missing,
20945,CC005,"131,132x133",0,1,0,4/15/17,4/15/17,5/12/17,11/11/17,7,210,210,,,NA,NA,5,NA,0,0,5,missing 11/22/17,0,5,1,0,missing 11/22/17,
20945,CC005,"131,132x133",0,1,0,4/15/17,4/15/17,5/12/17,12/1/17,8,230,230,,,NA,NA,6,12/28/17,2,4,0,,6,0,1,1,,
20945,CC005,"131,132x133",0,1,0,4/15/17,4/15/17,5/12/17,1/19/18,9,279,279,,,NA,NA,5,2/14/18,0,4,1,,4,1,1,1,,
20945,CC005,"134,135x136",0,1,0,5/16/17,5/16/17,6/8/17,7/31/17,1,76,76,,,76,NA,3,8/25/17,2,1,,,3,0,1,1,,
20945,CC005,"134,135x136",0,1,0,5/16/17,5/16/17,6/8/17,8/15/17,2,91,91,,,NA,NA,1,9/8/17,1,0,,,1,0,1,1,,
20945,CC005,"134,135x136",0,1,0,5/16/17,5/16/17,6/8/17,8/25/17,3,101,101,,,NA,NA,4,9/15/17,0,4,,,4,0,1,1,,
20945,CC005,"134,135x136",0,1,0,5/16/17,5/16/17,6/8/17,9/7/17,4,114,114,,,NA,NA,2,9/29/17,2,0,,,2,0,1,1,,
20945,CC005,"134,135x136",0,1,0,5/16/17,5/16/17,6/8/17,10/1/17,5,138,138,,,NA,NA,4,10/26/17,3,1,,,4,0,1,1,,
20945,CC005,"134,135x136",0,1,0,5/16/17,5/16/17,6/8/17,10/16/17,6,153,153,,,NA,NA,6,11/8/17,0,0,,,0,6,1,0,"2 born dead, 3 missing",
20945,CC005,"134,135x136",0,1,0,5/16/17,5/16/17,6/8/17,10/28/17,7,165,165,,,NA,NA,3,11/21/17,1,2,,,3,0,1,1,,
20945,CC005,"134,135x136",0,1,0,5/16/17,5/16/17,6/8/17,11/21/17,8,189,189,,,NA,NA,7,12/13/17,2,4,,,6,1,1,1,,
20945,CC005,"134,135x136",0,1,0,5/16/17,5/16/17,6/8/17,11/9/17,9,177,177,,,NA,NA,3,12/13/17,2,1,,,3,0,1,1,,
20945,CC005,"134,135x136",0,1,0,5/16/17,5/16/17,6/8/17,1/4/18,10,233,233,,,NA,NA,6,2/2/18,1,5,,,6,0,1,1,,
20945,CC005,"134,135x136",0,1,0,5/16/17,5/16/17,6/8/17,2/5/18,11,265,265,,,NA,NA,2,3/7/18,1,1,,,2,0,1,1,,
20945,CC005,"134,135x136",0,1,0,5/16/17,5/16/17,6/8/17,2/21/18,12,281,281,2/27/18,,NA,NA,2,3/20/18,2,0,,,2,0,2,2,,
20945,CC005,"134,135x136",0,1,0,5/16/17,5/16/17,6/8/17,3/20/18,13,308,308,3/23/18,,NA,NA,11,4/17/18,4,4,,,8,3,2,2,,
20945,CC005,"137,138x139",0,1,0,4/5/17,4/5/17,7/6/17,NA,1,NA,NA,,,NA,NA,0,NA,0,0,0,,0,0,1,0,,
20945,CC005,"140,141x142",0,1,0,7/17/17,7/17/17,8/10/17,NA,1,NA,NA,,,NA,NA,0,NA,0,0,0,,0,0,1,0,,
20945,CC005,"140A,141Ax142A",0,1,0,6/17/17,6/17/17,7/13/17,9/6/17,1,81,81,,,81,NA,1,NA,0,0,1,runts,0,1,1,0,runts,
20945,CC005,"140A,141Ax142A",0,1,0,6/17/17,6/17/17,7/13/17,9/27/17,2,102,102,,,NA,NA,2,10/20/17,1,1,0,,2,0,1,1,,
20945,CC005,"140A,141Ax142A",0,1,0,6/17/17,6/17/17,7/13/17,10/20/17,3,125,125,,,NA,NA,7,11/8/17,2,5,0,,7,0,1,1,,
20945,CC005,"140A,141Ax142A",0,1,0,6/17/17,6/17/17,7/13/17,12/6/17,4,172,172,,,NA,NA,2,12/28/17,0,2,0,,2,0,1,1,,
20945,CC005,"140A,141Ax142A",0,1,0,6/17/17,6/17/17,7/13/17,12/9/17,5,175,175,,,NA,NA,3,1/4/18,1,2,0,,3,0,1,1,,
20945,CC005,"140A,141Ax142A",0,1,0,6/17/17,6/17/17,7/13/17,12/30/17,6,196,196,1/7/18,,NA,NA,6,2/2/18,1,5,0,,6,0,2,2,,
20945,CC005,"140A,141Ax142A",0,1,0,6/17/17,6/17/17,7/13/17,2/14/18,7,242,242,,,NA,NA,2,NA,0,0,2,,0,2,1,0,,
20945,CC005,"143,144x145",0,1,0,8/21/17,8/21/17,9/15/17,11/5/17,1,76,76,,,76,NA,2,NA,0,0,,,0,2,1,0,,
20945,CC005,"143,144x145",0,1,0,8/21/17,8/21/17,9/15/17,11/26/17,2,97,97,,,NA,NA,2,12/28/17,1,1,,,2,0,1,1,,
20945,CC005,"143,144x145",0,1,0,8/21/17,8/21/17,9/15/17,12/11/17,3,112,112,,,NA,NA,5,1/4/18,2,2,,,4,1,1,1,1 FD,
20945,CC005,"143,144x145",0,1,0,8/21/17,8/21/17,9/15/17,12/19/17,4,120,120,,,NA,NA,4,1/18/18,1,3,,,4,0,1,1,,
20945,CC005,"143,144x145",0,1,0,8/21/17,8/21/17,9/15/17,1/29/18,5,161,161,,,NA,NA,2,3/2/18,0,2,,,2,0,1,1,,
20945,CC005,"143,144x145",0,1,0,8/21/17,8/21/17,9/15/17,2/10/18,6,173,173,,,NA,NA,5,3/7/18,1,4,,,5,0,1,1,,
20945,CC005,"143,144x145",0,1,0,8/21/17,8/21/17,9/15/17,3/7/18,7,198,198,,,NA,NA,5,4/5/18,3,1,,,4,1,1,1,missing,
20945,CC005,"143,144x145",0,1,0,8/21/17,8/21/17,9/15/17,3/30/18,8,221,221,,,NA,NA,3,4/25/18,1,1,,,2,1,1,1,missing,
20945,CC005,"143,144x145",0,1,0,8/21/17,8/21/17,9/15/17,4/15/18,9,237,237,,,NA,NA,6,5/15/18,1,4,,,5,1,1,1,missing,
20945,CC005,"143,144x145",0,1,0,8/21/17,8/21/17,9/15/17,4/22/18,10,244,244,,,NA,NA,4,5/15/18,1,0,,,1,3,1,1,3 missing,
20945,CC005,"143A,144Ax145A",0,1,0,7/31/17,7/31/17,8/25/17,10/20/17,1,81,81,,,81,NA,4,11/8/17,2,2,0,,4,0,1,1,,
20945,CC005,"143A,144Ax145A",0,1,0,7/31/17,7/31/17,8/25/17,11/6/17,2,98,98,,,NA,NA,2,12/6/17,2,0,0,,2,0,1,1,,
20945,CC005,"143A,144Ax145A",0,1,0,7/31/17,7/31/17,8/25/17,11/16/17,3,108,108,,,NA,NA,4,12/13/17,3,1,0,,4,0,1,1,,
20945,CC005,"143A,144Ax145A",0,1,0,7/31/17,7/31/17,8/25/17,12/12/17,4,134,134,,,NA,NA,7,1/18/18,2,5,0,,7,0,1,1,,
20945,CC005,"143A,144Ax145A",0,1,0,7/31/17,7/31/17,8/25/17,2/9/18,5,193,193,,,NA,NA,8,3/7/18,3,5,0,,8,0,1,1,,
20945,CC005,"143A,144Ax145A",0,1,0,7/31/17,7/31/17,8/25/17,3/7/18,6,219,219,,,NA,NA,3,NA,0,0,3,,0,3,1,0,,
20945,CC005,"146,147x148",0,1,0,10/16/17,10/16/17,11/30/17,1/4/18,1,80,80,,,80,NA,4,2/2/18,3,1,0,,4,0,1,1,,
20945,CC005,"146,147x148",0,1,0,10/16/17,10/16/17,11/30/17,1/10/18,2,86,86,,,NA,NA,6,2/7/18,4,2,0,,6,0,1,1,,
20945,CC005,"146,147x148",0,1,0,10/16/17,10/16/17,11/30/17,2/5/18,3,112,112,,,NA,NA,6,3/7/18,3,3,0,,6,0,1,1,,
20945,CC005,"146,147x148",0,1,0,10/16/17,10/16/17,11/30/17,3/18/18,4,153,153,,,NA,NA,2,4/17/18,2,0,0,,2,0,1,1,,
20945,CC005,"146,147x148",0,1,0,10/16/17,10/16/17,11/30/17,3/31/18,5,166,166,,,NA,NA,2,4/25/18,1,0,1,1 DU,1,1,1,1,1 DU,
20945,CC005,"146,147x148",0,1,0,10/16/17,10/16/17,11/30/17,4/9/18,6,175,175,,,NA,NA,2,5/8/18,1,1,0,,2,0,1,1,,
20945,CC005,"146,147x148",0,1,0,10/16/17,10/16/17,11/30/17,4/21/18,7,187,187,,,NA,NA,3,5/22/18,2,1,0,,3,0,1,1,,
20945,CC005,"146,147x148",0,1,0,10/16/17,10/16/17,11/30/17,5/16/18,8,212,212,,,NA,NA,4,6/13/18,2,2,0,,4,0,1,1,,
20945,CC005,"146,147x148",0,1,0,10/16/17,10/16/17,11/30/17,6/15/18,9,242,242,,,NA,NA,5,7/11/18,2,3,0,,5,0,1,1,,
20945,CC005,"146,147x148",0,1,0,10/16/17,10/16/17,11/30/17,6/30/18,10,257,257,,,NA,NA,3,7/31/18,1,1,1,1 FD,2,1,1,1,1 FD,
20945,CC005,"151,152x153",0,1,0,10/20/17,10/20/17,11/30/17,1/7/18,1,79,79,1/11/17,,79,NA,10,2/7/18,5,4,1,1 missing,9,1,2,2,1 missing,
20945,CC005,"151,152x153",0,1,0,10/20/17,10/20/17,11/30/17,3/7/18,2,138,138,,,NA,NA,7,4/5/18,2,4,1,,6,1,1,1,,
20945,CC005,"151,152x153",0,1,0,10/20/17,10/20/17,11/30/17,4/5/18,3,167,167,,,NA,NA,6,5/2/18,5,0,1,1 missing,5,1,1,1,1 missing,
20945,CC005,"151,152x153",0,1,0,10/20/17,10/20/17,11/30/17,5/2/18,4,194,194,,,NA,NA,7,5/30/18,2,3,2,2 missing,5,2,1,1,2 missing,
20945,CC005,"151,152x153",0,1,0,10/20/17,10/20/17,11/30/17,5/30/18,5,222,222,,,NA,NA,4,6/26/18,3,1,0,,4,0,1,1,,
20945,CC005,"151,152x153",0,1,0,10/20/17,10/20/17,11/30/17,6/26/18,6,249,249,,,NA,NA,2,NA,0,0,2,2 missing; 1 BD,0,2,1,0,2 missing; 1 BD,
20945,CC005,"154,155x156",0,1,0,11/9/17,11/9/17,12/28/17,1/23/18,1,75,75,,,75,NA,5,3/7/18,1,4,0,,5,0,1,1,,
20945,CC005,"154,155x156",0,1,0,11/9/17,11/9/17,12/28/17,2/18/18,2,101,101,,,NA,NA,6,3/20/18,4,2,0,,6,0,1,1,,
20945,CC005,"154,155x156",0,1,0,11/9/17,11/9/17,12/28/17,3/16/18,3,127,127,,,NA,NA,1,NA,0,0,1,missing,0,1,1,0,missing,
20945,CC005,"154,155x156",0,1,0,11/9/17,11/9/17,12/28/17,4/4/18,4,146,146,,,NA,NA,3,5/2/18,2,1,0,,3,0,1,1,,
20945,CC005,"154,155x156",0,1,0,11/9/17,11/9/17,12/28/17,5/2/18,5,174,174,,,NA,NA,5,5/30/18,3,2,0,1 BD,5,0,1,1,1 BD,
20945,CC005,"154,155x156",0,1,0,11/9/17,11/9/17,12/28/17,5/31/18,6,203,203,,,NA,NA,5,6/26/18,1,4,0,,5,0,1,1,,
20945,CC005,"154,155x156",0,1,0,11/9/17,11/9/17,12/28/17,6/27/18,7,230,230,,,NA,NA,4,7/24/18,2,2,0,,4,0,1,1,,
20945,CC005,"154,155x156",0,1,0,11/9/17,11/9/17,12/28/17,7/25/18,8,258,258,,,NA,NA,3,8/24/18,2,1,0,,3,0,1,1,,
20945,CC005,"154,155x156",0,1,0,11/9/17,11/9/17,12/28/17,7/29/18,9,262,262,,,NA,NA,1,8/30/18,0,1,0,,1,0,1,1,,
20945,CC005,"163,164x165",0,1,0,12/31/17,12/31/17,3/7/18,4/18/18,1,108,108,,,108,NA,1,5/15/18,0,1,0,,1,0,1,1,,
20945,CC005,"163,164x165",0,1,0,12/31/17,12/31/17,3/7/18,4/28/18,2,118,118,,,NA,NA,4,5/30/18,4,0,0,,4,0,1,1,,
20945,CC005,"76,77x78",0,1,0,4/27/16,4/27/16,5/20/16,7/25/16,1,89,89,,,89,NA,1,NA,0,0,1,missing,0,1,1,0,missing,
20945,CC005,"76,77x78",0,1,0,4/27/16,4/27/16,5/20/16,8/16/16,2,111,111,,,NA,NA,5,9/8/16,2,1,2,,3,2,1,1,,
20945,CC005,"76,77x78",0,1,0,4/27/16,4/27/16,5/20/16,10/21/16,3,177,177,,,NA,NA,5,11/11/16,1,3,1,,4,1,1,1,,
20945,CC005,"76,77x78",0,1,0,4/27/16,4/27/16,5/20/16,11/20/16,4,207,207,,,NA,NA,1,NA,0,0,1,,0,1,1,0,,
20945,CC005,"76,77x78",0,1,0,4/27/16,4/27/16,5/20/16,12/19/16,5,236,236,,,NA,NA,1,NA,0,0,1,retired breeders 1/6/17; 76 sick 10/5/16,0,1,1,0,retired breeders 1/6/17; 76 sick 10/5/16,
20945,CC005,"82,83x84",0,1,0,5/19/16,5/19/16,6/9/16,8/21/16,1,94,94,,,94,NA,3,NA,0,0,3,missing,0,3,1,0,missing,
20945,CC005,"82,83x84",0,1,0,5/19/16,5/19/16,6/9/16,9/19/16,2,123,123,,,NA,NA,2,10/13/16,1,1,0,,2,0,1,1,,
20945,CC005,"82,83x84",0,1,0,5/19/16,5/19/16,6/9/16,10/2/16,3,136,136,,,NA,NA,4,10/27/16,3,1,0,,4,0,1,1,,
20945,CC005,"82,83x84",0,1,0,5/19/16,5/19/16,6/9/16,10/27/16,4,161,161,,,NA,NA,6,11/18/16,4,2,0,,6,0,1,1,,
20945,CC005,"82,83x84",0,1,0,5/19/16,5/19/16,6/9/16,11/25/16,5,190,190,,,NA,NA,2,12/16/16,2,0,0,,2,0,1,1,,
20945,CC005,"82,83x84",0,1,0,5/19/16,5/19/16,6/9/16,12/7/16,6,202,202,,,NA,NA,1,12/29/16,0,1,0,,1,0,1,1,,
20945,CC005,"82,83x84",0,1,0,5/19/16,5/19/16,6/9/16,12/21/16,7,216,216,,,NA,NA,2,1/13/17,2,0,0,,2,0,1,1,,
20945,CC005,"82,83x84",0,1,0,5/19/16,5/19/16,6/9/16,12/31/16,8,226,226,,,NA,NA,1,1/26/17,0,1,0,,1,0,1,1,,
20945,CC005,"82,83x84",0,1,0,5/19/16,5/19/16,6/9/16,1/14/17,9,240,240,,,NA,NA,1,2/9/17,1,0,0,,1,0,1,1,,
20945,CC005,"82,83x84",0,1,0,5/19/16,5/19/16,6/9/16,1/24/17,10,250,250,,,NA,NA,2,NA,0,0,2,retired breeders 1/6/17,0,2,1,0,retired breeders 1/6/17,
20945,CC005,"85,86x87",0,1,0,6/2/16,6/2/16,6/24/16,8/7/16,1,66,66,,,66,NA,4,9/1/16,1,2,1,1 missing,3,1,1,1,1 missing,
20945,CC005,"85,86x87",0,1,0,6/2/16,6/2/16,6/24/16,9/1/16,2,91,91,,,NA,NA,4,9/23/16,3,1,0,,4,0,1,1,,
20945,CC005,"85,86x87",0,1,0,6/2/16,6/2/16,6/24/16,9/17/16,3,107,107,,,NA,NA,1,NA,0,0,1,,0,1,1,0,,
20945,CC005,"85,86x87",0,1,0,6/2/16,6/2/16,6/24/16,9/25/16,4,115,115,,,NA,NA,6,10/20/16,1,5,0,,6,0,1,1,,
20945,CC005,"85,86x87",0,1,0,6/2/16,6/2/16,6/24/16,10/10/16,5,130,130,,,NA,NA,5,NA,0,0,5,5 missing,0,5,1,0,5 missing,
20945,CC005,"85,86x87",0,1,0,6/2/16,6/2/16,6/24/16,10/21/16,6,141,141,,,NA,NA,3,11/11/16,3,0,0,,3,0,1,1,,
20945,CC005,"85,86x87",0,1,0,6/2/16,6/2/16,6/24/16,11/2/16,7,153,153,,,NA,NA,4,11/22/16,2,2,0,,4,0,1,1,,
20945,CC005,"85,86x87",0,1,0,6/2/16,6/2/16,6/24/16,11/17/16,8,168,168,,,NA,NA,1,12/9/16,1,0,0,,1,0,1,1,,
20945,CC005,"85,86x87",0,1,0,6/2/16,6/2/16,6/24/16,11/26/16,9,177,177,,,NA,NA,5,12/21/16,3,1,1,1 missing; retired breeders 1/6/17,4,1,1,1,1 missing; retired breeders 1/6/17,
20945,CC005,"88,89x90",0,1,0,6/27/16,6/27/16,7/21/16,9/18/16,1,83,83,,,83,NA,2,10/13/16,1,1,0,,2,0,1,1,,
20945,CC005,"88,89x90",0,1,0,6/27/16,6/27/16,7/21/16,10/12/16,2,107,107,,,NA,NA,2,11/3/16,0,1,1,1 missing,1,1,1,1,1 missing,
20945,CC005,"88,89x90",0,1,0,6/27/16,6/27/16,7/21/16,11/1/16,3,127,127,,,NA,NA,3,11/22/16,1,2,0,,3,0,1,1,,
20945,CC005,"88,89x90",0,1,0,6/27/16,6/27/16,7/21/16,11/24/16,4,150,150,,,NA,NA,4,12/16/16,2,2,0,,4,0,1,1,,
20945,CC005,"88,89x90",0,1,0,6/27/16,6/27/16,7/21/16,11/28/16,5,154,154,,,NA,NA,4,12/21/16,2,2,0,,4,0,1,1,,
20945,CC005,"88,89x90",0,1,0,6/27/16,6/27/16,7/21/16,12/22/16,6,178,178,,,NA,NA,5,1/13/17,3,2,0,,5,0,1,1,,
20945,CC005,"88,89x90",0,1,0,6/27/16,6/27/16,7/21/16,1/15/17,7,202,202,,,NA,NA,2,2/9/17,0,2,0,retired breeders 2/17/17,2,0,1,1,retired breeders 2/17/17,
20945,CC005,"91,92x93",0,1,0,7/27/16,7/27/16,8/18/16,1/4/17,1,161,161,,,161,NA,1,NA,0,0,,,0,1,1,0,,
20945,CC005,"91,92x93",0,1,0,7/27/16,7/27/16,8/18/16,2/3/17,2,191,191,,,NA,NA,4,2/23/17,1,1,,,2,2,1,1,missing,
20945,CC005,"91,92x93",0,1,0,7/27/16,7/27/16,8/18/16,3/22/17,3,238,238,,,NA,NA,6,4/13/17,3,2,,,5,1,1,1,1 runt; female 91 sick 12/9/16; retired breeders 4/13/17,
20945,CC005,"94,95x96",0,1,0,8/16/16,8/16/16,9/8/16,11/16/16,1,92,92,,,92,NA,3,12/9/16,1,2,,,3,0,1,1,,
20945,CC005,"94,95x96",0,1,0,8/16/16,8/16/16,9/8/16,11/21/16,2,97,97,,,NA,NA,2,12/12/16,2,0,,,2,0,1,1,,
20945,CC005,"94,95x96",0,1,0,8/16/16,8/16/16,9/8/16,12/13/16,3,119,119,,,NA,NA,6,1/6/17,1,5,,,6,0,1,1,,
20945,CC005,"94,95x96",0,1,0,8/16/16,8/16/16,9/8/16,1/6/17,4,143,143,,,NA,NA,2,1/26/17,1,1,,,2,0,1,1,,
20945,CC005,"94,95x96",0,1,0,8/16/16,8/16/16,9/8/16,1/11/17,5,148,148,,,NA,NA,2,2/3/17,2,0,,,2,0,1,1,,
20945,CC005,"94,95x96",0,1,0,8/16/16,8/16/16,9/8/16,2/1/17,6,169,169,,,NA,NA,3,2/23/17,3,0,,,3,0,1,1,,
20945,CC005,"94,95x96",0,1,0,8/16/16,8/16/16,9/8/16,2/7/17,7,175,175,,,NA,NA,2,3/2/17,2,0,,,2,0,1,1,,
20945,CC005,"94,95x96",0,1,0,8/16/16,8/16/16,9/8/16,3/4/17,8,200,200,,,NA,NA,2,3/31/17,2,0,,,2,0,1,1,,
20945,CC005,"94,95x96",0,1,0,8/16/16,8/16/16,9/8/16,3/29/17,9,225,225,,,NA,NA,4,4/20/17,2,2,,,4,0,1,1,retired breeders 5/12/17,
20945,CC005,"97,98x99",0,1,0,9/1/16,9/1/16,10/5/16,11/14/16,1,74,74,,,74,NA,4,12/29/16,1,3,0,,4,0,1,1,,
20945,CC005,"97,98x99",0,1,0,9/1/16,9/1/16,10/5/16,12/8/16,2,98,98,,,NA,NA,4,NA,0,0,4,missing,0,4,1,0,missing,
20945,CC005,"97,98x99",0,1,0,9/1/16,9/1/16,10/5/16,1/6/17,3,127,127,,,NA,NA,3,1/26/17,2,1,0,,3,0,1,1,,
20945,CC005,"97,98x99",0,1,0,9/1/16,9/1/16,10/5/16,1/16/17,4,137,137,,,NA,NA,7,2/9/17,1,4,2,2 missing,5,2,1,1,2 missing,
20945,CC005,"97,98x99",0,1,0,9/1/16,9/1/16,10/5/16,2/1/17,5,153,153,,,NA,NA,1,2/23/17,1,0,0,,1,0,1,1,,
20945,CC005,"97,98x99",0,1,0,9/1/16,9/1/16,10/5/16,2/14/17,6,166,166,,,NA,NA,6,3/9/17,4,2,0,,6,0,1,1,,
20945,CC005,"97,98x99",0,1,0,9/1/16,9/1/16,10/5/16,2/23/17,7,175,175,,,NA,NA,10,3/16/17,1,0,9,9 missing; runts,1,9,1,1,9 missing; runts,
20945,CC005,"97,98x99",0,1,0,9/1/16,9/1/16,10/5/16,3/12/17,8,192,192,,,NA,NA,5,4/7/17,4,1,0,,5,0,1,1,,
20945,CC005,"97,98x99",0,1,0,9/1/16,9/1/16,10/5/16,4/10/17,9,221,221,,,NA,NA,2,NA,0,0,2,2 missing; retired breeders 6/8/17,0,2,1,0,2 missing; retired breeders 6/8/17,
22869,CC006,"216,217x218",0,1,0,5/14/16,5/14/16,6/7/16,8/11/16,1,89,89,,,89,NA,3,8/30/16,0,2,1,,2,1,1,1,,
22869,CC006,"216,217x218",0,1,0,5/14/16,5/14/16,6/7/16,8/21/16,2,99,99,,,NA,NA,3,9/12/16,0,3,0,,3,0,1,1,,
22869,CC006,"216,217x218",0,1,0,5/14/16,5/14/16,6/7/16,8/31/16,3,109,109,,,NA,NA,5,9/19/16,2,2,1,,4,1,1,1,,
22869,CC006,"216,217x218",0,1,0,5/14/16,5/14/16,6/7/16,9/13/16,4,122,122,,,NA,NA,3,10/3/16,2,1,0,,3,0,1,1,,
22869,CC006,"216,217x218",0,1,0,5/14/16,5/14/16,6/7/16,9/26/16,5,135,135,,,NA,NA,5,10/17/16,2,3,0,,5,0,1,1,,
22869,CC006,"216,217x218",0,1,0,5/14/16,5/14/16,6/7/16,10/20/16,6,159,159,,,NA,NA,1,11/8/16,0,1,0,,1,0,1,1,,
22869,CC006,"216,217x218",0,1,0,5/14/16,5/14/16,6/7/16,10/24/16,7,163,163,,,NA,NA,6,11/14/16,1,5,0,,6,0,1,1,,
22869,CC006,"216,217x218",0,1,0,5/14/16,5/14/16,6/7/16,11/27/16,8,197,197,,,NA,NA,1,12/20/16,1,0,0,,1,0,1,1,,
22869,CC006,"216,217x218",0,1,0,5/14/16,5/14/16,6/7/16,12/23/16,9,223,223,,,NA,NA,3,NA,0,0,3,218 pulled 12/20/16,0,3,1,0,218 pulled 12/20/16,
22869,CC006,"219,220x221",0,1,0,6/4/16,6/4/16,7/6/16,8/26/16,1,83,83,,,83,NA,2,9/12/16,2,0,0,,2,0,1,1,,
22869,CC006,"219,220x221",0,1,0,6/4/16,6/4/16,7/6/16,9/9/16,2,97,97,,,NA,NA,4,10/3/16,2,2,0,,4,0,1,1,,
22869,CC006,"219,220x221",0,1,0,6/4/16,6/4/16,7/6/16,9/16/16,3,104,104,,,NA,NA,5,10/10/16,1,4,0,,5,0,1,1,,
22869,CC006,"219,220x221",0,1,0,6/4/16,6/4/16,7/6/16,10/8/16,4,126,126,,,NA,NA,8,10/31/16,3,4,1,,7,1,1,1,,
22869,CC006,"219,220x221",0,1,0,6/4/16,6/4/16,7/6/16,10/24/16,5,142,142,,,NA,NA,2,NA,0,0,2,missing,0,2,1,0,missing,
22869,CC006,"219,220x221",0,1,0,6/4/16,6/4/16,7/6/16,11/6/16,6,155,155,,,NA,NA,4,11/29/16,2,2,0,,4,0,1,1,,
22869,CC006,"219,220x221",0,1,0,6/4/16,6/4/16,7/6/16,11/18/16,7,167,167,,,NA,NA,5,12/6/16,5,0,0,,5,0,1,1,,
22869,CC006,"219,220x221",0,1,0,6/4/16,6/4/16,7/6/16,12/21/16,8,200,200,,,NA,NA,2,NA,0,0,2,,0,2,1,0,,
22869,CC006,"222,223x224",0,1,0,8/2/16,8/2/16,9/7/16,10/26/16,1,85,85,,,85,NA,2,11/22/16,2,0,0,,2,0,1,1,,
22869,CC006,"222,223x224",0,1,0,8/2/16,8/2/16,9/7/16,11/12/16,2,102,102,,,NA,NA,3,12/5/16,2,1,0,,3,0,1,1,,
22869,CC006,"222,223x224",0,1,0,8/2/16,8/2/16,9/7/16,11/16/16,3,106,106,,,NA,NA,4,12/6/16,1,2,1,missing,3,1,1,1,missing,
22869,CC006,"222,223x224",0,1,0,8/2/16,8/2/16,9/7/16,12/6/16,4,126,126,,,NA,NA,7,1/10/17,4,3,0,222 missing 12/5/16; 223 FD 2/6/17,7,0,1,1,222 missing 12/5/16; 223 FD 2/6/17,
22869,CC006,"225,226x227",0,1,0,8/16/16,8/16/16,9/12/16,10/22/16,1,67,67,,,67,NA,7,11/14/16,4,3,0,,7,0,1,1,,
22869,CC006,"225,226x227",0,1,0,8/16/16,8/16/16,9/12/16,11/14/16,2,90,90,11/18/16,,NA,NA,16,12/6/16,8,8,0,,16,0,2,2,,
22869,CC006,"225,226x227",0,1,0,8/16/16,8/16/16,9/12/16,1/1/17,3,138,138,1/2/17,,NA,NA,12,1/24/17,5,6,1,,11,1,2,2,,
22869,CC006,"225,226x227",0,1,0,8/16/16,8/16/16,9/12/16,1/30/17,4,167,167,,,NA,NA,3,NA,0,0,3,"2 FD, 1 missing",0,3,1,0,"2 FD, 1 missing",
22869,CC006,"225,226x227",0,1,0,8/16/16,8/16/16,9/12/16,3/5/17,5,201,201,,,NA,NA,5,NA,0,0,5,3 FD; 227 FD 2/21/17,0,5,1,0,3 FD; 227 FD 2/21/17,
22869,CC006,"228,229x230",0,1,0,8/23/16,8/23/16,9/12/16,11/1/16,1,70,70,,,70,NA,5,11/22/16,3,2,0,,5,0,1,1,,
22869,CC006,"228,229x230",0,1,0,8/23/16,8/23/16,9/12/16,11/9/16,2,78,78,,,NA,NA,4,11/29/16,2,2,0,,4,0,1,1,,
22869,CC006,"228,229x230",0,1,0,8/23/16,8/23/16,9/12/16,12/3/16,3,102,102,,,NA,NA,7,12/7/16,1,5,1,,6,1,1,1,,
22869,CC006,"228,229x230",0,1,0,8/23/16,8/23/16,9/12/16,12/29/16,4,128,128,,,NA,NA,5,1/16/17,2,3,0,,5,0,1,1,,
22869,CC006,"228,229x230",0,1,0,8/23/16,8/23/16,9/12/16,1/24/17,5,154,154,,,NA,NA,5,2/21/17,4,1,0,228 pulled 2/20/17,5,0,1,1,228 pulled 2/20/17,
22869,CC006,"231,232x233",0,1,0,9/6/16,9/6/16,10/3/16,12/18/16,1,103,103,,,103,NA,4,1/10/17,1,3,0,,4,0,1,1,,
22869,CC006,"231,232x233",0,1,0,9/6/16,9/6/16,10/3/16,1/12/17,2,128,128,,,NA,NA,5,1/30/17,0,4,1,1 missing,4,1,1,1,1 missing,
22869,CC006,"234,235x236",0,1,0,9/27/16,9/27/16,10/17/16,1/6/17,1,101,101,,,101,NA,1,1/24/17,1,0,0,,1,0,1,1,,
22869,CC006,"234,235x236",0,1,0,9/27/16,9/27/16,10/17/16,2/19/17,2,145,145,2/27/17,,NA,NA,6,3/17/17,0,3,3,1 FD; 1 missing,3,3,2,2,1 FD; 1 missing,
22869,CC006,"234,235x236",0,1,0,9/27/16,9/27/16,10/17/16,4/25/17,3,210,210,,,NA,NA,6,5/16/17,4,1,1,1 BD,5,1,1,1,1 BD,
22869,CC006,"234,235x236",0,1,0,9/27/16,9/27/16,10/17/16,5/20/17,4,235,235,,,NA,NA,6,NA,0,0,6,1 FD; 234 FD 4/18/17; 236 ulled 5/1/17,0,6,1,0,1 FD; 234 FD 4/18/17; 236 ulled 5/1/17,
22869,CC006,"237,238x239",0,1,0,9/27/16,9/27/16,10/24/16,12/11/16,1,75,75,,,75,NA,4,1/10/17,3,1,0,,4,0,1,1,,
22869,CC006,"237,238x239",0,1,0,9/27/16,9/27/16,10/24/16,1/13/17,2,108,108,,,NA,NA,5,1/30/17,3,2,0,,5,0,1,1,,
22869,CC006,"237,238x239",0,1,0,9/27/16,9/27/16,10/24/16,2/12/17,3,138,138,,,NA,NA,6,3/6/17,3,1,2,2 missing,4,2,1,1,2 missing,
22869,CC006,"237,238x239",0,1,0,9/27/16,9/27/16,10/24/16,2/27/17,4,153,153,,,NA,NA,1,NA,0,0,1,missing,0,1,1,0,missing,
22869,CC006,"237,238x239",0,1,0,9/27/16,9/27/16,10/24/16,3/12/17,5,166,166,,,NA,NA,4,4/10/17,2,1,1,1 missing,3,1,1,1,1 missing,
22869,CC006,"237,238x239",0,1,0,9/27/16,9/27/16,10/24/16,3/20/17,6,174,174,,,NA,NA,3,NA,0,0,3,missing,0,3,1,0,missing,
22869,CC006,"237,238x239",0,1,0,9/27/16,9/27/16,10/24/16,4/14/17,7,199,199,,,NA,NA,4,5/8/17,1,3,0,,4,0,1,1,,
22869,CC006,"237,238x239",0,1,0,9/27/16,9/27/16,10/24/16,5/5/17,8,220,220,,,NA,NA,9,NA,0,0,9,239 pulled 5/1/17; 237 FD 3/20/17,0,9,1,0,239 pulled 5/1/17; 237 FD 3/20/17,
22869,CC006,"240,241x242",0,1,0,10/11/06,10/11/06,10/31/16,12/19/16,1,3722,3722,,,3722,NA,5,1/10/17,3,2,0,,5,0,1,1,,
22869,CC006,"240,241x242",0,1,0,10/11/06,10/11/06,10/31/16,1/14/17,2,3748,3748,1/17/17,,NA,NA,16,1/30/17,5,9,2,,14,2,2,2,,
22869,CC006,"240,241x242",0,1,0,10/11/06,10/11/06,10/31/16,2/15/17,3,3780,3780,,,NA,NA,5,3/6/17,2,3,0,,5,0,1,1,,
22869,CC006,"240,241x242",0,1,0,10/11/06,10/11/06,10/31/16,2/26/17,4,3791,3791,,,NA,NA,4,3/21/17,1,3,0,,4,0,1,1,,
22869,CC006,"240,241x242",0,1,0,10/11/06,10/11/06,10/31/16,3/11/17,5,3804,3804,,,NA,NA,6,NA,0,0,6,3 FD; 3 missing,0,6,1,0,3 FD; 3 missing,
22869,CC006,"240,241x242",0,1,0,10/11/06,10/11/06,10/31/16,3/23/17,6,3816,3816,,,NA,NA,2,4/10/17,2,0,0,,2,0,1,1,,
22869,CC006,"240,241x242",0,1,0,10/11/06,10/11/06,10/31/16,4/27/17,7,3851,3851,5/2/17,,NA,NA,7,5/22/17,6,1,0,242 pulled 6/5/17,7,0,2,2,242 pulled 6/5/17,
22869,CC006,"243,244x245",0,1,0,10/25/16,10/25/16,11/14/16,12/28/16,1,64,64,,,64,NA,2,1/16/17,1,1,0,,2,0,1,1,,
22869,CC006,"243,244x245",0,1,0,10/25/16,10/25/16,11/14/16,1/2/17,2,69,69,,,NA,NA,6,1/24/17,3,0,3,missing,3,3,1,1,missing,
22869,CC006,"243,244x245",0,1,0,10/25/16,10/25/16,11/14/16,1/19/17,3,86,86,,,NA,NA,5,1/30/17,4,1,0,,5,0,1,1,,
22869,CC006,"243,244x245",0,1,0,10/25/16,10/25/16,11/14/16,1/24/17,4,91,91,,,NA,NA,6,2/21/17,4,2,0,,6,0,1,1,,
22869,CC006,"243,244x245",0,1,0,10/25/16,10/25/16,11/14/16,3/6/17,5,132,132,,,NA,NA,8,3/27/17,5,1,2,2 missing,6,2,1,1,2 missing,
22869,CC006,"243,244x245",0,1,0,10/25/16,10/25/16,11/14/16,3/9/17,6,135,135,,,NA,NA,4,NA,0,0,4,missing,0,4,1,0,missing,
22869,CC006,"243,244x245",0,1,0,10/25/16,10/25/16,11/14/16,4/4/17,7,161,161,,,NA,NA,7,4/28/17,4,3,0,,7,0,1,1,,
22869,CC006,"243,244x245",0,1,0,10/25/16,10/25/16,11/14/16,4/29/17,8,186,186,,,NA,NA,8,5/22/17,4,4,0,,8,0,1,1,,
22869,CC006,"243,244x245",0,1,0,10/25/16,10/25/16,11/14/16,5/25/17,9,212,212,,,NA,NA,3,NA,0,0,3,,0,3,1,0,,
22869,CC006,"243,244x245",0,1,0,10/25/16,10/25/16,11/14/16,5/27/17,10,214,214,,,NA,NA,4,NA,0,0,4,male pulled 6/5/17,0,4,1,0,male pulled 6/5/17,
22869,CC006,"243,244x245",0,1,0,5/2/17,5/2/17,6/19/17,7/10/17,11,69,69,,,NA,NA,4,7/31/17,2,2,,,4,0,1,1,291 FD 10/9/17; 245 FD 1/8/17,
22869,CC006,"243,244x245",0,1,0,5/2/17,5/2/17,6/19/17,7/31/17,12,90,90,,,NA,NA,13,8/21/17,5,5,,,10,3,1,1,missing,
22869,CC006,"243,244x245",0,1,0,5/2/17,5/2/17,6/19/17,8/21/17,13,111,111,,,NA,NA,9,NA,0,0,,,0,9,1,0,,
22869,CC006,"243,244x245",0,1,0,5/2/17,5/2/17,6/19/17,9/10/17,14,131,131,9/12/17,,NA,NA,11,10/2/17,2,8,,,10,1,2,2,missing,
22869,CC006,"243,244x245",0,1,0,5/2/17,5/2/17,6/19/17,10/2/17,15,153,153,,,NA,NA,5,10/23/17,2,1,,,3,2,1,1,,
22869,CC006,"243,244x245",0,1,0,5/2/17,5/2/17,6/19/17,10/23/17,16,174,174,,,NA,NA,4,11/13/17,0,1,,,1,3,1,1,2 born dead,
22869,CC006,"243,244x245",0,1,0,5/2/17,5/2/17,6/19/17,11/13/17,17,195,195,,,NA,NA,4,12/4/17,2,2,,,4,0,1,1,,
22869,CC006,"243,244x245",0,1,0,5/2/17,5/2/17,6/19/17,12/24/17,18,236,236,,,NA,NA,6,1/15/18,1,3,,,4,2,1,1,2 FD,
22869,CC006,"246,247x248",0,1,0,11/15/16,11/15/16,12/6/16,1/21/17,1,67,67,,,67,NA,2,2/21/17,2,0,0,,2,0,1,1,,
22869,CC006,"246,247x248",0,1,0,11/15/16,11/15/16,12/6/16,2/11/17,2,88,88,,,NA,NA,6,3/6/17,4,2,0,246 FD 4/18/17,6,0,1,1,246 FD 4/18/17,
22869,CC006,"249,250x251",0,1,0,12/13/16,12/13/16,1/10/17,2/18/17,1,67,67,,,67,NA,4,3/6/17,2,1,1,,3,1,1,1,,
22869,CC006,"249,250x251",0,1,0,12/13/16,12/13/16,1/10/17,2/21/17,2,70,70,,,NA,NA,5,3/13/17,2,2,1,missing,4,1,1,1,missing,
22869,CC006,"249,250x251",0,1,0,12/13/16,12/13/16,1/10/17,3/12/17,3,89,89,,,NA,NA,1,NA,0,0,1,missing,0,1,1,0,missing,
22869,CC006,"249,250x251",0,1,0,12/13/16,12/13/16,1/10/17,3/18/17,4,95,95,,,NA,NA,4,4/10/17,1,3,0,,4,0,1,1,,
22869,CC006,"249,250x251",0,1,0,12/13/16,12/13/16,1/10/17,4/6/17,5,114,114,,,NA,NA,4,4/28/17,0,4,0,,4,0,1,1,,
22869,CC006,"249,250x251",0,1,0,12/13/16,12/13/16,1/10/17,4/21/17,6,129,129,,,NA,NA,4,NA,0,0,4,missing,0,4,1,0,missing,
22869,CC006,"249,250x251",0,1,0,12/13/16,12/13/16,1/10/17,4/28/17,7,136,136,,,NA,NA,7,5/22/17,1,1,5,missing,2,5,1,1,missing,
22869,CC006,"249,250x251",0,1,0,12/13/16,12/13/16,1/10/17,5/22/17,8,160,160,,,NA,NA,5,NA,0,0,5,missing; females FD 5/16/17 and 6/6/17,0,5,1,0,missing; females FD 5/16/17 and 6/6/17,
22869,CC006,"252,253x254",0,1,0,1/24/17,1/24/17,2/21/17,4/9/17,1,75,75,,,75,NA,2,5/1/17,0,2,0,,2,0,1,1,,
22869,CC006,"252,253x254",0,1,0,1/24/17,1/24/17,2/21/17,4/29/17,2,95,95,,,NA,NA,3,5/22/17,1,1,1,,2,1,1,1,,
22869,CC006,"252,253x254",0,1,0,1/24/17,1/24/17,2/21/17,5/27/17,3,123,123,,,NA,NA,7,6/19/17,4,2,1,missing; 252 FD 4/4/17; 253 FD 7/17/17,6,1,1,1,missing; 252 FD 4/4/17; 253 FD 7/17/17,
22869,CC006,"255,256x257",0,1,0,1/24/17,1/24/17,2/21/17,4/7/17,1,73,73,,,73,NA,7,5/1/17,4,3,,,7,0,1,1,female found dead 7/17/17,
22869,CC006,"255,256x257",0,1,0,1/24/17,1/24/17,2/21/17,4/27/17,2,93,93,,,NA,NA,3,5/22/17,2,1,,,3,0,1,1,female found dead 7/17/17,
22869,CC006,"255,256x257",0,1,0,1/24/17,1/24/17,2/21/17,5/20/17,3,116,116,,,NA,NA,3,6/19/17,0,3,,,3,0,1,1,female found dead 7/17/17,
22869,CC006,"255,256x257",0,1,0,1/24/17,1/24/17,2/21/17,6/11/17,4,138,138,,,NA,NA,3,NA,0,0,,,0,3,1,0,missing; female found dead 7/17/17,
22869,CC006,"255,256x257",0,1,0,1/24/17,1/24/17,2/21/17,6/13/17,5,140,140,,,NA,NA,1,7/7/17,0,1,,,1,0,1,1,female found dead 7/17/17,
22869,CC006,"255,256x257",0,1,0,1/24/17,1/24/17,2/21/17,7/2/17,6,159,159,,,NA,NA,2,7/31/17,0,2,,,2,0,1,1,tails injured; female found dead 7/17/17,
22869,CC006,"255,256x257",0,1,0,1/24/17,1/24/17,2/21/17,7/6/17,7,163,163,,,NA,NA,1,7/31/17,1,0,,,1,0,1,1,tails injured; female found dead 7/17/17,
22869,CC006,"258,259x60",0,1,0,2/11/17,2/11/17,3/6/17,5/2/17,1,80,80,,,80,NA,3,5/22/17,3,0,,,3,0,1,1,,
22869,CC006,"258,259x60",0,1,0,2/11/17,2/11/17,3/6/17,5/16/17,2,94,94,,,NA,NA,6,5/31/17,0,0,,,0,6,1,0,missing,
22869,CC006,"258,259x60",0,1,0,2/11/17,2/11/17,3/6/17,5/22/17,3,100,100,,,NA,NA,4,6/12/17,2,2,,,4,0,1,1,,
22869,CC006,"258,259x60",0,1,0,2/11/17,2/11/17,3/6/17,6/9/17,4,118,118,,,NA,NA,3,6/26/17,1,2,,,3,0,1,1,,
22869,CC006,"258,259x60",0,1,0,2/11/17,2/11/17,3/6/17,6/15/17,5,124,124,,,NA,NA,2,7/3/17,2,0,,,2,0,1,1,258 FD 8/22/17,
22869,CC006,"261,262x263",0,1,0,2/11/17,2/11/17,3/6/17,4/19/17,1,67,67,,,67,NA,2,5/16/17,0,2,,,2,0,1,1,,
22869,CC006,"261,262x263",0,1,0,2/11/17,2/11/17,3/6/17,5/11/17,2,89,89,,,NA,NA,8,5/31/17,5,3,,,8,0,1,1,,
22869,CC006,"261,262x263",0,1,0,2/11/17,2/11/17,3/6/17,6/8/17,3,117,117,,,NA,NA,2,6/26/17,0,2,,,2,0,1,1,,
22869,CC006,"261,262x263",0,1,0,2/11/17,2/11/17,3/6/17,8/4/17,4,174,174,,,NA,NA,5,8/28/17,3,1,,,4,1,1,1,,
22869,CC006,"261,262x263",0,1,0,2/11/17,2/11/17,3/6/17,8/28/17,5,198,198,,,NA,NA,3,NA,0,0,,,0,3,1,0,261 FD 8/28/17,
22869,CC006,"264,265x266",0,1,0,2/21/17,2/21/17,3/13/17,5/9/17,1,77,77,,,77,NA,6,5/31/17,2,4,,,6,0,1,1,,
22869,CC006,"264,265x266",0,1,0,2/21/17,2/21/17,3/13/17,5/14/17,2,82,82,,,NA,NA,4,6/5/17,1,3,,,4,0,1,1,,
22869,CC006,"264,265x266",0,1,0,2/21/17,2/21/17,3/13/17,6/3/17,3,102,102,6/6/17,,NA,NA,10,6/26/17,2,5,,,7,3,2,2,2 FD; 1 BD,
22869,CC006,"264,265x266",0,1,0,2/21/17,2/21/17,3/13/17,6/30/17,4,129,129,,,NA,NA,5,7/31/17,2,2,,,4,1,1,1,missing,
22869,CC006,"264,265x266",0,1,0,2/21/17,2/21/17,3/13/17,8/5/17,5,165,165,,,NA,NA,8,8/28/17,5,2,,,7,1,1,1,,
22869,CC006,"264,265x266",0,1,0,2/21/17,2/21/17,3/13/17,9/19/17,6,210,210,,,NA,NA,7,NA,0,0,,,0,7,1,0,missing,
22869,CC006,"267,268x269",0,1,0,3/7/17,3/7/17,4/10/17,5/14/17,1,68,68,,,68,NA,11,6/5/17,5,5,,,10,1,1,1,1 missing,
22869,CC006,"267,268x269",0,1,0,3/7/17,3/7/17,4/10/17,6/6/17,2,91,91,,,NA,NA,3,6/20/17,3,0,,,3,0,1,1,,
22869,CC006,"267,268x269",0,1,0,3/7/17,3/7/17,4/10/17,7/28/17,3,143,143,,,NA,NA,4,8/21/17,1,2,,,3,1,1,1,1 missing,
22869,CC006,"267,268x269",0,1,0,3/7/17,3/7/17,4/10/17,8/21/17,4,167,167,,,NA,NA,9,NA,0,0,,,0,9,1,0,5 missing,
22869,CC006,"267,268x269",0,1,0,3/7/17,3/7/17,4/10/17,9/10/17,5,187,187,,,NA,NA,1,NA,0,0,,,0,1,1,0,1 FD; 267 FD 7/24/17,
22869,CC006,"270,271x272",0,1,0,4/7/17,4/7/17,5/1/17,6/9/17,1,63,63,,,63,NA,4,6/26/17,2,2,,,4,0,1,1,,
22869,CC006,"270,271x272",0,1,0,4/7/17,4/7/17,5/1/17,7/1/17,2,85,85,,,NA,NA,8,7/31/17,3,5,,,8,0,1,1,,
22869,CC006,"270,271x272",0,1,0,4/7/17,4/7/17,5/1/17,7/27/17,3,111,111,,,NA,NA,6,8/14/17,2,4,,,6,0,1,1,,
22869,CC006,"270,271x272",0,1,0,4/7/17,4/7/17,5/1/17,8/20/17,4,135,135,,,NA,NA,5,9/29/17,1,2,,,3,2,1,1,"1 BD, 1 missing",
22869,CC006,"270,271x272",0,1,0,4/7/17,4/7/17,5/1/17,8/24/17,5,139,139,,,NA,NA,1,NA,0,0,,,0,1,1,0,,
22869,CC006,"270,271x272",0,1,0,4/7/17,4/7/17,5/1/17,9/12/17,6,158,158,,,NA,NA,5,10/2/17,0,1,,,1,4,1,1,missing ,
22869,CC006,"270,271x272",0,1,0,4/7/17,4/7/17,5/1/17,10/3/17,7,179,179,,,NA,NA,6,10/30/17,3,2,,,5,1,1,1,missing,
22869,CC006,"270,271x272",0,1,0,4/7/17,4/7/17,5/1/17,10/28/17,8,204,204,,,NA,NA,5,11/27/17,1,4,,,5,0,1,1,,
22869,CC006,"273,274x275",0,1,0,4/7/17,4/7/17,5/1/17,6/14/17,1,68,68,,,68,NA,2,7/3/17,0,2,,,2,0,1,1,,
22869,CC006,"273,274x275",0,1,0,4/7/17,4/7/17,5/1/17,7/7/17,2,91,91,,,NA,NA,10,7/31/17,4,6,,,10,0,1,1,,
22869,CC006,"273,274x275",0,1,0,4/7/17,4/7/17,5/1/17,8/22/17,3,137,137,,,NA,NA,7,9/29/17,1,6,,,7,0,1,1,,
22869,CC006,"273,274x275",0,1,0,4/7/17,4/7/17,5/1/17,9/22/17,4,168,168,,,NA,NA,2,10/16/17,2,0,,,2,0,1,1,,
22869,CC006,"273,274x275",0,1,0,4/7/17,4/7/17,5/1/17,10/15/17,5,191,191,,,NA,NA,4,11/6/17,0,4,,,4,0,1,1,273 FD 9/5/17,
22869,CC006,"276,277x278",0,1,0,4/4/17,4/4/17,5/16/17,6/29/17,1,86,86,,,86,NA,5,7/18/17,3,2,,,5,0,1,1,females FD 9/19/17,
22869,CC006,"276,277x278",0,1,0,4/4/17,4/4/17,5/16/17,7/21/17,2,108,108,,,NA,NA,4,8/14/17,1,2,,,3,1,1,1,,
22869,CC006,"276,277x278",0,1,0,6/29/17,6/29/17,7/18/17,8/30/17,3,62,62,,,NA,NA,4,10/2/17,3,2,,,5,-1,1,1,,
22869,CC006,"276,277x278",0,1,0,6/29/17,6/29/17,7/18/17,9/22/17,4,85,85,,,NA,NA,6,10/26/17,5,1,,,6,0,1,1,,
22869,CC006,"276,277x278",0,1,0,6/29/17,6/29/17,7/18/17,10/14/17,5,107,107,,,NA,NA,6,11/6/17,3,3,,,6,0,1,1,,
22869,CC006,"276,277x278",0,1,0,6/29/17,6/29/17,7/18/17,10/27/17,6,120,120,,,NA,NA,1,NA,0,0,,,0,1,1,0,,
22869,CC006,"276,277x278",0,1,0,6/29/17,6/29/17,7/18/17,11/17/17,7,141,141,,,NA,NA,4,12/11/17,3,1,,,4,0,1,1,,
22869,CC006,"276,277x278",0,1,0,6/29/17,6/29/17,7/18/17,11/20/17,8,144,144,,,NA,NA,1,NA,0,0,,,0,1,1,0,,
22869,CC006,"276,277x278",0,1,0,6/29/17,6/29/17,7/18/17,12/20/17,9,174,174,,,NA,NA,2,1/22/18,2,0,,,2,0,1,1,,
22869,CC006,"276,277x278",0,1,0,6/29/17,6/29/17,7/18/17,1/23/18,10,208,208,,,NA,NA,2,NA,NA,NA,,,NA,0,1,0,,
22869,CC006,"279,280x281",0,1,0,4/4/17,4/4/17,5/16/17,7/18/17,1,105,105,,,105,NA,3,8/7/17,1,2,,,3,0,1,1,,
22869,CC006,"279,280x281",0,1,0,4/4/17,4/4/17,5/16/17,9/10/17,2,159,159,,,NA,NA,1,NA,0,0,,,0,1,1,0,missing; 281 FD 11/6/17,
22869,CC006,"282,283x284",0,1,0,4/27/17,4/27/17,5/22/17,6/30/17,1,64,64,,,64,NA,5,7/18/17,2,3,,,5,0,1,1,,
22869,CC006,"282,283x284",0,1,0,4/27/17,4/27/17,5/22/17,7/7/17,2,71,71,,,NA,NA,2,7/31/17,0,2,,,2,0,1,1,,
22869,CC006,"282,283x284",0,1,0,4/27/17,4/27/17,5/22/17,7/22/17,3,86,86,7/27/17,,NA,NA,13,8/14/17,6,7,,,13,0,2,2,,
22869,CC006,"282,283x284",0,1,0,4/27/17,4/27/17,5/22/17,8/19/17,4,114,114,,,NA,NA,1,NA,0,0,,,0,1,1,0,missing ,
22869,CC006,"282,283x284",0,1,0,4/27/17,4/27/17,5/22/17,9/12/17,5,138,138,,,NA,NA,6,10/2/17,3,2,,,5,1,1,1,missing,
22869,CC006,"282,283x284",0,1,0,4/27/17,4/27/17,5/22/17,10/6/17,6,162,162,,,NA,NA,5,10/27/17,3,2,,,5,0,1,1,,
22869,CC006,"282,283x284",0,1,0,4/27/17,4/27/17,5/22/17,10/27/17,7,183,183,,,NA,NA,2,11/13/17,0,0,,,0,2,1,0,missing,
22869,CC006,"285,286x287",0,1,0,5/14/17,5/14/17,6/5/17,7/22/17,1,69,69,,,69,NA,5,8/14/17,1,4,,,5,0,1,1,,
22869,CC006,"285,286x287",0,1,0,5/14/17,5/14/17,6/5/17,8/13/17,2,91,91,8/17/17,,NA,NA,6,9/5/17,4,2,,,6,0,2,2,,
22869,CC006,"285,286x287",0,1,0,5/14/17,5/14/17,6/5/17,8/30/17,3,108,108,,,NA,NA,NA,NA,NA,NA,,,NA,0,1,0,,
22869,CC006,"285,286x287",0,1,0,5/14/17,5/14/17,6/5/17,9/7/17,4,116,116,,,NA,NA,9,10/2/17,5,4,,,9,0,1,1,,
22869,CC006,"285,286x287",0,1,0,5/14/17,5/14/17,6/5/17,10/1/17,5,140,140,,,NA,NA,6,10/12/17,5,1,,,6,0,1,1,,
22869,CC006,"285,286x287",0,1,0,5/14/17,5/14/17,6/5/17,11/4/17,6,174,174,,,NA,NA,12,11/27/17,4,8,,,12,0,1,1,,
22869,CC006,"285,286x287",0,1,0,5/14/17,5/14/17,6/5/17,11/30/17,7,200,200,,,NA,NA,8,NA,0,0,,,0,8,1,0,,
22869,CC006,"288,289x290",0,1,0,5/14/17,5/14/17,6/5/17,7/26/17,1,73,73,,,73,NA,5,8/14/17,2,3,,,5,0,1,1,,
22869,CC006,"288,289x290",0,1,0,5/14/17,5/14/17,6/5/17,8/4/17,2,82,82,,,NA,NA,1,8/25/17,1,0,,,1,0,1,1,,
22869,CC006,"288,289x290",0,1,0,5/14/17,5/14/17,6/5/17,8/17/17,3,95,95,,,NA,NA,7,9/5/17,5,2,,,7,0,1,1,,
22869,CC006,"288,289x290",0,1,0,5/14/17,5/14/17,6/5/17,8/29/17,4,107,107,,,NA,NA,1,NA,0,0,,,0,1,1,0,found dead,
22869,CC006,"288,289x290",0,1,0,5/14/17,5/14/17,6/5/17,9/10/17,5,119,119,,,NA,NA,8,10/2/17,4,3,,,7,1,1,1,1 missing,
22869,CC006,"288,289x290",0,1,0,5/14/17,5/14/17,6/5/17,9/22/17,6,131,131,,,NA,NA,1,10/16/17,0,1,,,1,0,1,1,,
22869,CC006,"288,289x290",0,1,0,5/14/17,5/14/17,6/5/17,10/2/17,7,141,141,,,NA,NA,9,10/23/17,3,6,,,9,0,1,1,,
22869,CC006,"288,289x290",0,1,0,5/14/17,5/14/17,6/5/17,10/24/17,8,163,163,,,NA,NA,7,11/27/17,4,2,,,6,1,1,1,,
22869,CC006,"288,289x290",0,1,0,5/14/17,5/14/17,6/5/17,11/16/17,9,186,186,,,NA,NA,2,NA,0,0,,,0,2,1,0,missing,
22869,CC006,"288,289x290",0,1,0,5/14/17,5/14/17,6/5/17,12/15/17,10,215,215,,,NA,NA,6,1/8/18,2,4,,,6,0,1,1,,
22869,CC006,"288,289x290",0,1,0,5/14/17,5/14/17,6/5/17,1/9/18,11,240,240,,,NA,NA,3,NA,NA,NA,,,NA,0,1,0,female foundd ead 12/4/17,
22869,CC006,"297,298x299",0,1,0,6/30/17,6/30/17,7/18/17,9/4/17,1,66,66,9/10/17,,66,NA,10,10/2/17,5,5,,,10,0,2,2,,
22869,CC006,"297,298x299",0,1,0,6/30/17,6/30/17,7/18/17,10/3/17,2,95,95,,,NA,NA,1,10/16/17,0,0,,,0,1,1,0,missing,
22869,CC006,"297,298x299",0,1,0,6/30/17,6/30/17,7/18/17,10/25/17,3,117,117,,,NA,NA,2,11/21/17,1,1,,,2,0,1,1,,
22869,CC006,"297,298x299",0,1,0,6/30/17,6/30/17,7/18/17,12/4/17,4,157,157,,,NA,NA,5,NA,0,0,,,0,5,1,0,missing,
22869,CC006,"300,301x302",0,1,0,6/30/17,6/30/17,7/31/17,9/5/17,1,67,67,9/10/17,,67,NA,8,10/2/17,4,4,0,0,8,0,2,2,1 female FD 1/9/18,
22869,CC006,"300,301x302",0,1,0,6/30/17,6/30/17,7/31/17,10/3/17,2,95,95,,,NA,NA,7,10/30/17,3,3,NA,NA,6,1,1,1,1 missing pup; 1 female FD 1/9/18,
22869,CC006,"300,301x302",0,1,0,6/30/17,6/30/17,7/31/17,11/7/17,3,130,130,,,NA,NA,7,11/27/17,4,2,NA,NA,6,1,1,1,1 female FD 1/9/18,
22869,CC006,"300,301x302",0,1,0,6/30/17,6/30/17,7/31/17,11/16/17,4,139,139,,,NA,NA,4,12/9/17,1,1,NA,NA,2,2,1,1,2 born dead; 1 female FD 1/9/18,
22869,CC006,"300,301x302",0,1,0,6/30/17,6/30/17,7/31/17,12/29/17,5,182,182,,,NA,NA,5,1/15/18,NA,NA,NA,NA,NA,NA,1,0,1 female FD 1/9/18; pups missing,
22869,CC006,"303,304x305",0,1,0,8/4/17,8/4/17,8/28/17,10/7/17,1,64,64,,,64,NA,3,10/30/17,2,1,,,3,0,1,1,,
22869,CC006,"303,304x305",0,1,0,8/4/17,8/4/17,8/28/17,10/15/17,2,72,72,,,NA,NA,4,11/6/17,3,1,,,4,0,1,1,,
22869,CC006,"303,304x305",0,1,0,8/4/17,8/4/17,8/28/17,10/30/17,3,87,87,,,NA,NA,4,NA,0,0,,,0,4,1,0,4 born ded,
22869,CC006,"303,304x305",0,1,0,8/4/17,8/4/17,8/28/17,11/8/17,4,96,96,,,NA,NA,6,11/27/17,3,3,,,6,0,1,1,,
22869,CC006,"303,304x305",0,1,0,8/4/17,8/4/17,8/28/17,11/15/17,5,103,103,,,NA,NA,4,11/27/17,0,0,,,0,4,1,0,missing,
22869,CC006,"303,304x305",0,1,0,8/4/17,8/4/17,8/28/17,12/2/17,6,120,120,,,NA,NA,4,12/26/17,1,3,,,4,0,1,1,,
22869,CC006,"303,304x305",0,1,0,8/4/17,8/4/17,8/28/17,12/13/17,7,131,131,,,NA,NA,5,1/8/18,1,4,,,5,0,1,1,,
22869,CC006,"303,304x305",0,1,0,8/4/17,8/4/17,8/28/17,1/10/18,8,159,159,,,NA,NA,7,2/5/18,6,1,,,7,0,1,1,,
22869,CC006,"303,304x305",0,1,0,8/4/17,8/4/17,8/28/17,2/10/18,9,190,190,,,NA,NA,5,2/26/18,0,3,,,3,2,1,1,2 missing; male pulled 2/19/18,
22869,CC006,"306,307x308",0,1,0,8/15/17,8/15/17,9/5/17,10/21/17,1,67,67,,,67,NA,6,11/27/17,1,5,,,6,0,1,1,1 female FD 2/13/18,
22869,CC006,"306,307x308",0,1,0,8/15/17,8/15/17,9/5/17,11/14/17,2,91,91,,,NA,NA,6,12/11/17,3,2,,,5,1,1,1,1 missing; 1 female FD 2/13/18,
22869,CC006,"309,310x311",0,1,0,8/17/17,8/17/17,9/5/17,10/25/17,1,69,69,10/29/17,,69,NA,10,11/25/17,3,7,,,10,0,2,2,,
22869,CC006,"309,310x311",0,1,0,8/17/17,8/17/17,9/5/17,11/25/17,2,100,100,12/9/17,12/15/17,NA,NA,16,1/8/18,4,8,,,12,4,3,3,2 FD; 2 missing,
22869,CC006,"309,310x311",0,1,0,8/17/17,8/17/17,9/5/17,1/3/18,3,139,139,,,NA,NA,2,1/8/18,0,0,,,0,2,1,0,2 missing,
22869,CC006,"309,310x311",0,1,0,8/17/17,8/17/17,9/5/17,1/8/18,4,144,144,,,NA,NA,4,2/5/18,0,3,,,3,1,1,1,1 missing,
22869,CC006,"309,310x311",0,1,0,8/17/17,8/17/17,9/5/17,2/12/18,5,179,179,,,NA,NA,4,3/5/18,0,2,,,2,2,1,1,male pulled 3/5/18,
22869,CC006,"312,313x314",0,1,0,9/12/17,9/12/17,10/2/17,11/13/17,1,62,62,,,62,NA,1,12/4/17,NA,NA,NA,NA,NA,NA,1,0,missing pups; 1 female FD 1/29; 2nd female vaginal prolapse,
22869,CC006,"312,313x314",0,1,0,9/12/17,9/12/17,10/2/17,12/4/17,2,83,83,,,NA,NA,10,12/26/17,6,4,0,0,10,0,1,1,1 female FD 1/29; 2nd female vaginal prolapse,
22869,CC006,"312,313x314",0,1,0,9/12/17,9/12/17,10/2/17,1/1/18,3,111,111,,,NA,NA,8,1/22/18,4,4,0,0,8,0,1,1,1 female FD 1/29; 2nd female vaginal prolapse,
22869,CC006,"312,313x314",0,1,0,9/12/17,9/12/17,10/2/17,1/23/18,4,133,133,,,NA,NA,6,2/19/18,2,4,0,0,6,0,1,1,1 female FD 1/29; 2nd female vaginal prolapse,
22869,CC006,"318,319x320",0,1,0,10/14/17,10/14/17,11/6/17,2/4/18,1,113,113,,,113,NA,3,2/26/18,3,0,,,3,0,1,1,,
22869,CC006,"318,319x320",0,1,0,10/14/17,10/14/17,11/6/17,2/27/18,2,136,136,,,NA,NA,5,3/19/18,1,3,,,4,1,1,1,,
22869,CC006,"318,319x320",0,1,0,10/14/17,10/14/17,11/6/17,3/20/18,3,157,157,,,NA,NA,2,4/16/18,0,2,,,2,0,1,1,318 FD 11/14/18,
22869,CC006,321x322,1,0,0,10/14/17,10/14/17,11/6/17,12/17/17,1,64,64,,,64,NA,6,1/8/18,3,3,,,6,0,1,1,,
22869,CC006,321x322,1,0,0,10/14/17,10/14/17,11/6/17,1/9/18,2,87,87,,,NA,23,3,2/5/18,1,2,,,3,0,1,1,,
22869,CC006,321x322,1,0,0,10/14/17,10/14/17,11/6/17,2/1/18,3,110,110,,,NA,23,5,2/26/18,2,3,,,5,0,1,1,,
22869,CC006,321x322,1,0,0,10/14/17,10/14/17,11/6/17,2/24/18,4,133,133,,,NA,23,6,3/19/18,1,5,,,6,0,1,1,,
22869,CC006,321x322,1,0,0,10/14/17,10/14/17,11/6/17,4/11/18,5,179,179,,,NA,46,5,4/30/18,2,3,,,5,0,1,1,male pulled 5/29/18,
22869,CC006,"323,324x325",0,1,0,10/24/17,10/24/17,11/27/17,1/2/18,1,70,70,,,70,NA,5,1/22/18,2,3,0,,5,0,1,1,,
22869,CC006,"323,324x325",0,1,0,10/24/17,10/24/17,11/27/17,1/25/18,2,93,93,,,NA,NA,5,2/23/18,2,3,0,,5,0,1,1,,
22869,CC006,"323,324x325",0,1,0,10/24/17,10/24/17,11/27/17,2/18/18,3,117,117,,,NA,NA,5,3/12/18,3,2,0,,5,0,1,1,,
22869,CC006,"323,324x325",0,1,0,10/24/17,10/24/17,11/27/17,2/27/18,4,126,126,,,NA,NA,2,3/18/18,0,2,0,,2,0,1,1,,
22869,CC006,"323,324x325",0,1,0,10/24/17,10/24/17,11/27/17,3/15/18,5,142,142,,,NA,NA,2,4/9/18,1,1,0,,2,0,1,1,,
22869,CC006,"323,324x325",0,1,0,10/24/17,10/24/17,11/27/17,5/7/18,6,195,195,,,NA,NA,2,NA,0,0,2,2 BD,0,2,1,0,2 BD,
22869,CC006,"326,327x328",0,1,0,10/24/17,10/24/17,11/27/17,12/26/17,1,63,63,,,63,NA,4,1/15/18,2,1,1,,3,1,1,1,,
22869,CC006,"326,327x328",0,1,0,10/24/17,10/24/17,11/27/17,1/1/18,2,69,69,,,NA,NA,5,1/22/18,1,4,0,,5,0,1,1,,
22869,CC006,"326,327x328",0,1,0,10/24/17,10/24/17,11/27/17,1/15/18,3,83,83,,,NA,NA,8,NA,0,0,8,missing,0,8,1,0,missing,
22869,CC006,"326,327x328",0,1,0,10/24/17,10/24/17,11/27/17,1/25/18,4,93,93,,,NA,NA,8,2/19/18,2,6,0,,8,0,1,1,,
22869,CC006,"326,327x328",0,1,0,10/24/17,10/24/17,11/27/17,2/17/18,5,116,116,,,NA,NA,7,3/12/18,4,3,0,,7,0,1,1,,
22869,CC006,"326,327x328",0,1,0,10/24/17,10/24/17,11/27/17,3/20/18,6,147,147,,,NA,NA,6,4/9/18,3,3,0,,6,0,1,1,,
22869,CC006,"326,327x328",0,1,0,10/24/17,10/24/17,11/27/17,3/24/18,7,151,151,,,NA,NA,3,4/16/18,1,2,0,,3,0,1,1,,
22869,CC006,"326,327x328",0,1,0,10/24/17,10/24/17,11/27/17,4/16/18,8,174,174,,,NA,NA,7,5/14/18,2,3,2,,5,2,1,1,,
22869,CC006,"326,327x328",0,1,0,10/24/17,10/24/17,11/27/17,5/7/18,9,195,195,,,NA,NA,6,5/30/18,3,0,3,3 missing,3,3,1,1,3 missing,
22869,CC006,"332,333x334",0,1,0,12/15/17,12/15/17,1/8/18,2/20/18,1,67,67,,,67,NA,6,3/12/18,0,0,,,0,6,1,0,missing,
22869,CC006,"335,336x337",0,1,0,12/12/17,12/12/17,1/8/18,2/15/18,1,65,65,,,65,NA,5,3/12/18,1,4,0,,5,0,1,1,,
22869,CC006,"335,336x337",0,1,0,12/12/17,12/12/17,1/8/18,3/1/18,2,79,79,,,NA,NA,4,3/26/18,3,0,1,,3,1,1,1,,
22869,CC006,"335,336x337",0,1,0,12/12/17,12/12/17,1/8/18,3/11/18,3,89,89,,,NA,NA,7,4/2/18,3,3,1,1 missing,6,1,1,1,1 missing,
22869,CC006,"335,336x337",0,1,0,12/12/17,12/12/17,1/8/18,4/2/18,4,111,111,4/6/18,,NA,NA,10,4/30/18,6,4,0,,10,0,2,2,,
22869,CC006,"335,336x337",0,1,0,12/12/17,12/12/17,1/8/18,5/4/18,5,143,143,,,NA,NA,6,5/30/18,4,1,1,1 missing,5,1,1,1,1 missing,
22869,CC006,"335,336x337",0,1,0,12/12/17,12/12/17,1/8/18,6/11/18,6,181,181,,,NA,NA,3,NA,0,0,3,missing,0,3,1,0,missing,
22869,CC006,"335,336x337",0,1,0,12/12/17,12/12/17,1/8/18,7/1/18,7,201,201,,,NA,NA,7,7/24/18,3,4,0,335 out 6/18/18,7,0,1,1,335 out 6/18/18,
22869,CC006,"338,339x340",0,1,0,12/5/17,12/5/17,1/22/18,2/16/18,1,73,73,,,73,NA,5,3/12/18,2,3,0,,5,0,1,1,,
22869,CC006,"338,339x340",0,1,0,12/5/17,12/5/17,1/22/18,3/11/18,2,96,96,,,NA,NA,6,4/2/18,5,1,0,,6,0,1,1,,
22869,CC006,"338,339x340",0,1,0,12/5/17,12/5/17,1/22/18,4/5/18,3,121,121,,,NA,NA,7,4/30/18,2,5,0,,7,0,1,1,,
22869,CC006,"338,339x340",0,1,0,12/5/17,12/5/17,1/22/18,4/30/18,4,146,146,,,NA,NA,8,5/30/18,6,1,1,1 missing,7,1,1,1,1 missing,
22869,CC006,"338,339x340",0,1,0,12/5/17,12/5/17,1/22/18,5/26/18,5,172,172,,,NA,NA,8,6/18/18,2,5,1,,7,1,1,1,,
22869,CC006,"341,342x343",0,1,0,12/5/17,12/5/17,1/22/18,2/13/18,1,70,70,,,70,NA,4,3/5/18,2,2,0,,4,0,1,1,,
22869,CC006,"341,342x343",0,1,0,12/5/17,12/5/17,1/22/18,2/18/18,2,75,75,,,NA,NA,3,3/22/18,1,2,0,,3,0,1,1,,
22869,CC006,"341,342x343",0,1,0,12/5/17,12/5/17,1/22/18,3/8/18,3,93,93,,,NA,NA,4,3/26/18,0,4,0,,4,0,1,1,,
22869,CC006,"341,342x343",0,1,0,12/5/17,12/5/17,1/22/18,3/14/18,4,99,99,,,NA,NA,6,4/2/18,1,5,0,,6,0,1,1,,
22869,CC006,"341,342x343",0,1,0,12/5/17,12/5/17,1/22/18,4/20/18,5,136,136,,,NA,NA,6,5/14/18,4,2,0,,6,0,1,1,,
22869,CC006,"341,342x343",0,1,0,12/5/17,12/5/17,1/22/18,4/27/18,6,143,143,,,NA,NA,4,5/30/18,1,3,0,,4,0,1,1,,
22869,CC006,"341,342x343",0,1,0,12/5/17,12/5/17,1/22/18,5/20/18,7,166,166,,,NA,NA,7,6/11/18,6,1,0,,7,0,1,1,,
22869,CC006,"341,342x343",0,1,0,12/5/17,12/5/17,1/22/18,6/15/18,8,192,192,,,NA,NA,5,7/2/18,0,5,0,343 missing 5/30/18,5,0,1,1,343 missing 5/30/18,
22869,CC006,"344,345x346",0,1,0,1/16/18,1/16/18,2/5/18,5/3/18,1,107,107,,,107,NA,2,5/29/18,2,0,0,,2,0,1,1,,
22869,CC006,"344,345x346",0,1,0,1/16/18,1/16/18,2/5/18,5/27/18,2,131,131,,,NA,NA,3,6/11/18,0,3,0,,3,0,1,1,,
22869,CC006,"344,345x346",0,1,0,1/16/18,1/16/18,2/5/18,6/12/18,3,147,147,,,NA,NA,5,7/2/18,1,2,2,,3,2,1,1,,
22869,CC006,"344,345x346",0,1,0,1/16/18,1/16/18,2/5/18,7/7/18,4,172,172,,,NA,NA,8,7/30/18,5,3,0,,8,0,1,1,,
22869,CC006,"344,345x346",0,1,0,1/16/18,1/16/18,2/5/18,8/26/18,5,222,222,,,NA,NA,2,NA,0,0,2,344 FD 8/27/18,0,2,1,0,344 FD 8/27/18,
22869,CC006,"347,348x349",0,1,0,1/23/18,1/23/18,2/19/18,NA,1,NA,NA,,,NA,NA,0,NA,0,0,,,0,0,1,0,nonproductive,
22869,CC006,"350,351x352",0,1,0,1/25/18,1/25/18,2/19/18,4/7/18,1,72,72,,,72,NA,4,4/30/18,0,3,1,,3,1,1,1,,
22869,CC006,"350,351x352",0,1,0,1/25/18,1/25/18,2/19/18,5/22/18,2,117,117,,,NA,NA,6,6/11/18,2,4,0,,6,0,1,1,,
22869,CC006,"350,351x352",0,1,0,1/25/18,1/25/18,2/19/18,6/17/18,3,143,143,,,NA,NA,5,7/16/18,3,2,0,,5,0,1,1,,
22869,CC006,"350,351x352",0,1,0,1/25/18,1/25/18,2/19/18,7/12/18,4,168,168,,,NA,NA,4,7/30/18,3,1,0,,4,0,1,1,,
22869,CC006,"350,351x352",0,1,0,1/25/18,1/25/18,2/19/18,8/4/18,5,191,191,,,NA,NA,5,8/27/18,3,2,0,,5,0,1,1,,
22869,CC006,"350,351x352",0,1,0,1/25/18,1/25/18,2/19/18,9/2/18,6,220,220,,,NA,NA,4,9/24/18,0,4,0,,4,0,1,1,,
22869,CC006,"350,351x352",0,1,0,1/25/18,1/25/18,2/19/18,9/28/18,7,246,246,,,NA,NA,1,NA,0,0,1,350 missing 9/16/18,0,1,1,0,350 missing 9/16/18,
22869,CC006,"353,354x355",0,1,0,2/13/18,2/13/18,3/5/18,NA,1,NA,NA,,,NA,NA,0,NA,0,0,,,0,0,1,0,355 FD 3/12/18,
22869,CC006,"356,357x358",0,1,0,2/17/18,2/17/18,3/12/18,4/28/18,1,70,70,,,70,NA,5,5/30/18,2,2,1,1 missing,4,1,1,1,1 missing,
22869,CC006,"356,357x358",0,1,0,2/17/18,2/17/18,3/12/18,5/16/18,2,88,88,,,NA,NA,7,6/4/18,2,4,1,,6,1,1,1,,
22869,CC006,"356,357x358",0,1,0,2/17/18,2/17/18,3/12/18,5/21/18,3,93,93,,,NA,NA,4,6/11/18,0,3,1,1 missing,3,1,1,1,1 missing,
22869,CC006,"356,357x358",0,1,0,2/17/18,2/17/18,3/12/18,6/9/18,4,112,112,6/13/18,,NA,NA,11,7/2/18,3,8,0,358 FD 6/26/18,11,0,2,2,358 FD 6/26/18,
22869,CC006,"359,360x361",0,1,0,2/17/18,2/17/18,3/12/18,4/26/18,1,68,68,,,68,NA,3,5/14/18,1,2,0,,3,0,1,1,,
22869,CC006,"359,360x361",0,1,0,2/17/18,2/17/18,3/12/18,4/28/18,2,70,70,,,NA,NA,1,5/14/18,0,1,0,,1,0,1,1,,
22869,CC006,"359,360x361",0,1,0,2/17/18,2/17/18,3/12/18,5/17/18,3,89,89,,,NA,NA,5,6/4/18,2,3,0,,5,0,1,1,,
22869,CC006,"359,360x361",0,1,0,2/17/18,2/17/18,3/12/18,6/9/18,4,112,112,,,NA,NA,5,7/2/18,2,2,1,,4,1,1,1,,
22869,CC006,"359,360x361",0,1,0,2/17/18,2/17/18,3/12/18,6/24/18,5,127,127,,,NA,NA,3,7/16/18,1,1,1,,2,1,1,1,,
22869,CC006,"359,360x361",0,1,0,2/17/18,2/17/18,3/12/18,7/2/18,6,135,135,,,NA,NA,4,7/24/18,1,2,1,,3,1,1,1,,
22869,CC006,"359,360x361",0,1,0,2/17/18,2/17/18,3/12/18,7/18/18,7,151,151,,,NA,NA,2,8/6/18,0,2,0,,2,0,1,1,,
22869,CC006,"359,360x361",0,1,0,2/17/18,2/17/18,3/12/18,8/10/18,8,174,174,,,NA,NA,3,9/4/18,0,1,2,359 FD 7/16/18,1,2,1,1,359 FD 7/16/18,
22869,CC006,362x363,1,0,0,2/24/18,2/24/18,3/19/18,5/7/18,1,72,72,,,72,NA,8,5/30/18,4,2,2,2 missing,6,2,1,1,2 missing,
22869,CC006,362x363,1,0,0,2/24/18,2/24/18,3/19/18,5/30/18,2,95,95,,,NA,23,9,6/18/18,4,5,0,,9,0,1,1,,
22869,CC006,362x363,1,0,0,2/24/18,2/24/18,3/19/18,6/28/18,3,124,124,,,NA,29,5,7/16/18,1,4,0,,5,0,1,1,,
22869,CC006,362x363,1,0,0,2/24/18,2/24/18,3/19/18,7/21/18,4,147,147,,,NA,23,6,8/17/18,3,3,0,,6,0,1,1,,
22869,CC006,362x363,1,0,0,2/24/18,2/24/18,3/19/18,8/13/18,5,170,170,,,NA,23,2,9/4/18,2,0,0,,2,0,1,1,,
22869,CC006,362x363,1,0,0,2/24/18,2/24/18,3/19/18,9/5/18,6,193,193,,,NA,23,8,10/1/18,5,3,0,,8,0,1,1,,
22869,CC006,"364,365x366",0,1,0,2/13/18,2/13/18,3/19/18,4/21/18,1,67,67,,,67,NA,2,5/14/18,1,1,0,,2,0,1,1,,
22869,CC006,"364,365x366",0,1,0,2/13/18,2/13/18,3/19/18,4/28/18,2,74,74,,,NA,NA,5,5/20/18,2,3,0,,5,0,1,1,,
22869,CC006,"364,365x366",0,1,0,2/13/18,2/13/18,3/19/18,5/20/18,3,96,96,,,NA,NA,5,6/11/18,0,5,0,,5,0,1,1,,
22869,CC006,"364,365x366",0,1,0,2/13/18,2/13/18,3/19/18,5/28/18,4,104,104,,,NA,NA,1,6/11/18,0,1,0,,1,0,1,1,,
22869,CC006,"364,365x366",0,1,0,2/13/18,2/13/18,3/19/18,6/11/18,5,118,118,,,NA,NA,3,7/2/18,1,2,0,,3,0,1,1,,
22869,CC006,"364,365x366",0,1,0,2/13/18,2/13/18,3/19/18,6/18/18,6,125,125,,,NA,NA,7,7/16/18,2,3,2,1 missing,5,2,1,1,1 missing,
22869,CC006,"364,365x366",0,1,0,2/13/18,2/13/18,3/19/18,7/11/18,7,148,148,,,NA,NA,6,7/30/18,4,2,0,,6,0,1,1,,
22869,CC006,"364,365x366",0,1,0,2/13/18,2/13/18,3/19/18,8/11/18,8,179,179,,,NA,NA,7,9/4/18,0,7,0,,7,0,1,1,,
22869,CC006,"364,365x366",0,1,0,2/13/18,2/13/18,3/19/18,9/5/18,9,204,204,,,NA,NA,2,NA,0,1,1,1 FD,1,1,1,1,1 FD,
22869,CC006,"367,368x369",0,1,0,3/11/18,3/11/18,4/2/18,6/2/18,1,83,83,,,83,NA,4,6/18/18,3,1,0,,4,0,1,1,,
22869,CC006,"367,368x369",0,1,0,3/11/18,3/11/18,4/2/18,6/12/18,2,93,93,,,NA,NA,5,7/2/18,3,2,0,,5,0,1,1,,
22869,CC006,"367,368x369",0,1,0,3/11/18,3/11/18,4/2/18,6/24/18,3,105,105,,,NA,NA,3,7/16/18,1,0,2,1 missing; 1 female AH,1,2,1,1,1 missing; 1 female AH,
22869,CC006,"367,368x369",0,1,0,3/11/18,3/11/18,4/2/18,7/26/18,4,137,137,,,NA,NA,6,NA,0,0,6,6 FD,0,6,1,0,6 FD,
22869,CC006,"367,368x369",0,1,0,3/11/18,3/11/18,4/2/18,8/15/18,5,157,157,,,NA,NA,4,NA,0,0,4,missing,0,4,1,0,missing,
22869,CC006,"367,368x369",0,1,0,3/11/18,3/11/18,4/2/18,8/20/18,6,162,162,,,NA,NA,1,NA,0,0,1,1 BD; 367 FD 8/8/18; 368 FD 8/27/18,0,1,1,0,1 BD; 367 FD 8/8/18; 368 FD 8/27/18,
22869,CC006,"370,371x372",0,1,0,3/11/18,3/11/18,4/2/18,5/25/18,1,75,75,,,75,NA,4,6/11/18,2,2,0,,4,0,1,1,,
22869,CC006,"370,371x372",0,1,0,3/11/18,3/11/18,4/2/18,6/16/18,2,97,97,,,NA,NA,7,7/2/18,3,4,0,,7,0,1,1,,
22869,CC006,"370,371x372",0,1,0,3/11/18,3/11/18,4/2/18,6/19/18,3,100,100,,,NA,NA,5,7/16/18,3,2,0,,5,0,1,1,,
22869,CC006,"370,371x372",0,1,0,3/11/18,3/11/18,4/2/18,7/11/18,4,122,122,7/16/18,,NA,NA,8,7/30/18,5,0,3,missing,5,3,2,2,missing,
22869,CC006,"370,371x372",0,1,0,3/11/18,3/11/18,4/2/18,8/1/18,5,143,143,,,NA,NA,8,8/27/18,3,5,0,,8,0,1,1,,
22869,CC006,"370,371x372",0,1,0,3/11/18,3/11/18,4/2/18,8/26/18,6,168,168,8/30/18,,NA,NA,11,9/17/18,6,5,0,,11,0,2,2,,
22869,CC006,"370,371x372",0,1,0,3/11/18,3/11/18,4/2/18,10/12/18,7,215,215,,,NA,NA,2,11/5/18,0,2,0,370 FD 10/23/18,2,0,1,1,370 FD 10/23/18,
22869,CC006,382x383,1,0,0,6/28/18,6/28/18,7/16/18,NA,1,NA,NA,,,NA,NA,0,NA,0,0,0,nonproductive 10/8/18,0,0,1,0,nonproductive 10/8/18,
29625,CC007,"01,02x03",0,1,0,11/21/17,11/21/17,12/29/17,NA,1,NA,NA,,,NA,NA,0,NA,0,0,0,,0,0,1,0,,
29625,CC007,"07,08x09",0,1,0,11/21/17,11/21/17,12/29/17,NA,1,NA,NA,,,NA,NA,2,NA,0,0,2,2 BD,0,2,1,0,2 BD,
29625,CC007,26x27,1,0,0,6/27/18,6/27/18,7/24/18,NA,1,NA,NA,,,NA,NA,0,NA,0,0,0,27 ill 8/16/18,0,0,1,0,27 ill 8/16/18,
26971,CC008,100x101,1,0,0,7/11/17,7/11/17,8/29/17,NA,1,NA,NA,,,NA,NA,0,NA,0,0,,,0,0,1,0,,
26971,CC008,102x105,1,0,0,7/11/17,7/11/17,8/29/17,10/25/17,1,106,106,,,106,NA,5,11/28/17,2,3,0,,5,0,1,1,,
26971,CC008,102x105,1,0,0,7/11/17,7/11/17,8/29/17,2/18/18,2,222,222,,,NA,116,1,3/6/18,0,0,1,1 missing; male removed 2/15/18 with derm,0,1,1,0,1 missing; male removed 2/15/18 with derm,
26971,CC008,102x118,1,0,0,7/11/17,12/21/17,4/9/18,NA,1,NA,NA,,,NA,NA,0,NA,0,0,0,,0,0,1,0,,
26971,CC008,104x105,1,0,0,7/11/17,7/11/17,8/29/17,9/22/17,1,73,73,,,73,NA,3,10/18/17,1,2,,,3,0,1,1,,
26971,CC008,104x105,1,0,0,7/11/17,7/11/17,8/29/17,10/11/17,2,92,92,,,NA,19,1,NA,0,0,,,0,1,1,0,found dead,
26971,CC008,104x105,1,0,0,7/11/17,7/11/17,8/29/17,11/1/17,3,113,113,,,NA,21,4,11/28/17,1,3,,,4,0,1,1,,
26971,CC008,104x105,1,0,0,7/11/17,7/11/17,8/29/17,11/27/17,4,139,139,,,NA,26,1,NA,0,0,,,0,1,1,0,born dead,
26971,CC008,104x105,1,0,0,7/11/17,7/11/17,8/29/17,12/21/17,5,163,163,,,NA,24,2,1/18/18,0,2,,,2,0,1,1,,
26971,CC008,106x107,1,0,0,9/22/17,9/22/17,10/30/17,NA,1,NA,NA,,,NA,NA,0,NA,0,0,0,107 replaced with 113 5/15/18,0,0,1,0,107 replaced with 113 5/15/18,
26971,CC008,108x109,1,0,0,11/1/17,11/1/17,1/24/18,NA,1,NA,NA,,,NA,NA,0,NA,0,0,,,0,0,1,0,,
26971,CC008,"110,111x112",0,1,0,10/25/17,10/25/17,12/8/17,1/4/18,1,71,71,,,71,NA,3,2/7/18,0,0,,,0,3,1,0,"FD, missing",
26971,CC008,"110,111x112",0,1,0,10/25/17,10/25/17,12/8/17,2/22/18,2,120,120,,,NA,NA,3,3/20/18,1,2,,,3,0,1,1,,
26971,CC008,"110,111x112",0,1,0,10/25/17,10/25/17,12/8/17,2/28/18,3,126,126,,,NA,NA,1,NA,0,0,,,0,1,1,0,,
26971,CC008,"110,111x112",0,1,0,10/25/17,10/25/17,12/8/17,3/20/18,4,146,146,,,NA,NA,4,4/11/18,3,1,,,4,0,1,1,male found sick,
26971,CC008,"110,111x112",0,1,0,10/25/17,10/25/17,12/8/17,4/23/18,5,180,180,,,NA,NA,1,NA,0,0,,,0,1,1,0,missing,
26971,CC008,"110,111x112",0,1,0,10/25/17,10/25/17,12/8/17,5/12/18,6,199,199,,,NA,NA,3,NA,0,0,,,0,3,1,0,1 missing; 2 FD,
26971,CC008,"110,111x112",0,1,0,10/25/17,10/25/17,12/8/17,5/17/18,7,204,204,,,NA,NA,1,NA,0,0,,,0,1,1,0,1 FD,
26971,CC008,119x124,1,0,0,4/15/18,5/1/18,7/18/18,NA,1,NA,NA,,,NA,NA,0,NA,0,0,0,119 FD 7/28/18,0,0,1,0,119 FD 7/28/18,
18856,CC009,"266,267x268",0,1,0,6/21/16,6/21/16,7/11/16,8/15/16,1,55,55,,,55,NA,5,9/6/16,2,2,1,,4,1,1,1,,
18856,CC009,"266,267x268",0,1,0,6/21/16,6/21/16,7/11/16,9/12/16,2,83,83,,,NA,NA,3,10/10/16,1,2,0,,3,0,1,1,,
18856,CC009,"269,270x271",0,1,0,6/7/16,6/7/16,7/5/16,8/31/16,1,85,85,,,85,NA,5,9/26/16,3,2,0,,5,0,1,1,,
18856,CC009,"272,273x274",0,1,0,6/1/16,6/1/16,8/8/16,9/27/16,1,118,118,,,118,NA,4,10/17/16,1,3,0,,4,0,1,1,,
18856,CC009,"272,273x274",0,1,0,6/1/16,6/1/16,8/8/16,11/8/16,2,160,160,,,NA,NA,2,11/29/16,1,1,0,,2,0,1,1,,
18856,CC009,"272,273x274",0,1,0,6/1/16,6/1/16,8/8/16,1/2/17,3,215,215,,,NA,NA,3,1/23/17,0,2,1,share male 277 9/23/16,2,1,1,1,share male 277 9/23/16,
18856,CC009,"275,276x277",0,1,0,6/1/16,6/1/16,8/8/16,10/4/16,1,125,125,,,125,NA,7,10/24/16,3,4,0,,7,0,1,1,,
18856,CC009,"275,276x277",0,1,0,6/1/16,6/1/16,8/8/16,10/25/16,2,146,146,,,NA,NA,5,11/14/16,2,2,1,,4,1,1,1,,
18856,CC009,"275,276x277",0,1,0,6/1/16,6/1/16,8/8/16,12/6/16,3,188,188,,,NA,NA,5,12/27/16,1,4,0,,5,0,1,1,,
18856,CC009,"275,276x277",0,1,0,6/1/16,6/1/16,8/8/16,1/18/17,4,231,231,,,NA,NA,1,NA,0,0,1,missing,0,1,1,0,missing,
18856,CC009,"275,276x277",0,1,0,6/1/16,6/1/16,8/8/16,1/27/17,5,240,240,,,NA,NA,1,NA,0,0,1,missing,0,1,1,0,missing,
18856,CC009,"278,279x280",0,1,0,8/16/16,8/16/16,9/6/16,12/2/16,1,108,108,,,108,NA,3,12/27/16,1,1,1,,2,1,1,1,,
18856,CC009,"281,282x283",0,1,0,7/26/16,7/26/16,9/6/16,10/11/16,1,77,77,,,77,NA,1,NA,0,0,1,missing,0,1,1,0,missing,
18856,CC009,"281,282x283",0,1,0,7/26/16,7/26/16,9/6/16,11/14/16,2,111,111,,,NA,NA,2,NA,0,0,2,2 missing,0,2,1,0,2 missing,
18856,CC009,"281,282x283",0,1,0,7/26/16,7/26/16,9/6/16,11/29/16,3,126,126,,,NA,NA,5,12/27/16,1,3,1,,4,1,1,1,,
18856,CC009,"281,282x283",0,1,0,7/26/16,7/26/16,9/6/16,2/4/17,4,193,193,,,NA,NA,2,3/6/17,1,1,0,283 pulled4/17/17,2,0,1,1,283 pulled4/17/17,
18856,CC009,"284,285x286",0,1,0,8/31/16,8/31/16,9/26/16,11/12/16,1,73,73,,,73,NA,2,NA,0,0,2,2 missing,0,2,1,0,2 missing,
18856,CC009,"284,285x286",0,1,0,8/31/16,8/31/16,9/26/16,12/14/16,2,105,105,,,NA,NA,3,1/9/17,1,1,1,,2,1,1,1,,
18856,CC009,287x288,1,0,0,8/31/16,8/31/16,9/16/16,1/3/17,1,125,125,,,125,NA,4,1/30/17,2,2,0,,4,0,1,1,,
18856,CC009,287x288,1,0,0,8/31/16,8/31/16,9/16/16,2/25/17,2,178,178,,,NA,53,4,4/10/17,2,2,0,,4,0,1,1,,
18856,CC009,289x290,1,0,0,9/13/16,9/13/16,10/10/16,11/29/16,1,77,77,,,77,NA,6,12/27/16,3,3,0,,6,0,1,1,,
18856,CC009,289x290,1,0,0,9/13/16,9/13/16,10/10/16,1/15/17,2,124,124,,,NA,47,1,NA,0,0,1,,0,1,1,0,,
18856,CC009,289x290,1,0,0,9/13/16,9/13/16,10/10/16,2/8/17,3,148,148,,,NA,24,2,NA,1,1,0,no wean date on card,2,0,1,1,no wean date on card,
18856,CC009,289x290,1,0,0,9/13/16,9/13/16,10/10/16,5/5/17,4,234,234,,,NA,86,3,NA,0,0,3,,0,3,1,0,,
18856,CC009,291x292,1,0,0,9/27/16,9/27/16,10/17/16,1/3/17,1,98,98,,,98,NA,3,1/30/17,0,3,0,,3,0,1,1,,
18856,CC009,"293,294,295x296",0,0,1,10/4/16,10/4/16,10/24/16,12/14/16,1,71,71,,,71,NA,6,1/9/17,3,3,0,,6,0,1,1,,
18856,CC009,"293,294,295x296",0,0,1,10/4/16,10/4/16,10/24/16,5/16/17,2,224,224,,,NA,NA,1,NA,0,0,1,missing; male pulled 6/5/17,0,1,1,0,missing; male pulled 6/5/17,
18856,CC009,"297,298x299",0,1,0,10/25/16,10/25/16,11/14/16,1/3/17,1,70,70,1/9/17,,70,NA,7,1/30/17,0,7,0,,7,0,2,2,,
18856,CC009,"297,298x299",0,1,0,10/25/16,10/25/16,11/14/16,2/12/17,2,110,110,2/17/17,,NA,NA,8,3/6/17,3,5,0,,8,0,2,2,,
18856,CC009,"297,298x299",0,1,0,10/25/16,10/25/16,11/14/16,3/6/17,3,132,132,,,NA,NA,3,NA,0,0,3,missing,0,3,1,0,missing,
18856,CC009,"297,298x299",0,1,0,10/25/16,10/25/16,11/14/16,3/29/17,4,155,155,,,NA,NA,7,4/17/17,5,2,0,,7,0,1,1,,
18856,CC009,"297,298x299",0,1,0,10/25/16,10/25/16,11/14/16,4/24/17,5,181,181,,,NA,NA,2,NA,0,0,2,missing,0,2,1,0,missing,
18856,CC009,"297,298x299",0,1,0,10/25/16,10/25/16,11/14/16,5/13/17,6,200,200,,,NA,NA,1,NA,0,0,1,missing; male pulled 6/5/17,0,1,1,0,missing; male pulled 6/5/17,
18856,CC009,300x301,1,0,0,11/8/16,11/8/16,11/29/16,1/12/17,1,65,65,,,65,NA,2,2/27/17,0,0,2,,0,2,1,0,,
18856,CC009,"302,303x304",0,1,0,11/29/16,11/29/16,12/27/16,5/9/17,1,161,161,,,161,NA,6,6/5/17,1,5,0,,6,0,1,1,,
18856,CC009,"302,303x304",0,1,0,11/29/16,11/29/16,12/27/16,6/28/17,2,211,211,,,NA,NA,2,NA,0,0,2,2 missing,0,2,1,0,2 missing,
18856,CC009,305x306,1,0,0,12/6/16,12/6/16,12/27/16,3/5/17,1,89,89,,,89,NA,4,3/27/17,0,4,0,,4,0,1,1,,
18856,CC009,305x306,1,0,0,12/6/16,12/6/16,12/27/16,4/29/17,2,144,144,,,NA,55,4,5/22/17,2,2,0,,4,0,1,1,,
18856,CC009,305x306,1,0,0,12/6/16,12/6/16,12/27/16,5/21/17,3,166,166,,,NA,22,3,6/12/17,3,0,0,,3,0,1,1,,
18856,CC009,"307,308x309",0,1,0,12/13/16,12/13/16,1/9/17,4/14/17,1,122,122,,,122,NA,4,5/15/17,0,2,2,0,2,2,1,1,,
18856,CC009,"307,308x309",0,1,0,12/13/16,12/13/16,1/9/17,4/30/17,2,138,138,,,NA,NA,2,5/30/17,1,1,0,0,2,0,1,1,,
18856,CC009,310x311,1,0,0,12/13/16,12/13/16,1/9/17,2/21/17,1,70,70,,,70,NA,6,3/13/17,3,3,0,0,6,0,1,1,,
18856,CC009,310x311,1,0,0,12/13/16,12/13/16,1/9/17,4/4/17,2,112,112,,,NA,42,3,4/28/17,0,3,0,0,3,0,1,1,,
18856,CC009,310x311,1,0,0,12/13/16,12/13/16,1/9/17,6/17/17,3,186,186,,,NA,74,4,7/17/17,1,3,0,0,4,0,1,1,,
18856,CC009,310x311,1,0,0,12/13/16,12/13/16,2/27/17,3/21/17,4,98,98,,,NA,-88,4,4/10/17,2,2,,,4,0,1,1,,
18856,CC009,310x311,1,0,0,12/13/16,12/13/16,2/27/17,5/13/17,5,151,151,,,NA,53,4,6/5/17,2,0,,,2,2,1,1,,
18856,CC009,"312,313x314",0,1,0,2/14/17,2/14/17,3/6/17,4/21/17,1,66,66,,,66,NA,6,5/15/17,4,2,,,6,0,1,1,,
18856,CC009,"312,313x314",0,1,0,2/14/17,2/14/17,3/6/17,4/30/17,2,75,75,,,NA,NA,2,5/30/17,2,0,,,2,0,1,1,,
18856,CC009,"312,313x314",0,1,0,2/14/17,2/14/17,3/6/17,6/8/17,3,114,114,,,NA,NA,5,7/7/17,3,1,,,4,1,1,1,,
18856,CC009,"312,313x314",0,1,0,2/14/17,2/14/17,3/6/17,7/3/17,4,139,139,,,NA,NA,1,NA,0,0,,,0,1,1,0,1 found dead,
18856,CC009,"315,316x317",0,1,0,2/21/17,2/21/17,3/13/17,NA,1,NA,NA,,,NA,NA,0,NA,0,0,,,0,0,1,0,nonproductive,
18856,CC009,"315,316x317",0,1,0,9/12/17,9/12/17,10/2/17,11/13/17,2,62,62,,,NA,NA,4,12/4/17,0,4,,,4,0,1,1,,
18856,CC009,"315,316x317",0,1,0,9/12/17,9/12/17,10/2/17,11/19/17,3,68,68,,,NA,NA,7,12/26/17,1,3,,,4,3,1,1,3 missing,
18856,CC009,"315,316x317",0,1,0,9/12/17,9/12/17,10/2/17,12/12/17,4,91,91,,,NA,NA,5,1/8/18,4,1,,,5,0,1,1,,
18856,CC009,"315,316x317",0,1,0,9/12/17,9/12/17,10/2/17,12/25/17,5,104,104,,,NA,NA,2,NA,0,0,,,0,2,1,0,missing,
18856,CC009,"315,316x317",0,1,0,9/12/17,9/12/17,10/2/17,1/3/18,6,113,113,,,NA,NA,4,1/22/18,1,3,,,4,0,1,1,,
18856,CC009,"315,316x317",0,1,0,9/12/17,9/12/17,10/2/17,1/27/18,7,137,137,,,NA,NA,5,2/19/18,0,5,,,5,0,1,1,,
18856,CC009,"315,316x317",0,1,0,9/12/17,9/12/17,10/2/17,2/19/18,8,160,160,,,NA,NA,8,3/12/18,2,5,,,7,1,1,1,missing,
18856,CC009,"315,316x317",0,1,0,9/12/17,9/12/17,10/2/17,3/14/18,9,183,183,,,NA,NA,2,4/9/18,1,1,,,2,0,1,1,,
18856,CC009,"315,316x317",0,1,0,9/12/17,9/12/17,10/2/17,4/2/18,10,202,202,,,NA,NA,2,4/27/18,0,1,,,1,1,1,1,,
18856,CC009,"318,319x320",0,1,0,2/7/17,2/7/17,3/13/17,4/26/17,1,78,78,,,78,NA,5,5/22/17,5,0,,,5,0,1,1,male pulled 9/18/17,
18856,CC009,"318,319x320",0,1,0,2/7/17,2/7/17,3/13/17,5/10/17,2,92,92,,,NA,NA,2,6/5/17,0,0,,,0,2,1,0,male pulled 9/18/17,
18856,CC009,"318,319x320",0,1,0,2/7/17,2/7/17,3/13/17,6/5/17,3,118,118,,,NA,NA,8,6/26/17,4,3,,,7,1,1,1,male pulled 9/18/17,
18856,CC009,"318,319x320",0,1,0,2/7/17,2/7/17,3/13/17,6/15/17,4,128,128,,,NA,NA,2,7/17/17,0,2,,,2,0,1,1,male pulled 9/18/17,
18856,CC009,"318,319x320",0,1,0,2/7/17,2/7/17,3/13/17,7/16/17,5,159,159,,,NA,NA,5,8/14/17,3,2,,,5,0,1,1,male pulled 9/18/17,
18856,CC009,"321,322x323",0,1,0,3/21/17,3/21/17,4/10/17,5/31/17,1,71,71,,,71,NA,5,6/12/17,NA,NA,NA,NA,NA,NA,1,0,missing pups,
18856,CC009,"321,322x323",0,1,0,3/21/17,3/21/17,4/10/17,5/28/17,2,68,68,,,NA,NA,5,6/19/17,2,3,0,0,5,0,1,1,,
18856,CC009,"324,325x326",0,1,0,3/28/17,3/28/17,4/17/17,6/7/17,1,71,71,,,71,NA,3,6/26/17,1,2,,,3,0,1,1,male pulled 9/18/17,
18856,CC009,"324,325x326",0,1,0,3/28/17,3/28/17,4/17/17,6/9/17,2,73,73,,,NA,NA,2,7/7/17,0,0,,,0,2,1,0,male pulled 9/18/17,
18856,CC009,"324,325x326",0,1,0,3/28/17,3/28/17,4/17/17,7/17/17,3,111,111,,,NA,NA,3,8/14/17,0,0,,,0,3,1,0,male pulled 9/18/17,
18856,CC009,"327,328x329",0,1,0,3/28/17,3/28/17,4/17/17,NA,1,NA,NA,,,NA,NA,0,NA,0,0,,,0,0,1,0,nonproductive,
18856,CC009,"330,331x332",0,1,0,4/21/17,4/21/17,5/15/17,6/28/17,1,68,68,,,68,NA,3,7/31/17,3,0,,,3,0,1,1,,
18856,CC009,"330,331x332",0,1,0,4/21/17,4/21/17,5/15/17,7/10/17,2,80,80,,,NA,NA,2,8/7/17,1,1,,,2,0,1,1,,
18856,CC009,"330,331x332",0,1,0,4/21/17,4/21/17,5/15/17,8/22/17,3,123,123,,,NA,NA,4,9/18/17,1,3,,,4,0,1,1,,
18856,CC009,"330,331x332",0,1,0,4/21/17,4/21/17,5/15/17,11/13/17,4,206,206,,,NA,NA,1,11/20/17,0,0,,,0,1,1,0,missing; male pulled 12/26/17,
18856,CC009,"333,334x335",0,1,0,4/21/17,4/21/17,5/15/17,NA,1,NA,NA,,,NA,NA,0,NA,0,0,0,0,0,0,1,0,,
18856,CC009,"336,337x338",0,1,0,4/2/17,3/14/17,5/22/17,6/16/17,1,75,94,,,75,NA,3,7/17/17,2,1,,,3,0,1,1,,
18856,CC009,"336,337x338",0,1,0,4/2/17,3/14/17,5/22/17,6/4/17,2,63,82,,,NA,NA,5,7/17/17,0,5,,,5,0,1,1,,
18856,CC009,"339,340x341",0,1,0,4/25/17,3/14/17,5/22/17,6/6/17,1,42,84,6/19/17,,42,NA,7,7/17/17,1,6,,,7,0,2,2,,
18856,CC009,"339,340x341",0,1,0,4/25/17,3/14/17,5/22/17,8/18/17,2,115,157,,,NA,NA,4,9/18/17,0,3,,,3,1,1,1,1 missing,
18856,CC009,"342,343x344",0,1,0,5/2/17,5/2/17,5/22/17,7/10/17,1,69,69,,,69,NA,3,8/7/17,1,2,,,3,0,1,1,,
18856,CC009,"342,343x344",0,1,0,5/2/17,5/2/17,5/22/17,8/26/17,2,116,116,,,NA,NA,4,9/25/17,0,4,,,4,0,1,1,,
18856,CC009,"342,343x344",0,1,0,5/2/17,5/2/17,5/22/17,10/17/17,3,168,168,,,NA,NA,3,11/13/17,1,2,,,3,0,1,1,,
18856,CC009,"342,343x344",0,1,0,5/2/17,5/2/17,5/22/17,9/27/17,4,148,148,,,NA,NA,4,10/27/17,1,2,,,3,1,1,1,,
18856,CC009,"342,343x344",0,1,0,5/2/17,5/2/17,5/22/17,10/16/17,5,167,167,10/18/17,,NA,NA,8,11/6/17,6,1,,,7,1,2,2,1 female AH; 483 derm 10/30/17,
18856,CC009,"345,346x347",0,1,0,5/2/17,5/2/17,5/30/17,7/20/17,1,79,79,,,79,NA,4,8/14/17,0,2,,,2,2,1,1,,
18856,CC009,"348,349x350",0,1,0,5/5/17,5/5/17,6/5/17,7/24/17,1,80,80,,,80,NA,1,8/2/17,0,0,,,0,1,1,0,missing,
18856,CC009,"348,349x350",0,1,0,5/5/17,5/5/17,6/5/17,8/14/17,2,101,101,,,NA,NA,2,8/22/17,0,0,,,0,2,1,0,missing,
18856,CC009,"348,349x350",0,1,0,5/5/17,5/5/17,6/5/17,10/18/17,3,166,166,,,NA,NA,2,11/6/17,0,0,,,0,2,1,0,missing,
18856,CC009,"351,352x353",0,1,0,5/16/17,5/16/17,6/5/17,7/24/17,1,69,69,,,69,NA,4,8/14/17,2,1,,,3,1,1,1,,
18856,CC009,354x355,1,0,0,5/9/17,5/9/17,6/5/17,7/20/17,1,72,72,,,72,NA,3,8/14/17,1,2,,,3,0,1,1,,
18856,CC009,354x355,1,0,0,5/9/17,5/9/17,6/5/17,9/10/17,2,124,124,,,NA,52,3,10/2/17,0,3,,,3,0,1,1,,
18856,CC009,354x355,1,0,0,5/9/17,5/9/17,6/5/17,10/25/17,3,169,169,,,NA,45,1,11/13/17,0,0,,,0,1,1,0,missing,
18856,CC009,"356,357x358",0,1,0,5/21/17,4/11/17,6/12/17,7/16/17,1,56,96,,,56,NA,8,8/7/17,4,4,,,8,0,1,1,,
18856,CC009,"356,357x358",0,1,0,5/21/17,4/11/17,6/12/17,8/23/17,2,94,134,,,NA,NA,3,9/18/17,2,1,,,3,0,1,1,,
18856,CC009,"356,357x358",0,1,0,5/21/17,4/11/17,6/12/17,8/31/17,3,102,142,,,NA,NA,7,9/25/17,5,2,,,7,0,1,1,,
18856,CC009,359x360,1,0,0,5/21/17,4/11/17,6/12/17,7/11/17,1,51,91,,,51,NA,7,8/7/17,4,3,,,7,0,1,1,,
18856,CC009,359x360,1,0,0,5/21/17,4/11/17,6/12/17,10/3/17,2,135,175,,,NA,84,4,NA,NA,NA,,,NA,0,1,0,,
18856,CC009,"361,362x363",0,1,0,5/20/17,5/20/17,6/19/17,8/8/17,1,80,80,,,80,NA,2,8/28/17,0,1,,,1,1,1,1,,
18856,CC009,"361,362x363",0,1,0,5/20/17,5/20/17,6/19/17,8/15/17,2,87,87,,,NA,NA,4,9/5/17,1,1,,,2,2,1,1,,
18856,CC009,"364,365x366",0,1,0,6/5/17,6/5/17,6/26/17,9/9/17,1,96,96,,,96,NA,3,10/2/17,0,3,,,3,0,1,1,,
18856,CC009,"364,365x366",0,1,0,6/5/17,6/5/17,6/26/17,9/25/17,2,112,112,,,NA,NA,3,10/23/17,0,3,,,3,0,1,1,,
18856,CC009,"367,368x369",0,1,0,6/5/17,6/5/17,6/26/17,8/15/17,1,71,71,,,71,NA,4,9/5/17,2,1,,,3,1,1,1,,
18856,CC009,"367,368x369",0,1,0,6/5/17,6/5/17,6/26/17,9/11/17,2,98,98,,,NA,NA,3,10/9/17,1,2,,,3,0,1,1,,
18856,CC009,"367,368x369",0,1,0,6/5/17,6/5/17,6/26/17,12/6/17,3,184,184,,,NA,NA,3,NA,0,0,,,0,3,1,0,missing,
18856,CC009,"370,371,372x373",0,0,1,6/8/17,6/8/17,7/3/17,9/13/17,1,97,97,,,97,NA,2,10/9/17,1,1,,,2,0,1,1,,
18856,CC009,"370,371,372x373",0,0,1,6/8/17,6/8/17,7/3/17,9/26/17,2,110,110,,,NA,NA,4,10/22/17,2,2,,,4,0,1,1,,
18856,CC009,"370,371,372x373",0,0,1,6/8/17,6/8/17,7/3/17,10/5/17,3,119,119,,,NA,NA,3,10/30/17,2,1,,,3,0,1,1,,
18856,CC009,"370,371,372x373",0,0,1,6/8/17,6/8/17,7/3/17,12/2/17,4,177,177,12/5/17,,NA,NA,5,12/26/17,1,4,,,5,0,2,2,,
18856,CC009,"370,371,372x373",0,0,1,6/8/17,6/8/17,7/3/17,12/12/17,5,187,187,,,NA,NA,3,1/3/18,1,1,,,2,1,1,1,missing,
18856,CC009,"374,375x376",0,1,0,6/16/17,6/16/17,7/17/17,8/24/17,1,69,69,,,69,NA,3,9/18/17,2,1,,,3,0,1,1,,
18856,CC009,"374,375x376",0,1,0,6/16/17,6/16/17,7/17/17,9/7/17,2,83,83,,,NA,NA,4,10/2/17,4,0,,,4,0,1,1,,
18856,CC009,"374,375x376",0,1,0,6/16/17,6/16/17,7/17/17,10/24/17,3,130,130,,,NA,NA,3,11/13/17,0,0,,,0,3,1,0,missing,
18856,CC009,"377,378x379",0,1,0,6/6/17,6/27/17,7/31/17,8/21/17,1,76,55,,,76,NA,5,9/18/17,3,2,,,5,0,1,1,,
18856,CC009,"377,378x379",0,1,0,6/6/17,6/27/17,7/31/17,10/20/17,2,136,115,,,NA,NA,5,11/12/17,1,4,,,5,0,1,1,,
18856,CC009,"380,381x382",0,1,0,6/6/17,6/27/17,7/7/17,8/22/17,1,77,56,8/25/17,,77,NA,9,9/18/17,4,5,,,9,0,2,2,,
18856,CC009,"380,381x382",0,1,0,6/6/17,6/27/17,7/7/17,10/3/17,2,119,98,,,NA,NA,6,10/27/17,2,4,,,6,0,1,1,,
18856,CC009,"380,381x382",0,1,0,6/6/17,6/27/17,7/7/17,11/10/17,3,157,136,,,NA,NA,2,11/27/17,0,0,,,0,2,1,0,missing,
18856,CC009,"383,384x385",0,1,0,7/16/17,7/16/17,8/14/17,11/7/17,1,114,114,,,114,NA,1,NA,0,0,,,0,1,1,0,missing,
18856,CC009,386x387,1,0,0,7/16/17,7/16/17,8/14/17,9/27/17,1,73,73,,,73,NA,5,10/16/17,1,4,,,5,0,1,1,,
18856,CC009,386x387,1,0,0,7/16/17,7/16/17,8/14/17,11/6/17,2,113,113,,,NA,40,3,11/27/17,2,1,,,3,0,1,1,,
18856,CC009,386x387,1,0,0,7/16/17,7/16/17,8/14/17,12/15/17,3,152,152,,,NA,39,1,1/3/18,0,0,,,0,1,1,0,missing pup,
18856,CC009,386x387,1,0,0,7/16/17,7/16/17,8/14/17,1/29/18,4,197,197,,,NA,45,5,2/19/18,5,0,,,5,0,1,1,,
18856,CC009,"388,389x390",0,1,0,7/24/17,7/24/17,8/14/17,NA,1,NA,NA,,,NA,NA,0,NA,0,0,,,0,0,1,0,nonproductive,
18856,CC009,"39,397x398",0,1,0,8/15/17,8/15/17,9/5/17,10/17/17,1,63,63,,,63,NA,4,11/13/17,4,0,,,4,0,1,1,,
18856,CC009,"39,397x398",0,1,0,8/15/17,8/15/17,9/5/17,11/23/17,2,100,100,,,NA,NA,5,12/19/17,1,3,,,4,1,1,1,,
18856,CC009,"39,397x398",0,1,0,8/15/17,8/15/17,9/5/17,12/7/17,3,114,114,,,NA,NA,1,1/3/18,0,0,,,0,1,1,0,missing,
18856,CC009,"39,397x398",0,1,0,8/15/17,8/15/17,9/5/17,2/13/18,4,182,182,,,NA,NA,4,3/12/18,0,4,,,4,0,1,1,,
18856,CC009,"391,392x393",0,1,0,7/20/17,7/20/17,8/14/17,10/1/17,1,73,73,10/4/17,,73,NA,6,11/30/17,2,4,,,6,0,2,2,,
18856,CC009,394x395,1,0,0,8/15/17,8/15/17,9/5/17,10/27/17,1,73,73,,,73,NA,2,11/27/17,1,1,,,2,0,1,1,,
18856,CC009,399x400,1,0,0,9/11/17,9/11/17,10/9/17,11/19/17,1,69,69,,,69,NA,4,12/11/17,0,3,,,3,1,1,1,1 FD,
18856,CC009,399x400,1,0,0,9/11/17,9/11/17,10/9/17,12/29/17,2,109,109,,,NA,40,3,1/22/18,2,1,,,3,0,1,1,,
18856,CC009,399x400,1,0,0,9/11/17,9/11/17,10/9/17,2/8/18,3,150,150,,,NA,41,5,3/5/18,0,5,,,5,0,1,1,,
18856,CC009,401x402,1,0,0,9/13/17,9/13/17,10/9/17,11/25/17,1,73,73,,,73,NA,4,12/19/17,1,2,,,3,1,1,1,1 AH female,
18856,CC009,401x402,1,0,0,9/13/17,9/13/17,10/9/17,1/4/18,2,113,113,,,NA,40,4,1/29/18,3,1,,,4,0,1,1,,
18856,CC009,401x402,1,0,0,9/13/17,9/13/17,10/9/17,2/14/18,3,154,154,,,NA,41,4,3/12/18,1,2,,,3,1,1,1,,
18856,CC009,401x402,1,0,0,9/13/17,9/13/17,10/9/17,4/9/18,4,208,208,,,NA,54,5,4/30/18,2,2,,,4,1,1,1,,
18856,CC009,401x402,1,0,0,9/13/17,9/13/17,10/9/17,5/22/18,5,251,251,,,NA,43,1,NA,0,0,,,0,1,1,0,1 BD,
18856,CC009,"403,404x40",0,1,0,10/3/17,10/3/17,10/23/17,12/13/17,1,71,71,,,71,NA,6,1/3/18,3,3,,,6,0,1,1,,
18856,CC009,"403,404x40",0,1,0,10/3/17,10/3/17,10/23/17,12/19/17,2,77,77,,,NA,NA,4,NA,0,0,,,0,4,1,0,4 missing,
18856,CC009,"403,404x40",0,1,0,10/3/17,10/3/17,10/23/17,2/20/18,3,140,140,,,NA,NA,3,3/19/18,0,2,,,2,1,1,1,,
18856,CC009,"403,404x40",0,1,0,10/3/17,10/3/17,10/23/17,2/27/18,4,147,147,,,NA,NA,1,3/26/18,1,0,,,1,0,1,1,,
18856,CC009,"403,404x40",0,1,0,10/3/17,10/3/17,10/23/17,3/19/18,5,167,167,,,NA,NA,1,NA,0,0,,,0,1,1,0,missing,
18856,CC009,"403,404x40",0,1,0,10/3/17,10/3/17,10/23/17,4/17/18,6,196,196,,,NA,NA,NA,NA,0,0,,,0,NA,1,0,no pups,
18856,CC009,"403,404x40",0,1,0,10/3/17,10/3/17,10/23/17,5/14/18,7,223,223,,,NA,NA,1,NA,0,0,,,0,1,1,0,missing; 405 FD 6/4/18,
18856,CC009,"406,407x408",0,1,0,9/26/17,9/26/17,10/23/17,11/28/17,1,63,63,,,63,NA,5,12/19/17,1,3,,,4,1,1,1,1 missing ,
18856,CC009,"406,407x408",0,1,0,9/26/17,9/26/17,10/23/17,12/8/17,2,73,73,,,NA,NA,1,1/3/18,0,0,,,0,1,1,0,missing; male FD 4/9/18,
18856,CC009,"409,410x411",0,1,0,10/3/17,10/3/17,11/1/17,12/19/17,1,77,77,,,77,NA,3,1/15/18,1,1,,,2,1,1,1,,
18856,CC009,"412,413x414",0,1,0,10/3/17,10/3/17,11/13/17,12/18/17,1,76,76,,,76,NA,3,1/15/18,1,2,,,3,0,1,1,LNR; short tails,
18856,CC009,415x416,1,0,0,11/28/17,11/28/17,12/19/17,3/27/18,1,119,119,,,119,NA,2,4/16/18,0,2,,,2,0,1,1,,
18856,CC009,415x416,1,0,0,11/28/17,11/28/17,12/19/17,5/7/18,2,160,160,,,NA,41,4,5/29/18,2,2,,,4,0,1,1,,
18856,CC009,417x418,1,0,0,11/25/17,11/25/17,12/19/17,1/20/18,1,56,56,,,56,NA,2,NA,0,0,,,0,2,1,0,missing,
18856,CC009,417x418,1,0,0,11/25/17,11/25/17,12/19/17,4/1/18,2,127,127,,,NA,71,2,4/16/18,0,0,,,0,2,1,0,missing,
18856,CC009,417x418,1,0,0,11/25/17,11/25/17,12/19/17,5/10/18,3,166,166,,,NA,39,2,6/11/18,0,0,,,0,2,1,0,missing,
18856,CC009,419x420,1,0,0,11/23/17,11/23/17,12/19/17,2/8/18,1,77,77,,,77,NA,4,3/5/18,2,2,,,4,0,1,1,419 escaped 3/20,
18856,CC009,"421,422x423",0,1,0,12/13/17,12/13/17,1/3/18,2/22/18,1,71,71,,,71,NA,7,3/19/18,3,4,,,7,0,1,1,,
18856,CC009,"421,422x423",0,1,0,12/13/17,12/13/17,1/3/18,4/12/18,2,120,120,,,NA,NA,6,4/20/18,1,5,,,6,0,1,1,,
18856,CC009,424x425,1,0,0,12/13/17,12/13/17,1/3/18,3/15/18,1,92,92,,,92,NA,2,4/16/18,1,1,0,,2,0,1,1,,
18856,CC009,424x425,1,0,0,12/13/17,12/13/17,1/3/18,NA,2,NA,NA,,,NA,NA,4,5/31/18,2,1,1,LNR; no litter DOB on cage card,3,1,1,1,LNR; no litter DOB on cage card,
18856,CC009,426x427,1,0,0,12/12/17,12/12/17,1/3/18,2/20/18,1,70,70,,,70,NA,3,3/12/18,1,2,0,,3,0,1,1,,
18856,CC009,426x427,1,0,0,12/12/17,12/12/17,1/3/18,4/3/18,2,112,112,,,NA,42,2,4/30/18,0,2,0,,2,0,1,1,,
18856,CC009,426x427,1,0,0,12/12/17,12/12/17,1/3/18,5/30/18,3,169,169,,,NA,57,3,6/18/18,1,2,0,427 removed 8/7/18,3,0,1,1,427 removed 8/7/18,
18856,CC009,428x429,1,0,0,12/19/17,12/19/17,1/15/18,3/2/18,1,73,73,,,73,NA,3,4/2/18,0,3,0,1 missing,3,0,1,1,1 missing,
18856,CC009,428x429,1,0,0,12/19/17,12/19/17,1/15/18,LNR,2,NA,NA,,,NA,NA,2,5/31/18,0,2,0,,2,0,1,1,,
18856,CC009,428x429,1,0,0,12/19/17,12/19/17,1/15/18,5/31/18,3,163,163,,,NA,NA,3,NA,0,0,3,missing,0,3,1,0,missing,
18856,CC009,428x429,1,0,0,12/19/17,12/19/17,1/15/18,7/16/18,4,209,209,,,NA,46,3,8/6/18,1,2,0,,3,0,1,1,,
18856,CC009,"430,431x432",0,1,0,12/29/17,12/29/17,1/22/18,3/16/18,1,77,77,3/21/18,,77,NA,6,4/9/18,3,3,0,,6,0,2,2,,
18856,CC009,433x434,1,0,0,12/5/17,12/5/17,1/22/18,4/9/18,1,125,125,,,125,NA,1,NA,0,0,1,missing,0,1,1,0,missing,
18856,CC009,433x434,1,0,0,12/5/17,12/5/17,1/22/18,5/30/18,2,176,176,,,NA,51,4,6/18/18,2,2,0,,4,0,1,1,,
18856,CC009,"435,436,437x438",0,0,1,1/4/18,1/4/18,1/29/18,3/19/18,1,74,74,,,74,NA,4,4/16/18,2,2,0,,4,0,1,1,,
18856,CC009,"435,436,437x438",0,0,1,1/4/18,1/4/18,1/29/18,4/7/18,2,93,93,,,NA,NA,1,4/30/18,0,1,0,,1,0,1,1,,
18856,CC009,"435,436,437x438",0,0,1,1/4/18,1/4/18,1/29/18,4/30/18,3,116,116,,,NA,NA,4,NA,0,0,4,missing,0,4,1,0,missing,
18856,CC009,"435,436,437x438",0,0,1,1/4/18,1/4/18,1/29/18,6/18/18,4,165,165,,,NA,NA,1,NA,0,0,1,missing,0,1,1,0,missing,
18856,CC009,"439,440x441",0,1,0,1/30/18,12/5/17,2/19/18,3/26/18,1,55,111,,,55,NA,1,NA,0,0,1,missing,0,1,1,0,missing,
18856,CC009,"442,443x444",0,1,0,1/30/18,12/5/17,2/19/18,3/25/18,1,54,110,,,54,NA,3,4/16/18,0,3,0,,3,0,1,1,,
18856,CC009,"442,443x444",0,1,0,1/30/18,12/5/17,2/19/18,5/10/18,2,100,156,,,NA,NA,2,6/4/18,0,0,2,missing,0,2,1,0,missing,
18856,CC009,445x446,1,0,0,1/20/18,12/5/17,2/19/18,3/19/18,1,58,104,,,58,NA,6,4/16/18,1,2,3,,3,3,1,1,,
18856,CC009,445x446,1,0,0,1/20/18,12/5/17,2/19/18,5/15/18,2,115,161,,,NA,57,4,6/11/18,2,2,0,,4,0,1,1,,
18856,CC009,445x446,1,0,0,1/20/18,12/5/17,2/19/18,6/27/18,3,158,204,,,NA,43,3,7/23/18,1,1,1,1 missing,2,1,1,1,1 missing,
18856,CC009,"447,448x449",0,1,0,2/8/18,2/8/18,3/5/18,4/17/18,1,68,68,,,68,NA,2,NA,0,0,,,0,2,1,0,2 missing,
18856,CC009,"447,448x449",0,1,0,2/8/18,2/8/18,3/5/18,5/8/18,2,89,89,,,NA,NA,6,6/4/18,4,2,,,6,0,1,1,449 FD 5/8/18,
18856,CC009,450x451,1,0,0,2/14/18,2/14/18,3/12/18,5/25/18,1,100,100,,,100,NA,2,6/18/18,0,2,0,,2,0,1,1,,
18856,CC009,452x453,1,0,0,2/20/18,2/20/18,3/12/18,5/23/18,1,92,92,,,92,NA,2,6/18/18,1,1,0,,2,0,1,1,,
18856,CC009,452x453,1,0,0,2/20/18,2/20/18,3/12/18,7/10/18,2,140,140,,,NA,48,2,NA,0,0,2,missing,0,2,1,0,missing,
18856,CC009,452x453,1,0,0,2/20/18,2/20/18,3/12/18,8/26/18,3,187,187,,,NA,47,3,9/24/18,2,1,0,,3,0,1,1,,
18856,CC009,454x455,1,0,0,2/20/18,2/20/18,3/19/18,5/30/18,1,99,99,,,99,NA,5,6/18/18,1,2,2,1 BD; 1 missing,3,2,1,1,1 BD; 1 missing,
18856,CC009,454x455,1,0,0,2/20/18,2/20/18,3/19/18,7/21/18,2,151,151,,,NA,52,1,NA,0,0,1,1 missing,0,1,1,0,1 missing,
18856,CC009,456x457,1,0,0,2/27/18,2/27/18,3/26/18,4/20/18,1,52,52,,,52,NA,5,5/29/18,2,1,2,1 missing,3,2,1,1,1 missing,
18856,CC009,456x457,1,0,0,2/27/18,2/27/18,3/26/18,5/15/18,2,77,77,,,NA,25,4,NA,0,0,4,1 BD; missing,0,4,1,0,1 BD; missing,
18856,CC009,456x457,1,0,0,2/27/18,2/27/18,3/26/18,6/25/18,3,118,118,,,NA,41,1,NA,0,0,1,1 missing,0,1,1,0,1 missing,
18856,CC009,461x462,1,0,0,3/20/18,3/20/18,4/9/18,6/19/18,1,91,91,,,91,NA,3,7/16/18,1,2,0,,3,0,1,1,,
18856,CC009,"470,471x472",0,1,0,4/9/18,4/9/18,4/30/18,6/18/18,1,70,70,6/21/18,,70,NA,6,7/16/18,3,3,0,,6,0,2,2,,
18856,CC009,473x474,1,0,0,4/12/18,4/12/18,5/30/18,6/22/18,1,71,71,,,71,NA,5,7/16/18,3,2,0,,5,0,1,1,,
18856,CC009,473x474,1,0,0,4/12/18,4/12/18,5/30/18,8/7/18,2,117,117,,,NA,46,4,8/27/18,1,3,0,,4,0,1,1,,
18856,CC009,"484,485x486",0,1,0,5/8/18,5/8/18,6/4/18,7/16/18,1,69,69,,,69,NA,4,8/6/18,0,4,0,nonproductive 10/29/18,4,0,1,1,nonproductive 10/29/18,
21889,CC010,01x02,1,0,0,9/23/17,9/23/17,11/21/17,12/20/17,1,88,88,,,88,NA,4,NA,0,0,4,2 missing; 01 hydro 2/1/18,0,4,1,0,2 missing; 01 hydro 2/1/18,
21889,CC010,03x04,1,0,0,9/23/17,9/23/17,11/21/17,NA,1,NA,NA,,,NA,NA,0,NA,0,0,0,,0,0,1,0,,
21889,CC010,"293,294x295",0,1,0,3/15/16,3/15/16,5/9/16,6/5/16,1,82,82,,,82,NA,3,7/6/16,1,2,0,,3,0,1,1,,
21889,CC010,"293,294x295",0,1,0,3/15/16,3/15/16,5/9/16,6/30/16,2,107,107,,,NA,NA,4,7/25/16,2,1,1,missing,3,1,1,1,missing,
21889,CC010,"293,294x295",0,1,0,3/15/16,3/15/16,5/9/16,7/21/16,3,128,128,,,NA,NA,2,8/16/16,0,2,0,,2,0,1,1,,
21889,CC010,"293,294x295",0,1,0,3/15/16,3/15/16,5/9/16,8/13/16,4,151,151,,,NA,NA,3,9/7/16,1,2,0,,3,0,1,1,,
21889,CC010,"293,294x295",0,1,0,3/15/16,3/15/16,5/9/16,9/21/16,5,190,190,,,NA,NA,6,10/18/16,3,2,1,1 FD,5,1,1,1,1 FD,
21889,CC010,"299,300x301",0,1,0,5/10/16,5/10/16,6/30/16,NA,1,NA,NA,,,NA,NA,5,NA,2,2,1,1 missing,4,1,1,1,1 missing,
21889,CC010,"299,300x301",0,1,0,5/10/16,5/10/16,6/30/16,8/5/16,2,87,87,,,NA,NA,8,8/29/16,3,5,0,,8,0,1,1,,
21889,CC010,"299,300x301",0,1,0,5/10/16,5/10/16,6/30/16,8/25/16,3,107,107,,,NA,NA,6,9/12/16,3,2,1,missing,5,1,1,1,missing,
21889,CC010,"299,300x301",0,1,0,5/10/16,5/10/16,6/30/16,8/29/16,4,111,111,,,NA,NA,5,9/20/16,2,3,0,,5,0,1,1,,
21889,CC010,"299,300x301",0,1,0,5/10/16,5/10/16,6/30/16,9/15/16,5,128,128,,,NA,NA,3,10/11/16,3,0,0,,3,0,1,1,,
21889,CC010,"299,300x301",0,1,0,5/10/16,5/10/16,6/30/16,10/6/16,6,149,149,,,NA,NA,4,11/1/16,4,0,0,,4,0,1,1,,
21889,CC010,"299,300x301",0,1,0,5/10/16,5/10/16,6/30/16,10/13/16,7,156,156,,,NA,NA,3,11/9/16,0,2,1,1 missing,2,1,1,1,1 missing,
21889,CC010,"299,300x301",0,1,0,5/10/16,5/10/16,6/30/16,11/20/16,8,194,194,,,NA,NA,4,12/14/16,3,1,0,,4,0,1,1,,
21889,CC010,"299,300x301",0,1,0,5/10/16,5/10/16,6/30/16,12/13/16,9,217,217,,,NA,NA,3,1/12/17,0,2,1,1 missing,2,1,1,1,1 missing,
21889,CC010,"302,303x304",0,1,0,6/7/16,6/7/16,7/6/16,8/11/16,1,65,65,,,65,NA,5,9/12/16,2,1,2,2 missing,3,2,1,1,2 missing,
21889,CC010,"302,303x304",0,1,0,6/7/16,6/7/16,7/6/16,8/31/16,2,85,85,,,NA,NA,6,9/20/16,2,2,2,,4,2,1,1,,
21889,CC010,"302,303x304",0,1,0,6/7/16,6/7/16,7/6/16,9/13/16,3,98,98,,,NA,NA,5,NA,0,0,5,missing,0,5,1,0,missing,
21889,CC010,"302,303x304",0,1,0,6/7/16,6/7/16,7/6/16,10/5/16,4,120,120,,,NA,NA,3,NA,0,0,3,missing,0,3,1,0,missing,
21889,CC010,"302,303x304",0,1,0,6/7/16,6/7/16,7/6/16,10/27/16,5,142,142,,,NA,NA,4,11/22/16,0,3,1,1 missing,3,1,1,1,1 missing,
21889,CC010,"302,303x304",0,1,0,6/7/16,6/7/16,7/6/16,11/17/16,6,163,163,11/22/16,,NA,NA,9,12/4/16,6,2,1,1 missing,8,1,2,2,1 missing,
21889,CC010,"302,303x304",0,1,0,6/7/16,6/7/16,7/6/16,12/9/16,7,185,185,,,NA,NA,4,1/12/17,2,2,0,,4,0,1,1,,
21889,CC010,"305,306x307",0,1,0,5/10/16,5/10/16,7/11/16,7/31/16,1,82,82,8/3/16,,82,NA,11,8/23/16,3,7,1,1 missing,10,1,2,2,1 missing,
21889,CC010,"305,306x307",0,1,0,5/10/16,5/10/16,7/11/16,8/26/16,2,108,108,,,NA,NA,3,NA,0,0,3,missing,0,3,1,0,missing,
21889,CC010,"305,306x307",0,1,0,5/10/16,5/10/16,7/11/16,9/14/16,3,127,127,,,NA,NA,2,NA,0,0,2,1 missing; 1 FD,0,2,1,0,1 missing; 1 FD,
21889,CC010,"305,306x307",0,1,0,5/10/16,5/10/16,7/11/16,9/19/16,4,132,132,,,NA,NA,3,NA,0,0,3,1 FD,0,3,1,0,1 FD,
21889,CC010,"305,306x307",0,1,0,5/10/16,5/10/16,7/11/16,11/27/16,5,201,201,,,NA,NA,3,12/27/16,2,1,0,,3,0,1,1,,
21889,CC010,"305,306x307",0,1,0,5/10/16,5/10/16,7/11/16,12/17/16,6,221,221,,,NA,NA,5,1/16/17,4,1,0,,5,0,1,1,,
21889,CC010,"311,312x313",0,1,0,6/30/16,6/30/16,7/25/16,9/4/16,1,66,66,,,66,NA,2,9/20/16,0,0,2,missing,0,2,1,0,missing,
21889,CC010,"311,312x313",0,1,0,6/30/16,6/30/16,7/25/16,9/23/16,2,85,85,,,NA,NA,6,10/18/16,5,1,0,,6,0,1,1,,
21889,CC010,"311,312x313",0,1,0,6/30/16,6/30/16,7/25/16,10/16/16,3,108,108,,,NA,NA,4,11/14/16,0,1,3,missing,1,3,1,1,missing,
21889,CC010,"311,312x313",0,1,0,6/30/16,6/30/16,7/25/16,12/7/16,4,160,160,,,NA,NA,3,12/22/16,0,0,3,missing,0,3,1,0,missing,
21889,CC010,"311,312x313",0,1,0,6/30/16,6/30/16,7/25/16,12/19/16,5,172,172,,,NA,NA,4,1/12/17,3,0,1,missing,3,1,1,1,missing,
21889,CC010,"311,312x313",0,1,0,6/30/16,6/30/16,7/25/16,1/12/17,6,196,196,,,NA,NA,4,1/31/17,2,2,0,,4,0,1,1,,
21889,CC010,"314,315x316",0,1,0,7/6/16,7/6/16,8/10/16,8/29/16,1,54,54,,,54,NA,7,9/20/16,0,5,2,missing,5,2,1,1,missing,
21889,CC010,"314,315x316",0,1,0,7/6/16,7/6/16,8/10/16,11/23/16,2,140,140,,,NA,NA,4,12/6/16,0,0,4,missing,0,4,1,0,missing,
21889,CC010,"314,315x316",0,1,0,7/6/16,7/6/16,8/10/16,12/15/16,3,162,162,,,NA,NA,1,1/12/17,1,0,0,,1,0,1,1,,
21889,CC010,"314,315x316",0,1,0,7/6/16,7/6/16,8/10/16,1/27/17,4,205,205,,,NA,NA,1,NA,0,0,1,314 culled 11/18/16 with sunken sides,0,1,1,0,314 culled 11/18/16 with sunken sides,
21889,CC010,"317,318x319",0,1,0,7/12/16,7/12/16,8/10/16,NA,1,NA,NA,,,NA,NA,2,NA,2,0,0,,2,0,1,1,,
21889,CC010,"317,318x319",0,1,0,7/12/16,7/12/16,8/10/16,9/22/16,2,72,72,,,NA,NA,3,10/25/16,0,3,0,,3,0,1,1,,
21889,CC010,"317,318x319",0,1,0,7/12/16,7/12/16,8/10/16,10/7/16,3,87,87,,,NA,NA,2,11/1/16,0,2,0,,2,0,1,1,,
21889,CC010,"317,318x319",0,1,0,7/12/16,7/12/16,8/10/16,10/14/16,4,94,94,,,NA,NA,3,11/9/16,2,1,0,,3,0,1,1,,
21889,CC010,"320,321x322",0,1,0,7/12/16,7/12/16,8/10/16,9/22/16,1,72,72,,,72,NA,6,10/18/16,2,2,2,missing,4,2,1,1,missing,
21889,CC010,"320,321x322",0,1,0,7/12/16,7/12/16,8/10/16,10/22/16,2,102,102,,,NA,NA,3,11/9/16,0,0,3,missing,0,3,1,0,missing,
21889,CC010,"323,324x325",0,1,0,8/2/16,8/2/16,8/23/16,10/16/16,1,75,75,,,75,NA,2,11/23/16,1,1,0,,2,0,1,1,,
21889,CC010,"323,324x325",0,1,0,8/2/16,8/2/16,8/23/16,11/22/16,2,112,112,,,NA,NA,1,NA,0,0,1,,0,1,1,0,,
21889,CC010,"323,324x325",0,1,0,8/2/16,8/2/16,8/23/16,1/29/17,3,180,180,,,NA,NA,1,NA,0,0,1,323 out 1/4/17,0,1,1,0,323 out 1/4/17,
21889,CC010,"326,327x328",0,1,0,8/9/16,8/9/16,9/12/16,NA,1,NA,NA,,,NA,NA,0,NA,0,0,,,0,0,1,0,nonproductive,
21889,CC010,"329,330x331",0,1,0,8/23/16,8/23/16,9/12/16,11/4/16,1,73,73,,,73,NA,6,11/29/16,3,1,2,2 missing,4,2,1,1,2 missing,
21889,CC010,"329,330x331",0,1,0,8/23/16,8/23/16,9/12/16,12/10/16,2,109,109,,,NA,NA,5,1/12/17,2,2,1,,4,1,1,1,,
21889,CC010,"329,330x331",0,1,0,8/23/16,8/23/16,9/12/16,1/7/17,3,137,137,,,NA,NA,2,1/31/17,2,0,0,,2,0,1,1,,
21889,CC010,"329,330x331",0,1,0,8/23/16,8/23/16,9/12/16,1/14/17,4,144,144,,,NA,NA,2,NA,0,0,2,,0,2,1,0,,
21889,CC010,"329,330x331",0,1,0,8/23/16,8/23/16,9/12/16,1/30/17,5,160,160,,,NA,NA,2,NA,0,0,2,,0,2,1,0,,
21889,CC010,"329,330x331",0,1,0,8/23/16,8/23/16,9/12/16,2/4/17,6,165,165,,,NA,NA,3,3/1/17,2,1,0,,3,0,1,1,,
21889,CC010,"329,330x331",0,1,0,8/23/16,8/23/16,9/12/16,2/20/17,7,181,181,,,NA,NA,5,3/14/17,2,1,2,,3,2,1,1,,
21889,CC010,"329,330x331",0,1,0,8/23/16,8/23/16,9/12/16,3/2/17,8,191,191,,,NA,NA,8,3/28/17,2,2,4,3 missing,4,4,1,1,3 missing,
21889,CC010,"335,336x337",0,1,0,8/30/16,8/30/16,9/20/16,11/10/16,1,72,72,,,72,NA,6,12/6/16,1,4,1,1 missing,5,1,1,1,1 missing,
21889,CC010,"335,336x337",0,1,0,8/30/16,8/30/16,9/20/16,12/2/16,2,94,94,,,NA,NA,5,12/27/16,3,2,0,,5,0,1,1,,
21889,CC010,"335,336x337",0,1,0,8/30/16,8/30/16,9/20/16,12/27/16,3,119,119,,,NA,NA,3,1/16/17,1,1,1,missing,2,1,1,1,missing,
21889,CC010,"335,336x337",0,1,0,8/30/16,8/30/16,9/20/16,2/25/17,4,179,179,,,NA,NA,1,NA,0,0,1,missing,0,1,1,0,missing,
21889,CC010,"335,336x337",0,1,0,8/30/16,8/30/16,9/20/16,3/5/17,5,187,187,,,NA,NA,5,NA,0,0,5,,0,5,1,0,,
21889,CC010,"335,336x337",0,1,0,8/30/16,8/30/16,9/20/16,3/19/17,6,201,201,,,NA,NA,2,4/11/17,0,1,1,,1,1,1,1,,
21889,CC010,"335,336x337",0,1,0,8/30/16,8/30/16,9/20/16,3/28/17,7,210,210,,,NA,NA,2,4/18/17,1,1,0,335 FD 3/22/17; 337 AH 4/17/17,2,0,1,1,335 FD 3/22/17; 337 AH 4/17/17,
21889,CC010,"338,339x340",0,1,0,8/2/16,8/2/16,10/11/16,11/3/16,1,93,93,,,93,NA,4,11/29/16,2,2,0,,4,0,1,1,,
21889,CC010,"338,339x340",0,1,0,8/2/16,8/2/16,10/11/16,12/22/16,2,142,142,,,NA,NA,5,1/12/17,0,3,2,,3,2,1,1,,
21889,CC010,"338,339x340",0,1,0,8/2/16,8/2/16,10/11/16,2/3/17,3,185,185,,,NA,NA,5,3/1/17,3,2,0,,5,0,1,1,,
21889,CC010,"338,339x340",0,1,0,8/2/16,8/2/16,10/11/16,2/20/17,4,202,202,,,NA,NA,2,3/14/17,2,0,0,,2,0,1,1,,
21889,CC010,"338,339x340",0,1,0,9/20/16,9/20/16,10/18/16,11/28/16,5,69,69,,,NA,NA,1,NA,0,0,1,missing,0,1,1,0,missing,
21889,CC010,"338,339x340",0,1,0,9/20/16,9/20/16,10/18/16,12/6/16,6,77,77,,,NA,NA,3,NA,0,0,3,missing,0,3,1,0,missing,
21889,CC010,"338,339x340",0,1,0,9/20/16,9/20/16,10/18/16,12/27/16,7,98,98,,,NA,NA,2,NA,0,0,2,missing,0,2,1,0,missing,
21889,CC010,"338,339x340",0,1,0,9/20/16,9/20/16,10/18/16,1/11/17,8,113,113,,,NA,NA,5,1/31/17,2,3,0,,5,0,1,1,,
21889,CC010,"338,339x340",0,1,0,9/20/16,9/20/16,10/18/16,1/16/17,9,118,118,,,NA,NA,4,2/21/17,2,2,0,,4,0,1,1,,
21889,CC010,"338,339x340",0,1,0,9/20/16,9/20/16,10/18/16,2/13/17,10,146,146,,,NA,NA,5,3/7/17,4,1,0,,5,0,1,1,,
21889,CC010,"338,339x340",0,1,0,9/20/16,9/20/16,10/18/16,2/27/17,11,160,160,,,NA,NA,2,3/21/17,1,1,0,,2,0,1,1,,
21889,CC010,"338,339x340",0,1,0,9/20/16,9/20/16,10/18/16,3/20/17,12,181,181,,,NA,NA,6,4/11/17,4,0,2,male 340 pulled 6/27/17,4,2,1,1,male 340 pulled 6/27/17,
21889,CC010,"344,345x346",0,1,0,9/20/16,9/20/16,10/18/16,11/27/16,1,68,68,,,68,NA,4,12/20/16,0,3,1,1 FD,3,1,1,1,1 FD,
21889,CC010,"344,345x346",0,1,0,9/20/16,9/20/16,10/18/16,12/4/16,2,75,75,,,NA,NA,6,12/27/16,2,4,0,,6,0,1,1,,
21889,CC010,"344,345x346",0,1,0,9/20/16,9/20/16,10/18/16,12/21/16,3,92,92,,,NA,NA,7,1/12/17,1,5,1,1 missing,6,1,1,1,1 missing,
21889,CC010,"344,345x346",0,1,0,9/20/16,9/20/16,10/18/16,1/12/17,4,114,114,,,NA,NA,8,1/31/17,6,2,0,,8,0,1,1,,
21889,CC010,"344,345x346",0,1,0,9/20/16,9/20/16,10/18/16,2/16/17,5,149,149,2/21/17,,NA,NA,6,3/14/17,3,3,0,,6,0,2,2,,
21889,CC010,"344,345x346",0,1,0,9/20/16,9/20/16,10/18/16,3/26/17,6,187,187,,,NA,NA,6,4/18/17,1,2,3,missing,3,3,1,1,missing,
21889,CC010,"344,345x346",0,1,0,9/20/16,9/20/16,10/18/16,5/11/17,7,233,233,,,NA,NA,3,NA,0,0,3,346 pulled 5/2/17,0,3,1,0,346 pulled 5/2/17,
21889,CC010,"347,348x349",0,1,0,9/20/16,9/20/16,10/18/16,11/28/16,1,69,69,,,69,NA,3,12/20/16,2,1,0,,3,0,1,1,,
21889,CC010,"350,351x352",0,1,0,10/4/16,10/4/16,11/9/16,12/21/16,1,78,78,12/24/16,,78,NA,7,1/12/17,4,3,0,,7,0,2,2,,
21889,CC010,"350,351x352",0,1,0,10/4/16,10/4/16,11/9/16,1/11/17,2,99,99,,,NA,NA,4,2/17/17,1,2,1,,3,1,1,1,,
21889,CC010,"350,351x352",0,1,0,10/4/16,10/4/16,11/9/16,1/31/17,3,119,119,,,NA,NA,2,3/1/17,2,0,0,,2,0,1,1,,
21889,CC010,"350,351x352",0,1,0,10/4/16,10/4/16,11/9/16,2/19/17,4,138,138,,,NA,NA,4,3/14/17,2,2,0,,4,0,1,1,,
21889,CC010,"350,351x352",0,1,0,10/4/16,10/4/16,11/9/16,3/15/17,5,162,162,,,NA,NA,4,4/11/17,2,2,0,,4,0,1,1,,
21889,CC010,"350,351x352",0,1,0,10/4/16,10/4/16,11/9/16,3/26/17,6,173,173,,,NA,NA,1,4/18/17,0,1,0,,1,0,1,1,,
21889,CC010,"350,351x352",0,1,0,10/4/16,10/4/16,11/9/16,4/5/17,7,183,183,,,NA,NA,3,4/28/17,0,2,1,male pulled 6/20/17,2,1,1,1,male pulled 6/20/17,
21889,CC010,"353,354x355",0,1,0,10/4/16,10/4/16,11/9/16,12/21/16,1,78,78,,,78,NA,10,1/12/17,1,6,3,3 missing,7,3,1,1,3 missing,
21889,CC010,"353,354x355",0,1,0,10/4/16,10/4/16,11/9/16,1/11/17,2,99,99,,,NA,NA,5,1/31/17,2,2,1,1 missing,4,1,1,1,1 missing,
21889,CC010,"353,354x355",0,1,0,10/4/16,10/4/16,11/9/16,1/14/17,3,102,102,,,NA,NA,1,2/17/17,1,0,0,,1,0,1,1,,
21889,CC010,"353,354x355",0,1,0,10/4/16,10/4/16,11/9/16,2/23/17,4,142,142,,,NA,NA,5,3/14/17,2,3,0,,5,0,1,1,,
21889,CC010,"353,354x355",0,1,0,10/4/16,10/4/16,11/9/16,3/22/17,5,169,169,,,NA,NA,1,NA,0,0,1,1 BD,0,1,1,0,1 BD,
21889,CC010,"356,357x358",0,1,0,10/11/16,10/11/16,11/9/16,12/26/16,1,76,76,12/31/16,,76,NA,8,1/16/17,3,4,1,,7,1,2,2,,
21889,CC010,"356,357x358",0,1,0,10/11/16,10/11/16,11/9/16,1/18/17,2,99,99,,,NA,NA,3,NA,0,0,3,missing,0,3,1,0,missing,
21889,CC010,"356,357x358",0,1,0,10/11/16,10/11/16,11/9/16,4/19/17,3,190,190,,,NA,NA,3,NA,0,0,3,missing,0,3,1,0,missing,
21889,CC010,"356,357x358",0,1,0,10/11/16,10/11/16,11/9/16,4/28/17,4,199,199,,,NA,NA,3,5/27/17,2,1,0,,3,0,1,1,,
21889,CC010,"359,360x361",0,1,0,11/1/16,11/1/16,11/29/16,1/4/17,1,64,64,,,64,NA,2,1/24/17,0,0,2,missing,0,2,1,0,missing,
21889,CC010,"359,360x361",0,1,0,11/1/16,11/1/16,11/29/16,2/3/17,2,94,94,,,NA,NA,1,2/21/17,0,0,1,missing,0,1,1,0,missing,
21889,CC010,"359,360x361",0,1,0,11/1/16,11/1/16,11/29/16,3/14/17,3,133,133,,,NA,NA,4,NA,0,0,4,1 FD; 3 missing,0,4,1,0,1 FD; 3 missing,
21889,CC010,"362,363x36",0,1,0,11/1/16,11/1/16,11/29/16,1/5/17,1,65,65,,,65,NA,5,1/31/17,1,1,3,3 missing,2,3,1,1,3 missing,
21889,CC010,"362,363x36",0,1,0,11/1/16,11/1/16,11/29/16,1/24/17,2,84,84,,,NA,NA,5,2/21/17,2,3,0,,5,0,1,1,,
21889,CC010,"362,363x36",0,1,0,11/1/16,11/1/16,11/29/16,3/11/17,3,130,130,,,NA,NA,2,4/11/17,0,1,1,1 FD,1,1,1,1,1 FD,
21889,CC010,"362,363x36",0,1,0,11/1/16,11/1/16,11/29/16,4/27/17,4,177,177,,,NA,NA,1,NA,0,0,1,1 BD; 362 with head tilt,0,1,1,0,1 BD; 362 with head tilt,
21889,CC010,"365,366x367",0,1,0,11/1/16,11/1/16,11/29/16,NA,1,NA,NA,,,NA,NA,0,NA,0,0,,,0,0,1,0,nonproductive,
21889,CC010,"368,369x370",0,1,0,11/29/16,11/29/16,12/20/16,2/4/17,1,67,67,,,67,NA,6,3/1/17,4,2,0,,6,0,1,1,,
21889,CC010,"368,369x370",0,1,0,11/29/16,11/29/16,12/20/16,3/1/17,2,92,92,,,NA,NA,2,3/28/17,1,1,0,,2,0,1,1,,
21889,CC010,"368,369x370",0,1,0,11/29/16,11/29/16,12/20/16,3/21/17,3,112,112,,,NA,NA,7,4/11/17,3,4,0,,7,0,1,1,,
21889,CC010,"368,369x370",0,1,0,11/29/16,11/29/16,12/20/16,6/7/17,4,190,190,,,NA,NA,1,6/28/17,0,0,1,missing,0,1,1,0,missing,
21889,CC010,"371,372x373",0,1,0,11/22/16,11/22/16,12/20/16,2/3/17,1,73,73,,,73,NA,5,3/7/17,3,2,0,,5,0,1,1,,
21889,CC010,"371,372x373",0,1,0,11/22/16,11/22/16,12/20/16,2/23/17,2,93,93,,,NA,NA,3,3/21/17,2,1,0,,3,0,1,1,,
21889,CC010,"371,372x373",0,1,0,11/22/16,11/22/16,12/20/16,3/1/17,3,99,99,,,NA,NA,2,3/28/17,1,1,0,,2,0,1,1,,
21889,CC010,"374,375x376",0,1,0,11/22/16,11/22/16,12/20/16,2/1/17,1,71,71,2/3/17,,71,NA,10,3/1/17,6,4,0,,10,0,2,2,,
21889,CC010,"374,375x376",0,1,0,11/22/16,11/22/16,12/20/16,3/2/17,2,100,100,,,NA,NA,6,3/28/17,3,2,1,,5,1,1,1,,
21889,CC010,"374,375x376",0,1,0,11/22/16,11/22/16,12/20/16,4/2/17,3,131,131,,,NA,NA,5,5/2/17,2,3,0,,5,0,1,1,,
21889,CC010,"374,375x376",0,1,0,11/22/16,11/22/16,12/20/16,4/20/17,4,149,149,,,NA,NA,4,5/16/17,2,2,0,,4,0,1,1,,
21889,CC010,"374,375x376",0,1,0,11/22/16,11/22/16,12/20/16,4/27/17,5,156,156,,,NA,NA,5,5/23/17,4,1,0,,5,0,1,1,,
21889,CC010,"374,375x376",0,1,0,11/22/16,11/22/16,12/20/16,5/12/17,6,171,171,,,NA,NA,4,6/6/17,3,1,0,,4,0,1,1,,
21889,CC010,"374,375x376",0,1,0,11/22/16,11/22/16,12/20/16,5/23/17,7,182,182,,,NA,NA,3,6/17/17,2,0,1,1 FD,2,1,1,1,1 FD,
21889,CC010,"374,375x376",0,1,0,11/22/16,11/22/16,12/20/16,6/6/17,8,196,196,,,NA,NA,3,6/27/17,0,2,1,,2,1,1,1,,
21889,CC010,"374,375x376",0,1,0,11/22/16,11/22/16,12/20/16,6/15/17,9,205,205,,,NA,NA,1,NA,0,0,1,missing,0,1,1,0,missing,
21889,CC010,"374,375x376",0,1,0,11/22/16,11/22/16,12/20/16,6/27/17,10,217,217,,,NA,NA,4,7/18/17,0,3,1,,3,1,1,1,,
21889,CC010,"374,375x376",0,1,0,11/22/16,11/22/16,12/20/16,7/21/17,11,241,241,,,NA,NA,2,NA,0,0,2,2BD; male pulled 7/18/17,0,2,1,0,2BD; male pulled 7/18/17,
21889,CC010,"377,378x379",0,1,0,11/27/16,11/27/16,12/27/16,NA,1,NA,NA,,,NA,NA,0,NA,0,0,,,0,0,1,0,nonproductive,
21889,CC010,"380,381x382",0,1,0,12/4/16,12/4/16,12/27/16,NA,1,NA,NA,,,NA,NA,0,NA,0,0,,,0,0,1,0,nonproductive,
21889,CC010,"383,384x385",0,1,0,12/6/16,12/6/16,1/12/17,NA,1,NA,NA,,,NA,NA,0,NA,0,0,,,0,0,1,0,nonproductive,
21889,CC010,"386,387x388",0,1,0,12/13/16,12/13/16,1/12/17,3/2/17,1,79,79,,,79,NA,3,3/28/17,2,1,0,,3,0,1,1,,
21889,CC010,"386,387x388",0,1,0,12/13/16,12/13/16,1/12/17,4/26/17,2,134,134,,,NA,NA,4,NA,0,0,4,388 ear infection 5/16/17,0,4,1,0,388 ear infection 5/16/17,
21889,CC010,389390X391,1,0,0,12/20/16,12/20/16,1/12/17,3/27/17,1,97,97,,,97,NA,5,4/18/17,2,2,NA,NA,4,1,1,1,male found dead 8/1/17,
21889,CC010,389390X391,1,0,0,12/20/16,12/20/16,1/12/17,4/12/17,2,113,113,,,NA,16,2,4/18/17,NA,NA,NA,NA,NA,NA,1,0,missing pups; male found dead 8/1/17,
21889,CC010,"392,393x394",0,1,0,12/20/16,12/20/16,1/12/17,3/3/17,1,73,73,,,73,NA,3,3/28/17,3,0,0,0,3,0,1,1,male  dead on 8/1/17,
21889,CC010,"392,393x394",0,1,0,12/20/16,12/20/16,1/12/17,3/28/17,2,98,98,,,NA,NA,4,4/18/17,0,4,0,0,4,0,1,1,male  dead on 8/1/17,
21889,CC010,"392,393x394",0,1,0,12/20/16,12/20/16,1/12/17,4/18/17,3,119,119,,,NA,NA,4,5/16/17,2,1,NA,NA,3,1,1,1,male  dead on 8/1/17,
21889,CC010,"392,393x394",0,1,0,12/20/16,12/20/16,1/12/17,5/1/17,4,132,132,,,NA,NA,2,5/21/17,1,1,0,0,2,0,1,1,male  dead on 8/1/17,
21889,CC010,"392,393x394",0,1,0,12/20/16,12/20/16,1/12/17,5/9/17,5,140,140,,,NA,NA,5,5/30/17,2,3,0,0,5,0,1,1,male  dead on 8/1/17,
21889,CC010,"392,393x394",0,1,0,12/20/16,12/20/16,1/12/17,5/24/17,6,155,155,,,NA,NA,2,6/13/17,1,1,0,0,2,0,1,1,male  dead on 8/1/17,
21889,CC010,"392,393x394",0,1,0,12/20/16,12/20/16,1/12/17,6/2/17,7,164,164,,,NA,NA,6,6/27/17,1,3,NA,NA,4,2,1,1,male  dead on 8/1/17; missing pup,
21889,CC010,"392,393x394",0,1,0,12/20/16,12/20/16,1/12/17,6/24/17,8,186,186,,,NA,NA,6,7/18/17,2,2,NA,NA,4,2,1,1,male  dead on 8/1/17; missing pup,
21889,CC010,"392,393x394",0,1,0,12/20/16,12/20/16,1/12/17,7/7/17,9,199,199,,,NA,NA,3,8/1/17,2,1,0,0,3,0,1,1,male  dead on 8/1/17,
21889,CC010,"392,393x394",0,1,0,12/20/16,12/20/16,1/12/17,7/18/17,10,210,210,,,NA,NA,3,8/8/17,1,1,NA,NA,2,1,1,1,male  dead on 8/1/17,
21889,CC010,"395,396x397",0,1,0,11/28/16,11/28/16,1/24/17,4/25/17,1,148,148,,,148,NA,4,5/23/17,1,2,1,395 with broken leg 2/16/17,3,1,1,1,395 with broken leg 2/16/17,
21889,CC010,398x399,1,0,0,11/29/16,11/29/16,1/24/17,NA,1,NA,NA,,,NA,NA,0,NA,0,0,,,0,0,1,0,nonproductive,
21889,CC010,"400,401x402",0,1,0,1/16/17,1/16/17,2/21/17,3/19/17,1,62,62,,,62,NA,4,4/11/17,0,3,,,3,1,1,1,,
21889,CC010,"400,401x402",0,1,0,1/16/17,1/16/17,2/21/17,3/20/17,2,63,63,,,NA,NA,2,4/18/17,2,0,,,2,0,1,1,,
21889,CC010,"400,401x402",0,1,0,1/16/17,1/16/17,2/21/17,4/2/17,3,76,76,,,NA,NA,4,4/27/17,2,2,,,4,0,1,1,,
21889,CC010,"400,401x402",0,1,0,1/16/17,1/16/17,2/21/17,4/12/17,4,86,86,,,NA,NA,3,NA,0,0,,,0,3,1,0,missing ,
21889,CC010,"403,404x405",0,1,0,1/24/17,1/24/17,2/21/17,5/15/17,1,111,111,,,111,NA,5,6/6/17,3,2,,,5,0,1,1,,
21889,CC010,"403,404x405",0,1,0,1/24/17,1/24/17,2/21/17,7/15/17,2,172,172,,,NA,NA,5,8/8/17,3,2,,,5,0,1,1,,
21889,CC010,"406,407x408",0,1,0,2/3/17,2/3/17,3/7/17,NA,1,NA,NA,,,NA,NA,0,NA,0,0,,,0,0,1,0,nonproductive,
21889,CC010,"409,410x411",0,1,0,2/13/17,2/13/17,3/7/17,4/20/17,1,66,66,,,66,NA,4,5/16/17,2,1,,,3,1,1,1,1 missing,
21889,CC010,"409,410x411",0,1,0,2/13/17,2/13/17,3/7/17,6/17/17,2,124,124,,,NA,NA,4,7/18/17,2,2,,,4,0,1,1,,
21889,CC010,"409,410x411",0,1,0,2/13/17,2/13/17,3/7/17,9/7/17,3,206,206,,,NA,NA,6,10/2/17,4,1,,,5,1,1,1,1 missing; 409 FD 5/11/17,
21889,CC010,"412,413x414",0,1,0,3/15/17,3/15/17,4/11/17,5/1/17,1,47,47,,,47,NA,4,5/31/17,3,1,,,4,0,1,1,,
21889,CC010,"412,413x414",0,1,0,3/15/17,3/15/17,4/11/17,5/25/17,2,71,71,5/27/17,,NA,NA,8,6/13/17,3,4,,,7,1,2,2,missing,
21889,CC010,"412,413x414",0,1,0,3/15/17,3/15/17,4/11/17,6/18/17,3,95,95,,,NA,NA,4,7/18/17,2,1,,,3,1,1,1,,
21889,CC010,"412,413x414",0,1,0,3/15/17,3/15/17,4/11/17,7/13/17,4,120,120,,,NA,NA,3,8/8/17,2,0,,,2,1,1,1,,
21889,CC010,"412,413x414",0,1,0,3/15/17,3/15/17,4/11/17,8/3/17,5,141,141,,,NA,NA,5,8/29/17,2,2,,,4,1,1,1,missing,
21889,CC010,"412,413x414",0,1,0,3/15/17,3/15/17,4/11/17,8/20/17,6,158,158,8/24/17,,NA,NA,6,9/29/17,2,4,,,6,0,2,2,,
21889,CC010,"412,413x414",0,1,0,3/15/17,3/15/17,4/11/17,9/10/17,7,179,179,,,NA,NA,2,10/10/17,1,1,,,2,0,1,1,,
21889,CC010,"412,413x414",0,1,0,3/15/17,3/15/17,4/11/17,9/18/17,8,187,187,,,NA,NA,1,10/10/17,0,1,,,1,0,1,1,,
21889,CC010,"412,413x414",0,1,0,3/15/17,3/15/17,4/11/17,10/8/17,9,207,207,,,NA,NA,7,11/6/17,2,3,,,5,2,1,1,missing,
21889,CC010,"412,413x414",0,1,0,3/15/17,3/15/17,4/11/17,11/2/17,10,232,232,,,NA,NA,2,NA,NA,NA,,,NA,0,1,0,414 pulled 10/31/17,
21889,CC010,"415,416x417",0,1,0,4/2/17,4/2/17,4/27/17,6/12/17,1,71,71,,,71,NA,7,7/18/17,0,2,,,2,5,1,1,3 missing,
21889,CC010,"415,416x417",0,1,0,4/2/17,4/2/17,4/27/17,8/23/17,2,143,143,,,NA,NA,3,NA,0,0,,,0,3,1,0,missing,
21889,CC010,"415,416x417",0,1,0,4/2/17,4/2/17,4/27/17,9/15/17,3,166,166,,,NA,NA,3,10/10/17,0,2,,,2,1,1,1,missing,
21889,CC010,"415,416x417",0,1,0,4/2/17,4/2/17,4/27/17,10/1/17,4,182,182,,,NA,NA,4,10/24/17,1,3,,,4,0,1,1,,
21890,CC010,"418,419x420",0,1,0,4/2/17,4/2/17,5/2/17,5/21/17,1,49,49,,,49,NA,6,6/13/17,2,4,,,6,0,1,1,,
21889,CC010,"421,422x423",0,1,0,4/20/17,4/20/17,5/16/17,6/25/17,1,66,66,,,66,NA,4,7/18/17,4,0,,,4,0,1,1,,
21889,CC010,"421,422x423",0,1,0,4/20/17,4/20/17,5/16/17,7/18/17,2,89,89,,,NA,NA,4,8/8/17,2,0,,,2,2,1,1,missing ,
21889,CC010,"424,425x426",0,1,0,4/18/17,4/18/17,5/16/17,6/29/17,1,72,72,,,72,NA,11,7/18/17,4,3,,,7,4,1,1,missing,
21889,CC010,"424,425x426",0,1,0,4/18/17,4/18/17,5/16/17,7/20/17,2,93,93,,,NA,NA,4,8/15/17,0,4,,,4,0,1,1,,
21889,CC010,"424,425x426",0,1,0,4/18/17,4/18/17,5/16/17,8/15/17,3,119,119,,,NA,NA,4,9/6/17,1,2,,,3,1,1,1,,
21889,CC010,"424,425x426",0,1,0,4/18/17,4/18/17,5/16/17,9/6/17,4,141,141,,,NA,NA,5,10/3/17,3,1,,,4,1,1,1,,
21889,CC010,"424,425x426",0,1,0,4/18/17,4/18/17,5/16/17,10/2/17,5,167,167,,,NA,NA,5,10/24/17,0,4,,,4,1,1,1,,
21889,CC010,"424,425x426",0,1,0,4/18/17,4/18/17,5/16/17,10/26/17,6,191,191,,,NA,NA,7,11/20/17,2,4,,,6,1,1,1,1 FD,
21889,CC010,"424,425x426",0,1,0,4/18/17,4/18/17,5/16/17,11/22/17,7,218,218,,,NA,NA,2,12/12/17,0,0,,,0,2,1,0,missing; 424 FD 8/17/17; 426 pulled 12/12/17,
21890,CC010,"427,428x429",0,1,0,4/18/17,4/18/17,5/16/17,6/26/17,1,69,69,6/27/17,,69,NA,12,7/18/17,3,7,,,10,2,2,2,,
21890,CC010,"427,428x429",0,1,0,4/18/17,4/18/17,5/16/17,7/20/17,2,93,93,7/22/17,,NA,NA,8,8/15/17,3,5,,,8,0,2,2,,
21889,CC010,"430,431x432",0,1,0,4/27/17,4/27/17,5/31/17,7/6/17,1,70,70,,,70,NA,4,8/1/17,1,3,,,4,0,1,1,,
21889,CC010,"430,431x432",0,1,0,4/27/17,4/27/17,5/31/17,7/25/17,2,89,89,7/27/17,,NA,NA,6,8/15/17,3,3,,,6,0,2,2,,
21889,CC010,"430,431x432",0,1,0,4/27/17,4/27/17,5/31/17,8/17/17,3,112,112,,,NA,NA,3,9/6/17,0,0,,,0,3,1,0,1 BD; 1 missing,
21889,CC010,"430,431x432",0,1,0,4/27/17,4/27/17,5/31/17,8/19/17,4,114,114,,,NA,NA,6,9/25/17,5,1,,,6,0,1,1,,
21889,CC010,"430,431x432",0,1,0,4/27/17,4/27/17,5/31/17,9/8/17,5,134,134,,,NA,NA,3,10/10/17,1,1,,,2,1,1,1,,
21889,CC010,"430,431x432",0,1,0,4/27/17,4/27/17,5/31/17,10/1/17,6,157,157,,,NA,NA,4,10/24/17,4,0,,,4,0,1,1,432 pulled 12/26/17,
21889,CC010,"433,434x435",0,1,0,5/10/17,5/10/17,5/31/17,7/29/17,1,80,80,,,80,NA,7,8/22/17,3,4,,,7,0,1,1,,
21889,CC010,"433,434x435",0,1,0,5/10/17,5/10/17,5/31/17,11/20/17,2,194,194,,,NA,NA,4,NA,0,0,,,0,4,1,0,2 FD; 2 missing,
21889,CC010,"433,434x435",0,1,0,5/10/17,5/10/17,5/31/17,12/13/17,3,217,217,,,NA,NA,2,NA,0,0,,,0,2,1,0,1 BD; 1 missing; 433 missing on 10/3/17,
21889,CC010,"436,437x438",0,1,0,5/9/17,5/9/17,5/31/17,7/14/17,1,66,66,,,66,NA,3,8/8/17,0,3,,,3,0,1,1,,
21889,CC010,"436,437x438",0,1,0,5/9/17,5/9/17,5/31/17,7/24/17,2,76,76,,,NA,NA,4,8/15/17,2,1,,,3,1,1,1,,
21889,CC010,"436,437x438",0,1,0,5/9/17,5/9/17,5/31/17,8/7/17,3,90,90,,,NA,NA,3,8/29/17,2,1,,,3,0,1,1,,
21889,CC010,"436,437x438",0,1,0,5/9/17,5/9/17,5/31/17,8/17/17,4,100,100,,,NA,NA,2,9/6/17,2,0,,,2,0,1,1,,
21889,CC010,"436,437x438",0,1,0,5/9/17,5/9/17,5/31/17,8/29/17,5,112,112,,,NA,NA,3,9/29/17,0,2,,,2,1,1,1,,
21889,CC010,"436,437x438",0,1,0,5/9/17,5/9/17,5/31/17,9/7/17,6,121,121,,,NA,NA,3,9/29/17,1,2,,,3,0,1,1,,
21889,CC010,"436,437x438",0,1,0,5/9/17,5/9/17,5/31/17,9/20/17,7,134,134,,,NA,NA,4,10/10/17,1,3,,,4,0,1,1,,
21889,CC010,"436,437x438",0,1,0,5/9/17,5/9/17,5/31/17,10/20/17,8,164,164,,,NA,NA,5,11/14/17,5,0,,,5,0,1,1,,
21889,CC010,"436,437x438",0,1,0,5/9/17,5/9/17,5/31/17,10/29/17,9,173,173,,,NA,NA,3,11/20/17,3,1,,,4,-1,1,1,,
21889,CC010,"436,437x438",0,1,0,5/9/17,5/9/17,5/31/17,11/14/17,10,189,189,,,NA,NA,3,12/5/17,2,1,,,3,0,1,1,,
21889,CC010,"436,437x438",0,1,0,5/9/17,5/9/17,5/31/17,12/7/17,11,212,212,,,NA,NA,2,NA,0,0,,,0,2,1,0,1 missing,
21889,CC010,"436,437x438",0,1,0,5/9/17,5/9/17,5/31/17,12/13/17,12,218,218,,,NA,NA,2,1/9/18,0,1,,,1,1,1,1,,
21889,CC010,"436,437x438",0,1,0,5/9/17,5/9/17,5/31/17,12/26/17,13,231,231,,,NA,NA,5,NA,NA,NA,,,NA,0,1,0,,
21889,CC010,"439,440x441",0,1,0,5/1/17,5/1/17,5/31/17,7/16/17,1,76,76,,,76,NA,3,8/8/17,3,0,,,3,0,1,1,,
21889,CC010,"439,440x441",0,1,0,5/1/17,5/1/17,5/31/17,7/27/17,2,87,87,,,NA,NA,7,8/15/17,2,4,,,6,1,1,1,,
21889,CC010,"439,440x441",0,1,0,5/1/17,5/1/17,5/31/17,8/15/17,3,106,106,,,NA,NA,5,9/6/17,2,2,,,4,1,1,1,1 missing,
21889,CC010,"439,440x441",0,1,0,5/1/17,5/1/17,5/31/17,8/20/17,4,111,111,,,NA,NA,6,9/29/17,3,3,,,6,0,1,1,,
21889,CC010,"439,440x441",0,1,0,5/1/17,5/1/17,5/31/17,10/6/17,5,158,158,,,NA,NA,6,10/31/17,3,3,,,6,0,1,1,,
21889,CC010,"439,440x441",0,1,0,5/1/17,5/1/17,5/31/17,11/24/17,6,207,207,,,NA,NA,8,12/12/17,3,3,,,6,2,1,1,,
21889,CC010,442x443,1,0,0,6/2/17,6/2/17,6/27/17,8/10/17,1,69,69,,,69,NA,4,9/6/17,2,1,,,3,1,1,1,1 FD,
21889,CC010,442x443,1,0,0,6/2/17,6/2/17,6/27/17,10/8/17,2,128,128,,,NA,59,3,10/31/17,1,2,,,3,0,1,1,,
21889,CC010,"444,445x446",0,1,0,6/17/17,6/17/17,7/18/17,8/3/17,1,47,47,,,47,NA,10,8/29/17,4,2,,,6,4,1,1,4 missing; 444 FD 8/29/17,
21889,CC010,"447,448x449",0,1,0,6/18/17,6/18/17,7/18/17,8/27/17,1,70,70,,,70,NA,4,10/?/17,1,1,,,2,2,1,1,"1 FD, 1 missing",
21889,CC010,"447,448x449",0,1,0,6/18/17,6/18/17,7/18/17,9/8/17,2,82,82,,,NA,NA,5,10/3/17,2,3,,,5,0,1,1,,
21889,CC010,"447,448x449",0,1,0,6/18/17,6/18/17,7/18/17,10/3/17,3,107,107,,,NA,NA,5,10/24/17,1,2,,,3,2,1,1,2 missing,
21889,CC010,"447,448x449",0,1,0,6/18/17,6/18/17,7/18/17,11/24/17,4,159,159,,,NA,NA,3,12/19/17,0,2,,,2,1,1,1,,
21889,CC010,"447,448x449",0,1,0,6/18/17,6/18/17,7/18/17,12/16/17,5,181,181,,,NA,NA,6,1/9/18,1,5,,,6,0,1,1,,
21889,CC010,"450,451x452",0,1,0,6/27/17,6/27/17,7/18/17,9/7/17,1,72,72,,,72,NA,4,10/3/17,0,1,,,1,3,1,1,3 missing; 450 FD 9/28/17,
21890,CC010,"453,454x455",0,1,0,6/24/17,6/24/17,7/18/17,NA,1,NA,NA,,,NA,NA,0,NA,0,0,,,0,0,1,0,nonproductive,
21889,CC010,"456,457x458",0,1,0,7/4/17,7/4/17,8/1/17,9/20/17,1,78,78,,,78,NA,5,10/10/17,1,2,NA,NA,3,2,1,1,male pulled on 1/29/18; 2 missing,
21889,CC010,"456,457x458",0,1,0,7/4/17,7/4/17,8/1/17,10/4/17,2,92,92,,,NA,NA,6,10/31/17,3,3,0,0,6,0,1,1,male pulled on 1/29/18,
21889,CC010,459x460,1,0,0,7/4/17,7/4/17,8/1/17,NA,1,NA,NA,,,NA,NA,0,NA,0,0,,,0,0,1,0,459 pulled 10/26/17,
21889,CC010,"461,462x463",0,1,0,7/29/17,7/29/17,8/22/17,9/20/17,1,53,53,,,53,NA,2,10/24/17,2,0,,,2,0,1,1,,
21889,CC010,"461,462x463",0,1,0,7/29/17,7/29/17,8/22/17,10/15/17,2,78,78,10/22/17,,NA,NA,9,11/14/18,2,6,,,8,1,2,2,,
21889,CC010,"461,462x463",0,1,0,7/29/17,7/29/17,8/22/17,12/30/17,3,154,154,,,NA,NA,3,1/22/18,2,1,,,3,0,1,1,,
21889,CC010,"461,462x463",0,1,0,7/29/17,7/29/17,8/22/17,1/7/18,4,162,162,,,NA,NA,1,2/6/18,0,1,,,1,0,1,1,,
21889,CC010,"461,462x463",0,1,0,7/29/17,7/29/17,8/22/17,1/21/18,5,176,176,,,NA,NA,1,2/20/18,1,0,,,1,0,1,1,male pulled 2/20/18,
21889,CC010,464x465,1,0,0,7/29/17,7/29/17,8/22/17,11/16/17,1,110,110,,,110,NA,2,12/5/17,1,0,NA,NA,1,1,1,1,1 found dead,
21889,CC010,464x465,1,0,0,7/29/17,7/29/17,8/22/17,1/5/18,2,160,160,,,NA,50,2,NA,NA,NA,NA,NA,NA,NA,1,0,born dead,
21889,CC010,"466,467x468",0,1,0,8/10/17,8/10/17,9/6/17,10/18/17,1,69,69,,,69,NA,6,11/6/17,2,3,,,5,1,1,1,1 missing,
21889,CC010,"466,467x468",0,1,0,8/10/17,8/10/17,9/6/17,10/30/17,2,81,81,,,NA,NA,4,11/20/17,1,0,,,1,3,1,1,3 missing,
21889,CC010,"466,467x468",0,1,0,8/10/17,8/10/17,9/6/17,1/23/18,3,166,166,,,NA,NA,2,2/6/18,0,0,,,0,2,1,0,1 BD; 1 missing,
21889,CC010,"466,467x468",0,1,0,8/10/17,8/10/17,9/6/17,2/15/18,4,189,189,,,NA,NA,3,3/12/18,0,0,,,0,3,1,0,missing,
21889,CC010,"469,470x471",0,1,0,8/15/17,8/15/17,9/6/17,10/13/17,1,59,59,,,59,NA,3,NA,0,0,3,missing,0,3,1,0,missing,
21889,CC010,"469,470x471",0,1,0,8/15/17,8/15/17,9/6/17,10/16/17,2,62,62,,,NA,NA,7,11/14/17,3,4,0,,7,0,1,1,,
21889,CC010,"469,470x471",0,1,0,8/15/17,8/15/17,9/6/17,11/6/17,3,83,83,,,NA,NA,3,NA,0,1,2,2 missing; no wean date on card,1,2,1,1,2 missing; no wean date on card,
21889,CC010,"469,470x471",0,1,0,8/15/17,8/15/17,9/6/17,11/11/17,4,88,88,,,NA,NA,2,12/5/17,1,0,1,,1,1,1,1,,
21889,CC010,"469,470x471",0,1,0,8/15/17,8/15/17,9/6/17,11/28/17,5,105,105,11/29/17,,NA,NA,7,12/19/17,3,3,1,1 missing,6,1,2,2,1 missing,
21889,CC010,"469,470x471",0,1,0,8/15/17,8/15/17,9/6/17,12/6/17,6,113,113,,,NA,NA,5,12/26/17,2,2,1,1 missing,4,1,1,1,1 missing,
21889,CC010,"469,470x471",0,1,0,8/15/17,8/15/17,9/6/17,12/24/17,7,131,131,,,NA,NA,3,1/16/18,2,0,1,1 missing,2,1,1,1,1 missing,
21889,CC010,"469,470x471",0,1,0,8/15/17,8/15/17,9/6/17,12/30/17,8,137,137,,,NA,NA,2,1/22/18,1,1,0,,2,0,1,1,,
21889,CC010,"469,470x471",0,1,0,8/15/17,8/15/17,9/6/17,1/12/18,9,150,150,,,NA,NA,4,2/6/18,2,2,0,,4,0,1,1,,
21889,CC010,"469,470x471",0,1,0,8/15/17,8/15/17,9/6/17,1/22/18,10,160,160,,,NA,NA,4,2/20/18,2,2,0,,4,0,1,1,,
21889,CC010,"469,470x471",0,1,0,8/15/17,8/15/17,9/6/17,2/7/18,11,176,176,,,NA,NA,6,3/12/18,5,0,1,1 missing,5,1,1,1,1 missing,
21889,CC010,"469,470x471",0,1,0,8/15/17,8/15/17,9/6/17,2/26/18,12,195,195,,,NA,NA,3,3/27/18,3,0,0,,3,0,1,1,,
21889,CC010,"469,470x471",0,1,0,8/15/17,8/15/17,9/6/17,3/12/18,13,209,209,,,NA,NA,6,4/2/18,1,3,2,2 missing,4,2,1,1,2 missing,
21889,CC010,"469,470x471",0,1,0,8/15/17,8/15/17,9/6/17,3/25/18,14,222,222,,,NA,NA,1,4/17/18,1,0,0,,1,0,1,1,,
21889,CC010,"469,470x471",0,1,0,8/15/17,8/15/17,9/6/17,4/1/18,15,229,229,,,NA,NA,5,NA,0,0,5,missing,0,5,1,0,missing,
21889,CC010,"472,473x474",0,1,0,9/7/17,9/7/17,10/3/17,12/9/17,1,93,93,12/14/17,,93,NA,7,1/9/18,4,3,,,7,0,2,2,,
21889,CC010,"472,473x474",0,1,0,9/7/17,9/7/17,10/3/17,2/11/18,2,157,157,2/17/18,,NA,NA,7,3/12/18,1,5,,,6,1,2,2,1 missing,
21889,CC010,"475,476x477",0,1,0,9/6/17,9/6/17,10/3/17,11/20/17,1,75,75,,,75,NA,5,12/19/17,1,3,,,4,1,1,1,1 missing,
21889,CC010,478x479,1,0,0,8/27/17,8/27/17,10/3/17,10/21/17,1,55,55,,,55,NA,4,11/14/17,0,3,,,3,1,1,1,1 missing,
21889,CC010,478x479,1,0,0,8/27/17,8/27/17,10/3/17,11/14/17,2,79,79,,,NA,24,3,12/5/17,3,0,,,3,0,1,1,,
21889,CC010,478x479,1,0,0,8/27/17,8/27/17,10/3/17,12/6/17,3,101,101,,,NA,22,6,12/28/17,4,1,,,5,1,1,1,,
21889,CC010,478x479,1,0,0,8/27/17,8/27/17,10/3/17,12/29/17,4,124,124,,,NA,23,5,1/16/18,2,3,,,5,0,1,1,,
21889,CC010,"480,481x482",0,1,0,9/8/17,9/8/17,10/3/17,11/14/17,1,67,67,,,67,NA,3,12/5/17,1,1,,,2,1,1,1,,
21889,CC010,"480,481x482",0,1,0,9/8/17,9/8/17,10/3/17,12/7/17,2,90,90,,,NA,NA,3,12/26/17,3,0,,,3,0,1,1,,
21889,CC010,"480,481x482",0,1,0,9/8/17,9/8/17,10/3/17,1/2/18,3,116,116,,,NA,NA,3,1/29/18,2,1,,,3,0,1,1,,
21889,CC010,"480,481x482",0,1,0,9/8/17,9/8/17,10/3/17,1/24/18,4,138,138,,,NA,NA,2,2/20/18,1,1,,,2,0,1,1,,
21889,CC010,"480,481x482",0,1,0,9/8/17,9/8/17,10/3/17,2/14/18,5,159,159,,,NA,NA,2,3/12/18,1,1,,,2,0,1,1,,
21889,CC010,"483,484x485",0,1,0,10/3/17,10/3/17,10/24/17,12/6/17,1,64,64,12/8/17,,64,NA,11,12/26/17,4,6,,,10,1,2,2,,
21889,CC010,"483,484x485",0,1,0,10/3/17,10/3/17,10/24/17,1/20/18,2,109,109,1/24/18,,NA,NA,3,2/20/18,2,1,,,3,0,2,2,,
21889,CC010,"483,484x485",0,1,0,10/3/17,10/3/17,10/24/17,2/12/18,3,132,132,2/14/18,,NA,NA,10,3/12/18,5,4,,,9,1,2,2,,
21889,CC010,"483,484x485",0,1,0,10/3/17,10/3/17,10/24/17,3/7/18,4,155,155,,,NA,NA,2,3/27/18,0,0,,,0,2,1,0,,
21889,CC010,"483,484x485",0,1,0,10/3/17,10/3/17,10/24/17,3/29/18,5,177,177,,,NA,NA,6,4/23/18,3,3,,,6,0,1,1,,
21889,CC010,"483,484x485",0,1,0,10/3/17,10/3/17,10/24/17,4/20/18,6,199,199,,,NA,NA,3,5/15/18,2,0,,,2,1,1,1,,
21889,CC010,"486,487x488",0,1,0,10/3/17,10/3/17,10/24/17,12/7/17,1,65,65,,,65,NA,8,12/26/17,1,3,,,4,4,1,1,4 missing,
21889,CC010,"486,487x488",0,1,0,10/3/17,10/3/17,10/24/17,12/27/17,2,85,85,,,NA,NA,3,1/16/18,1,2,,,3,0,1,1,,
21889,CC010,"486,487x488",0,1,0,10/3/17,10/3/17,10/24/17,1/17/18,3,106,106,,,NA,NA,5,2/20/18,1,2,,,3,2,1,1,2 FD,
21889,CC010,"486,487x488",0,1,0,10/3/17,10/3/17,10/24/17,2/7/18,4,127,127,,,NA,NA,5,3/12/18,3,1,,,4,1,1,1,,
21889,CC010,"486,487x488",0,1,0,10/3/17,10/3/17,10/24/17,3/5/18,5,153,153,,,NA,NA,2,NA,0,0,,,0,2,1,0,2 FD,
21889,CC010,"489,490x491",0,1,0,10/3/17,10/3/17,10/24/17,12/19/17,1,77,77,12/20/17,,77,NA,12,1/16/18,5,7,,,12,0,2,2,,
21889,CC010,"489,490x491",0,1,0,10/3/17,10/3/17,10/24/17,2/9/18,2,129,129,,,NA,NA,1,NA,0,0,,,0,1,1,0,1 FD,
21889,CC010,"489,490x491",0,1,0,10/3/17,10/3/17,10/24/17,3/5/18,3,153,153,,,NA,NA,5,3/27/18,4,1,,,5,0,1,1,,
21889,CC010,"489,490x491",0,1,0,10/3/17,10/3/17,10/24/17,3/16/18,4,164,164,,,NA,NA,2,4/10/18,1,1,,,2,0,1,1,,
21889,CC010,"492,493x494",0,1,0,10/3/17,10/3/17,10/24/17,12/1/17,1,59,59,12/8/17,,59,NA,6,12/26/17,4,2,,,6,0,2,2,,
21889,CC010,"492,493x494",0,1,0,10/3/17,10/3/17,10/24/17,12/25/17,2,83,83,,,NA,NA,7,1/16/18,3,3,,,6,1,1,1,,
21889,CC010,"492,493x494",0,1,0,10/3/17,10/3/17,10/24/17,1/1/18,3,90,90,,,NA,NA,4,1/29/18,0,3,,,3,1,1,1,,
21889,CC010,"492,493x494",0,1,0,10/3/17,10/3/17,10/24/17,3/27/18,4,175,175,,,NA,NA,8,4/23/18,3,3,,,6,2,1,1,,
21889,CC010,"492,493x494",0,1,0,10/3/17,10/3/17,10/24/17,4/18/18,5,197,197,,,NA,NA,5,5/15/18,2,3,,,5,0,1,1,,
21889,CC010,"492,493x494",0,1,0,10/3/17,10/3/17,10/24/17,5/10/18,6,219,219,,,NA,NA,2,6/5/18,0,2,,,2,0,1,1,,
21889,CC010,"492,493x494",0,1,0,10/3/17,10/3/17,10/24/17,6/1/18,7,241,241,,,NA,NA,5,6/26/18,2,2,,,4,1,1,1,,
21889,CC010,"495,496x497",0,1,0,10/6/17,10/6/17,10/31/17,12/13/17,1,68,68,,,68,NA,3,NA,0,0,,,0,3,1,0,2 missing,
21889,CC010,"495,496x497",0,1,0,10/6/17,10/6/17,10/31/17,12/19/17,2,74,74,,,NA,NA,6,1/9/18,3,3,,,6,0,1,1,,
21889,CC010,"495,496x497",0,1,0,10/6/17,10/6/17,10/31/17,1/5/18,3,91,91,,,NA,NA,4,1/29/18,0,3,,,3,1,1,1,1 FD,
21889,CC010,"495,496x497",0,1,0,10/6/17,10/6/17,10/31/17,1/11/18,4,97,97,,,NA,NA,5,2/6/18,2,3,,,5,0,1,1,,
21889,CC010,"495,496x497",0,1,0,10/6/17,10/6/17,10/31/17,1/26/18,5,112,112,,,NA,NA,4,2/20/18,1,3,,,4,0,1,1,,
21889,CC010,"495,496x497",0,1,0,10/6/17,10/6/17,10/31/17,2/7/18,6,124,124,,,NA,NA,7,3/6/18,4,1,,,5,2,1,1,2 missing,
21889,CC010,"495,496x497",0,1,0,10/6/17,10/6/17,10/31/17,3/11/18,7,156,156,,,NA,NA,3,4/2/18,2,1,,,3,0,1,1,,
21889,CC010,"495,496x497",0,1,0,10/6/17,10/6/17,10/31/17,4/2/18,8,178,178,,,NA,NA,7,4/23/18,3,3,,,6,1,1,1,,
21889,CC010,"495,496x497",0,1,0,10/6/17,10/6/17,10/31/17,4/12/18,9,188,188,,,NA,NA,3,5/15/18,0,3,,,3,0,1,1,,
21889,CC010,"495,496x497",0,1,0,10/6/17,10/6/17,10/31/17,5/17/18,10,223,223,,,NA,NA,4,6/5/18,3,0,,,3,1,1,1,,
21889,CC010,"495,496x497",0,1,0,10/6/17,10/6/17,10/31/17,5/30/18,11,236,236,,,NA,NA,4,6/19/18,3,1,,,4,0,1,1,497 pulled 6/19/18,
21889,CC010,498x499,1,0,0,10/6/17,10/6/17,10/31/17,12/29/17,1,84,84,,,84,NA,7,1/16/18,4,3,,,7,0,1,1,,
21889,CC010,498x499,1,0,0,10/6/17,10/6/17,10/31/17,2/19/18,2,136,136,,,NA,52,6,3/12/18,1,3,,,4,2,1,1,2 missing,
21889,CC010,498x499,1,0,0,10/6/17,10/6/17,10/31/17,4/5/18,3,181,181,,,NA,45,4,4/23/18,2,2,,,4,0,1,1,,
21889,CC010,498x499,1,0,0,10/6/17,10/6/17,10/31/17,5/16/18,4,222,222,,,NA,41,6,6/5/18,3,2,,,5,1,1,1,1 female escaped,
21889,CC010,"500,501x502",0,1,0,10/4/17,10/4/17,10/31/17,12/16/17,1,73,73,,,73,NA,4,1/9/18,1,2,,,3,1,1,1,,
21889,CC010,"500,501x502",0,1,0,10/4/17,10/4/17,10/31/17,1/2/18,2,90,90,,,NA,NA,1,1/22/18,0,1,,,1,0,1,1,,
21889,CC010,"500,501x502",0,1,0,10/4/17,10/4/17,10/31/17,1/9/18,3,97,97,,,NA,NA,4,2/6/18,2,2,,,4,0,1,1,,
21889,CC010,"500,501x502",0,1,0,10/4/17,10/4/17,10/31/17,2/24/18,4,143,143,,,NA,NA,3,3/20/18,2,1,,,3,0,1,1,,
21889,CC010,503x504,1,0,0,10/4/17,10/4/17,10/31/17,NA,1,NA,NA,,,NA,NA,0,NA,0,0,,,0,0,1,0,504 missing 12/20/17,
21889,CC010,505x506,1,0,0,10/8/17,10/8/17,10/31/17,12/27/17,1,80,80,,,80,NA,4,1/16/18,1,1,,,2,2,1,1,1 born dead,
21889,CC010,"507,508x509",0,1,0,10/24/17,10/24/17,11/29/17,1/3/18,1,71,71,,,71,NA,7,1/29/18,3,4,0,,7,0,1,1,,
21889,CC010,"507,508x509",0,1,0,10/24/17,10/24/17,11/29/17,1/26/18,2,94,94,,,NA,NA,5,2/20/18,1,3,1,,4,1,1,1,,
21889,CC010,"507,508x509",0,1,0,10/24/17,10/24/17,11/29/17,3/6/18,3,133,133,,,NA,NA,6,3/27/18,1,5,0,,6,0,1,1,,
21889,CC010,"507,508x509",0,1,0,10/24/17,10/24/17,11/29/17,5/17/18,4,205,205,,,NA,NA,2,NA,0,0,2,1 BD,0,2,1,0,1 BD,
21889,CC010,"510,511x512",0,1,0,10/31/17,10/31/17,11/29/17,1/10/18,1,71,71,,,71,NA,8,2/6/18,2,6,0,,8,0,1,1,,
21889,CC010,"510,511x512",0,1,0,10/31/17,10/31/17,11/29/17,2/5/18,2,97,97,,,NA,NA,5,2/26/18,3,2,0,,5,0,1,1,,
21889,CC010,"510,511x512",0,1,0,10/31/17,10/31/17,11/29/17,3/22/18,3,142,142,,,NA,NA,5,4/10/18,1,4,0,,5,0,1,1,,
21889,CC010,"510,511x512",0,1,0,10/31/17,10/31/17,11/29/17,4/12/18,4,163,163,,,NA,NA,7,5/1/18,2,5,0,,7,0,1,1,,
21889,CC010,"510,511x512",0,1,0,10/31/17,10/31/17,11/29/17,4/16/18,5,167,167,,,NA,NA,1,NA,0,0,1,missing,0,1,1,0,missing,
21889,CC010,"510,511x512",0,1,0,10/31/17,10/31/17,11/29/17,7/3/18,6,245,245,,,NA,NA,5,7/31/18,0,2,3,1 missing,2,3,1,1,1 missing,
21889,CC010,"510,511x512",0,1,0,10/31/17,10/31/17,11/29/17,7/25/18,7,267,267,,,NA,NA,2,NA,0,0,2,,0,2,1,0,,
21889,CC010,"513,514x515",0,1,0,11/24/17,11/24/17,12/12/17,1/30/18,1,67,67,,,67,NA,4,2/20/18,2,0,,,2,2,1,1,,
21889,CC010,"513,514x515",0,1,0,11/24/17,11/24/17,12/12/17,2/15/18,2,83,83,,,NA,NA,5,3/6/18,3,1,,,4,1,1,1,missing,
21889,CC010,"513,514x515",0,1,0,11/24/17,11/24/17,12/12/17,2/20/18,3,88,88,,,NA,NA,2,3/12/18,0,1,,,1,1,1,1,missing,
21889,CC010,"516,517x518",0,1,0,11/24/17,11/24/17,12/12/17,1/25/18,1,62,62,,,62,NA,1,NA,0,0,1,missing,0,1,1,0,missing,
21889,CC010,"516,517x518",0,1,0,11/24/17,11/24/17,12/12/17,2/15/18,2,83,83,,,NA,NA,2,3/12/18,0,1,1,,1,1,1,1,,
21889,CC010,"516,517x518",0,1,0,11/24/17,11/24/17,12/12/17,3/10/18,3,106,106,,,NA,NA,5,4/3/18,0,5,0,,5,0,1,1,,
21889,CC010,"516,517x518",0,1,0,11/24/17,11/24/17,12/12/17,5/18/18,4,175,175,,,NA,NA,7,NA,0,0,7,7 BD,0,7,1,0,7 BD,
21889,CC010,"516,517x518",0,1,0,11/24/17,11/24/17,12/12/17,6/9/18,5,197,197,,,NA,NA,2,NA,0,0,2,1 missing; 1 runt,0,2,1,0,1 missing; 1 runt,
21889,CC010,"516,517x518",0,1,0,11/24/17,11/24/17,12/12/17,7/3/18,6,221,221,,,NA,NA,2,NA,0,0,2,missing; 516 FD 8/2/18,0,2,1,0,missing; 516 FD 8/2/18,
21889,CC010,519x520,1,0,0,12/16/17,12/16/17,1/9/18,NA,1,NA,NA,,,NA,NA,0,NA,0,0,,,0,0,1,0,nonproductive,
21889,CC010,"521,522x523",0,1,0,12/12/17,12/12/17,1/9/18,NA,1,NA,NA,,,NA,NA,0,NA,0,0,,,0,0,1,0,nonproductive,
21889,CC010,"524,525x526",0,1,0,12/12/17,12/12/17,1/9/18,2/14/18,1,64,64,,,64,NA,4,3/6/18,3,1,0,,4,0,1,1,,
21889,CC010,"524,525x526",0,1,0,12/12/17,12/12/17,1/9/18,2/22/18,2,72,72,,,NA,NA,4,3/20/18,2,2,0,,4,0,1,1,,
21889,CC010,"524,525x526",0,1,0,12/12/17,12/12/17,1/9/18,4/5/18,3,114,114,,,NA,NA,1,NA,0,0,1,missing,0,1,1,0,missing,
21889,CC010,"524,525x526",0,1,0,12/12/17,12/12/17,1/9/18,4/30/18,4,139,139,,,NA,NA,6,5/22/18,3,1,2,2 missing,4,2,1,1,2 missing,
21889,CC010,"527,528x529",0,1,0,12/19/17,12/19/17,1/9/18,2/23/18,1,66,66,,,66,NA,9,3/20/18,2,7,0,,9,0,1,1,,
21889,CC010,"527,528x529",0,1,0,12/19/17,12/19/17,1/9/18,4/4/18,2,106,106,,,NA,NA,1,NA,0,0,1,missing,0,1,1,0,missing,
21889,CC010,"527,528x529",0,1,0,12/19/17,12/19/17,1/9/18,7/3/18,3,196,196,,,NA,NA,2,NA,0,0,2,2 missing,0,2,1,0,2 missing,
21889,CC010,530x531,1,0,0,12/16/17,12/16/17,1/9/18,3/5/18,1,79,79,,,79,NA,1,NA,0,0,1,LNR; missing,0,1,1,0,LNR; missing,
21889,CC010,530x531,1,0,0,12/16/17,12/16/17,1/9/18,3/23/18,2,97,97,,,NA,18,5,4/17/18,2,2,1,,4,1,1,1,,
21889,CC010,530x531,1,0,0,12/16/17,12/16/17,1/9/18,5/25/18,3,160,160,,,NA,63,1,NA,0,0,1,missing,0,1,1,0,missing,
21889,CC010,530x531,1,0,0,12/16/17,12/16/17,1/9/18,7/12/18,4,208,208,,,NA,48,2,NA,0,0,2,missing,0,2,1,0,missing,
21889,CC010,530x531,1,0,0,12/16/17,12/16/17,1/9/18,8/2/18,5,229,229,,,NA,21,2,NA,0,0,2,missing,0,2,1,0,missing,
21889,CC010,"532,533x534",0,1,0,12/30/17,12/30/17,1/22/18,NA,1,NA,NA,,,NA,NA,0,NA,0,0,,,0,0,1,0,unproductive,
21889,CC010,"535,536x537",0,1,0,1/12/18,1/12/18,2/6/18,3/29/18,1,76,76,,,76,NA,5,4/23/18,2,1,2,missing,3,2,1,1,missing,
21889,CC010,"535,536x537",0,1,0,1/12/18,1/12/18,2/6/18,4/19/18,2,97,97,,,NA,NA,2,NA,0,0,2,missing,0,2,1,0,missing,
21889,CC010,"535,536x537",0,1,0,1/12/18,1/12/18,2/6/18,4/24/18,3,102,102,,,NA,NA,5,5/15/18,2,1,2,missing,3,2,1,1,missing,
21889,CC010,"535,536x537",0,1,0,1/12/18,1/12/18,2/6/18,5/9/18,4,117,117,,,NA,NA,3,5/31/18,0,2,1,1 missing,2,1,1,1,1 missing,
21889,CC010,"535,536x537",0,1,0,1/12/18,1/12/18,2/6/18,6/7/18,5,146,146,,,NA,NA,2,NA,0,0,2,missing,0,2,1,0,missing,
21889,CC010,"535,536x537",0,1,0,1/12/18,1/12/18,2/6/18,7/13/18,6,182,182,,,NA,NA,4,8/7/18,0,3,1,1 missing,3,1,1,1,1 missing,
21889,CC010,"535,536x537",0,1,0,1/12/18,1/12/18,2/6/18,8/7/18,7,207,207,,,NA,NA,3,8/28/18,0,3,0,,3,0,1,1,,
21889,CC010,"535,536x537",0,1,0,1/12/18,1/12/18,2/6/18,8/29/18,8,229,229,,,NA,NA,3,9/25/18,2,1,0,,3,0,1,1,,
21889,CC010,"535,536x537",0,1,0,1/12/18,1/12/18,2/6/18,9/4/18,9,235,235,,,NA,NA,5,10/2/18,1,1,3,3 missing; 537 pulled 8/24/18,2,3,1,1,3 missing; 537 pulled 8/24/18,
21889,CC010,"538,539x540",0,1,0,1/9/18,1/9/18,2/6/18,3/26/18,1,76,76,,,76,NA,2,4/17/18,0,0,,,0,2,1,0,nonproductive,
21889,CC010,"541,542x543",0,1,0,1/22/18,1/22/18,2/20/18,3/27/18,1,64,64,,,64,NA,3,4/27/18,2,0,1,1 missing,2,1,1,1,1 missing,
21889,CC010,"541,542x543",0,1,0,1/22/18,1/22/18,2/20/18,4/6/18,2,74,74,,,NA,NA,4,5/1/18,3,1,0,,4,0,1,1,,
21889,CC010,"541,542x543",0,1,0,1/22/18,1/22/18,2/20/18,4/19/18,3,87,87,,,NA,NA,2,5/15/18,0,2,0,,2,0,1,1,,
21889,CC010,"541,542x543",0,1,0,1/22/18,1/22/18,2/20/18,6/20/18,4,149,149,,,NA,NA,5,7/18/18,3,0,2,1 FD,3,2,1,1,1 FD,
21889,CC010,"541,542x543",0,1,0,1/22/18,1/22/18,2/20/18,7/13/18,5,172,172,,,NA,NA,3,8/7/18,1,1,1,1 missing,2,1,1,1,1 missing,
21889,CC010,544x545,1,0,0,1/26/18,1/26/18,2/20/18,4/16/18,1,80,80,,,80,NA,5,5/15/18,2,1,2,2 missing,3,2,1,1,2 missing,
21889,CC010,"546,547x548",0,1,0,2/7/18,2/7/18,3/6/18,3/26/18,1,47,47,,,47,NA,5,4/17/18,3,1,1,,4,1,1,1,,
21889,CC010,"546,547x548",0,1,0,2/7/18,2/7/18,3/6/18,4/17/18,2,69,69,,,NA,NA,3,5/15/18,0,1,2,,1,2,1,1,,
21889,CC010,"546,547x548",0,1,0,2/7/18,2/7/18,3/6/18,5/8/18,3,90,90,,,NA,NA,7,5/31/18,4,3,0,,7,0,1,1,,
21889,CC010,"546,547x548",0,1,0,2/7/18,2/7/18,3/6/18,6/2/18,4,115,115,,,NA,NA,7,6/26/18,3,2,2,missing,5,2,1,1,missing,
21889,CC010,"546,547x548",0,1,0,2/7/18,2/7/18,3/6/18,6/23/18,5,136,136,,,NA,NA,9,7/18/18,6,3,0,,9,0,1,1,,
21889,CC010,"546,547x548",0,1,0,2/7/18,2/7/18,3/6/18,7/16/18,6,159,159,,,NA,NA,2,8/14/18,0,2,0,,2,0,1,1,,
21889,CC010,"546,547x548",0,1,0,2/7/18,2/7/18,3/6/18,8/8/18,7,182,182,,,NA,NA,2,8/28/18,1,1,0,,2,0,1,1,,
21889,CC010,"546,547x548",0,1,0,2/7/18,2/7/18,3/6/18,8/14/18,8,188,188,,,NA,NA,4,9/5/18,4,0,0,,4,0,1,1,,
21889,CC010,"546,547x548",0,1,0,2/7/18,2/7/18,3/6/18,8/29/18,9,203,203,,,NA,NA,5,9/18/18,0,2,3,1 BD; 2 missing,2,3,1,1,1 BD; 2 missing,
21889,CC010,"546,547x548",0,1,0,2/7/18,2/7/18,3/6/18,9/6/18,10,211,211,,,NA,NA,1,NA,0,0,1,missing,0,1,1,0,missing,
21889,CC010,"549,550x551",0,1,0,2/15/18,2/15/18,3/6/18,5/3/18,1,77,77,,,77,NA,5,5/31/18,4,1,0,,5,0,1,1,,
21889,CC010,"549,550x551",0,1,0,2/15/18,2/15/18,3/6/18,5/9/18,2,83,83,,,NA,NA,7,6/5/18,1,1,5,2 missing; 1 female AH,2,5,1,1,2 missing; 1 female AH,
21889,CC010,"549,550x551",0,1,0,2/15/18,2/15/18,3/6/18,6/12/18,3,117,117,,,NA,NA,1,NA,0,0,1,FD,0,1,1,0,FD,
21889,CC010,"549,550x551",0,1,0,2/15/18,2/15/18,3/6/18,7/2/18,4,137,137,,,NA,NA,4,7/25/18,2,1,1,1 missing,3,1,1,1,1 missing,
21889,CC010,"549,550x551",0,1,0,2/15/18,2/15/18,3/6/18,7/6/18,5,141,141,,,NA,NA,2,7/31/18,1,0,1,1 missing,1,1,1,1,1 missing,
21889,CC010,"549,550x551",0,1,0,2/15/18,2/15/18,3/6/18,7/26/18,6,161,161,,,NA,NA,3,8/21/18,3,0,0,,3,0,1,1,,
21889,CC010,"549,550x551",0,1,0,2/15/18,2/15/18,3/6/18,8/2/18,7,168,168,,,NA,NA,5,8/28/18,1,3,1,1 missing,4,1,1,1,1 missing,
21889,CC010,"549,550x551",0,1,0,2/15/18,2/15/18,3/6/18,9/12/18,8,209,209,,,NA,NA,1,NA,0,0,1,1 BD,0,1,1,0,1 BD,
21889,CC010,"552,553x554",0,1,0,2/7/18,2/7/18,3/12/18,4/20/18,1,72,72,,,72,NA,2,5/15/18,1,0,1,1 missing,1,1,1,1,1 missing,
21889,CC010,"552,553x554",0,1,0,2/7/18,2/7/18,3/12/18,4/30/18,2,82,82,,,NA,NA,3,5/22/18,1,1,1,1 missing,2,1,1,1,1 missing,
21889,CC010,"552,553x554",0,1,0,2/7/18,2/7/18,3/12/18,5/13/18,3,95,95,,,NA,NA,4,6/5/18,2,1,1,1 female AH,3,1,1,1,1 female AH,
21889,CC010,"552,553x554",0,1,0,2/7/18,2/7/18,3/12/18,5/20/18,4,102,102,,,NA,NA,1,NA,0,0,1,missing,0,1,1,0,missing,
21889,CC010,"552,553x554",0,1,0,2/7/18,2/7/18,3/12/18,6/8/18,5,121,121,,,NA,NA,4,7/3/18,4,0,0,,4,0,1,1,,
21889,CC010,"552,553x554",0,1,0,2/7/18,2/7/18,3/12/18,6/14/18,6,127,127,,,NA,NA,3,7/18/18,1,1,1,1 missing,2,1,1,1,1 missing,
21889,CC010,"552,553x554",0,1,0,2/7/18,2/7/18,3/12/18,7/3/18,7,146,146,,,NA,NA,4,7/24/18,1,1,2,2 missing,2,2,1,1,2 missing,
21889,CC010,"552,553x554",0,1,0,2/7/18,2/7/18,3/12/18,7/17/18,8,160,160,,,NA,NA,4,7/31/18,1,3,0,554 AH 10/5/18,4,0,1,1,554 AH 10/5/18,
21889,CC010,555x556,1,0,0,2/20/18,2/20/18,3/12/18,5/8/18,1,77,77,,,77,NA,4,5/31/18,3,1,0,,4,0,1,1,,
21889,CC010,555x556,1,0,0,2/20/18,2/20/18,3/12/18,6/26/18,2,126,126,,,NA,49,1,NA,0,0,1,1 BD,0,1,1,0,1 BD,
21889,CC010,555x556,1,0,0,2/20/18,2/20/18,3/12/18,8/21/18,3,182,182,,,NA,56,3,NA,0,0,3,missing,0,3,1,0,missing,
21889,CC010,"557,558x559",0,1,0,2/24/18,2/24/18,3/20/18,5/6/18,1,71,71,,,71,NA,6,5/31/18,3,3,0,,6,0,1,1,,
21889,CC010,"557,558x559",0,1,0,2/24/18,2/24/18,3/20/18,5/30/18,2,95,95,,,NA,NA,4,6/19/18,1,3,0,,4,0,1,1,,
21889,CC010,"560,561x562",0,1,0,2/22/18,2/22/18,3/20/18,5/8/18,1,75,75,,,75,NA,4,5/31/18,1,2,1,,3,1,1,1,,
21889,CC010,"560,561x562",0,1,0,2/22/18,2/22/18,3/20/18,5/31/18,2,98,98,,,NA,NA,2,NA,0,0,2,missing,0,2,1,0,missing,
21889,CC010,"560,561x562",0,1,0,2/22/18,2/22/18,3/20/18,7/6/18,3,134,134,,,NA,NA,2,NA,0,0,2,2 BD,0,2,1,0,2 BD,
21889,CC010,"560,561x562",0,1,0,2/22/18,2/22/18,3/20/18,8/12/18,4,171,171,,,NA,NA,1,9/3/18,0,1,0,,1,0,1,1,,
21889,CC010,"560,561x562",0,1,0,2/22/18,2/22/18,3/20/18,9/5/18,5,195,195,,,NA,NA,2,10/2/18,1,1,0,,2,0,1,1,,
21889,CC010,"575,576x577",0,1,0,4/6/18,4/6/18,5/1/18,6/7/18,1,62,62,,,62,NA,3,7/3/18,0,2,1,LNR; 1 missing,2,1,1,1,LNR; 1 missing,
21889,CC010,"575,576x577",0,1,0,4/6/18,4/6/18,5/1/18,6/13/18,2,68,68,,,NA,NA,5,7/18/18,3,1,1,1 missing,4,1,1,1,1 missing,
21889,CC010,"575,576x577",0,1,0,4/6/18,4/6/18,5/1/18,7/5/18,3,90,90,,,NA,NA,3,NA,0,0,3,missing,0,3,1,0,missing,
21889,CC010,"575,576x577",0,1,0,4/6/18,4/6/18,5/1/18,7/29/18,4,114,114,,,NA,NA,1,8/28/18,0,1,0,,1,0,1,1,,
21889,CC010,"575,576x577",0,1,0,4/6/18,4/6/18,5/1/18,8/8/18,5,124,124,,,NA,NA,2,NA,0,0,2,1 missing; 1 FD,0,2,1,0,1 missing; 1 FD,
21889,CC010,"575,576x577",0,1,0,4/6/18,4/6/18,5/1/18,8/29/18,6,145,145,,,NA,NA,8,9/18/18,4,3,1,1 missing; 575 FD 8/28/18,7,1,1,1,1 missing; 575 FD 8/28/18,
21889,CC010,"578,579x580",0,1,0,4/30/18,4/30/18,5/22/18,7/24/18,1,85,85,,,85,NA,6,8/14/18,2,2,2,2 missing; nonproductive 10/30/18; 578 FD 7/3/18,4,2,1,1,2 missing; nonproductive 10/30/18; 578 FD 7/3/18,
21889,CC010,"584,585x586",0,1,0,5/3/18,5/3/18,5/31/18,NA,1,NA,NA,,,NA,NA,0,NA,0,0,0,nonproductive 9/5/18,0,0,1,0,nonproductive 9/5/18,
21889,CC010,"590,591x592",0,1,0,5/6/18,5/6/18,5/31/18,8/5/18,1,91,91,,,91,NA,7,8/28/18,1,4,2,1 missing; 1 female AH; 590 dystosia 10/9/18,5,2,1,1,1 missing; 1 female AH; 590 dystosia 10/9/18,
21889,CC010,593x594,1,0,0,5/6/18,5/6/18,5/31/18,NA,1,NA,NA,,,NA,NA,0,NA,0,0,0,,0,0,1,0,,
18854,CC011,"105,106x107",0,1,0,9/3/16,9/3/16,9/30/16,NA,1,NA,NA,,,NA,NA,0,NA,0,0,,,0,0,1,0,nonproductive,
18854,CC011,"108,109x110",0,1,0,9/3/16,9/3/16,9/30/16,11/18/16,1,76,76,,,76,NA,6,12/8/16,2,4,0,,6,0,1,1,,
18854,CC011,"108,109x110",0,1,0,9/3/16,9/3/16,9/30/16,11/28/16,2,86,86,,,NA,NA,3,12/21/16,1,2,0,,3,0,1,1,,
18854,CC011,"108,109x110",0,1,0,9/3/16,9/3/16,9/30/16,12/21/16,3,109,109,,,NA,NA,7,1/12/17,3,3,1,1 missing,6,1,1,1,1 missing,
18854,CC011,"108,109x110",0,1,0,9/3/16,9/3/16,9/30/16,12/26/16,4,114,114,,,NA,NA,8,1/20/17,4,2,2,2 missing,6,2,1,1,2 missing,
18854,CC011,"108,109x110",0,1,0,9/3/16,9/3/16,9/30/16,1/13/17,5,132,132,,,NA,NA,2,2/2/17,1,1,0,retired breeders 1/12/17,2,0,1,1,retired breeders 1/12/17,
18854,CC011,"111,112x113",0,1,0,8/30/16,8/30/16,9/30/16,10/31/16,1,62,62,,,62,NA,5,11/22/16,3,2,0,,5,0,1,1,,
18854,CC011,"111,112x113",0,1,0,8/30/16,8/30/16,9/30/16,11/21/16,2,83,83,,,NA,NA,6,12/15/16,3,3,0,,6,0,1,1,,
18854,CC011,"111,112x113",0,1,0,8/30/16,8/30/16,9/30/16,12/28/16,3,120,120,,,NA,NA,5,1/20/17,2,2,1,1 missing,4,1,1,1,1 missing,
18854,CC011,"111,112x113",0,1,0,8/30/16,8/30/16,9/30/16,1/20/17,4,143,143,,,NA,NA,4,NA,0,0,4,no wean date or weaned numbers on card; retired breeders 1/12/17,0,4,1,0,no wean date or weaned numbers on card; retired breeders 1/12/17,
18854,CC011,"114,115x116",0,1,0,7/26/16,7/26/16,9/30/16,10/19/16,1,85,85,,,85,NA,8,11/11/16,6,2,0,,8,0,1,1,,
18854,CC011,"114,115x116",0,1,0,7/26/16,7/26/16,9/30/16,10/24/16,2,90,90,,,NA,NA,4,11/17/16,1,3,0,,4,0,1,1,,
18854,CC011,"114,115x116",0,1,0,7/26/16,7/26/16,9/30/16,11/11/16,3,108,108,,,NA,NA,1,12/1/16,1,0,0,,1,0,1,1,,
18854,CC011,"114,115x116",0,1,0,7/26/16,7/26/16,9/30/16,11/16/16,4,113,113,,,NA,NA,3,12/8/16,1,2,0,,3,0,1,1,,
18854,CC011,"114,115x116",0,1,0,7/26/16,7/26/16,9/30/16,12/8/16,5,135,135,,,NA,NA,4,12/29/16,1,3,0,,4,0,1,1,,
18854,CC011,"114,115x116",0,1,0,7/26/16,7/26/16,9/30/16,12/18/16,6,145,145,,,NA,NA,6,1/12/17,0,4,2,2 missing,4,2,1,1,2 missing,
18854,CC011,"114,115x116",0,1,0,7/26/16,7/26/16,9/30/16,12/28/16,7,155,155,,,NA,NA,2,1/20/17,1,1,0,,2,0,1,1,,
18854,CC011,"114,115x116",0,1,0,7/26/16,7/26/16,9/30/16,1/10/17,8,168,168,,,NA,NA,6,2/2/17,3,3,0,RB 1/12/17,6,0,1,1,RB 1/12/17,
18854,CC011,"117,118x119",0,1,0,7/26/16,7/26/16,9/30/16,NA,1,NA,NA,,,NA,NA,0,NA,0,0,,,0,0,1,0,nonproductive; 119 FD 1/12/17,
18854,CC011,"120,121x122",0,1,0,9/17/16,9/17/16,10/20/16,12/20/16,1,94,94,,,94,NA,7,1/12/17,3,3,1,,6,1,1,1,,
18854,CC011,"120,121x122",0,1,0,9/17/16,9/17/16,10/20/16,12/24/16,2,98,98,,,NA,NA,5,1/20/17,2,3,0,,5,0,1,1,,
18854,CC011,"120,121x122",0,1,0,9/17/16,9/17/16,10/20/16,1/22/17,3,127,127,,,NA,NA,5,2/16/17,4,1,0,120 FD 1/3/17; RB 2/16/17,5,0,1,1,120 FD 1/3/17; RB 2/16/17,
18854,CC011,"123,124x125",0,1,0,9/16/16,9/16/16,10/20/16,11/21/16,1,66,66,,,66,NA,3,12/15/16,2,1,0,,3,0,1,1,,
18854,CC011,"123,124x125",0,1,0,9/16/16,9/16/16,10/20/16,11/28/16,2,73,73,,,NA,NA,3,12/21/16,1,0,2,2 missing,1,2,1,1,2 missing,
18854,CC011,"123,124x125",0,1,0,9/16/16,9/16/16,10/20/16,12/15/16,3,90,90,,,NA,NA,6,1/5/17,3,3,0,,6,0,1,1,,
18854,CC011,"123,124x125",0,1,0,9/16/16,9/16/16,10/20/16,12/19/16,4,94,94,,,NA,NA,7,1/12/17,2,5,0,,7,0,1,1,,
18854,CC011,"123,124x125",0,1,0,9/16/16,9/16/16,10/20/16,1/11/17,5,117,117,,,NA,NA,7,2/2/17,5,2,0,,7,0,1,1,,
18854,CC011,"123,124x125",0,1,0,9/16/16,9/16/16,10/20/16,2/11/17,6,148,148,,,NA,NA,7,2/23/17,3,4,0,retired breeders 2/16/17,7,0,1,1,retired breeders 2/16/17,
18854,CC011,"126,127x128",0,1,0,9/16/16,9/16/16,10/20/16,12/4/16,1,79,79,,,79,NA,6,12/29/16,3,2,1,,5,1,1,1,,
18854,CC011,"126,127x128",0,1,0,9/16/16,9/16/16,10/20/16,12/14/16,2,89,89,,,NA,NA,6,1/5/17,0,2,4,4 missing,2,4,1,1,4 missing,
18854,CC011,"126,127x128",0,1,0,9/16/16,9/16/16,10/20/16,12/26/16,3,101,101,,,NA,NA,9,1/20/17,1,1,7,7 missing,2,7,1,1,7 missing,
18854,CC011,"126,127x128",0,1,0,9/16/16,9/16/16,10/20/16,2/1/17,4,138,138,,,NA,NA,4,2/23/17,3,1,0,retired breeders 2/16/17,4,0,1,1,retired breeders 2/16/17,
18854,CC011,"129,130x131",0,1,0,10/19/16,10/19/16,11/11/16,1/25/17,1,98,98,,,98,NA,6,2/16/17,1,3,2,2 missing; retired breeders 3/16/17,4,2,1,1,2 missing; retired breeders 3/16/17,
18854,CC011,"132,133x134",0,1,0,10/19/16,10/19/16,11/11/16,1/5/17,1,78,78,,,78,NA,6,1/25/17,3,3,0,,6,0,1,1,,
18854,CC011,"132,133x134",0,1,0,10/19/16,10/19/16,11/11/16,1/25/17,2,98,98,,,NA,NA,3,2/10/17,0,3,0,,3,0,1,1,,
18854,CC011,"132,133x134",0,1,0,10/19/16,10/19/16,11/11/16,2/16/17,3,120,120,,,NA,NA,7,3/8/17,3,4,0,retired breeders 3/16/17,7,0,1,1,retired breeders 3/16/17,
18854,CC011,"135,136x137",0,1,0,11/6/16,11/6/16,12/1/16,3/4/17,1,118,118,3/9/17,,118,NA,8,3/30/17,6,2,0,RB 3/3/17,8,0,2,2,RB 3/3/17,
18854,CC011,"138,139x140",0,1,0,11/6/16,11/6/16,12/1/16,1/29/17,1,84,84,,,84,NA,7,2/23/17,4,2,1,,6,1,1,1,,
18854,CC011,"138,139x140",0,1,0,11/6/16,11/6/16,12/1/16,2/4/17,2,90,90,,,NA,NA,2,3/3/17,2,0,0,,2,0,1,1,,
18854,CC011,"138,139x140",0,1,0,11/6/16,11/6/16,12/1/16,2/21/17,3,107,107,,,NA,NA,3,3/16/17,2,1,0,,3,0,1,1,,
18854,CC011,"138,139x140",0,1,0,11/6/16,11/6/16,12/1/16,2/28/17,4,114,114,,,NA,NA,6,3/23/17,2,3,1,retired breeders 3/23/17,5,1,1,1,retired breeders 3/23/17,
18854,CC011,141x142,1,0,0,11/16/16,11/16/16,12/8/16,2/10/17,1,86,86,,,86,NA,6,3/3/17,4,2,,,6,0,1,1,,
18854,CC011,141x142,1,0,0,11/16/16,11/16/16,12/8/16,3/15/17,2,119,119,,,NA,33,6,4/13/17,0,2,,,2,4,1,1,missing,
18854,CC011,"143,144x145",0,1,0,11/18/16,11/18/16,12/8/16,2/21/17,1,95,95,,,95,NA,5,3/16/17,3,2,,,5,0,1,1,,
18854,CC011,"143,144x145",0,1,0,11/18/16,11/18/16,12/8/16,4/4/17,2,137,137,,,NA,NA,6,5/5/17,2,3,,,5,1,1,1,missing,
18854,CC011,"146,147x148",0,1,0,11/21/16,11/21/16,12/15/16,3/14/17,1,113,113,,,113,NA,3,NA,0,0,3,3 missing; RB 3/23/17,0,3,1,0,3 missing; RB 3/23/17,
18854,CC011,"149,150x151",0,1,0,11/21/16,11/21/16,12/15/16,1/29/17,1,69,69,,,69,NA,6,2/27/17,5,1,0,,6,0,1,1,,
18854,CC011,"149,150x151",0,1,0,11/21/16,11/21/16,12/15/16,2/2/17,2,73,73,,,NA,NA,3,NA,0,0,3,,0,3,1,0,,
18854,CC011,"149,150x151",0,1,0,11/21/16,11/21/16,12/15/16,2/18/17,3,89,89,,,NA,NA,1,NA,0,0,1,,0,1,1,0,,
18854,CC011,"149,150x151",0,1,0,11/21/16,11/21/16,12/15/16,2/24/17,4,95,95,,,NA,NA,4,3/16/17,1,2,1,,3,1,1,1,,
18854,CC011,"149,150x151",0,1,0,11/21/16,11/21/16,12/15/16,3/27/17,5,126,126,3/31/17,,NA,NA,12,4/19/17,5,5,2,RB 3/23/17,10,2,2,2,RB 3/23/17,
18854,CC011,"152,153x154",0,1,0,12/21/16,12/21/16,1/12/17,2/25/17,1,66,66,,,66,NA,5,3/23/17,2,3,,,5,0,1,1,,
18854,CC011,"152,153x154",0,1,0,12/21/16,12/21/16,1/12/17,3/22/17,2,91,91,,,NA,NA,6,4/13/17,5,1,,,6,0,1,1,,
18854,CC011,"152,153x154",0,1,0,12/21/16,12/21/16,1/12/17,4/4/17,3,104,104,,,NA,NA,4,4/26/17,4,0,,,4,0,1,1,,
18854,CC011,"155,156x157",0,1,0,1/10/17,1/10/17,2/2/17,3/31/17,1,80,80,,,80,NA,6,4/19/17,2,3,,,5,1,1,1,,
18854,CC011,"155,156x157",0,1,0,1/10/17,1/10/17,2/2/17,5/13/17,2,123,123,,,NA,NA,2,6/8/17,2,0,,,2,0,1,1,retired breeder 5/17/17; 155 FD 5/30/17,
18854,CC011,"158,159x160",0,1,0,1/22/17,1/22/17,2/1/17,4/9/17,1,77,77,,,77,NA,4,5/5/17,3,1,,,4,0,1,1,,
18854,CC011,"158,159x160",0,1,0,1/22/17,1/22/17,2/1/17,5/1/17,2,99,99,,,NA,NA,4,5/26/17,1,3,,,4,0,1,1,retired breeders 5/17/17,
18854,CC011,"161,162x163",0,1,0,2/1/17,2/1/17,2/23/17,6/7/17,1,126,126,,,126,NA,6,6/29/17,3,3,0,0,6,0,1,1,,
18854,CC011,"164,165x166",0,1,0,2/1/17,2/1/17,2/23/17,NA,1,NA,NA,,,NA,NA,0,NA,0,0,0,0,0,0,1,0,,
18854,CC011,"176,177x178",0,1,0,2/25/17,2/25/17,3/23/17,5/9/17,1,73,73,,,73,NA,5,6/2/17,3,2,0,0,5,0,1,1,male sick 6/19/17,
18854,CC011,"176,177x178",0,1,0,2/25/17,2/25/17,3/23/17,5/21/17,2,85,85,,,NA,NA,3,6/23/17,2,1,0,0,3,0,1,1,male sick 6/19/17,
18854,CC011,"176,177x178",0,1,0,2/25/17,2/25/17,3/23/17,5/31/17,3,95,95,,,NA,NA,5,NA,NA,NA,NA,NA,NA,NA,1,0,male sick 6/19/17,
18854,CC011,"179,180x181",0,1,0,3/22/17,3/22/17,4/13/17,6/6/17,1,76,76,,,76,NA,8,6/29/17,5,2,1,,7,1,1,1,,
18854,CC011,"179,180x181",0,1,0,3/22/17,3/22/17,4/13/17,6/12/17,2,82,82,,,NA,NA,2,7/5/17,1,1,0,,2,0,1,1,,
18854,CC011,"179,180x181",0,1,0,3/22/17,3/22/17,4/13/17,7/19/17,3,119,119,,,NA,NA,8,8/8/17,1,7,0,,8,0,1,1,,
18854,CC011,"179,180x181",0,1,0,3/22/17,3/22/17,4/13/17,10/1/17,4,193,193,,,NA,NA,5,11/2/17,2,3,0,,5,0,1,1,,
18854,CC011,"188,189x190",0,1,0,4/4/17,4/4/17,5/5/17,6/6/17,1,63,63,,,63,NA,1,NA,0,0,1,missing,0,1,1,0,missing,
18854,CC011,"188,189x190",0,1,0,4/4/17,4/4/17,5/5/17,6/24/17,2,81,81,6/26/17,,NA,NA,7,7/19/17,4,3,0,,7,0,2,2,,
18854,CC011,"188,189x190",0,1,0,4/4/17,4/4/17,5/5/17,7/19/17,3,106,106,,,NA,NA,1,NA,0,0,1,missing,0,1,1,0,missing,
18854,CC011,"188,189x190",0,1,0,4/4/17,4/4/17,5/5/17,8/9/17,4,127,127,,,NA,NA,5,9/6/17,2,2,1,missing,4,1,1,1,missing,
18854,CC011,"188,189x190",0,1,0,4/4/17,4/4/17,5/5/17,9/11/17,5,160,160,,,NA,NA,5,10/3/17,2,2,1,missing,4,1,1,1,missing,
18854,CC011,"188,189x190",0,1,0,4/4/17,4/4/17,5/5/17,9/26/17,6,175,175,,,NA,NA,2,11/2/17,1,1,0,,2,0,1,1,,
18854,CC011,"194,195x196",0,1,0,5/1/17,5/1/17,5/26/17,7/15/17,1,75,75,,,75,NA,7,8/8/17,4,3,0,,7,0,1,1,,
18854,CC011,"194,195x196",0,1,0,5/1/17,5/1/17,5/26/17,8/8/17,2,99,99,,,NA,NA,3,9/6/17,2,1,0,,3,0,1,1,,
18854,CC011,"194,195x196",0,1,0,5/1/17,5/1/17,5/26/17,8/29/17,3,120,120,,,NA,NA,7,9/18/17,4,3,0,,7,0,1,1,,
18854,CC011,"194,195x196",0,1,0,5/1/17,5/1/17,5/26/17,9/19/17,4,141,141,,,NA,NA,4,10/8/17,2,2,0,retired breeders survey,4,0,1,1,retired breeders survey,
18854,CC011,"202,203x204",0,1,0,6/10/17,6/10/17,7/5/17,NA,1,NA,NA,,,NA,NA,0,NA,0,0,0,,0,0,1,0,,
18854,CC011,205x206,1,0,0,6/12/17,6/12/17,7/5/17,NA,1,NA,NA,,,NA,NA,0,NA,0,0,0,,0,0,1,0,,
18854,CC011,"207,208x209",0,1,0,7/15/17,7/15/17,9/6/17,10/8/17,1,85,85,,,85,NA,3,11/7/17,1,1,1,1 missing,2,1,1,1,1 missing,
18854,CC011,"207,208x209",0,1,0,7/15/17,7/15/17,9/6/17,10/29/17,2,106,106,,,NA,NA,2,11/22/17,1,1,0,,2,0,1,1,,
18854,CC011,"207,208x209",0,1,0,7/15/17,7/15/17,9/6/17,12/11/17,3,149,149,,,NA,NA,4,1/2/18,2,2,0,,4,0,1,1,,
18854,CC011,"207,208x209",0,1,0,7/15/17,7/15/17,9/6/17,1/2/18,4,171,171,,,NA,NA,1,2/2/18,0,1,0,,1,0,1,1,,
18854,CC011,"210,211x212",0,1,0,7/15/17,7/15/17,9/6/17,NA,1,NA,NA,,,NA,NA,0,NA,0,0,0,,0,0,1,0,,
18854,CC011,"213,214x215",0,1,0,7/11/17,7/11/17,9/6/17,NA,1,NA,NA,,,NA,NA,0,NA,0,0,0,,0,0,1,0,,
18854,CC011,"216,217x218",0,1,0,8/8/17,8/8/17,9/18/17,10/19/17,1,72,72,10/20/17,,72,NA,6,11/7/17,2,4,,,6,0,2,2,,
18854,CC011,"216,217x218",0,1,0,8/8/17,8/8/17,9/18/17,11/8/17,2,92,92,,,NA,NA,7,12/6/17,2,5,,,7,0,1,1,,
18854,CC011,"216,217x218",0,1,0,8/8/17,8/8/17,9/18/17,11/28/17,3,112,112,,,NA,NA,10,12/27/17,6,4,,,10,0,1,1,,
18854,CC011,"216,217x218",0,1,0,8/8/17,8/8/17,9/18/17,1/18/18,4,163,163,,,NA,NA,2,2/14/18,1,1,,,2,0,1,1,,
18854,CC011,"216,217x218",0,1,0,8/8/17,8/8/17,9/18/17,1/28/18,5,173,173,,,NA,NA,3,2/20/18,3,0,,,3,0,1,1,,
18854,CC011,"216,217x218",0,1,0,8/8/17,8/8/17,9/18/17,2/11/18,6,187,187,,,NA,NA,3,3/7/18,2,1,,,3,0,1,1,,
18854,CC011,"216,217x218",0,1,0,8/8/17,8/8/17,9/18/17,3/29/18,7,233,233,,,NA,NA,5,4/25/18,2,3,,,5,0,1,1,,
18854,CC011,"219,220x21",0,1,0,7/30/17,7/30/17,9/26/17,10/23/17,1,85,85,,,85,NA,3,11/15/17,1,0,2,,1,2,1,1,,
18854,CC011,"219,220x21",0,1,0,7/30/17,7/30/17,9/26/17,11/28/17,2,121,121,,,NA,NA,3,12/27/17,3,0,0,,3,0,1,1,,
18854,CC011,"219,220x21",0,1,0,7/30/17,7/30/17,9/26/17,1/19/18,3,173,173,,,NA,NA,2,2/14/18,1,1,0,,2,0,1,1,,
18854,CC011,"219,220x21",0,1,0,7/30/17,7/30/17,9/26/17,2/25/18,4,210,210,,,NA,NA,3,NA,0,0,3,,0,3,1,0,,
18854,CC011,"219,220x221",0,1,0,7/30/17,7/30/17,9/26/17,10/23/17,1,85,85,,,85,NA,3,11/15/17,1,0,2,,1,2,1,1,,
18854,CC011,"219,220x221",0,1,0,7/30/17,7/30/17,9/26/17,11/28/17,2,121,121,,,NA,NA,3,12/27/17,3,0,0,,3,0,1,1,,
18854,CC011,"219,220x221",0,1,0,7/30/17,7/30/17,9/26/17,1/19/18,3,173,173,,,NA,NA,2,2/14/18,1,1,0,,2,0,1,1,,
18854,CC011,"219,220x221",0,1,0,7/30/17,7/30/17,9/26/17,2/25/18,4,210,210,,,NA,NA,3,NA,0,0,3,,0,3,1,0,,
18854,CC011,"222,223x224",0,1,0,8/9/17,8/9/17,9/26/17,10/22/17,1,74,74,,,74,NA,10,11/15/17,5,5,0,,10,0,1,1,,
18854,CC011,"222,223x224",0,1,0,8/9/17,8/9/17,9/26/17,1/10/18,2,154,154,,,NA,NA,3,2/7/18,2,1,0,224 discard b/c prolapse 1/31/18,3,0,1,1,224 discard b/c prolapse 1/31/18,
18854,CC011,"225,226x227",0,1,0,8/29/17,8/29/17,10/17/17,11/7/17,1,70,70,,,70,NA,5,12/6/17,1,4,0,,5,0,1,1,,
18854,CC011,"225,226x227",0,1,0,8/29/17,8/29/17,10/17/17,11/13/17,2,76,76,,,NA,NA,6,12/12/17,4,2,0,,6,0,1,1,,
18854,CC011,"225,226x227",0,1,0,8/29/17,8/29/17,10/17/17,12/6/17,3,99,99,,,NA,NA,7,1/2/18,5,1,1,1 missing,6,1,1,1,1 missing,
18854,CC011,"225,226x227",0,1,0,8/29/17,8/29/17,10/17/17,12/27/17,4,120,120,,,NA,NA,3,NA,0,0,3,missing,0,3,1,0,missing,
18854,CC011,"225,226x227",0,1,0,8/29/17,8/29/17,10/17/17,1/23/18,5,147,147,,,NA,NA,4,2/14/18,3,1,0,,4,0,1,1,,
18854,CC011,"225,226x227",0,1,0,8/29/17,8/29/17,10/17/17,1/28/18,6,152,152,,,NA,NA,4,2/20/18,3,1,0,,4,0,1,1,,
18854,CC011,"225,226x227",0,1,0,8/29/17,8/29/17,10/17/17,2/20/18,7,175,175,,,NA,NA,8,3/13/18,4,2,2,,6,2,1,1,,
18854,CC011,"228,229x230",0,1,0,8/29/17,8/29/17,10/17/17,11/8/17,1,71,71,,,71,NA,4,12/6/17,3,1,0,,4,0,1,1,,
18854,CC011,"228,229x230",0,1,0,8/29/17,8/29/17,10/17/17,11/16/17,2,79,79,,,NA,NA,6,12/12/17,2,4,0,,6,0,1,1,,
18854,CC011,"228,229x230",0,1,0,8/29/17,8/29/17,10/17/17,12/8/17,3,101,101,,,NA,NA,10,1/2/18,4,6,0,,10,0,1,1,,
18854,CC011,"228,229x230",0,1,0,8/29/17,8/29/17,10/17/17,1/19/18,4,143,143,,,NA,NA,1,2/14/18,0,1,0,,1,0,1,1,,
18854,CC011,"228,229x230",0,1,0,8/29/17,8/29/17,10/17/17,2/23/18,5,178,178,,,NA,NA,2,3/13/18,2,0,0,228 FD 12/18/17,2,0,1,1,228 FD 12/18/17,
18854,CC011,"231,232x233",0,1,0,9/8/17,9/8/17,11/2/17,11/22/17,1,75,75,,,75,NA,7,12/12/17,5,2,,,7,0,1,1,,
18854,CC011,"231,232x233",0,1,0,9/8/17,9/8/17,11/2/17,11/28/17,2,81,81,,,NA,NA,7,12/27/17,2,5,,,7,0,1,1,,
18854,CC011,"231,232x233",0,1,0,9/8/17,9/8/17,11/2/17,12/19/17,3,102,102,,,NA,NA,7,1/17/18,5,2,,,7,0,1,1,,
18854,CC011,"231,232x233",0,1,0,9/8/17,9/8/17,11/2/17,3/1/18,4,174,174,,,NA,NA,3,3/21/18,1,2,,,3,0,1,1,,
18854,CC011,234x235,1,0,0,9/8/17,9/8/17,11/2/17,NA,1,NA,NA,,,NA,NA,0,NA,0,0,0,,0,0,1,0,,
18854,CC011,236x237,1,0,0,9/19/17,9/19/17,11/7/17,12/20/17,1,92,92,,,92,NA,4,1/17/18,3,0,,,3,1,1,1,1 AH,
18854,CC011,236x237,1,0,0,9/19/17,9/19/17,11/7/17,1/10/18,2,113,113,,,NA,21,10,2/7/18,5,5,,,10,0,1,1,,
18854,CC011,236x237,1,0,0,9/19/17,9/19/17,11/7/17,2/6/18,3,140,140,,,NA,27,3,NA,0,0,,,0,3,1,0,missing,
28409,CC012,"01,02x03",0,1,0,6/3/16,6/3/16,7/14/16,9/6/16,1,95,95,,,95,NA,4,9/30/16,2,2,0,,4,0,1,1,,
28409,CC012,"01,02x03",0,1,0,6/3/16,6/3/16,7/14/16,10/23/16,2,142,142,,,NA,NA,3,11/17/16,2,0,1,1 missing,2,1,1,1,1 missing,
28409,CC012,"01,02x03",0,1,0,6/3/16,6/3/16,7/14/16,11/6/16,3,156,156,,,NA,NA,2,NA,0,0,2,runts,0,2,1,0,runts,
28409,CC012,"01,02x03",0,1,0,6/3/16,6/3/16,7/14/16,12/1/16,4,181,181,,,NA,NA,4,12/29/16,1,1,2,2 missing,2,2,1,1,2 missing,
28409,CC012,"01,02x03",0,1,0,6/3/16,6/3/16,7/14/16,12/16/16,5,196,196,,,NA,NA,1,NA,0,0,1,,0,1,1,0,,
28409,CC012,"01,02x03",0,1,0,6/3/16,6/3/16,7/14/16,12/28/16,6,208,208,,,NA,NA,3,1/18/17,2,1,0,,3,0,1,1,,
28409,CC012,"01,02x03",0,1,0,6/3/16,6/3/16,7/14/16,1/13/17,7,224,224,,,NA,NA,2,2/3/17,1,1,0,,2,0,1,1,,
28409,CC012,"01,02x03",0,1,0,6/3/16,6/3/16,7/14/16,1/25/17,8,236,236,,,NA,NA,1,2/17/17,1,0,0,,1,0,1,1,,
28409,CC012,"01,02x03",0,1,0,6/3/16,6/3/16,7/14/16,2/17/17,9,259,259,,,NA,NA,2,3/9/17,1,1,0,retired breeders 4/13/17,2,0,1,1,retired breeders 4/13/17,
28409,CC012,"04,05x06",0,1,0,6/13/16,6/13/16,7/14/16,8/25/16,1,73,73,,,73,NA,11,9/14/16,3,7,1,missing,10,1,1,1,missing,
28409,CC012,"04,05x06",0,1,0,6/13/16,6/13/16,7/14/16,9/18/16,2,97,97,9/20/16,,NA,NA,8,10/13/16,6,2,0,,8,0,2,2,,
28409,CC012,"04,05x06",0,1,0,6/13/16,6/13/16,7/14/16,10/15/16,3,124,124,10/19/16,,NA,NA,8,11/10/16,4,3,1,,7,1,2,2,,
28409,CC012,"04,05x06",0,1,0,6/13/16,6/13/16,7/14/16,11/9/16,4,149,149,,,NA,NA,7,12/1/16,2,5,0,,7,0,1,1,,
28409,CC012,"04,05x06",0,1,0,6/13/16,6/13/16,7/14/16,12/9/16,5,179,179,,,NA,NA,7,12/29/16,3,4,0,,7,0,1,1,,
28409,CC012,"04,05x06",0,1,0,6/13/16,6/13/16,7/14/16,1/2/17,6,203,203,,,NA,NA,3,1/27/17,2,1,0,,3,0,1,1,,
28409,CC012,"04,05x06",0,1,0,6/13/16,6/13/16,7/14/16,2/2/17,7,234,234,,,NA,NA,4,2/23/17,0,4,0,retired breeders 4/13/17,4,0,1,1,retired breeders 4/13/17,
28409,CC012,"07,08x09",0,1,0,6/13/16,6/13/16,7/14/16,8/15/16,1,63,63,,,63,NA,5,9/8/16,3,2,0,,5,0,1,1,,
28409,CC012,"07,08x09",0,1,0,6/13/16,6/13/16,7/14/16,8/21/16,2,69,69,,,NA,NA,5,9/14/16,2,3,0,,5,0,1,1,,
28409,CC012,"07,08x09",0,1,0,6/13/16,6/13/16,7/14/16,9/11/16,3,90,90,,,NA,NA,1,10/6/16,0,1,0,,1,0,1,1,,
28409,CC012,"07,08x09",0,1,0,6/13/16,6/13/16,7/14/16,9/16/16,4,95,95,,,NA,NA,2,10/6/16,0,1,1,1 missing,1,1,1,1,1 missing,
28409,CC012,"07,08x09",0,1,0,6/13/16,6/13/16,7/14/16,10/2/16,5,111,111,,,NA,NA,5,10/27/16,2,3,0,,5,0,1,1,,
28409,CC012,"07,08x09",0,1,0,6/13/16,6/13/16,7/14/16,10/8/16,6,117,117,,,NA,NA,4,11/10/16,1,0,3,3 missing,1,3,1,1,3 missing,
28409,CC012,"07,08x09",0,1,0,6/13/16,6/13/16,7/14/16,10/25/16,7,134,134,10/29/16,,NA,NA,6,11/17/16,0,4,2,missing,4,2,2,2,missing,
28409,CC012,"07,08x09",0,1,0,6/13/16,6/13/16,7/14/16,11/15/16,8,155,155,,,NA,NA,3,12/8/16,2,1,0,,3,0,1,1,,
28409,CC012,"100,101x102",0,1,0,3/24/17,3/24/17,4/13/17,6/26/17,1,94,94,,,94,NA,6,7/19/17,2,4,0,,6,0,1,1,,
28409,CC012,"100,101x102",0,1,0,3/24/17,3/24/17,4/13/17,7/21/17,2,119,119,,,NA,NA,5,8/10/17,1,4,0,,5,0,1,1,,
28409,CC012,"100,101x102",0,1,0,3/24/17,3/24/17,4/13/17,7/24/17,3,122,122,,,NA,NA,1,8/16/17,1,0,0,,1,0,1,1,,
28409,CC012,"100,101x102",0,1,0,3/24/17,3/24/17,4/13/17,8/16/17,4,145,145,8/18/17,,NA,NA,10,9/8/17,5,5,0,,10,0,2,2,,
28409,CC012,"100,101x102",0,1,0,3/24/17,3/24/17,4/13/17,9/10/17,5,170,170,9/13/17,,NA,NA,7,10/6/17,3,4,0,,7,0,2,2,,
28409,CC012,"100,101x102",0,1,0,3/24/17,3/24/17,4/13/17,10/7/17,6,197,197,,,NA,NA,9,11/2/17,3,6,0,,9,0,1,1,,
28409,CC012,"100,101x102",0,1,0,3/24/17,3/24/17,4/13/17,11/3/17,7,224,224,,,NA,NA,2,11/30/17,2,0,0,,2,0,1,1,,
28409,CC012,"100,101x102",0,1,0,3/24/17,3/24/17,4/13/17,11/27/17,8,248,248,,,NA,NA,5,12/20/17,3,2,0,,5,0,1,1,,
28409,CC012,"100,101x102",0,1,0,3/24/17,3/24/17,4/13/17,12/2/17,9,253,253,,,NA,NA,4,12/28/17,2,1,1,,3,1,1,1,,
28409,CC012,"100,101x102",0,1,0,3/24/17,3/24/17,4/13/17,12/23/17,10,274,274,,,NA,NA,3,1/7/18,1,2,0,,3,0,1,1,,
28409,CC012,"100,101x102",0,1,0,3/24/17,3/24/17,4/13/17,12/30/17,11,281,281,,,NA,NA,5,1/31/18,2,1,2,,3,2,1,1,,
28409,CC012,"100,101x102",0,1,0,3/24/17,3/24/17,4/13/17,2/12/18,12,325,325,,,NA,NA,2,3/7/18,1,1,0,,2,0,1,1,,
28409,CC012,"100,101x102",0,1,0,3/24/17,3/24/17,4/13/17,3/7/18,13,348,348,,,NA,NA,5,4/5/18,4,1,0,,5,0,1,1,,
28409,CC012,"103,104x105",0,1,0,3/30/17,3/30/17,4/20/17,NA,1,NA,NA,,,NA,NA,0,NA,0,0,0,0,0,0,1,0,,
28409,CC012,"106,107x108",0,1,0,3/27/17,3/27/17,4/20/17,6/11/17,1,76,76,,,76,NA,6,7/6/17,2,4,0,,6,0,1,1,,
28409,CC012,"106,107x108",0,1,0,3/27/17,3/27/17,4/20/17,6/18/17,2,83,83,,,NA,NA,4,7/14/17,2,1,1,1 missing,3,1,1,1,1 missing,
28409,CC012,"106,107x108",0,1,0,3/27/17,3/27/17,4/20/17,7/14/17,3,109,109,7/18/17,,NA,NA,8,8/10/17,3,5,0,,8,0,2,2,,
28409,CC012,"106,107x108",0,1,0,3/27/17,3/27/17,4/20/17,8/8/17,4,134,134,,,NA,NA,6,8/30/17,4,1,1,1 runt,5,1,1,1,1 runt,
28409,CC012,"109,110x111",0,1,0,4/10/17,4/10/17,5/5/17,NA,1,NA,NA,,,NA,NA,0,NA,0,0,0,,0,0,1,0,,
28409,CC012,10x11,1,0,0,6/14/16,6/14/16,7/21/16,8/31/16,1,78,78,,,78,NA,4,9/23/16,2,2,0,,4,0,1,1,,
28409,CC012,10x11,1,0,0,6/14/16,6/14/16,7/21/16,9/25/16,2,103,103,,,NA,25,4,10/21/16,3,1,0,,4,0,1,1,,
28409,CC012,"112,113x114",0,1,0,4/8/17,4/8/17,5/5/17,NA,1,NA,NA,,,NA,NA,0,NA,0,0,0,,0,0,1,0,,
28409,CC012,"115,116x117",0,1,0,4/13/17,4/13/17,5/5/17,7/3/17,1,81,81,,,81,NA,1,7/28/17,1,0,,,1,0,1,1,,
28409,CC012,"115,116x117",0,1,0,4/13/17,4/13/17,5/5/17,7/15/17,2,93,93,,,NA,NA,4,8/10/17,2,2,,,4,0,1,1,,
28409,CC012,"115,116x117",0,1,0,4/13/17,4/13/17,5/5/17,7/25/17,3,103,103,,,NA,NA,3,8/29/17,1,2,,,3,0,1,1,,
28409,CC012,"115,116x117",0,1,0,4/13/17,4/13/17,5/5/17,8/10/17,4,119,119,,,NA,NA,4,8/30/17,3,0,,,3,1,1,1,1 missing ,
28409,CC012,"115,116x117",0,1,0,4/13/17,4/13/17,5/5/17,8/20/17,5,129,129,,,NA,NA,2,9/15/17,0,2,,,2,0,1,1,,
28409,CC012,"115,116x117",0,1,0,4/13/17,4/13/17,5/5/17,9/4/17,6,144,144,,,NA,NA,3,9/29/17,0,3,,,3,0,1,1,,
28409,CC012,"115,116x117",0,1,0,4/13/17,4/13/17,5/5/17,9/15/17,7,155,155,,,NA,NA,5,10/6/17,1,4,,,5,0,1,1,,
28409,CC012,"115,116x117",0,1,0,4/13/17,4/13/17,5/5/17,9/29/17,8,169,169,,,NA,NA,2,10/27/17,2,0,,,2,0,1,1,,
28409,CC012,"115,116x117",0,1,0,4/13/17,4/13/17,5/5/17,10/10/17,9,180,180,,,NA,NA,2,11/2/17,0,0,,,0,2,1,0,missing,
28409,CC012,"115,116x117",0,1,0,4/13/17,4/13/17,5/5/17,11/5/17,10,206,206,,,NA,NA,8,12/5/17,3,5,,,8,0,1,1,,
28409,CC012,"115,116x117",0,1,0,4/13/17,4/13/17,5/5/17,12/4/17,11,235,235,,,NA,NA,3,12/28/17,2,1,,,3,0,1,1,,
28409,CC012,"115,116x117",0,1,0,4/13/17,4/13/17,5/5/17,1/4/18,12,266,266,,,NA,NA,3,1/31/18,0,3,,,3,0,1,1,,
28409,CC012,"115,116x117",0,1,0,4/13/17,4/13/17,5/5/17,1/25/18,13,287,287,,,NA,NA,3,2/14/18,1,2,,,3,0,1,1,,
28409,CC012,"115,116x117",0,1,0,4/13/17,4/13/17,5/5/17,1/30/18,14,292,292,,,NA,NA,3,4/5/18,0,0,,,0,3,1,0,missing?,
28409,CC012,"115,116x117",0,1,0,4/13/17,4/13/17,5/5/17,2/20/18,15,313,313,,,NA,NA,1,3/20/18,0,1,,,1,0,1,1,,
28409,CC012,"115,116x117",0,1,0,4/13/17,4/13/17,5/5/17,3/15/18,16,336,336,,,NA,NA,3,4/11/18,1,2,,,3,0,1,1,,
28409,CC012,"115,116x117",0,1,0,4/13/17,4/13/17,5/5/17,3/20/18,17,341,341,,,NA,NA,3,4/17/18,3,0,,,3,0,1,1,,
28409,CC012,"118,119x120",0,1,0,5/17/17,5/17/17,6/16/17,8/2/17,1,77,77,,,77,NA,1,8/24/17,1,0,,,1,0,1,1,,
28409,CC012,"118,119x120",0,1,0,5/17/17,5/17/17,6/16/17,8/12/17,2,87,87,,,NA,NA,3,9/8/17,1,2,,,3,0,1,1,,
28409,CC012,"118,119x120",0,1,0,5/17/17,5/17/17,6/16/17,8/25/17,3,100,100,,,NA,NA,8,9/14/17,4,2,,,6,2,1,1,,
28409,CC012,"118,119x120",0,1,0,5/17/17,5/17/17,6/16/17,10/12/17,4,148,148,,,NA,NA,6,11/2/17,0,6,,,6,0,1,1,,
28409,CC012,"118,119x120",0,1,0,5/17/17,5/17/17,6/16/17,11/8/17,5,175,175,,,NA,NA,5,11/19/17,0,0,,,0,5,1,0,missing,
28409,CC012,"118,119x120",0,1,0,5/17/17,5/17/17,6/16/17,12/1/17,6,198,198,,,NA,NA,3,12/28/17,3,0,,,3,0,1,1,,
28409,CC012,"118,119x120",0,1,0,5/17/17,5/17/17,6/16/17,12/26/17,7,223,223,,,NA,NA,1,1/17/18,1,0,,,1,0,1,1,,
28409,CC012,"118,119x120",0,1,0,5/17/17,5/17/17,6/16/17,1/30/18,8,258,258,,,NA,NA,3,2/14/18,0,3,,,3,0,1,1,,
28409,CC012,"118,119x120",0,1,0,5/17/17,5/17/17,6/16/17,2/17/18,9,276,276,,,NA,NA,1,3/20/18,0,1,,,1,0,1,1,,
28409,CC012,"118,119x120",0,1,0,5/17/17,5/17/17,6/16/17,3/17/18,10,304,304,,,NA,NA,1,NA,0,0,,,0,1,1,0,,
28409,CC012,"118,119x120",0,1,0,5/17/17,5/17/17,6/16/17,3/29/18,11,316,316,,,NA,NA,2,4/24/18,1,1,,,2,0,1,1,,
28409,CC012,"118,119x120",0,1,0,5/17/17,5/17/17,6/16/17,4/22/18,12,340,340,,,NA,NA,1,5/22/18,0,1,,,1,0,1,1,,
28409,CC012,"12,13x14",0,1,0,8/15/16,8/15/16,9/8/16,NA,1,NA,NA,,,NA,NA,0,NA,0,0,,,0,0,1,0,nonproductive,
28409,CC012,"121,122x123",0,1,0,5/13/16,5/13/16,6/16/16,NA,1,NA,NA,,,NA,NA,0,NA,0,0,0,,0,0,1,0,,
28409,CC012,"124,125x126",0,1,0,6/10/17,6/10/17,7/6/17,9/3/17,1,85,85,,,85,NA,3,9/29/17,1,2,0,,3,0,1,1,,
28409,CC012,"124,125x126",0,1,0,6/10/17,6/10/17,7/6/17,9/28/17,2,110,110,,,NA,NA,7,10/27/17,4,3,0,,7,0,1,1,,
28409,CC012,"124,125x126",0,1,0,6/10/17,6/10/17,7/6/17,10/19/17,3,131,131,,,NA,NA,4,11/8/17,2,2,0,,4,0,1,1,,
28409,CC012,"124,125x126",0,1,0,6/10/17,6/10/17,7/6/17,10/27/17,4,139,139,,,NA,NA,6,11/15/17,3,3,0,,6,0,1,1,,
28409,CC012,"124,125x126",0,1,0,6/10/17,6/10/17,7/6/17,11/16/17,5,159,159,,,NA,NA,2,12/13/17,0,2,0,,2,0,1,1,,
28409,CC012,"124,125x126",0,1,0,6/10/17,6/10/17,7/6/17,12/5/17,6,178,178,,,NA,NA,5,12/28/17,2,3,0,,5,0,1,1,,
28409,CC012,"124,125x126",0,1,0,6/10/17,6/10/17,7/6/17,12/31/17,7,204,204,,,NA,NA,1,NA,0,0,1,missing,0,1,1,0,missing,
28409,CC012,"124,125x126",0,1,0,6/10/17,6/10/17,7/6/17,2/16/18,8,251,251,,,NA,NA,1,3/20/18,1,0,0,126 FD 1/2/18,1,0,1,1,126 FD 1/2/18,
28409,CC012,"127,128x129",0,1,0,6/16/17,6/16/17,7/6/17,9/8/17,1,84,84,,,84,NA,4,9/29/17,2,0,2,,2,2,1,1,,
28409,CC012,"127,128x129",0,1,0,6/16/17,6/16/17,7/6/17,9/29/17,2,105,105,,,NA,NA,3,10/27/17,2,0,1,1 runt,2,1,1,1,1 runt,
28409,CC012,"127,128x129",0,1,0,6/16/17,6/16/17,7/6/17,10/19/17,3,125,125,,,NA,NA,6,11/8/17,4,2,0,,6,0,1,1,,
28409,CC012,"127,128x129",0,1,0,6/16/17,6/16/17,7/6/17,10/24/17,4,130,130,,,NA,NA,4,11/15/17,3,1,0,,4,0,1,1,,
28409,CC012,"127,128x129",0,1,0,6/16/17,6/16/17,7/6/17,11/16/17,5,153,153,,,NA,NA,7,12/13/17,4,3,0,,7,0,1,1,,
28409,CC012,"127,128x129",0,1,0,6/16/17,6/16/17,7/6/17,12/13/17,6,180,180,,,NA,NA,10,1/4/18,5,4,1,1 missing,9,1,1,1,1 missing,
28409,CC012,"127,128x129",0,1,0,6/16/17,6/16/17,7/6/17,1/27/18,7,225,225,,,NA,NA,6,2/21/18,4,2,0,,6,0,1,1,,
28409,CC012,"127,128x129",0,1,0,6/16/17,6/16/17,7/6/17,2/25/18,8,254,254,,,NA,NA,6,3/27/18,4,2,0,2/26/18 DU,6,0,1,1,2/26/18 DU,
28409,CC012,"130,131x132",0,1,0,7/8/17,7/8/17,8/10/17,NA,1,NA,NA,,,NA,NA,0,NA,0,0,,,0,0,1,0,,
28409,CC012,"133,134x135",0,1,0,7/18/17,7/18/17,8/10/17,NA,1,NA,NA,,,NA,NA,0,NA,0,0,,,0,0,1,0,,
28409,CC012,"136,137x138",0,1,0,8/25/17,8/25/17,9/15/17,NA,1,NA,NA,,,NA,NA,0,NA,0,0,,,0,0,1,0,,
28409,CC012,"139,140x141",0,1,0,8/25/17,8/25/17,9/15/17,12/14/17,1,111,111,,,111,NA,6,1/4/18,4,2,,,6,0,1,1,,
28409,CC012,"139,140x141",0,1,0,8/25/17,8/25/17,9/15/17,1/10/18,2,138,138,,,NA,NA,5,1/17/18,0,0,,,0,5,1,0,,
28409,CC012,"139,140x141",0,1,0,8/25/17,8/25/17,9/15/17,2/10/18,3,169,169,,,NA,NA,7,3/7/18,5,2,,,7,0,1,1,,
28409,CC012,"139,140x141",0,1,0,8/25/17,8/25/17,9/15/17,3/8/18,4,195,195,,,NA,NA,3,4/5/18,1,1,,,2,1,1,1,,
28409,CC012,"139,140x141",0,1,0,8/25/17,8/25/17,9/15/17,3/23/18,5,210,210,,,NA,NA,5,4/17/18,1,4,,,5,0,1,1,,
28409,CC012,"139,140x141",0,1,0,8/25/17,8/25/17,9/15/17,4/20/18,6,238,238,,,NA,NA,9,5/15/18,3,6,,,9,0,1,1,,
28409,CC012,"139,140x141",0,1,0,8/25/17,8/25/17,9/15/17,5/19/18,7,267,267,,,NA,NA,2,6/19/18,0,2,,,2,0,1,1,,
28409,CC012,"139,140x141",0,1,0,8/25/17,8/25/17,9/15/17,6/13/18,8,292,292,,,NA,NA,3,7/10/18,0,3,,,3,0,1,1,139 FD 4/24/18,
28409,CC012,142x143,1,0,0,9/10/17,9/10/17,10/6/17,NA,1,NA,NA,,,NA,NA,0,NA,0,0,,,0,0,1,0,,
28409,CC012,"144,145x146",0,1,0,9/12/17,9/12/17,10/6/17,12/2/17,1,81,81,,,81,NA,9,12/28/17,3,6,,,9,0,1,1,,
28409,CC012,"144,145x146",0,1,0,9/12/17,9/12/17,10/6/17,12/28/17,2,107,107,,,NA,NA,7,1/15/18,0,0,,,0,7,1,0,missing,
28409,CC012,"144,145x146",0,1,0,9/12/17,9/12/17,10/6/17,1/13/18,3,123,123,,,NA,NA,4,2/7/18,2,2,,,4,0,1,1,,
28409,CC012,"144,145x146",0,1,0,9/12/17,9/12/17,10/6/17,1/18/18,4,128,128,,,NA,NA,6,2/7/18,4,2,,,6,0,1,1,,
28409,CC012,"144,145x146",0,1,0,9/12/17,9/12/17,10/6/17,2/7/18,5,148,148,,,NA,NA,3,3/7/18,0,0,,,0,3,1,0,1 male FD,
28409,CC012,"144,145x146",0,1,0,9/12/17,9/12/17,10/6/17,2/12/18,6,153,153,,,NA,NA,6,3/7/18,2,4,,,6,0,1,1,,
28409,CC012,"144,145x146",0,1,0,9/12/17,9/12/17,10/6/17,3/22/18,7,191,191,,,NA,NA,4,4/17/18,2,2,,,4,0,1,1,,
28409,CC012,"144,145x146",0,1,0,9/12/17,9/12/17,10/6/17,4/17/18,8,217,217,,,NA,NA,4,5/15/18,2,2,,,4,0,1,1,,
28409,CC012,"144,145x146",0,1,0,9/12/17,9/12/17,10/6/17,4/23/18,9,223,223,,,NA,NA,5,5/22/18,3,2,,,5,0,1,1,,
28409,CC012,"144,145x146",0,1,0,9/12/17,9/12/17,10/6/17,5/12/18,10,242,242,,,NA,NA,6,6/13/18,3,2,,,5,1,1,1,1 male runt,
28409,CC012,"144,145x146",0,1,0,9/12/17,9/12/17,10/6/17,6/1/18,11,262,262,,,NA,NA,4,6/27/18,1,3,,,4,0,1,1,,
28409,CC012,"144,145x146",0,1,0,9/12/17,9/12/17,10/6/17,6/5/18,12,266,266,,,NA,NA,5,7/5/18,2,3,,,5,0,1,1,,
28409,CC012,"147,148x149",0,1,0,9/24/17,9/24/17,10/18/17,NA,1,NA,NA,,,NA,NA,0,NA,0,0,,,0,0,1,0,nonproductive,
28409,CC012,150x151,1,0,0,9/28/17,9/28/17,10/27/17,NA,1,NA,NA,,,NA,NA,0,NA,0,0,,,0,0,1,0,nonproductive,
28409,CC012,"152,153x154",0,1,0,9/28/17,9/28/17,10/27/17,1/4/18,1,98,98,,,98,NA,4,1/31/18,0,3,1,1 missing,3,1,1,1,1 missing,
28409,CC012,"152,153x154",0,1,0,9/28/17,9/28/17,10/27/17,2/16/18,2,141,141,,,NA,NA,4,3/20/18,0,3,1,,3,1,1,1,,
28409,CC012,"152,153x154",0,1,0,9/28/17,9/28/17,10/27/17,4/10/18,3,194,194,,,NA,NA,2,5/8/18,1,1,0,,2,0,1,1,,
28409,CC012,"152,153x154",0,1,0,9/28/17,9/28/17,10/27/17,5/5/18,4,219,219,,,NA,NA,4,6/5/18,1,3,0,,4,0,1,1,,
28409,CC012,"152,153x154",0,1,0,9/28/17,9/28/17,10/27/17,6/5/18,5,250,250,,,NA,NA,1,NA,0,0,1,missing,0,1,1,0,missing,
28409,CC012,"155,156x157",0,1,0,10/9/17,10/9/17,11/2/17,12/25/17,1,77,77,,,77,NA,4,1/17/18,1,2,1,1 missing,3,1,1,1,1 missing,
28409,CC012,"155,156x157",0,1,0,10/9/17,10/9/17,11/2/17,1/5/18,2,88,88,,,NA,NA,5,1/31/18,1,2,2,2 missing,3,2,1,1,2 missing,
28409,CC012,"155,156x157",0,1,0,10/9/17,10/9/17,11/2/17,1/18/18,3,101,101,,,NA,NA,7,2/7/18,2,5,0,,7,0,1,1,,
28409,CC012,"155,156x157",0,1,0,10/9/17,10/9/17,11/2/17,1/30/18,4,113,113,,,NA,NA,1,NA,0,0,1,missing,0,1,1,0,missing,
28409,CC012,"155,156x157",0,1,0,10/9/17,10/9/17,11/2/17,2/12/18,5,126,126,,,NA,NA,3,3/7/18,2,1,0,,3,0,1,1,,
28409,CC012,"155,156x157",0,1,0,10/9/17,10/9/17,11/2/17,3/8/18,6,150,150,,,NA,NA,3,4/5/18,3,0,0,,3,0,1,1,,
28409,CC012,"155,156x157",0,1,0,10/9/17,10/9/17,11/2/17,3/10/18,7,152,152,,,NA,NA,4,4/5/18,0,4,0,,4,0,1,1,,
28409,CC012,"155,156x157",0,1,0,10/9/17,10/9/17,11/2/17,3/31/18,8,173,173,,,NA,NA,4,5/2/18,2,2,0,,4,0,1,1,,
28409,CC012,"155,156x157",0,1,0,10/9/17,10/9/17,11/2/17,4/5/18,9,178,178,,,NA,NA,7,5/2/18,4,3,0,,7,0,1,1,,
28409,CC012,"155,156x157",0,1,0,10/9/17,10/9/17,11/2/17,4/27/18,10,200,200,,,NA,NA,5,5/20/18,2,3,0,,5,0,1,1,,
28409,CC012,"155,156x157",0,1,0,10/9/17,10/9/17,11/2/17,5/3/18,11,206,206,,,NA,NA,2,5/30/18,1,1,0,,2,0,1,1,,
28409,CC012,"155,156x157",0,1,0,10/9/17,10/9/17,11/2/17,5/22/18,12,225,225,,,NA,NA,2,6/19/18,2,0,0,,2,0,1,1,,
28409,CC012,"155,156x157",0,1,0,10/9/17,10/9/17,11/2/17,6/10/18,13,244,244,,,NA,NA,4,7/10/18,4,0,0,,4,0,1,1,,
28409,CC012,"155,156x157",0,1,0,10/9/17,10/9/17,11/2/17,6/29/18,14,263,263,,,NA,NA,4,7/24/18,1,3,0,,4,0,1,1,,
28409,CC012,"155,156x157",0,1,0,10/9/17,10/9/17,11/2/17,7/4/18,15,268,268,,,NA,NA,5,8/1/18,1,4,0,,5,0,1,1,,
28409,CC012,15x16,1,0,0,8/15/16,8/15/16,9/8/16,10/29/16,1,75,75,,,75,NA,3,11/22/16,2,1,0,,3,0,1,1,,
28409,CC012,15x16,1,0,0,8/15/16,8/15/16,9/8/16,11/21/16,2,98,98,,,NA,23,6,12/19/16,2,4,0,,6,0,1,1,,
28409,CC012,15x16,1,0,0,8/15/16,8/15/16,9/8/16,12/16/16,3,123,123,,,NA,25,4,1/12/17,1,3,0,,4,0,1,1,,
28409,CC012,15x16,1,0,0,8/15/16,8/15/16,9/8/16,2/13/17,4,182,182,,,NA,59,4,3/9/17,0,4,0,,4,0,1,1,,
28409,CC012,15x16,1,0,0,8/15/16,8/15/16,9/8/16,3/22/17,5,219,219,,,NA,37,1,4/13/17,1,0,0,,1,0,1,1,,
28409,CC012,15x16,1,0,0,8/15/16,8/15/16,9/8/16,4/17/17,6,245,245,,,NA,26,2,5/12/17,2,0,0,,2,0,1,1,,
28409,CC012,15x16,1,0,0,8/15/16,8/15/16,9/8/16,5/13/17,7,271,271,,,NA,26,5,6/16/17,4,1,0,,5,0,1,1,,
28409,CC012,"161,162x163",0,1,0,10/19/17,10/19/17,12/5/17,1/5/18,1,78,78,1/8/18,,78,NA,8,1/31/18,1,6,1,1 missing,7,1,2,2,1 missing,
28409,CC012,"161,162x163",0,1,0,10/19/17,10/19/17,12/5/17,1/31/18,2,104,104,,,NA,NA,3,2/21/18,0,0,3,2 missing; 1 escaped,0,3,1,0,2 missing; 1 escaped,
28409,CC012,"161,162x163",0,1,0,10/19/17,10/19/17,12/5/17,2/3/18,3,107,107,,,NA,NA,6,2/28/18,3,3,0,,6,0,1,1,,
28409,CC012,"161,162x163",0,1,0,10/19/17,10/19/17,12/5/17,3/2/18,4,134,134,,,NA,NA,7,3/27/18,1,6,0,,7,0,1,1,,
28409,CC012,"161,162x163",0,1,0,10/19/17,10/19/17,12/5/17,3/12/18,5,144,144,,,NA,NA,2,4/5/18,0,1,1,1 missing,1,1,1,1,1 missing,
28409,CC012,"161,162x163",0,1,0,10/19/17,10/19/17,12/5/17,3/31/18,6,163,163,,,NA,NA,6,5/2/18,3,3,0,,6,0,1,1,,
28409,CC012,"161,162x163",0,1,0,10/19/17,10/19/17,12/5/17,4/9/18,7,172,172,,,NA,NA,6,5/8/18,2,3,1,1 missing,5,1,1,1,1 missing,
28409,CC012,"161,162x163",0,1,0,10/19/17,10/19/17,12/5/17,6/9/18,8,233,233,,,NA,NA,2,7/10/18,1,1,0,,2,0,1,1,,
28409,CC012,"161,162x163",0,1,0,10/19/17,10/19/17,12/5/17,7/1/18,9,255,255,,,NA,NA,5,8/1/18,2,2,1,1 FD,4,1,1,1,1 FD,
28409,CC012,"161,162x163",0,1,0,10/19/17,10/19/17,12/5/17,7/28/18,10,282,282,,,NA,NA,2,8/30/18,0,2,0,,2,0,1,1,,
28409,CC012,"161,162x163",0,1,0,10/19/17,10/19/17,12/5/17,8/20/18,11,305,305,,,NA,NA,1,NA,0,0,1,,0,1,1,0,,
28409,CC012,"164,165x166",0,1,0,10/16/17,10/16/17,12/5/17,1/6/18,1,82,82,,,82,NA,3,1/31/18,2,1,0,,3,0,1,1,,
28409,CC012,"164,165x166",0,1,0,10/16/17,10/16/17,12/5/17,2/2/18,2,109,109,,,NA,NA,5,2/21/18,2,2,1,1 missing,4,1,1,1,1 missing,
28409,CC012,"164,165x166",0,1,0,10/16/17,10/16/17,12/5/17,3/22/18,3,157,157,,,NA,NA,5,4/17/18,0,3,2,2 missing,3,2,1,1,2 missing,
28409,CC012,"164,165x166",0,1,0,10/16/17,10/16/17,12/5/17,4/17/18,4,183,183,,,NA,NA,3,5/15/18,0,3,0,,3,0,1,1,,
28409,CC012,"164,165x166",0,1,0,10/16/17,10/16/17,12/5/17,5/11/18,5,207,207,,,NA,NA,5,6/5/18,3,2,0,166 FD 5/1/18,5,0,1,1,166 FD 5/1/18,
28409,CC012,"167,168x169",0,1,0,11/7/17,11/7/17,12/20/17,1/18/18,1,72,72,,,72,NA,5,2/7/18,4,1,0,,5,0,1,1,,
28409,CC012,"167,168x169",0,1,0,11/7/17,11/7/17,12/20/17,1/26/18,2,80,80,,,NA,NA,2,2/14/18,0,2,0,,2,0,1,1,,
28409,CC012,"167,168x169",0,1,0,11/7/17,11/7/17,12/20/17,2/13/18,3,98,98,,,NA,NA,4,3/7/18,1,3,0,,4,0,1,1,,
28409,CC012,"167,168x169",0,1,0,11/7/17,11/7/17,12/20/17,2/18/18,4,103,103,,,NA,NA,5,3/20/18,1,4,0,,5,0,1,1,,
28409,CC012,"167,168x169",0,1,0,11/7/17,11/7/17,12/20/17,3/23/18,5,136,136,,,NA,NA,6,4/17/18,4,2,0,,6,0,1,1,,
28409,CC012,"167,168x169",0,1,0,11/7/17,11/7/17,12/20/17,3/31/18,6,144,144,,,NA,NA,3,5/2/18,0,2,1,1 missing,2,1,1,1,1 missing,
28409,CC012,"167,168x169",0,1,0,11/7/17,11/7/17,12/20/17,4/21/18,7,165,165,,,NA,NA,4,5/22/18,2,2,0,,4,0,1,1,,
28409,CC012,"167,168x169",0,1,0,11/7/17,11/7/17,12/20/17,4/29/18,8,173,173,,,NA,NA,5,6/13/18,2,3,0,,5,0,1,1,,
28409,CC012,"167,168x169",0,1,0,11/7/17,11/7/17,12/20/17,5/14/18,9,188,188,,,NA,NA,2,NA,0,0,2,missing,0,2,1,0,missing,
28409,CC012,"167,168x169",0,1,0,11/7/17,11/7/17,12/20/17,5/24/18,10,198,198,,,NA,NA,6,6/19/18,3,3,0,,6,0,1,1,,
28409,CC012,"167,168x169",0,1,0,11/7/17,11/7/17,12/20/17,6/28/18,11,233,233,,,NA,NA,5,7/24/18,3,2,0,,5,0,1,1,,
28409,CC012,"167,168x169",0,1,0,11/7/17,11/7/17,12/20/17,7/24/18,12,259,259,,,NA,NA,6,8/22/18,2,4,0,,6,0,1,1,,
28409,CC012,"167,168x169",0,1,0,11/7/17,11/7/17,12/20/17,8/21/18,13,287,287,,,NA,NA,2,9/18/18,1,1,0,,2,0,1,1,,
28409,CC012,"17,18x19",0,1,0,8/25/16,8/25/16,9/14/16,12/3/16,1,100,100,,,100,NA,5,12/29/16,2,3,0,,5,0,1,1,,
28409,CC012,"17,18x19",0,1,0,8/25/16,8/25/16,9/14/16,12/10/16,2,107,107,,,NA,NA,5,1/6/17,4,1,0,,5,0,1,1,,
28409,CC012,"17,18x19",0,1,0,8/25/16,8/25/16,9/14/16,1/5/17,3,133,133,,,NA,NA,6,1/27/17,2,4,0,,6,0,1,1,,
28409,CC012,"17,18x19",0,1,0,8/25/16,8/25/16,9/14/16,1/31/17,4,159,159,,,NA,NA,2,2/23/17,2,0,0,,2,0,1,1,,
28409,CC012,"17,18x19",0,1,0,8/25/16,8/25/16,9/14/16,2/24/17,5,183,183,,,NA,NA,3,3/16/17,2,1,0,,3,0,1,1,,
28409,CC012,"17,18x19",0,1,0,8/25/16,8/25/16,9/14/16,3/28/17,6,215,215,,,NA,NA,1,NA,0,0,1,runt,0,1,1,0,runt,
28409,CC012,"17,18x19",0,1,0,8/25/16,8/25/16,9/14/16,4/29/17,7,247,247,5/4/17,,NA,NA,3,NA,2,1,0,no wean date on card; retired breeders 4/20/17,3,0,2,2,no wean date on card; retired breeders 4/20/17,
28409,CC012,170x171,1,0,0,11/7/17,11/7/17,12/20/17,2/10/18,1,95,95,,,95,NA,4,3/7/18,3,1,0,,4,0,1,1,,
28409,CC012,170x171,1,0,0,11/7/17,11/7/17,12/20/17,3/8/18,2,121,121,,,NA,26,4,4/5/18,3,1,0,,4,0,1,1,,
28409,CC012,170x171,1,0,0,11/7/17,11/7/17,12/20/17,4/4/18,3,148,148,,,NA,27,1,NA,0,0,1,missing,0,1,1,0,missing,
28409,CC012,"172,173x174",0,1,0,11/8/17,11/8/17,12/20/17,1/28/18,1,81,81,,,81,NA,5,2/28/18,2,0,3,4 missing,2,3,1,1,4 missing,
28409,CC012,"172,173x174",0,1,0,11/8/17,11/8/17,12/20/17,2/2/18,2,86,86,,,NA,NA,1,NA,0,0,1,,0,1,1,0,,
28409,CC012,"172,173x174",0,1,0,11/8/17,11/8/17,12/20/17,2/27/18,3,111,111,,,NA,NA,5,3/20/18,3,2,0,,5,0,1,1,,
28409,CC012,"172,173x174",0,1,0,11/8/17,11/8/17,12/20/17,3/17/18,4,129,129,,,NA,NA,3,4/17/18,2,0,1,1 FD,2,1,1,1,1 FD,
28409,CC012,"172,173x174",0,1,0,11/8/17,11/8/17,12/20/17,4/22/18,5,165,165,,,NA,NA,7,5/26/18,1,6,0,,7,0,1,1,,
28409,CC012,"172,173x174",0,1,0,11/8/17,11/8/17,12/20/17,5/19/18,6,192,192,,,NA,NA,2,6/19/18,1,1,0,,2,0,1,1,,
28409,CC012,"172,173x174",0,1,0,11/8/17,11/8/17,12/20/17,6/18/18,7,222,222,,,NA,NA,2,7/10/18,0,2,0,172 FD 7/9/18,2,0,1,1,172 FD 7/9/18,
28409,CC012,175x176,1,0,0,11/8/17,11/8/17,12/20/17,1/28/18,1,81,81,,,81,NA,4,2/28/18,1,3,0,,4,0,1,1,,
28409,CC012,175x176,1,0,0,11/8/17,11/8/17,12/20/17,2/23/18,2,107,107,,,NA,26,3,3/20/18,2,0,1,1 missing,2,1,1,1,1 missing,
28409,CC012,175x176,1,0,0,11/8/17,11/8/17,12/20/17,4/2/18,3,145,145,,,NA,38,1,5/2/18,0,1,0,,1,0,1,1,,
28409,CC012,175x176,1,0,0,11/8/17,11/8/17,12/20/17,4/28/18,4,171,171,,,NA,26,3,5/30/18,2,1,0,,3,0,1,1,,
28409,CC012,175x176,1,0,0,11/8/17,11/8/17,12/20/17,5/22/18,5,195,195,,,NA,24,2,6/19/18,1,1,0,,2,0,1,1,,
28409,CC012,175x176,1,0,0,11/8/17,11/8/17,12/20/17,6/18/18,6,222,222,,,NA,27,5,7/18/18,1,2,2,2 missing,3,2,1,1,2 missing,
28409,CC012,"177,178x179",0,1,0,11/16/17,11/16/17,12/20/17,2/2/18,1,78,78,,,78,NA,3,2/21/18,1,1,1,missing,2,1,1,1,missing,
28409,CC012,"177,178x179",0,1,0,11/16/17,11/16/17,12/20/17,2/9/18,2,85,85,,,NA,NA,4,3/7/18,2,1,1,,3,1,1,1,,
28409,CC012,"177,178x179",0,1,0,11/16/17,11/16/17,12/20/17,2/28/18,3,104,104,,,NA,NA,3,3/27/18,1,2,0,,3,0,1,1,,
28409,CC012,"177,178x179",0,1,0,11/16/17,11/16/17,12/20/17,3/4/18,4,108,108,,,NA,NA,4,4/5/18,2,0,2,,2,2,1,1,,
28409,CC012,"177,178x179",0,1,0,11/16/17,11/16/17,12/20/17,4/5/18,5,140,140,,,NA,NA,5,5/2/18,3,2,0,,5,0,1,1,,
28409,CC012,"177,178x179",0,1,0,11/16/17,11/16/17,12/20/17,4/11/18,6,146,146,,,NA,NA,5,5/8/18,1,4,0,,5,0,1,1,,
28409,CC012,"177,178x179",0,1,0,11/16/17,11/16/17,12/20/17,5/1/18,7,166,166,,,NA,NA,4,NA,0,0,4,missing,0,4,1,0,missing,
28409,CC012,"177,178x179",0,1,0,11/16/17,11/16/17,12/20/17,5/19/18,8,184,184,,,NA,NA,4,6/19/18,1,2,1,missing,3,1,1,1,missing,
28409,CC012,"177,178x179",0,1,0,11/16/17,11/16/17,12/20/17,6/11/18,9,207,207,,,NA,NA,3,7/10/18,0,2,1,missing,2,1,1,1,missing,
28409,CC012,"177,178x179",0,1,0,11/16/17,11/16/17,12/20/17,8/16/18,10,273,273,,,NA,NA,4,9/11/18,4,0,0,177 FD 6/5/18,4,0,1,1,177 FD 6/5/18,
28409,CC012,"183,184x185",0,1,0,11/27/17,11/27/17,1/17/18,2/15/18,1,80,80,,,80,NA,2,3/20/18,2,0,0,,2,0,1,1,,
28409,CC012,"183,184x185",0,1,0,11/27/17,11/27/17,1/17/18,2/19/18,2,84,84,,,NA,NA,5,3/20/18,0,5,0,,5,0,1,1,,
28409,CC012,"183,184x185",0,1,0,11/27/17,11/27/17,1/17/18,3/16/18,3,109,109,,,NA,NA,5,4/11/18,3,2,0,,5,0,1,1,,
28409,CC012,"183,184x185",0,1,0,11/27/17,11/27/17,1/17/18,3/31/18,4,124,124,,,NA,NA,4,5/2/18,0,4,0,,4,0,1,1,,
28409,CC012,"183,184x185",0,1,0,11/27/17,11/27/17,1/17/18,4/12/18,5,136,136,,,NA,NA,4,5/8/18,1,3,0,,4,0,1,1,,
28409,CC012,"183,184x185",0,1,0,11/27/17,11/27/17,1/17/18,5/30/18,6,184,184,,,NA,NA,4,7/5/18,1,3,0,,4,0,1,1,,
28409,CC012,"183,184x185",0,1,0,11/27/17,11/27/17,1/17/18,6/9/18,7,194,194,,,NA,NA,4,NA,0,0,4,4 missing,0,4,1,0,4 missing,
28409,CC012,"183,184x185",0,1,0,11/27/17,11/27/17,1/17/18,6/23/18,8,208,208,,,NA,NA,4,7/24/18,1,2,1,1 missing; 185 FD 6/27/18,3,1,1,1,1 missing; 185 FD 6/27/18,
28409,CC012,186x187,1,0,0,11/27/17,11/27/17,1/17/18,3/16/18,1,109,109,,,109,NA,4,4/11/18,1,3,0,,4,0,1,1,,
28409,CC012,186x187,1,0,0,11/27/17,11/27/17,1/17/18,4/8/18,2,132,132,,,NA,23,8,5/8/18,5,3,0,,8,0,1,1,,
28409,CC012,186x187,1,0,0,11/27/17,11/27/17,1/17/18,5/7/18,3,161,161,,,NA,29,1,NA,0,0,1,1 missing,0,1,1,0,1 missing,
28409,CC012,186x187,1,0,0,11/27/17,11/27/17,1/17/18,6/27/18,4,212,212,,,NA,51,5,7/24/18,1,4,0,,5,0,1,1,,
28409,CC012,197x198,1,0,0,12/5/17,12/5/17,1/17/18,2/20/18,1,77,77,,,77,NA,2,3/20/18,1,1,,,2,0,1,1,,
28409,CC012,197x198,1,0,0,12/5/17,12/5/17,1/17/18,3/17/18,2,102,102,,,NA,25,3,4/17/18,0,3,,,3,0,1,1,,
28409,CC012,197x198,1,0,0,12/5/17,12/5/17,1/17/18,4/10/18,3,126,126,,,NA,24,2,5/8/18,0,2,,,2,0,1,1,,
28409,CC012,197x198,1,0,0,12/5/17,12/5/17,1/17/18,5/2/18,4,148,148,,,NA,22,4,5/30/18,4,0,,,4,0,1,1,198 male missing 6/12/18,
28409,CC012,207x208,1,0,0,12/2/17,12/2/17,1/17/18,2/15/18,1,75,75,,,75,NA,3,3/14/18,2,1,0,,3,0,1,1,,
28409,CC012,207x208,1,0,0,12/2/17,12/2/17,1/17/18,3/10/18,2,98,98,,,NA,23,6,4/11/18,1,3,2,,4,2,1,1,,
28409,CC012,207x208,1,0,0,12/2/17,12/2/17,1/17/18,4/6/18,3,125,125,,,NA,27,3,5/2/18,1,2,0,,3,0,1,1,,
28409,CC012,207x208,1,0,0,12/2/17,12/2/17,1/17/18,5/2/18,4,151,151,,,NA,26,3,5/30/18,2,0,1,,2,1,1,1,,
28409,CC012,207x208,1,0,0,12/2/17,12/2/17,1/17/18,5/24/18,5,173,173,,,NA,22,3,6/19/18,1,2,0,,3,0,1,1,,
28409,CC012,207x208,1,0,0,12/2/17,12/2/17,1/17/18,6/18/18,6,198,198,,,NA,25,3,7/18/18,3,0,0,,3,0,1,1,,
28409,CC012,207x208,1,0,0,12/2/17,12/2/17,1/17/18,7/27/18,7,237,237,,,NA,39,2,8/22/18,0,2,0,,2,0,1,1,,
28409,CC012,"22,23x24",0,1,0,8/21/16,8/21/16,9/14/16,NA,1,NA,NA,,,NA,NA,0,NA,0,0,,,0,0,1,0,nonproductive,
28409,CC012,"25,26x27",0,1,0,9/6/16,9/6/16,9/30/16,12/10/16,1,95,95,,,95,NA,2,1/6/17,1,1,0,,2,0,1,1,,
28409,CC012,"25,26x27",0,1,0,9/6/16,9/6/16,9/30/16,12/26/16,2,111,111,,,NA,NA,3,1/18/17,2,0,1,,2,1,1,1,,
28409,CC012,"25,26x27",0,1,0,9/6/16,9/6/16,9/30/16,1/18/17,3,134,134,,,NA,NA,2,2/8/17,1,1,0,,2,0,1,1,,
28409,CC012,"25,26x27",0,1,0,9/6/16,9/6/16,9/30/16,1/22/17,4,138,138,,,NA,NA,4,2/17/17,0,4,0,,4,0,1,1,,
28409,CC012,"25,26x27",0,1,0,9/6/16,9/6/16,9/30/16,2/12/17,5,159,159,2/17/17,,NA,NA,4,3/9/17,2,2,0,,4,0,2,2,,
28409,CC012,"25,26x27",0,1,0,9/6/16,9/6/16,9/30/16,4/22/17,6,228,228,,,NA,NA,3,5/18/17,1,1,1,1 missing,2,1,1,1,1 missing,
28409,CC012,"25,26x27",0,1,0,9/6/16,9/6/16,9/30/16,5/17/17,7,253,253,,,NA,NA,8,6/16/17,3,5,0,,8,0,1,1,,
28409,CC012,"25,26x27",0,1,0,9/6/16,9/6/16,9/30/16,6/13/17,8,280,280,,,NA,NA,4,NA,0,0,4,retired breeders 5/25/17,0,4,1,0,retired breeders 5/25/17,
28409,CC012,"28,29x30",0,1,0,9/19/16,9/19/16,10/13/16,NA,1,NA,NA,,,NA,NA,0,NA,0,0,,,0,0,1,0,nonproductive,
28409,CC012,"31,32x33",0,1,0,9/19/16,9/19/16,10/13/16,NA,1,NA,NA,,,NA,NA,0,NA,0,0,,,0,0,1,0,nonproductive,
28409,CC012,"34,35x36",0,1,0,8/31/16,8/31/16,10/21/16,12/19/16,1,110,110,,,110,NA,3,1/12/17,1,2,0,,3,0,1,1,,
28409,CC012,"34,35x36",0,1,0,8/31/16,8/31/16,10/21/16,1/10/17,2,132,132,,,NA,NA,3,2/3/17,1,2,0,,3,0,1,1,,
28409,CC012,"34,35x36",0,1,0,8/31/16,8/31/16,10/21/16,1/16/17,3,138,138,,,NA,NA,1,NA,0,0,1,,0,1,1,0,,
28409,CC012,"34,35x36",0,1,0,8/31/16,8/31/16,10/21/16,2/3/17,4,156,156,,,NA,NA,4,2/23/17,3,1,0,,4,0,1,1,,
28409,CC012,"34,35x36",0,1,0,8/31/16,8/31/16,10/21/16,2/28/17,5,181,181,,,NA,NA,2,3/22/17,2,0,0,,2,0,1,1,,
28409,CC012,"34,35x36",0,1,0,8/31/16,8/31/16,10/21/16,6/15/17,6,288,288,,,NA,NA,2,NA,0,0,2,34 sick 2/27/17,0,2,1,0,34 sick 2/27/17,
28409,CC012,"37,38x39",0,1,0,9/25/16,9/25/16,10/21/16,NA,1,NA,NA,,,NA,NA,0,NA,0,0,,,0,0,1,0,nonproductive,
28409,CC012,"40,41x42",0,1,0,10/2/16,10/2/16,10/27/16,NA,1,NA,NA,,,NA,NA,0,NA,0,0,,,0,0,1,0,nonproductive,
28409,CC012,"49,50x51",0,1,0,10/29/16,10/29/16,11/22/16,NA,1,NA,NA,,,NA,NA,0,NA,0,0,,,0,0,1,0,49 sick 11/30/16; 50 derm 4/27/17,
28409,CC012,"52,53x54",0,1,0,11/9/16,11/9/16,12/1/16,1/16/17,1,68,68,,,68,NA,4,2/8/17,2,1,1,1 FD,3,1,1,1,1 FD,
28409,CC012,"52,53x54",0,1,0,11/9/16,11/9/16,12/1/16,2/8/17,2,91,91,,,NA,NA,8,3/3/17,6,2,0,,8,0,1,1,,
28409,CC012,"52,53x54",0,1,0,11/9/16,11/9/16,12/1/16,3/9/17,3,120,120,,,NA,NA,3,3/21/17,1,2,0,,3,0,1,1,,
28409,CC012,"52,53x54",0,1,0,11/9/16,11/9/16,12/1/16,4/6/17,4,148,148,,,NA,NA,3,4/27/17,0,3,0,,3,0,1,1,,
28409,CC012,"52,53x54",0,1,0,11/9/16,11/9/16,12/1/16,5/2/17,5,174,174,,,NA,NA,5,5/25/17,4,1,0,,5,0,1,1,,
28409,CC012,"52,53x54",0,1,0,11/9/16,11/9/16,12/1/16,5/29/17,6,201,201,,,NA,NA,4,6/23/17,1,3,0,,4,0,1,1,,
28409,CC012,"52,53x54",0,1,0,11/9/16,11/9/16,12/1/16,7/2/17,7,235,235,,,NA,NA,3,7/28/17,1,1,1,1 disc runt,2,1,1,1,1 disc runt,
28409,CC012,"52,53x54",0,1,0,11/9/16,11/9/16,12/1/16,8/2/17,8,266,266,,,NA,NA,5,8/24/17,0,5,0,52 FD 8/7/17; retired breeders 8/1/17,5,0,1,1,52 FD 8/7/17; retired breeders 8/1/17,
28409,CC012,"55,56x57",0,1,0,11/15/16,11/15/16,12/8/16,NA,1,NA,NA,,,NA,NA,0,NA,0,0,,,0,0,1,0,nonproductive,
28409,CC012,"58,59x60",0,1,0,11/21/16,11/21/16,12/14/16,NA,1,NA,NA,,,NA,NA,0,NA,0,0,,,0,0,1,0,nonproductive,
28409,CC012,"61,62x63",0,1,0,12/10/16,12/10/16,1/6/17,3/17/17,1,97,97,,,97,NA,3,4/5/17,0,3,0,,3,0,1,1,,
28409,CC012,"61,62x63",0,1,0,12/10/16,12/10/16,1/6/17,4/13/17,2,124,124,,,NA,NA,6,5/5/17,2,4,0,,6,0,1,1,,
28409,CC012,"61,62x63",0,1,0,12/10/16,12/10/16,1/6/17,5/13/17,3,154,154,,,NA,NA,4,6/19/17,2,2,0,,4,0,1,1,,
28409,CC012,"61,62x63",0,1,0,12/10/16,12/10/16,1/6/17,6/4/17,4,176,176,6/7/17,,NA,NA,6,6/30/17,2,3,1,1 missing,5,1,2,2,1 missing,
28409,CC012,"61,62x63",0,1,0,12/10/16,12/10/16,1/6/17,6/30/17,5,202,202,,,NA,NA,3,NA,0,0,3,63 FD 6/20/17,0,3,1,0,63 FD 6/20/17,
28409,CC012,64x65,1,0,0,12/19/16,12/19/16,1/12/17,NA,1,NA,NA,,,NA,NA,0,NA,0,0,,,0,0,1,0,nonproductive,
28409,CC012,66x67,1,0,0,12/16/16,12/16/16,1/12/17,3/15/17,1,89,89,,,89,NA,3,4/5/17,2,1,0,,3,0,1,1,,
28409,CC012,66x67,1,0,0,12/16/16,12/16/16,1/12/17,4/10/17,2,115,115,,,NA,26,6,5/5/17,2,3,1,1 missing,5,1,1,1,1 missing,
28409,CC012,66x67,1,0,0,12/16/16,12/16/16,1/12/17,6/9/17,3,175,175,,,NA,60,6,6/20/17,3,3,0,,6,0,1,1,,
28409,CC012,66x67,1,0,0,12/16/16,12/16/16,1/12/17,7/6/17,4,202,202,,,NA,27,4,NA,0,0,4,4 missing,0,4,1,0,4 missing,
28409,CC012,66x67,1,0,0,12/16/16,12/16/16,1/12/17,8/3/17,5,230,230,,,NA,28,5,8/24/17,3,2,0,,5,0,1,1,,
28409,CC012,66x67,1,0,0,12/16/16,12/16/16,1/12/17,9/2/17,6,260,260,,,NA,30,4,9/29/17,2,2,0,,4,0,1,1,,
28409,CC012,66x67,1,0,0,12/16/16,12/16/16,1/12/17,9/28/17,7,286,286,,,NA,26,5,10/27/17,1,2,2,2 missing,3,2,1,1,2 missing,
28409,CC012,66x67,1,0,0,12/16/16,12/16/16,1/12/17,10/24/17,8,312,312,,,NA,26,3,NA,0,0,3,retired breeders 10/6/17,0,3,1,0,retired breeders 10/6/17,
28409,CC012,"68,69x70",0,1,0,12/6/16,12/6/16,1/18/17,2/12/17,1,68,68,,,68,NA,8,3/9/17,5,3,0,,8,0,1,1,,
28409,CC012,"68,69x70",0,1,0,12/6/16,12/6/16,1/18/17,3/12/17,2,96,96,,,NA,NA,2,4/5/17,0,2,0,,2,0,1,1,,
28409,CC012,"68,69x70",0,1,0,12/6/16,12/6/16,1/18/17,3/30/17,3,114,114,,,NA,NA,5,4/20/17,2,3,0,,5,0,1,1,,
28409,CC012,"68,69x70",0,1,0,12/6/16,12/6/16,1/18/17,4/7/17,4,122,122,,,NA,NA,5,4/27/17,2,2,1,,4,1,1,1,,
28409,CC012,"68,69x70",0,1,0,12/6/16,12/6/16,1/18/17,4/24/17,5,139,139,,,NA,NA,4,5/18/17,1,0,3,2 missing; 1 FD,1,3,1,1,2 missing; 1 FD,
28409,CC012,"68,69x70",0,1,0,12/6/16,12/6/16,1/18/17,5/5/17,6,150,150,,,NA,NA,4,5/25/17,2,2,0,,4,0,1,1,,
28409,CC012,"68,69x70",0,1,0,12/6/16,12/6/16,1/18/17,5/14/17,7,159,159,,,NA,NA,1,6/16/17,1,0,0,,1,0,1,1,,
28409,CC012,"68,69x70",0,1,0,12/6/16,12/6/16,1/18/17,5/30/17,8,175,175,,,NA,NA,2,6/23/17,2,0,0,,2,0,1,1,,
28409,CC012,"71,72x73",0,1,0,12/6/16,12/6/16,1/18/17,2/25/17,1,81,81,2/28/17,,81,NA,6,3/22/17,3,3,0,,6,0,2,2,,
28409,CC012,"71,72x73",0,1,0,12/6/16,12/6/16,1/18/17,3/25/17,2,109,109,,,NA,NA,6,4/20/17,6,0,0,,6,0,1,1,,
28409,CC012,"71,72x73",0,1,0,12/6/16,12/6/16,1/18/17,4/8/17,3,123,123,,,NA,NA,8,5/5/17,3,1,4,4 missing,4,4,1,1,4 missing,
28409,CC012,"71,72x73",0,1,0,12/6/16,12/6/16,1/18/17,4/29/17,4,144,144,5/3/17,,NA,NA,8,5/25/17,3,5,0,,8,0,2,2,,
28409,CC012,"71,72x73",0,1,0,12/6/16,12/6/16,1/18/17,5/27/17,5,172,172,5/29/17,,NA,NA,7,6/23/17,2,5,0,,7,0,2,2,,
28409,CC012,"71,72x73",0,1,0,12/6/16,12/6/16,1/18/17,6/22/17,6,198,198,,,NA,NA,3,7/14/17,2,1,0,,3,0,1,1,,
28409,CC012,"74,75x76",0,1,0,12/6/16,12/6/16,1/18/17,2/27/17,1,83,83,,,83,NA,2,3/22/17,0,2,0,,2,0,1,1,,
28409,CC012,"74,75x76",0,1,0,12/6/16,12/6/16,1/18/17,3/4/17,2,88,88,,,NA,NA,4,3/31/17,1,3,0,,4,0,1,1,,
28409,CC012,"74,75x76",0,1,0,12/6/16,12/6/16,1/18/17,3/24/17,3,108,108,,,NA,NA,5,4/13/17,4,1,0,,5,0,1,1,,
28409,CC012,"74,75x76",0,1,0,12/6/16,12/6/16,1/18/17,3/30/17,4,114,114,,,NA,NA,4,4/20/17,2,0,2,1 missing; 1 runt,2,2,1,1,1 missing; 1 runt,
28409,CC012,"74,75x76",0,1,0,12/6/16,12/6/16,1/18/17,4/20/17,5,135,135,,,NA,NA,3,5/12/17,3,0,0,,3,0,1,1,,
28409,CC012,"74,75x76",0,1,0,12/6/16,12/6/16,1/18/17,4/25/17,6,140,140,,,NA,NA,5,5/18/17,1,4,0,,5,0,1,1,,
28409,CC012,"74,75x76",0,1,0,12/6/16,12/6/16,1/18/17,5/17/17,7,162,162,5/22/17,,NA,NA,10,10/16/17,4,4,2,missing,8,2,2,2,missing,
28409,CC012,"74,75x76",0,1,0,12/6/16,12/6/16,1/18/17,6/14/17,8,190,190,,,NA,NA,2,7/14/17,1,1,0,retired breeders 10/6/17,2,0,1,1,retired breeders 10/6/17,
28409,CC012,"77,78x79",0,1,0,12/28/16,12/28/16,1/18/17,NA,1,NA,NA,,,NA,NA,0,NA,0,0,,,0,0,1,0,nonproductive,
28409,CC012,80x81,1,0,0,1/10/17,1/10/17,2/3/17,NA,1,NA,NA,,,NA,NA,0,NA,0,0,,,0,0,1,0,nonproductive,
28409,CC012,82x83,1,0,0,1/13/17,1/13/17,2/3/17,3/27/17,1,73,73,,,73,NA,4,4/20/17,2,2,0,0,4,0,1,1,,
28409,CC012,82x83,1,0,0,1/13/17,1/13/17,2/3/17,4/21/17,2,98,98,,,NA,25,7,5/12/17,1,6,0,0,7,0,1,1,,
28409,CC012,82x83,1,0,0,1/13/17,1/13/17,2/3/17,5/15/17,3,122,122,,,NA,24,3,6/16/17,1,2,0,0,3,0,1,1,,
28409,CC012,82x83,1,0,0,1/13/17,1/13/17,2/3/17,6/11/17,4,149,149,,,NA,27,7,7/6/17,1,6,0,0,7,0,1,1,,
28409,CC012,82x83,1,0,0,1/13/17,1/13/17,2/3/17,7/10/17,5,178,178,,,NA,29,6,8/10/17,4,1,1,0,5,1,1,1,,
28409,CC012,82x83,1,0,0,1/13/17,1/13/17,2/3/17,8/9/17,6,208,208,,,NA,30,5,NA,NA,NA,NA,NA,NA,NA,1,0,female found dead 8/20/17,
28409,CC012,"84,85x86",0,1,0,1/16/17,1/16/17,2/8/17,4/7/17,1,81,81,,,81,NA,2,4/27/17,1,1,0,,2,0,1,1,,
28409,CC012,"84,85x86",0,1,0,1/16/17,1/16/17,2/8/17,4/28/17,2,102,102,,,NA,NA,5,5/18/17,2,2,1,1 missing,4,1,1,1,1 missing,
28409,CC012,"84,85x86",0,1,0,1/16/17,1/16/17,2/8/17,5/16/17,3,120,120,,,NA,NA,1,NA,0,0,1,missing,0,1,1,0,missing,
28409,CC012,"84,85x86",0,1,0,1/16/17,1/16/17,2/8/17,5/27/17,4,131,131,,,NA,NA,4,6/23/17,3,0,1,1 runt,3,1,1,1,1 runt,
28409,CC012,"84,85x86",0,1,0,1/16/17,1/16/17,2/8/17,7/13/17,5,178,178,,,NA,NA,4,8/10/17,2,2,0,,4,0,1,1,,
28409,CC012,"84,85x86",0,1,0,1/16/17,1/16/17,2/8/17,9/18/17,6,245,245,,,NA,NA,2,10/12/17,1,1,0,,2,0,1,1,,
28409,CC012,"84,85x86",0,1,0,1/16/17,1/16/17,2/8/17,10/14/17,7,271,271,,,NA,NA,1,NA,0,0,1,missing; retired breeders 10/27/17,0,1,1,0,missing; retired breeders 10/27/17,
28409,CC012,87x88,1,0,0,1/16/17,1/16/17,2/8/17,5/27/17,1,131,131,,,131,NA,2,6/23/17,1,1,0,,2,0,1,1,,
28409,CC012,87x88,1,0,0,1/16/17,1/16/17,2/8/17,6/16/17,2,151,151,,,NA,20,4,7/6/17,3,1,0,,4,0,1,1,,
28409,CC012,87x88,1,0,0,1/16/17,1/16/17,2/8/17,7/12/17,3,177,177,,,NA,26,5,8/10/17,4,1,0,,5,0,1,1,,
28409,CC012,87x88,1,0,0,1/16/17,1/16/17,2/8/17,9/10/17,4,237,237,,,NA,60,6,10/6/17,1,3,2,,4,2,1,1,,
28409,CC012,87x88,1,0,0,1/16/17,1/16/17,2/8/17,10/9/17,5,266,266,,,NA,29,4,NA,0,0,4,2 missing; retired breeders 10/27/1,0,4,1,0,2 missing; retired breeders 10/27/1,
28409,CC012,89x90,1,0,0,1/18/17,1/18/17,2/8/17,6/10/17,1,143,143,,,143,NA,4,7/6/17,3,1,0,,4,0,1,1,,
28409,CC012,89x90,1,0,0,1/18/17,1/18/17,2/8/17,7/4/17,2,167,167,,,NA,24,3,7/28/17,2,0,1,1 missing,2,1,1,1,1 missing,
28409,CC012,89x90,1,0,0,1/18/17,1/18/17,2/8/17,7/27/17,3,190,190,,,NA,23,6,8/10/17,3,3,0,,6,0,1,1,,
28409,CC012,89x90,1,0,0,1/18/17,1/18/17,2/8/17,8/26/17,4,220,220,,,NA,30,5,9/21/17,0,3,2,1 missing; 1 runt,3,2,1,1,1 missing; 1 runt,
28409,CC012,89x90,1,0,0,1/18/17,1/18/17,2/8/17,9/21/17,5,246,246,,,NA,26,6,10/12/17,3,2,1,1 missing,5,1,1,1,1 missing,
28409,CC012,89x90,1,0,0,1/18/17,1/18/17,2/8/17,10/20/17,6,275,275,,,NA,29,2,11/8/17,1,1,0,retired breeders 10/27/17,2,0,1,1,retired breeders 10/27/17,
28409,CC012,"91,92x93",0,1,0,2/8/17,2/8/17,3/3/17,5/13/17,1,94,94,,,94,NA,3,6/16/17,1,2,0,,3,0,1,1,,
28409,CC012,"91,92x93",0,1,0,2/8/17,2/8/17,3/3/17,6/5/17,2,117,117,,,NA,NA,5,6/30/17,2,3,0,,5,0,1,1,,
28409,CC012,"91,92x93",0,1,0,2/8/17,2/8/17,3/3/17,6/30/17,3,142,142,,,NA,NA,6,7/19/17,3,2,1,1 missing,5,1,1,1,1 missing,
28409,CC012,"91,92x93",0,1,0,2/8/17,2/8/17,3/3/17,7/25/17,4,167,167,,,NA,NA,4,8/16/17,0,3,1,missing,3,1,1,1,missing,
28409,CC012,"91,92x93",0,1,0,2/8/17,2/8/17,3/3/17,8/12/17,5,185,185,,,NA,NA,4,9/8/17,1,3,0,,4,0,1,1,,
28409,CC012,"91,92x93",0,1,0,2/8/17,2/8/17,3/3/17,8/21/17,6,194,194,,,NA,NA,6,9/15/17,2,1,3,3 missing,3,3,1,1,3 missing,
28409,CC012,"91,92x93",0,1,0,2/8/17,2/8/17,3/3/17,9/7/17,7,211,211,,,NA,NA,5,9/29/17,2,3,0,,5,0,1,1,,
28409,CC012,"91,92x93",0,1,0,2/8/17,2/8/17,3/3/17,9/16/17,8,220,220,,,NA,NA,5,10/12/17,2,1,2,2 missing,3,2,1,1,2 missing,
28409,CC012,"91,92x93",0,1,0,2/8/17,2/8/17,3/3/17,10/12/17,9,246,246,,,NA,NA,3,11/2/17,1,2,0,,3,0,1,1,,
28409,CC012,"91,92x93",0,1,0,2/8/17,2/8/17,3/3/17,10/16/17,10,250,250,,,NA,NA,5,11/8/17,2,3,0,,5,0,1,1,,
28409,CC012,"91,92x93",0,1,0,2/8/17,2/8/17,3/3/17,11/6/17,11,271,271,,,NA,NA,3,12/5/17,2,1,0,,3,0,1,1,,
28409,CC012,"91,92x93",0,1,0,2/8/17,2/8/17,3/3/17,11/10/17,12,275,275,,,NA,NA,3,12/5/17,1,2,0,retired breeders 10/27/17,3,0,1,1,retired breeders 10/27/17,
28409,CC012,"94,95x96",0,1,0,2/8/17,2/8/17,3/3/17,NA,1,NA,NA,,,NA,NA,0,NA,0,0,0,0,0,0,1,0,,
28409,CC012,"97,98x99",0,1,0,3/15/17,3/15/17,4/5/17,6/11/17,1,88,88,,,88,NA,3,7/6/17,3,0,,,3,0,1,1,,
28409,CC012,"97,98x99",0,1,0,3/15/17,3/15/17,4/5/17,7/4/17,2,111,111,7/6/17,,NA,NA,11,7/28/17,4,7,,,11,0,2,2,,
28409,CC012,"97,98x99",0,1,0,3/15/17,3/15/17,4/5/17,8/3/17,3,141,141,,,NA,NA,3,8/24/17,0,3,,,3,0,1,1,,
28409,CC012,"97,98x99",0,1,0,3/15/17,3/15/17,4/5/17,8/23/17,4,161,161,,,NA,NA,5,9/15/17,2,2,,,4,1,1,1,1 missing,
28409,CC012,"97,98x99",0,1,0,3/15/17,3/15/17,4/5/17,8/28/17,5,166,166,,,NA,NA,3,9/21/17,0,3,,,3,0,1,1,,
28409,CC012,"97,98x99",0,1,0,3/15/17,3/15/17,4/5/17,9/24/17,6,193,193,,,NA,NA,5,10/18/17,2,3,,,5,0,1,1,,
28409,CC012,"97,98x99",0,1,0,3/15/17,3/15/17,4/5/17,10/1/17,7,200,200,,,NA,NA,3,10/27/17,0,2,,,2,1,1,1,1 runt,
28409,CC012,"97,98x99",0,1,0,3/15/17,3/15/17,4/5/17,10/21/17,8,220,220,,,NA,NA,2,11/15/17,1,0,,,1,1,1,1,1 missing,
28409,CC012,"97,98x99",0,1,0,3/15/17,3/15/17,4/5/17,10/27/17,9,226,226,,,NA,NA,5,11/15/17,3,2,,,5,0,1,1,,
28409,CC012,"97,98x99",0,1,0,3/15/17,3/15/17,4/5/17,11/12/17,10,242,242,,,NA,NA,3,NA,0,0,,,0,3,1,0,missing,
28409,CC012,"97,98x99",0,1,0,3/15/17,3/15/17,4/5/17,12/7/17,11,267,267,,,NA,NA,5,12/28/17,1,3,,,4,1,1,1,,
28409,CC012,"97,98x99",0,1,0,3/15/17,3/15/17,4/5/17,12/15/17,12,275,275,,,NA,NA,4,1/4/18,2,2,,,4,0,1,1,,
28409,CC012,"97,98x99",0,1,0,3/15/17,3/15/17,4/5/17,1/2/18,13,293,293,,,NA,NA,4,1/31/18,1,2,,,3,1,1,1,,
28409,CC012,"97,98x99",0,1,0,3/15/17,3/15/17,4/5/17,1/28/18,14,319,319,,,NA,NA,2,2/20/18,1,1,,,2,0,1,1,,
28409,CC012,"97,98x99",0,1,0,3/15/17,3/15/17,4/5/17,2/3/18,15,325,325,,,NA,NA,6,2/28/18,2,3,,,5,1,1,1,1 missing,
28409,CC012,"97,98x99",0,1,0,3/15/17,3/15/17,4/5/17,2/20/18,16,342,342,,,NA,NA,3,3/20/18,1,2,,,3,0,1,1,,
28409,CC012,"97,98x99",0,1,0,3/15/17,3/15/17,4/5/17,3/2/18,17,352,352,,,NA,NA,6,3/27/18,0,1,,,1,5,1,1,"3 FD, 2 missing",
28409,CC012,"97,98x99",0,1,0,3/15/17,3/15/17,4/5/17,3/22/18,18,372,372,,,NA,NA,3,4/17/18,2,1,,,3,0,1,1,,
21892,CC013,105x106,1,0,0,10/19/16,10/19/16,11/11/16,1/3/17,1,76,76,,,76,NA,9,NA,0,0,,,0,9,1,0,,
21892,CC013,"107,108x109",0,1,0,11/12/16,11/12/16,12/8/16,1/30/17,1,79,79,,,79,NA,8,2/23/17,6,2,0,,8,0,1,1,,
21892,CC013,"110,111x112",0,1,0,11/12/16,11/12/16,12/8/16,1/24/17,1,73,73,,,73,NA,4,2/16/17,4,0,0,,4,0,1,1,,
21892,CC013,"110,111x112",0,1,0,11/12/16,11/12/16,12/8/16,2/11/17,2,91,91,,,NA,NA,8,3/8/17,4,4,0,,8,0,1,1,,
21892,CC013,"110,111x112",0,1,0,11/12/16,11/12/16,12/8/16,4/30/17,3,169,169,,,NA,NA,7,5/26/17,2,4,1,1 missing; 110 FD 2/15/17,6,1,1,1,1 missing; 110 FD 2/15/17,
21892,CC013,"113,114x115",0,1,0,12/11/16,12/11/16,1/5/17,2/10/17,1,61,61,2/14/17,,61,NA,9,3/8/17,7,1,1,1 missing; 113 FD 4/17/17,8,1,2,2,1 missing; 113 FD 4/17/17,
21892,CC013,"116,117x118",0,1,0,12/21/16,12/21/16,1/12/17,3/5/17,1,74,74,,,74,NA,7,3/30/17,4,2,1,1 FD,6,1,1,1,1 FD,
21892,CC013,"116,117x118",0,1,0,12/21/16,12/21/16,1/12/17,3/21/17,2,90,90,,,NA,NA,4,4/12/17,3,1,0,116 FD 4/11/17,4,0,1,1,116 FD 4/11/17,
21892,CC013,119x120,1,0,0,12/27/16,12/27/16,1/20/17,3/8/17,1,71,71,,,71,NA,5,3/30/17,3,2,,,5,0,1,1,,
21892,CC013,119x120,1,0,0,12/27/16,12/27/16,1/20/17,4/30/17,2,124,124,,,NA,53,5,NA,0,0,,,0,5,1,0,,
21892,CC013,"124,125x126",0,1,0,1/20/17,1/20/17,2/9/17,4/19/17,1,89,89,,,89,NA,7,5/12/17,6,1,,,7,0,1,1,,
21892,CC013,"124,125x126",0,1,0,1/20/17,1/20/17,2/9/17,4/29/17,2,99,99,,,NA,NA,2,5/23/17,0,2,,,2,0,1,1,,
21892,CC013,"124,125x126",0,1,0,1/20/17,1/20/17,2/9/17,5/31/17,3,131,131,,,NA,NA,7,6/23/17,1,6,,,7,0,1,1,,
21892,CC013,"124,125x126",0,1,0,1/20/17,1/20/17,2/9/17,6/26/17,4,157,157,,,NA,NA,5,NA,0,0,,,0,5,1,0,124 FD 5/23/17,
21892,CC013,"127,128x129",0,1,0,2/2/17,2/2/17,2/23/17,NA,1,NA,NA,,,NA,NA,0,NA,0,0,0,,0,0,1,0,,
21892,CC013,"130,131x132",0,1,0,2/2/17,2/2/17,2/23/17,4/17/17,1,74,74,,,74,NA,11,5/7/17,6,5,0,,11,0,1,1,,
21892,CC013,"133,134x135",0,1,0,1/7/17,1/7/17,3/8/17,3/28/17,1,80,80,,,80,NA,8,4/20/17,2,3,NA,NA,5,3,1,1,chewed tails,
21892,CC013,"133,134x135",0,1,0,1/13/17,1/13/17,2/3/17,4/21/17,2,98,98,,,NA,NA,8,5/12/17,6,2,0,0,8,0,1,1,,
21892,CC013,"143,144x145",0,1,0,3/22/17,3/22/17,4/12/17,8/1/17,1,132,132,,,132,NA,4,NA,0,0,4,missing,0,4,1,0,missing,
21892,CC013,"146,147x148",0,1,0,3/21/17,3/21/17,4/12/17,5/31/17,1,71,71,,,71,NA,11,6/23/17,10,1,0,0,11,0,1,1,,
21892,CC013,"146,147x148",0,1,0,3/21/17,3/21/17,4/12/17,7/10/17,2,111,111,7/12/17,,NA,NA,7,8/2/17,4,3,0,0,7,0,2,2,,
21892,CC013,"149,150x151",0,1,0,4/17/17,4/17/17,5/17/17,7/12/17,1,86,86,,,86,NA,4,NA,NA,NA,0,0,NA,NA,1,0,chewed tails; 1 female FD 8/1; 1 female FD 8/22,
21892,CC013,"155,156x17",0,1,0,5/16/17,5/16/17,6/29/17,7/26/17,1,71,71,,,71,NA,3,8/16/17,2,1,0,short tails,3,0,1,1,short tails,
21892,CC013,"155,156x17",0,1,0,5/16/17,5/16/17,6/29/17,8/16/17,2,92,92,,,NA,NA,6,9/13/17,1,5,0,head tilt; 155 FD 8/22/17,6,0,1,1,head tilt; 155 FD 8/22/17,
21892,CC013,"158,159x160",0,1,0,5/16/17,5/16/17,6/29/17,8/27/17,1,103,103,,,103,NA,9,NA,0,0,9,3 missing; runts,0,9,1,0,3 missing; runts,
21892,CC013,"158,159x160",0,1,0,5/16/17,5/16/17,6/29/17,11/21/17,2,189,189,,,NA,NA,5,12/13/17,2,2,1,,4,1,1,1,,
21892,CC013,"158,159x160",0,1,0,5/16/17,5/16/17,6/29/17,1/4/18,3,233,233,,,NA,NA,4,2/1/18,4,0,0,158 FD 8/22/17,4,0,1,1,158 FD 8/22/17,
21892,CC013,"161,162x163",0,1,0,5/16/17,5/16/17,6/29/17,7/22/17,1,67,67,,,67,NA,8,NA,0,0,,,0,8,1,0,chewed tails,
21892,CC013,"161,162x163",0,1,0,5/16/17,5/16/17,6/29/17,7/31/17,2,76,76,,,NA,NA,9,8/24/17,4,2,,,6,3,1,1,,
21892,CC013,"161,162x163",0,1,0,5/16/17,5/16/17,6/29/17,9/24/17,3,131,131,,,NA,NA,5,10/20/17,2,3,,,5,0,1,1,,
21892,CC013,"161,162x163",0,1,0,5/16/17,5/16/17,6/29/17,10/15/17,4,152,152,,,NA,NA,1,NA,0,0,,,0,1,1,0,,
21892,CC013,"164,165x166",0,1,0,7/14/17,7/14/17,8/2/17,9/21/17,1,69,69,,,69,NA,6,10/12/17,3,3,0,,6,0,1,1,,
21892,CC013,"164,165x166",0,1,0,7/14/17,7/14/17,8/2/17,9/27/17,2,75,75,,,NA,NA,8,10/20/17,2,5,1,1 missing,7,1,1,1,1 missing,
21892,CC013,"164,165x166",0,1,0,7/14/17,7/14/17,8/2/17,12/15/17,3,154,154,,,NA,NA,2,NA,0,0,2,missing,0,2,1,0,missing,
21892,CC013,"167,168x169",0,1,0,7/11/17,7/11/17,8/2/17,NA,1,NA,NA,,,NA,NA,0,NA,0,0,,,0,0,1,0,unproductive,
21892,CC013,"170,171x172",0,1,0,7/11/17,7/11/17,8/2/17,10/2/17,1,83,83,,,83,NA,6,NA,0,0,,,0,6,1,0,mssing,
21892,CC013,"173,174x175",0,1,0,7/31/17,7/31/17,8/24/17,12/1/17,1,123,123,,,123,NA,1,NA,0,0,,,0,1,1,0,found dead,
21892,CC013,"176,177x178",0,1,0,7/31/17,7/31/17,8/24/17,10/5/17,1,66,66,,,66,NA,9,10/26/17,5,4,0,,9,0,1,1,,
21892,CC013,"176,177x178",0,1,0,7/31/17,7/31/17,8/24/17,11/20/17,2,112,112,,,NA,NA,6,12/13/17,2,4,0,,6,0,1,1,,
21892,CC013,"176,177x178",0,1,0,7/31/17,7/31/17,8/24/17,12/4/17,3,126,126,,,NA,NA,2,12/27/17,1,1,0,,2,0,1,1,,
21892,CC013,"176,177x178",0,1,0,7/31/17,7/31/17,8/24/17,12/6/17,4,128,128,,,NA,NA,7,1/4/18,2,4,1,1 missing; 176 FD 1/18/18,6,1,1,1,1 missing; 176 FD 1/18/18,
21892,CC013,179180x181,1,0,0,9/2/17,9/2/17,10/12/17,11/28/17,1,87,87,,,87,NA,14,NA,0,0,,,0,14,1,0,,
21892,CC013,182x183,1,0,0,9/21/17,9/21/17,10/12/17,12/8/17,1,78,78,,,78,NA,9,12/27/17,4,5,,,9,0,1,1,,
21892,CC013,182x183,1,0,0,9/21/17,9/21/17,10/12/17,1/3/18,2,104,104,,,NA,26,10,NA,0,0,,,0,10,1,0,found dead,
21892,CC013,"184,185x186",0,1,0,9/24/17,9/24/17,10/20/17,11/27/17,1,64,64,,,64,NA,4,12/21/17,3,1,,,4,0,1,1,,
21892,CC013,"184,185x186",0,1,0,9/24/17,9/24/17,10/20/17,12/8/17,2,75,75,,,NA,NA,8,12/27/17,5,3,,,8,0,1,1,,
21892,CC013,"184,185x186",0,1,0,9/24/17,9/24/17,10/20/17,12/14/17,3,81,81,,,NA,NA,4,1/4/18,2,2,,,4,0,1,1,,
21892,CC013,"184,185x186",0,1,0,9/24/17,9/24/17,10/20/17,1/5/18,4,103,103,,,NA,NA,9,2/1/18,5,4,,,9,0,1,1,,
21892,CC013,"184,185x186",0,1,0,9/24/17,9/24/17,10/20/17,2/1/18,5,130,130,,,NA,NA,7,3/27/18,5,2,,,7,0,1,1,,
21892,CC013,"184,185x186",0,1,0,9/24/17,9/24/17,10/20/17,3/8/18,6,165,165,,,NA,NA,3,4/4/18,1,2,,,3,0,1,1,,
21892,CC013,"184,185x186",0,1,0,9/24/17,9/24/17,10/20/17,4/1/18,7,189,189,,,NA,NA,1,NA,0,0,,,0,1,1,0,missing,
21892,CC013,"184,185x186",0,1,0,9/24/17,9/24/17,10/20/17,4/22/18,8,210,210,,,NA,NA,3,NA,0,0,,,0,3,1,0,1 FD; drowned,
21892,CC013,"187,188x189",0,1,0,9/27/17,9/27/17,10/20/17,12/23/17,1,87,87,,,87,NA,10,1/18/18,6,3,1,all short tails; 1 FD,9,1,1,1,all short tails; 1 FD,
21892,CC013,"187,188x189",0,1,0,9/27/17,9/27/17,10/20/17,2/22/18,2,148,148,,,NA,NA,9,3/21/18,5,4,0,187 FD 1/16/18,9,0,1,1,187 FD 1/16/18,
21892,CC013,"190,191x192",0,1,0,10/5/17,10/5/17,10/26/17,12/27/17,1,83,83,,,83,NA,7,1/18/18,4,3,0,190 FD 1/31/18,7,0,1,1,190 FD 1/31/18,
21892,CC013,"193,194x195",0,1,0,10/5/17,10/5/17,10/26/17,12/6/17,1,62,62,,,62,NA,6,NA,0,0,6,3 FD; 3 missing,0,6,1,0,3 FD; 3 missing,
21892,CC013,"193,194x195",0,1,0,10/5/17,10/5/17,10/26/17,12/25/17,2,81,81,,,NA,NA,2,NA,0,0,2,missing,0,2,1,0,missing,
21892,CC013,"193,194x195",0,1,0,10/5/17,10/5/17,10/26/17,1/12/18,3,99,99,,,NA,NA,4,2/6/18,1,3,0,,4,0,1,1,,
21892,CC013,196x197,1,0,0,10/5/17,10/5/17,10/26/17,12/15/17,1,71,71,,,71,NA,9,1/4/18,5,4,,,9,0,1,1,,
21892,CC013,196x197,1,0,0,10/5/17,10/5/17,10/26/17,2/13/18,2,131,131,,,NA,60,5,3/6/18,2,3,,,5,0,1,1,,
21892,CC013,"198,199x200",0,1,0,11/21/17,11/21/17,1/4/18,NA,1,NA,NA,,,NA,NA,0,NA,0,0,,,0,0,1,0,,
21892,CC013,"201,202x203",0,1,0,11/28/17,11/21/17,1/4/18,2/8/18,1,72,79,,,72,NA,9,3/6/18,7,2,,,9,0,1,1,,
21892,CC013,"201,202x203",0,1,0,11/28/17,11/21/17,1/4/18,2/11/18,2,75,82,,,NA,NA,7,3/6/18,4,3,,,7,0,1,1,,
21892,CC013,"204,205x206",0,1,0,11/20/17,11/20/17,1/4/18,2/6/18,1,78,78,,,78,NA,9,3/6/18,5,4,,,9,0,1,1,,
21892,CC013,"207,208x209",0,1,0,11/28/17,11/20/17,1/4/18,2/1/18,1,65,73,,,65,NA,11,2/24/18,1,9,1,1 missing,10,1,1,1,1 missing,
21892,CC013,"207,208x209",0,1,0,11/28/17,11/20/17,1/4/18,4/1/18,2,124,132,,,NA,NA,10,5/2/18,5,5,0,,10,0,1,1,,
21892,CC013,"207,208x209",0,1,0,11/28/17,11/20/17,1/4/18,6/30/18,3,214,222,,,NA,NA,3,7/25/18,1,2,0,,3,0,1,1,,
21892,CC013,"207,208x209",0,1,0,11/28/17,11/20/17,1/4/18,7/1/18,4,215,223,,,NA,NA,1,8/1/18,0,1,0,207 DU 2/27/18,1,0,1,1,207 DU 2/27/18,
21892,CC013,"210,211x212",0,1,0,11/27/17,11/27/17,1/4/18,2/2/18,1,67,67,,,67,NA,9,2/20/18,3,6,0,,9,0,1,1,,
21892,CC013,"210,211x212",0,1,0,11/27/17,11/27/17,1/4/18,2/13/18,2,78,78,,,NA,NA,5,3/13/18,0,2,3,2 missing,2,3,1,1,2 missing,
21892,CC013,"210,211x212",0,1,0,11/27/17,11/27/17,1/4/18,2/22/18,3,87,87,,,NA,NA,3,3/21/18,2,1,0,,3,0,1,1,,
21892,CC013,"210,211x212",0,1,0,11/27/17,11/27/17,1/4/18,3/17/18,4,110,110,,,NA,NA,5,4/12/18,2,3,0,,5,0,1,1,,
21892,CC013,"210,211x212",0,1,0,11/27/17,11/27/17,1/4/18,3/26/18,5,119,119,,,NA,NA,6,4/16/18,5,1,0,,6,0,1,1,,
21892,CC013,213x214,1,0,0,11/27/17,11/20/17,1/4/18,2/10/18,1,75,82,,,75,NA,9,3/13/18,4,5,0,,9,0,1,1,,
21892,CC013,213x214,1,0,0,11/27/17,11/20/17,1/4/18,3/4/18,2,97,104,,,NA,22,3,NA,0,0,3,1 FD; 214 replaced with 212; 214 FD 3/6/18,0,3,1,0,1 FD; 214 replaced with 212; 214 FD 3/6/18,
21892,CC013,"215,216x217",0,1,0,12/6/17,12/6/17,1/18/18,2/26/18,1,82,82,,,82,NA,6,3/21/18,4,1,,,5,1,1,1,1 missing; 215 DU 2/27/18,
21892,CC013,"218,219x220",0,1,0,12/15/17,12/15/17,3/6/18,NA,1,NA,NA,,,NA,NA,0,NA,0,0,,,0,0,1,0,218 FD 5/29/18,
21892,CC013,"221,222x223",0,1,0,12/15/17,12/15/17,3/6/18,6/4/18,1,171,171,,,171,NA,6,7/4/18,3,3,0,,6,0,1,1,,
21892,CC013,224x225,1,0,0,12/15/17,12/15/17,3/6/18,NA,1,NA,NA,,,NA,NA,0,NA,0,0,,,0,0,1,0,,
21892,CC013,226x227,1,0,0,1/5/18,1/5/18,3/6/18,NA,1,NA,NA,,,NA,NA,0,NA,0,0,,,0,0,1,0,,
21892,CC013,"228,229x230",0,1,0,1/5/18,1/5/18,3/6/18,4/4/18,1,89,89,,,89,NA,7,5/2/18,2,5,0,pups with short tails and missing limbs; 228 FD 5/15/18,7,0,1,1,pups with short tails and missing limbs; 228 FD 5/15/18,
21892,CC013,"231,232x233",0,1,0,1/5/18,1/5/18,3/6/18,NA,1,NA,NA,,,NA,NA,0,NA,0,0,,,0,0,1,0,231 FD 5/15/18,
21892,CC013,"234,235x236",0,1,0,2/10/18,2/10/18,4/4/18,5/2/18,1,81,81,,,81,NA,8,5/30/18,5,3,0,234 FD 5/15/18,8,0,1,1,234 FD 5/15/18,
21892,CC013,"237,238x239",0,1,0,2/10/18,2/10/18,4/4/18,NA,1,NA,NA,,,NA,NA,0,NA,0,0,,,0,0,1,0,wet box 4/8/18; all dead,
21892,CC013,240x241,1,0,0,3/8/18,3/8/18,5/11/18,NA,1,NA,NA,,,NA,NA,0,NA,0,0,0,240 FD 8/1/18,0,0,1,0,240 FD 8/1/18,
21892,CC013,"245,246x247",0,1,0,4/1/18,4/1/18,5/15/18,NA,1,NA,NA,,,NA,NA,0,NA,0,0,0,,0,0,1,0,,
21892,CC013,248x249,1,0,0,4/1/18,4/1/18,5/15/18,6/8/18,1,68,68,,,68,NA,7,7/4/18,4,3,0,,7,0,1,1,,
21892,CC013,252x253,1,0,0,4/22/18,4/1/18,6/5/18,7/10/18,1,79,100,,,79,NA,10,8/1/18,6,4,0,,10,0,1,1,,
21892,CC013,252x253,1,0,0,4/22/18,4/1/18,6/5/18,8/3/18,2,103,124,,,NA,24,5,NA,0,0,5,252 and pups FD 8/19/18,0,5,1,0,252 and pups FD 8/19/18,
21892,CC013,"70,71x72",0,1,0,5/6/16,5/6/16,5/23/16,7/16/16,1,71,71,,,71,NA,5,8/11/16,2,2,1,1 missing; short tails,4,1,1,1,1 missing; short tails,
21892,CC013,"70,71x72",0,1,0,5/6/16,5/6/16,5/23/16,9/12/16,2,129,129,,,NA,NA,9,10/6/16,5,4,0,,9,0,1,1,,
21892,CC013,"70,71x72",0,1,0,5/6/16,5/6/16,5/23/16,10/28/16,3,175,175,,,NA,NA,8,11/17/16,4,4,0,,8,0,1,1,,
21892,CC013,"70,71x72",0,1,0,5/6/16,5/6/16,5/23/16,12/11/16,4,219,219,,,NA,NA,7,1/5/17,5,2,0,retired breeders 12/15/16,7,0,1,1,retired breeders 12/15/16,
21892,CC013,"73,74x75",0,1,0,6/14/16,6/14/16,7/8/16,9/1/16,1,79,79,,,79,NA,8,9/21/16,4,4,,,8,0,1,1,,
21892,CC013,"73,74x75",0,1,0,6/14/16,6/14/16,7/8/16,9/15/16,2,93,93,,,NA,NA,5,10/19/16,4,1,,,5,0,1,1,,
21892,CC013,"73,74x75",0,1,0,6/14/16,6/14/16,7/8/16,10/9/16,3,117,117,,,NA,NA,4,11/4/16,1,3,,,4,0,1,1,,
21892,CC013,"76,77x78",0,1,0,6/14/16,6/14/16,7/8/16,8/27/16,1,74,74,,,74,NA,6,9/21/16,3,3,,,6,0,1,1,,
21892,CC013,"82,83x84",0,1,0,8/2/16,8/2/16,8/26/16,10/11/16,1,70,70,,,70,NA,6,11/4/16,2,4,,,6,0,1,1,,
21892,CC013,"82,83x84",0,1,0,8/2/16,8/2/16,8/26/16,10/29/16,2,88,88,,,NA,NA,5,NA,0,0,,,0,5,1,0,1 missing; 4 FD; 82 FD 11/8/16,
21892,CC013,85x86,1,0,0,8/1/16,8/1/16,9/15/16,11/12/16,1,103,103,,,103,NA,9,12/8/16,5,4,,,9,0,1,1,,
21892,CC013,85x86,1,0,0,8/1/16,8/1/16,9/15/16,1/7/17,2,159,159,,,NA,56,8,2/2/17,7,1,,,8,0,1,1,,
21892,CC013,85x86,1,0,0,8/1/16,8/1/16,9/15/16,3/15/17,3,226,226,,,NA,67,5,4/5/17,4,1,,,5,0,1,1,retired breeders 4/12/17,
21892,CC013,"87,88x89",0,1,0,9/12/16,9/12/16,10/6/16,11/20/16,1,69,69,,,69,NA,6,12/15/16,4,2,,,6,0,1,1,,
21892,CC013,"87,88x89",0,1,0,9/12/16,9/12/16,10/6/16,12/11/16,2,90,90,,,NA,NA,5,1/5/17,1,1,,,2,3,1,1,3 FD,
21892,CC013,"87,88x89",0,1,0,9/12/16,9/12/16,10/6/16,2/10/17,3,151,151,,,NA,NA,3,3/8/17,1,2,,,3,0,1,1,,
21892,CC013,"87,88x89",0,1,0,9/12/16,9/12/16,10/6/16,3/27/17,4,196,196,,,NA,NA,8,4/20/17,2,4,,,6,2,1,1,missing,
21892,CC013,"87,88x89",0,1,0,9/12/16,9/12/16,10/6/16,4/2/17,5,202,202,,,NA,NA,4,4/26/17,2,1,,,3,1,1,1,missing,
21892,CC013,"87,88x89",0,1,0,9/12/16,9/12/16,10/6/16,5/13/17,6,243,243,,,NA,NA,3,6/23/17,1,2,,,3,0,1,1,,
21892,CC013,"87,88x89",0,1,0,9/12/16,9/12/16,10/6/16,5/23/17,7,253,253,,,NA,NA,7,6/23/17,4,3,,,7,0,1,1,retired breeders 5/17/17,
21892,CC013,"89,80x81",0,1,0,8/2/16,8/2/16,8/26/16,10/15/16,1,74,74,,,74,NA,4,11/17/16,0,3,1,1 missing,3,1,1,1,1 missing,
21892,CC013,"90,91x92",0,1,0,9/12/16,9/12/16,10/6/16,1/8/17,1,118,118,,,118,NA,6,2/5/17,3,3,,,6,0,1,1,90 FD 12/26/17,
21892,CC013,"93,94x95",0,1,0,9/15/16,9/15/16,10/19/16,11/22/16,1,68,68,,,68,NA,7,12/15/16,4,3,,,7,0,1,1,,
21892,CC013,"93,94x95",0,1,0,9/15/16,9/15/16,10/19/16,1/6/17,2,113,113,,,NA,NA,7,1/25/17,3,4,,,7,0,1,1,,
21892,CC013,"93,94x95",0,1,0,9/15/16,9/15/16,10/19/16,1/30/17,3,137,137,,,NA,NA,3,2/23/17,3,0,,,3,0,1,1,95 FD 5/9/17,
21892,CC013,"96,97x98",0,1,0,9/1/16,9/1/16,10/28/16,11/27/16,1,87,87,,,87,NA,9,12/21/16,4,5,,,9,0,1,1,96 FD 1/29/17,
18859,CC015,100x101,1,0,0,6/15/17,6/15/17,7/6/17,9/12/17,1,89,89,,,89,NA,3,10/5/17,3,0,,,3,0,1,1,,
18859,CC015,100x101,1,0,0,6/15/17,6/15/17,7/6/17,10/4/17,2,111,111,,,NA,22,3,NA,0,0,,,0,3,1,0,missing ,
18859,CC015,"102,103,104x105",0,0,1,6/12/17,6/12/17,7/6/17,9/29/17,1,109,109,,,109,NA,1,NA,0,0,1,missing,0,1,1,0,missing,
18859,CC015,"106,107x108",0,1,0,6/30/17,6/30/17,8/4/17,9/19/17,1,81,81,,,81,NA,2,NA,0,0,2,runts,0,2,1,0,runts,
18859,CC015,"106,107x108",0,1,0,6/30/17,6/30/17,8/4/17,10/8/17,2,100,100,10/10/17,,NA,NA,6,11/1/17,2,2,2,,4,2,2,2,,
18859,CC015,"106,107x108",0,1,0,6/30/17,6/30/17,8/4/17,11/3/17,3,126,126,,,NA,NA,3,11/21/17,2,1,0,,3,0,1,1,,
18859,CC015,"106,107x108",0,1,0,6/30/17,6/30/17,8/4/17,11/21/17,4,144,144,,,NA,NA,1,NA,0,0,1,missing,0,1,1,0,missing,
18859,CC015,"106,107x108",0,1,0,6/30/17,6/30/17,8/4/17,12/16/17,5,169,169,,,NA,NA,3,1/17/18,0,3,0,,3,0,1,1,,
18859,CC015,"106,107x108",0,1,0,6/30/17,6/30/17,8/4/17,1/8/18,6,192,192,,,NA,NA,5,2/6/18,4,1,0,106 derm 2/26/18,5,0,1,1,106 derm 2/26/18,
18859,CC015,"109,110x111",0,1,0,7/11/17,7/11/17,8/4/17,10/2/17,1,83,83,,,83,NA,4,10/26/17,2,2,0,,4,0,1,1,,
18859,CC015,"109,110x111",0,1,0,7/11/17,7/11/17,8/4/17,11/13/17,2,125,125,,,NA,NA,2,12/13/17,1,1,0,,2,0,1,1,,
18859,CC015,"109,110x111",0,1,0,7/11/17,7/11/17,8/4/17,11/18/17,3,130,130,,,NA,NA,2,12/20/17,1,1,0,,2,0,1,1,,
18859,CC015,"109,110x111",0,1,0,7/11/17,7/11/17,8/4/17,12/16/17,4,158,158,,,NA,NA,2,1/18/18,1,1,0,,2,0,1,1,,
18859,CC015,"109,110x111",0,1,0,7/11/17,7/11/17,8/4/17,12/27/17,5,169,169,,,NA,NA,2,1/23/18,2,0,0,,2,0,1,1,,
18859,CC015,"109,110x111",0,1,0,7/11/17,7/11/17,8/4/17,1/8/18,6,181,181,,,NA,NA,1,2/6/18,1,0,0,,1,0,1,1,,
18859,CC015,"109,110x111",0,1,0,7/11/17,7/11/17,8/4/17,1/19/18,7,192,192,,,NA,NA,2,2/13/18,1,1,0,,2,0,1,1,,
18859,CC015,"109,110x111",0,1,0,7/11/17,7/11/17,8/4/17,2/11/18,8,215,215,,,NA,NA,3,3/14/18,1,2,0,,3,0,1,1,,
18859,CC015,"109,110x111",0,1,0,7/11/17,7/11/17,8/4/17,2/21/18,9,225,225,,,NA,NA,1,3/21/18,1,0,0,,1,0,1,1,,
18859,CC015,"109,110x111",0,1,0,7/11/17,7/11/17,8/4/17,10/2/17,10,83,83,,,NA,NA,4,10/26/17,2,2,0,,4,0,1,1,,
18859,CC015,"109,110x111",0,1,0,7/11/17,7/11/17,8/4/17,11/13/17,11,125,125,,,NA,NA,2,12/13/17,1,1,0,,2,0,1,1,,
18859,CC015,"109,110x111",0,1,0,7/11/17,7/11/17,8/4/17,11/18/17,12,130,130,,,NA,NA,2,12/20/17,1,1,0,,2,0,1,1,,
18859,CC015,"109,110x111",0,1,0,7/11/17,7/11/17,8/4/17,12/16/17,13,158,158,,,NA,NA,2,1/8/18,1,1,0,,2,0,1,1,,
18859,CC015,"109,110x111",0,1,0,7/11/17,7/11/17,8/4/17,12/27/17,14,169,169,,,NA,NA,2,1/23/18,2,0,0,,2,0,1,1,,
18859,CC015,"109,110x111",0,1,0,7/11/17,7/11/17,8/4/17,1/8/18,15,181,181,,,NA,NA,1,2/6/18,1,0,0,,1,0,1,1,,
18859,CC015,"109,110x111",0,1,0,7/11/17,7/11/17,8/4/17,1/19/18,16,192,192,,,NA,NA,2,2/13/18,1,1,0,,2,0,1,1,,
18859,CC015,"109,110x111",0,1,0,7/11/17,7/11/17,8/4/17,2/11/18,17,215,215,,,NA,NA,3,3/14/18,1,2,0,,3,0,1,1,,
18859,CC015,"109,110x111",0,1,0,7/11/17,7/11/17,8/4/17,2/21/18,18,225,225,,,NA,NA,1,3/21/18,1,0,0,,1,0,1,1,,
18859,CC015,112x113,1,0,0,7/31/17,7/31/17,8/24/17,NA,1,NA,NA,,,NA,NA,0,NA,0,0,0,112 FD 10/8/17,0,0,1,0,112 FD 10/8/17,
18859,CC015,"114,115x116",0,1,0,8/3/17,8/3/17,8/24/17,12/7/17,1,126,126,,,126,NA,3,1/3/18,1,0,2,1 BD; 1 FD,1,2,1,1,1 BD; 1 FD,
18859,CC015,"114,115x116",0,1,0,8/3/17,8/3/17,8/24/17,12/7/17,2,126,126,,,NA,NA,3,1/3/18,1,0,2,1 BD; 1 FD,1,2,1,1,1 BD; 1 FD,
18859,CC015,"117,118x116",0,1,0,8/3/17,8/3/17,8/24/17,12/12/17,1,131,131,,,131,NA,3,NA,0,0,,,0,3,1,0,found dead,
18859,CC015,"117,118x116",0,1,0,8/3/17,8/3/17,8/24/17,1/2/18,2,152,152,,,NA,NA,3,2/1/18,0,1,,,1,2,1,1,,
18859,CC015,"117,118x116",0,1,0,8/3/17,8/3/17,8/24/17,1/20/18,3,170,170,,,NA,NA,2,2/13/18,2,0,,,2,0,1,1,,
18859,CC015,"117,118x116",0,1,0,8/3/17,8/3/17,8/24/17,3/7/18,4,216,216,,,NA,NA,1,3/28/18,0,0,,,0,1,1,0,missing,
18859,CC015,"117,118x116",0,1,0,8/3/17,8/3/17,8/24/17,3/10/18,5,219,219,,,NA,NA,5,4/11/18,2,3,,,5,0,1,1,,
18859,CC015,"119,120x121",0,1,0,7/18/17,7/18/17,8/24/17,9/29/17,1,73,73,,,73,NA,5,10/20/17,2,3,,,5,0,1,1,,
18859,CC015,"119,120x121",0,1,0,7/18/17,7/18/17,8/24/17,10/21/17,2,95,95,,,NA,NA,5,11/5/17,0,0,,,0,5,1,0,found dead,
18859,CC015,"119,120x121",0,1,0,7/18/17,7/18/17,8/24/17,11/26/17,3,131,131,,,NA,NA,3,NA,0,0,,,0,3,1,0,"2 missing, 1 FD",
18859,CC015,122x123,1,0,0,7/18/17,7/18/17,8/24/17,NA,1,NA,NA,,,NA,NA,0,NA,0,0,,,0,0,1,0,female found dead 12/27/17,
18859,CC015,"124,125x126",0,1,0,7/11/17,7/11/17,8/24/17,10/30/17,1,111,111,,,111,NA,2,11/28/17,1,1,0,,2,0,1,1,,
18859,CC015,"124,125x126",0,1,0,7/11/17,7/11/17,8/24/17,11/19/17,2,131,131,,,NA,NA,2,12/20/17,1,1,0,,2,0,1,1,,
18859,CC015,"124,125x126",0,1,0,7/11/17,7/11/17,8/24/17,12/11/17,3,153,153,,,NA,NA,6,NA,0,0,6,2 FD,0,6,1,0,2 FD,
18859,CC015,"124,125x126",0,1,0,7/11/17,7/11/17,8/24/17,12/11/17,4,153,153,,,NA,NA,2,1/3/18,2,0,0,,2,0,1,1,,
18859,CC015,"124,125x126",0,1,0,7/11/17,7/11/17,8/24/17,12/14/17,5,156,156,,,NA,NA,1,1/18/18,1,0,0,,1,0,1,1,,
18859,CC015,"124,125x126",0,1,0,7/11/17,7/11/17,8/24/17,1/2/18,6,175,175,,,NA,NA,1,NA,0,0,1,,0,1,1,0,,
18859,CC015,"124,125x126",0,1,0,7/11/17,7/11/17,8/24/17,10/30/17,7,111,111,,,NA,NA,2,11/21/17,1,1,0,,2,0,1,1,,
18859,CC015,"124,125x126",0,1,0,7/11/17,7/11/17,8/24/17,11/19/17,8,131,131,,,NA,NA,2,12/10/17,1,1,0,,2,0,1,1,,
18859,CC015,"124,125x126",0,1,0,7/11/17,7/11/17,8/24/17,12/11/17,9,153,153,,,NA,NA,6,NA,0,0,6,2 FD,0,6,1,0,2 FD,
18859,CC015,"124,125x126",0,1,0,7/11/17,7/11/17,8/24/17,12/11/17,10,153,153,,,NA,NA,2,1/3/18,2,0,0,,2,0,1,1,,
18859,CC015,"124,125x126",0,1,0,7/11/17,7/11/17,8/24/17,12/14/17,11,156,156,,,NA,NA,1,1/18/18,1,0,0,,1,0,1,1,,
18859,CC015,"124,125x126",0,1,0,7/11/17,7/11/17,8/24/17,1/2/18,12,175,175,,,NA,NA,1,NA,0,0,1,,0,1,1,0,,
18859,CC015,"127,128x129",0,1,0,9/12/17,9/9/18,10/5/17,11/19/17,1,68,-294,,,68,NA,1,NA,0,0,1,,0,1,1,0,,
18859,CC015,"127,128x129",0,1,0,9/12/17,9/9/18,10/5/17,1/21/18,2,131,-231,,,NA,NA,3,1/29/18,0,0,3,1 BD; missing; 127 prolapse 2/28/18,0,3,1,0,1 BD; missing; 127 prolapse 2/28/18,
18859,CC015,"127,128x129",0,1,0,9/12/17,9/9/17,10/5/17,11/19/17,3,68,71,,,NA,NA,1,NA,0,0,1,,0,1,1,0,,
18859,CC015,"127,128x129",0,1,0,9/12/17,9/9/17,10/5/17,1/21/18,4,131,134,,,NA,NA,3,NA,0,0,3,2 missing; 1 BD; 127 prolaps 2/28/8,0,3,1,0,2 missing; 1 BD; 127 prolaps 2/28/8,
18859,CC015,"130,131x132",0,1,0,9/15/17,9/15/17,10/5/17,12/26/17,1,102,102,,,102,NA,1,NA,0,0,1,missing,0,1,1,0,missing,
18859,CC015,"130,131x132",0,1,0,9/15/17,9/15/17,10/5/17,1/15/18,2,122,122,,,NA,NA,3,NA,0,0,3,missing,0,3,1,0,missing,
18859,CC015,"130,131x132",0,1,0,9/15/17,9/15/17,10/5/17,2/6/18,3,144,144,,,NA,NA,2,NA,0,0,2,2 BD,0,2,1,0,2 BD,
18859,CC015,"130,131x132",0,1,0,9/15/17,9/15/17,10/5/17,2/26/18,4,164,164,,,NA,NA,5,NA,0,0,5,3 BD,0,5,1,0,3 BD,
18859,CC015,"130,131x132",0,1,0,9/15/17,9/15/17,10/5/17,12/26/17,5,102,102,,,NA,NA,1,NA,0,0,1,,0,1,1,0,,
18859,CC015,"130,131x132",0,1,0,9/15/17,9/15/17,10/5/17,1/15/18,6,122,122,,,NA,NA,3,NA,0,0,3,,0,3,1,0,,
18859,CC015,"130,131x132",0,1,0,9/15/17,9/15/17,10/5/17,2/6/18,7,144,144,,,NA,NA,2,NA,0,0,2,,0,2,1,0,,
18859,CC015,"130,131x132",0,1,0,9/15/17,9/15/17,10/5/17,2/26/18,8,164,164,,,NA,NA,5,NA,0,0,5,3 BD,0,5,1,0,3 BD,
18859,CC015,133x134,1,0,0,9/10/17,9/10/17,10/5/17,12/11/17,1,92,92,,,92,NA,9,1/3/18,2,4,3,1 FD; 2 missing,6,3,1,1,1 FD; 2 missing,
18859,CC015,133x134,1,0,0,9/10/17,9/10/17,10/5/17,NA,2,NA,NA,,,NA,NA,9,1/3/18,2,4,3,1 FD; 2 missing,6,3,1,1,1 FD; 2 missing,
18859,CC015,135x136,1,0,0,9/25/17,9/25/17,10/20/17,1/20/18,1,117,117,,,117,NA,2,NA,0,0,2,,0,2,1,0,,
18859,CC015,137x138,1,0,0,9/23/17,9/23/17,10/20/17,NA,1,NA,NA,,,NA,NA,0,NA,0,0,,,0,0,1,0,unproductive,
18859,CC015,"139,140x141",0,1,0,9/29/17,9/29/17,10/20/17,NA,1,NA,NA,,,NA,NA,0,NA,0,0,,,0,0,1,0,unproductive,
18859,CC015,"142,143x144",0,1,0,10/2/17,10/2/17,10/26/17,12/10/17,1,69,69,,,69,NA,4,12/13/17,0,0,,,0,4,1,0,3 FD,
18859,CC015,"142,143x144",0,1,0,10/2/17,10/2/17,10/26/17,2/3/18,2,124,124,,,NA,NA,2,2/13/18,0,0,,,0,2,1,0,missing,
18859,CC015,"142,143x144",0,1,0,10/2/17,10/2/17,10/26/17,2/24/18,3,145,145,,,NA,NA,4,3/21/18,3,0,,,3,1,1,1,,
18859,CC015,"142,143x144",0,1,0,10/2/17,10/2/17,10/26/17,3/17/18,4,166,166,,,NA,NA,1,4/11/18,1,0,,,1,0,1,1,,
18859,CC015,"142,143x144",0,1,0,10/2/17,10/2/17,10/26/17,4/7/18,5,187,187,,,NA,NA,1,5/8/18,0,1,,,1,0,1,1,,
18859,CC015,"142,143x144",0,1,0,10/2/17,10/2/17,10/26/17,6/18/18,6,259,259,,,NA,NA,1,7/2/18,0,0,,,0,1,1,0,1 BD,
18859,CC015,145x146,1,0,0,10/8/17,10/8/17,11/1/17,NA,1,NA,NA,,,NA,NA,0,NA,0,0,0,,0,0,1,0,,
18859,CC015,147x148,1,0,0,10/8/17,10/8/17,11/11/17,12/16/17,1,69,69,,,69,NA,4,1/18/18,3,0,1,,3,1,1,1,,
18859,CC015,"149,150x151",0,1,0,11/3/17,11/3/17,12/13/17,3/3/18,1,120,120,3/7/18,,120,NA,8,4/3/18,2,6,0,,8,0,2,2,,
18859,CC015,"149,150x151",0,1,0,11/3/17,11/3/17,12/13/17,5/12/18,2,190,190,,,NA,NA,1,6/14/18,0,1,0,,1,0,1,1,,
18859,CC015,152x153,1,0,0,11/3/17,11/3/17,12/13/17,1/15/18,1,73,73,,,73,NA,1,1/20/18,0,0,,,0,1,1,0,missing,
18859,CC015,152x153,1,0,0,11/3/17,11/3/17,12/13/17,2/4/18,2,93,93,,,NA,20,2,2/28/18,0,1,,,1,1,1,1,missing,
18859,CC015,152x153,1,0,0,11/3/17,11/3/17,12/13/17,2/26/18,3,115,115,,,NA,22,3,3/28/18,1,1,,,2,1,1,1,,
18859,CC015,152x153,1,0,0,11/3/17,11/3/17,12/13/17,3/19/18,4,136,136,,,NA,21,2,NA,0,0,,,0,2,1,0,missing,
18859,CC015,152x153,1,0,0,11/3/17,11/3/17,12/13/17,5/3/18,5,181,181,,,NA,45,1,5/31/18,0,1,,,1,0,1,1,152 FD 5/27/18,
18859,CC015,154x155,1,0,0,10/21/17,10/21/17,12/13/17,1/5/18,1,76,76,,,76,NA,3,2/1/18,1,2,,,3,0,1,1,,
18859,CC015,154x155,1,0,0,10/21/17,10/21/17,12/13/17,1/26/18,2,97,97,,,NA,21,6,2/20/18,3,2,,,5,1,1,1,1 missing,
18859,CC015,154x155,1,0,0,10/21/17,10/21/17,12/13/17,2/21/18,3,123,123,,,NA,26,5,3/21/18,2,3,,,5,0,1,1,,
18859,CC015,154x155,1,0,0,10/21/17,10/21/17,12/13/17,2/26/18,4,128,128,,,NA,NA,2,NA,0,0,,,0,2,1,0,155 replaced with 157 on 2/20; 155 had derm,
18859,CC015,156x157,1,0,0,10/30/17,10/21/17,12/13/17,1/3/18,1,65,74,,,65,NA,3,2/1/18,1,2,0,,3,0,1,1,,
18859,CC015,156x157,1,0,0,10/30/17,10/21/17,12/13/17,1/24/18,2,86,95,,,NA,21,3,2/20/18,1,2,0,,3,0,1,1,,
18859,CC015,156x157,1,0,0,10/30/17,10/21/17,12/13/17,2/17/18,3,110,119,,,NA,24,3,3/21/18,3,0,0,,3,0,1,1,,
18859,CC015,156x157,1,0,0,10/30/17,10/21/17,12/13/17,3/31/18,4,152,161,,,NA,42,3,4/25/18,1,2,0,,3,0,1,1,,
18859,CC015,156x157,1,0,0,10/30/17,10/21/17,12/13/17,5/19/18,5,201,210,,,NA,49,2,6/19/18,2,0,0,,2,0,1,1,,
18859,CC015,156x157,1,0,0,10/30/17,10/21/17,12/13/17,7/11/18,6,254,263,,,NA,53,3,8/8/18,2,1,0,,3,0,1,1,,
18859,CC015,158x159,1,0,0,11/13/17,11/13/17,1/3/18,2/6/18,1,85,85,,,85,NA,4,3/6/18,2,2,,,4,0,1,1,,
18859,CC015,158x159,1,0,0,11/13/17,11/13/17,1/3/18,3/23/18,2,130,130,,,NA,45,3,4/11/18,2,1,,,3,0,1,1,,
18859,CC015,158x159,1,0,0,11/13/17,11/13/17,1/3/18,4/15/18,3,153,153,,,NA,23,5,5/15/18,1,0,,,1,4,1,1,2 FD; 2 missing; 158 died giving birth 5/14/18,
18859,CC015,160x161,1,0,0,11/19/17,11/19/17,1/3/18,3/6/18,1,107,107,,,107,NA,5,4/3/18,5,0,0,,5,0,1,1,,
18859,CC015,160x161,1,0,0,11/19/17,11/19/17,1/3/18,4/19/18,2,151,151,,,NA,44,3,5/31/18,1,2,0,,3,0,1,1,,
18859,CC015,160x161,1,0,0,11/19/17,11/19/17,1/3/18,5/13/18,3,175,175,,,NA,24,2,6/14/18,1,1,0,,2,0,1,1,,
18859,CC015,162x163,1,0,0,11/18/17,11/18/17,1/3/18,2/14/18,1,88,88,,,88,NA,5,3/14/18,2,3,0,,5,0,1,1,,
18859,CC015,162x163,1,0,0,11/18/17,11/18/17,1/3/18,3/29/18,2,131,131,,,NA,43,3,4/16/18,1,2,0,,3,0,1,1,,
18859,CC015,162x163,1,0,0,11/18/17,11/18/17,1/3/18,5/12/18,3,175,175,,,NA,44,1,NA,0,0,1,missing,0,1,1,0,missing,
18859,CC015,"164,165x166",0,1,0,12/11/17,12/11/17,1/23/18,2/25/18,1,76,76,,,76,NA,5,NA,0,0,,,0,5,1,0,2 BD; 4 missing 2/28/18,
18859,CC015,"164,165x166",0,1,0,12/11/17,12/11/17,1/23/18,3/21/18,2,100,100,,,NA,NA,2,NA,0,0,,,0,2,1,0,4 BD; 164 FD 6/10/18,
18859,CC015,171x172,1,0,0,12/11/17,12/11/17,1/23/18,2/15/18,1,66,66,,,66,NA,1,3/12/18,0,0,1,,0,1,1,0,,
18859,CC015,171x172,1,0,0,12/11/17,12/11/17,1/23/18,3/8/18,2,87,87,,,NA,21,1,4/3/18,1,0,0,,1,0,1,1,,
18859,CC015,171x172,1,0,0,12/11/17,12/11/17,1/23/18,3/30/18,3,109,109,,,NA,22,4,4/25/18,1,2,1,1 missing,3,1,1,1,1 missing,
18859,CC015,171x172,1,0,0,12/11/17,12/11/17,1/23/18,5/14/18,4,154,154,,,NA,45,2,6/14/18,2,0,0,,2,0,1,1,,
18859,CC015,175x176,1,0,0,12/14/17,12/10/17,2/1/18,3/12/18,1,88,92,,,88,NA,1,NA,0,0,1,,0,1,1,0,,
18859,CC015,175x176,1,0,0,12/14/17,12/10/17,2/1/18,5/3/18,2,140,144,,,NA,52,4,5/31/18,1,3,0,,4,0,1,1,,
18859,CC015,175x176,1,0,0,12/14/17,12/10/17,2/1/18,7/14/18,3,212,216,,,NA,72,2,8/16/18,1,1,0,,2,0,1,1,,
18859,CC015,175x176,1,0,0,12/14/17,12/10/17,2/1/18,8/6/18,4,235,239,,,NA,23,2,NA,0,0,2,1 BD; 1 missing,0,2,1,0,1 BD; 1 missing,
18859,CC015,"177,178x180",0,1,0,2/16/17,2/16/17,2/1/18,2/28/18,1,377,377,,,377,NA,2,NA,0,0,2,missing,0,2,1,0,missing,
18859,CC015,"177,178x180",0,1,0,2/16/17,2/16/17,2/1/18,4/14/18,2,422,422,,,NA,NA,1,NA,0,0,1,missing,0,1,1,0,missing,
18859,CC015,"177,178x180",0,1,0,2/16/17,2/16/17,2/1/18,7/11/18,3,510,510,,,NA,NA,3,NA,0,0,3,,0,3,1,0,,
18859,CC015,179x180,1,0,0,12/16/17,12/16/17,2/1/18,3/21/18,1,95,95,,,95,NA,2,NA,0,0,2,missing,0,2,1,0,missing,
18859,CC015,179x180,1,0,0,12/16/17,12/16/17,2/1/18,4/9/18,2,114,114,,,NA,19,3,5/8/18,1,2,0,,3,0,1,1,,
18859,CC015,179x180,1,0,0,12/16/17,12/16/17,2/1/18,5/4/18,3,139,139,,,NA,25,3,5/31/18,0,3,0,,3,0,1,1,,
18859,CC015,17x18,1,0,0,5/6/16,5/6/16,5/24/16,7/18/16,1,73,73,,,73,NA,1,NA,0,0,1,LNR,0,1,1,0,LNR,
18859,CC015,17x18,1,0,0,5/6/16,5/6/16,5/24/16,8/30/16,2,116,116,,,NA,43,3,9/22/16,2,0,1,missing,2,1,1,1,missing,
18859,CC015,17x18,1,0,0,5/6/16,5/6/16,5/24/16,9/24/16,3,141,141,,,NA,25,3,10/20/16,1,1,1,1 missing,2,1,1,1,1 missing,
18859,CC015,17x18,1,0,0,5/6/16,5/6/16,5/24/16,10/14/16,4,161,161,,,NA,20,3,11/10/16,1,2,0,,3,0,1,1,,
18859,CC015,181x182,1,0,0,12/16/17,12/16/17,2/1/18,4/14/18,1,119,119,,,119,NA,1,NA,0,0,,,0,1,1,0,,
18859,CC015,185x186,1,0,0,1/5/18,1/5/18,2/13/18,3/14/18,1,68,68,,,68,NA,2,NA,0,0,,,0,2,1,0,,
18859,CC015,185x186,1,0,0,1/5/18,1/5/18,2/13/18,4/13/18,2,98,98,,,NA,30,2,5/8/18,1,1,,,2,0,1,1,185 removed 5/31/18,
18859,CC015,189x190,1,0,0,12/27/17,10/21/17,2/13/18,NA,1,NA,NA,,,NA,NA,0,NA,0,0,,,0,0,1,0,female found dead 4/9,
18859,CC015,"191,192x193",0,1,0,1/8/18,1/8/18,2/13/18,3/18/18,1,69,69,,,69,NA,8,4/11/18,5,3,0,,8,0,1,1,,
18859,CC015,"191,192x193",0,1,0,1/8/18,1/8/18,2/13/18,4/9/18,2,91,91,,,NA,NA,2,NA,0,0,2,missing,0,2,1,0,missing,
18859,CC015,"191,192x193",0,1,0,1/8/18,1/8/18,2/13/18,4/30/18,3,112,112,,,NA,NA,6,5/31/18,2,4,0,,6,0,1,1,,
18859,CC015,"191,192x193",0,1,0,1/8/18,1/8/18,2/13/18,6/4/18,4,147,147,,,NA,NA,3,NA,0,0,3,missing,0,3,1,0,missing,
18859,CC015,"191,192x193",0,1,0,1/8/18,1/8/18,2/13/18,6/8/18,5,151,151,,,NA,NA,3,7/11/18,2,1,0,,3,0,1,1,,
18859,CC015,194x195,1,0,0,1/8/18,1/2/18,2/13/18,3/23/18,1,74,80,,,74,NA,3,4/11/18,2,1,0,,3,0,1,1,,
18859,CC015,194x195,1,0,0,1/8/18,1/2/18,2/13/18,4/14/18,2,96,102,,,NA,22,4,5/15/18,1,3,0,,4,0,1,1,,
18859,CC015,194x195,1,0,0,1/8/18,1/2/18,2/13/18,5/25/18,3,137,143,,,NA,41,4,6/19/18,0,2,2,1 missing; 1 hydro,2,2,1,1,1 missing; 1 hydro,
18859,CC015,194x195,1,0,0,1/8/18,1/2/18,2/13/18,6/21/18,4,164,170,,,NA,27,4,7/18/18,2,2,0,,4,0,1,1,,
18859,CC015,194x195,1,0,0,1/8/18,1/2/18,2/13/18,7/18/18,5,191,197,,,NA,27,1,NA,0,0,1,1 BD; 194 FD 7/23/18,0,1,1,0,1 BD; 194 FD 7/23/18,
18859,CC015,196x197,1,0,0,1/8/18,1/5/18,2/13/18,NA,1,NA,NA,,,NA,NA,0,NA,0,0,0,196 sickly looking; 197 disc 3/28/18,0,0,1,0,196 sickly looking; 197 disc 3/28/18,
18859,CC015,198x199,1,0,0,1/8/18,1/3/18,2/13/18,5/13/18,1,125,130,,,125,NA,1,NA,0,0,1,1 missing,0,1,1,0,1 missing,
18859,CC015,19x20,1,0,0,5/4/16,5/4/16,6/14/16,8/6/16,1,94,94,,,94,NA,3,9/1/16,2,0,1,1 FD,2,1,1,1,1 FD,
18859,CC015,19x20,1,0,0,5/4/16,5/4/16,6/14/16,9/19/16,2,138,138,,,NA,44,8,10/14/16,4,2,2,2 missing,6,2,1,1,2 missing,
18859,CC015,19x20,1,0,0,5/4/16,5/4/16,6/14/16,12/18/16,3,228,228,,,NA,90,1,NA,0,0,1,19 sick 1/11/17,0,1,1,0,19 sick 1/11/17,
18859,CC015,"21,22x23",0,1,0,6/3/16,6/3/16,6/29/16,9/8/16,1,97,97,,,97,NA,3,9/28/16,1,2,0,,3,0,1,1,,
18859,CC015,"21,22x23",0,1,0,6/3/16,6/3/16,6/29/16,9/30/16,2,119,119,,,NA,NA,2,NA,0,0,2,runts,0,2,1,0,runts,
18859,CC015,"21,22x23",0,1,0,6/3/16,6/3/16,6/29/16,10/22/16,3,141,141,,,NA,NA,1,11/17/16,1,0,0,,1,0,1,1,,
18859,CC015,"21,22x23",0,1,0,6/3/16,6/3/16,6/29/16,11/12/16,4,162,162,,,NA,NA,4,12/9/16,1,3,0,21 missing 12/9/16,4,0,1,1,21 missing 12/9/16,
18859,CC015,210x211,1,0,0,1/24/18,1/24/18,3/14/18,4/26/18,1,92,92,,,92,NA,4,5/22/18,2,1,,,3,1,1,1,1 missing,
18859,CC015,210x211,1,0,0,1/24/18,1/24/18,3/14/18,5/17/18,2,113,113,,,NA,21,5,6/14/18,3,2,,,5,0,1,1,,
18859,CC015,218x219,1,0,0,2/11/18,2/11/18,4/3/18,4/25/18,1,73,73,,,73,NA,2,5/22/18,1,1,0,,2,0,1,1,,
18859,CC015,218x219,1,0,0,2/11/18,2/11/18,4/3/18,5/16/18,2,94,94,,,NA,21,3,6/14/18,2,0,1,1 missing,2,1,1,1,1 missing,
18859,CC015,218x219,1,0,0,2/11/18,2/11/18,4/3/18,6/13/18,3,122,122,,,NA,28,5,7/11/18,2,2,1,1 female runt,4,1,1,1,1 female runt,
18859,CC015,220x221,1,0,0,2/3/18,2/3/18,4/26/18,NA,1,NA,NA,,,NA,NA,0,NA,0,0,0,,0,0,1,0,,
18859,CC015,222x223,1,0,0,2/6/18,2/6/18,4/26/18,NA,1,NA,NA,,,NA,NA,0,NA,0,0,0,,0,0,1,0,,
18859,CC015,229x230,1,0,0,3/31/18,3/31/18,5/22/18,6/11/18,1,72,72,,,72,NA,1,7/11/18,1,0,0,,1,0,1,1,,
18859,CC015,229x230,1,0,0,3/31/18,3/31/18,5/22/18,7/19/18,2,110,110,,,NA,38,5,8/16/18,2,3,0,229 FD 8/13/18,5,0,1,1,229 FD 8/13/18,
18859,CC015,236x237,1,0,0,4/5/18,4/5/18,5/22/18,NA,1,NA,NA,,,NA,NA,0,NA,0,0,0,,0,0,1,0,,
18859,CC015,238x239,1,0,0,3/30/18,3/30/18,5/22/18,NA,1,NA,NA,,,NA,NA,0,NA,0,0,0,,0,0,1,0,,
18859,CC015,"26,27x28",0,1,0,7/12/16,7/12/16,8/3/16,11/22/16,1,133,133,,,133,NA,4,12/15/16,1,3,0,26 sick 12/15/16,4,0,1,1,26 sick 12/15/16,
18859,CC015,31x32,1,0,0,9/8/16,9/8/16,9/28/16,11/14/16,1,67,67,,,67,NA,3,12/9/16,1,2,0,,3,0,1,1,,
18859,CC015,31x32,1,0,0,9/8/16,9/8/16,9/28/16,12/6/16,2,89,89,,,NA,22,4,12/29/16,2,2,0,,4,0,1,1,,
18859,CC015,31x32,1,0,0,9/8/16,9/8/16,9/28/16,12/28/16,3,111,111,,,NA,22,4,1/18/17,3,1,0,,4,0,1,1,,
18859,CC015,31x32,1,0,0,9/8/16,9/8/16,9/28/16,1/22/17,4,136,136,,,NA,25,4,2/16/17,3,1,0,,4,0,1,1,,
18859,CC015,"33,34x35",0,1,0,9/19/16,9/19/16,10/20/16,11/29/16,1,71,71,,,71,NA,1,NA,0,0,1,runt,0,1,1,0,runt,
18859,CC015,"33,34x35",0,1,0,9/19/16,9/19/16,10/20/16,12/20/16,2,92,92,,,NA,NA,1,NA,0,0,1,missing,0,1,1,0,missing,
18859,CC015,"33,34x35",0,1,0,9/19/16,9/19/16,10/20/16,1/10/17,3,113,113,,,NA,NA,2,2/2/17,2,0,0,33 malo 1/11/17,2,0,1,1,33 malo 1/11/17,
18859,CC015,"36,37x38",0,1,0,9/15/16,9/15/16,10/20/16,12/4/16,1,80,80,,,80,NA,2,NA,0,0,2,missing; 36 FD 3/27/17,0,2,1,0,missing; 36 FD 3/27/17,
18859,CC015,39x40,1,0,0,9/24/16,9/24/16,10/20/16,11/26/16,1,63,63,,,63,NA,2,12/21/16,1,0,1,1 FD,1,1,1,1,1 FD,
18859,CC015,39x40,1,0,0,9/24/16,9/24/16,10/20/16,12/18/16,2,85,85,,,NA,22,3,1/11/17,1,2,0,,3,0,1,1,,
18859,CC015,39x40,1,0,0,9/24/16,9/24/16,10/20/16,1/24/17,3,122,122,,,NA,37,3,2/16/17,2,1,0,,3,0,1,1,,
18859,CC015,39x40,1,0,0,9/24/16,9/24/16,10/20/16,3/9/17,4,166,166,,,NA,44,1,3/30/17,1,0,0,,1,0,1,1,,
18859,CC015,39x40,1,0,0,9/24/16,9/24/16,10/20/16,4/1/17,5,189,189,,,NA,23,2,NA,0,0,2,39 FD 4/26/17,0,2,1,0,39 FD 4/26/17,
18859,CC015,41x42,1,0,0,10/14/16,10/14/16,11/10/16,2/1/17,1,110,110,,,110,NA,2,2/23/17,0,2,0,,2,0,1,1,,
18859,CC015,41x42,1,0,0,10/14/16,10/14/16,11/10/16,2/21/17,2,130,130,,,NA,20,3,3/15/17,2,1,0,,3,0,1,1,,
18859,CC015,41x42,1,0,0,10/14/16,10/14/16,11/10/16,3/16/17,3,153,153,,,NA,23,4,NA,0,0,4,,0,4,1,0,,
18859,CC015,43x44,1,0,0,11/14/16,11/14/16,12/9/16,NA,1,NA,NA,,,NA,NA,0,NA,0,0,,,0,0,1,0,nonproductive,
18859,CC015,"45,46x47",0,1,0,11/18/17,11/18/17,12/9/16,1/29/17,1,-293,-293,,,-293,NA,2,NA,0,0,0,0,0,2,1,0,,
18859,CC015,"45,46x47",0,1,0,11/18/17,11/18/17,12/9/16,3/1/17,2,-262,-262,,,NA,NA,1,3/23/17,0,1,0,0,1,0,1,1,,
18859,CC015,"45,46x47",0,1,0,11/18/17,11/18/17,12/9/16,3/18/17,3,-245,-245,,,NA,NA,4,4/12/17,0,2,2,0,2,2,1,1,,
18859,CC015,"45,46x47",0,1,0,11/18/17,11/18/17,12/9/16,4/8/17,4,-224,-224,,,NA,NA,2,5/4/17,1,1,0,0,2,0,1,1,,
18859,CC015,"45,46x47",0,1,0,11/18/17,11/18/17,12/9/16,4/29/17,5,-203,-203,,,NA,NA,3,5/25/17,0,3,0,0,3,0,1,1,,
18859,CC015,"45,46x47",0,1,0,11/18/17,11/18/17,12/9/16,6/6/17,6,-165,-165,,,NA,NA,4,6/29/17,2,2,0,0,4,0,1,1,,
18859,CC015,"45,46x47",0,1,0,11/18/17,11/18/17,12/9/16,6/28/17,7,-143,-143,,,NA,NA,1,NA,0,0,1,0,0,1,1,0,,
18859,CC015,48x49,1,0,0,11/12/16,11/12/16,12/9/16,NA,1,NA,NA,,,NA,NA,0,NA,0,0,,,0,0,1,0,nonproductive,
18859,CC015,50x51,1,0,0,11/22/16,11/22/16,12/15/16,1/30/17,1,69,69,,,69,NA,4,2/23/17,2,1,NA,NA,3,1,1,1,,
18859,CC015,50x51,1,0,0,11/22/16,11/22/16,12/15/16,2/21/17,2,91,91,,,NA,22,3,3/15/17,0,3,0,0,3,0,1,1,,
18859,CC015,50x51,1,0,0,11/22/16,11/22/16,12/15/16,3/13/17,3,111,111,,,NA,20,6,4/5/17,1,3,2,0,4,2,1,1,,
18859,CC015,50x51,1,0,0,11/22/16,11/22/16,12/15/16,5/16/17,4,175,175,,,NA,64,3,6/8/17,1,2,0,0,3,0,1,1,,
18859,CC015,50x51,1,0,0,11/22/16,11/22/16,12/15/16,6/8/17,5,198,198,,,NA,23,NA,NA,NA,NA,NA,NA,NA,NA,1,0,,
18859,CC015,52x53,1,0,0,12/6/16,12/6/16,1/11/17,NA,1,NA,NA,,,NA,NA,0,NA,0,0,,,0,0,1,0,nonproductive,
18859,CC015,54x55,1,0,0,12/6/16,12/6/16,1/11/17,2/27/17,1,83,83,,,83,NA,5,3/23/17,4,1,0,,5,0,1,1,,
18859,CC015,54x55,1,0,0,12/6/16,12/6/16,1/11/17,5/10/17,2,155,155,,,NA,72,2,6/1/17,0,2,0,,2,0,1,1,,
18859,CC015,54x55,1,0,0,12/6/16,12/6/16,1/11/17,6/3/17,3,179,179,,,NA,24,4,6/29/17,4,0,0,,4,0,1,1,,
18859,CC015,56x57,1,0,0,12/18/16,12/18/16,1/11/17,3/22/17,1,94,94,,,94,NA,6,4/12/17,2,4,0,,6,0,1,1,,
18859,CC015,56x57,1,0,0,12/18/16,12/18/16,1/11/17,5/7/17,2,140,140,,,NA,46,1,6/1/17,0,1,0,,1,0,1,1,,
18859,CC015,56x57,1,0,0,12/18/16,12/18/16,1/11/17,6/18/17,3,182,182,,,NA,42,1,NA,0,0,1,missing,0,1,1,0,missing,
18859,CC015,56x57,1,0,0,12/18/16,12/18/16,1/11/17,7/15/17,4,209,209,,,NA,27,2,NA,0,0,2,1 FD: 56 FD 9/14/17,0,2,1,0,1 FD: 56 FD 9/14/17,
18859,CC015,"58,59,60x61",0,0,1,12/28/16,12/28/16,1/18/17,3/11/17,1,73,73,,,73,NA,4,4/5/17,2,1,1,1 missing,3,1,1,1,1 missing,
18859,CC015,"58,59,60x61",0,0,1,12/28/16,12/28/16,1/18/17,4/26/17,2,119,119,,,NA,NA,5,5/17/17,2,1,2,1 FD; 1 runt,3,2,1,1,1 FD; 1 runt,
18859,CC015,"58,59,60x61",0,0,1,12/28/16,12/28/16,1/18/17,5/18/17,3,141,141,,,NA,NA,4,6/8/17,2,2,0,,4,0,1,1,,
18859,CC015,"58,59,60x61",0,0,1,12/28/16,12/28/16,1/18/17,6/10/17,4,164,164,,,NA,NA,2,NA,0,0,2,runts,0,2,1,0,runts,
18859,CC015,"58,59,60x61",0,0,1,12/28/16,12/28/16,1/18/17,7/2/17,5,186,186,,,NA,NA,2,NA,0,0,2,missing,0,2,1,0,missing,
18859,CC015,"62,63x64",0,1,0,1/22/17,1/22/17,2/16/17,3/27/17,1,64,64,,,64,NA,1,NA,0,0,1,missing,0,1,1,0,missing,
18859,CC015,"62,63x64",0,1,0,1/22/17,1/22/17,2/16/17,4/3/17,2,71,71,,,NA,NA,1,NA,0,0,1,missing,0,1,1,0,missing,
18859,CC015,"62,63x64",0,1,0,1/22/17,1/22/17,2/16/17,4/18/17,3,86,86,,,NA,NA,3,NA,0,0,3,missing,0,3,1,0,missing,
18859,CC015,"62,63x64",0,1,0,1/22/17,1/22/17,2/16/17,4/24/17,4,92,92,,,NA,NA,1,NA,0,0,1,missing,0,1,1,0,missing,
18859,CC015,"62,63x64",0,1,0,1/22/17,1/22/17,2/16/17,5/21/17,5,119,119,,,NA,NA,6,6/16/17,2,3,1,1 runt,5,1,1,1,1 runt,
18859,CC015,"62,63x64",0,1,0,1/22/17,1/22/17,2/16/17,6/10/17,6,139,139,6/14/17,,NA,NA,4,7/6/17,3,1,0,,4,0,2,2,,
18859,CC015,"62,63x64",0,1,0,1/22/17,1/22/17,2/16/17,7/14/17,7,173,173,,,NA,NA,1,NA,0,0,1,1 missing,0,1,1,0,1 missing,
18859,CC015,"62,63x64",0,1,0,1/22/17,1/22/17,2/16/17,7/31/17,8,190,190,,,NA,NA,4,8/29/17,1,1,2,2 missing,2,2,1,1,2 missing,
18859,CC015,"65,66x67",0,1,0,1/24/17,1/24/17,2/16/17,NA,1,NA,NA,,,NA,NA,0,NA,0,0,,,0,0,1,0,nonproductive,
18859,CC015,"68,69x70",0,1,0,1/30/17,1/30/17,2/23/17,NA,1,NA,NA,,,NA,NA,0,NA,0,0,0,,0,0,1,0,,
18859,CC015,"71,72x73",0,1,0,2/21/17,2/21/17,3/15/17,4/29/17,1,67,67,,,67,NA,5,5/25/17,0,5,,,5,0,1,1,1 sick female 5/25/17,
18859,CC015,"71,72x73",0,1,0,2/21/17,2/21/17,3/15/17,7/11/17,2,140,140,,,NA,NA,3,8/4/17,2,1,,,3,0,1,1,1 sick female 5/25/17,
18859,CC015,"71,72x73",0,1,0,2/21/17,2/21/17,3/15/17,8/4/17,3,164,164,,,NA,NA,3,8/24/17,3,0,,,3,0,1,1,1 sick female 5/25/17,
18859,CC015,"71,72x73",0,1,0,2/21/17,2/21/17,3/15/17,9/15/17,4,206,206,,,NA,NA,3,10/5/17,2,1,,,3,0,1,1,1 sick female 5/25/17,
18859,CC015,"74,75x76",0,1,0,2/27/17,2/27/17,3/23/17,NA,1,NA,NA,,,NA,NA,0,NA,0,0,0,,0,0,1,0,,
18859,CC015,"77,78x79",0,1,0,3/11/17,3/11/17,4/5/17,NA,1,NA,NA,,,NA,NA,0,NA,0,0,0,0,0,0,1,0,,
18859,CC015,80x81,1,0,0,3/13/17,3/13/17,4/5/17,6/7/17,1,86,86,,,86,NA,4,6/29/17,1,3,,,4,0,1,1,male with dermatitis,
18859,CC015,80x81,1,0,0,3/13/17,3/13/17,4/5/17,6/30/17,2,109,109,,,NA,23,7,8/4/17,3,4,,,7,0,1,1,male with dermatitis,
18859,CC015,80x81,1,0,0,3/13/17,3/13/17,4/5/17,9/14/17,3,185,185,,,NA,76,1,10/5/17,0,1,,,1,0,1,1,male with dermatitis,
18859,CC015,82x83,1,0,0,3/16/17,3/16/17,4/12/17,8/12/17,1,149,149,,,149,NA,2,9/8/17,0,0,,,0,2,1,0,male with dermatitis,
18859,CC015,82x83,1,0,0,3/16/17,3/16/17,4/12/17,9/3/17,2,171,171,,,NA,22,1,9/29/17,0,1,,,1,0,1,1,male with dermatitis,
18859,CC015,82x83,1,0,0,3/16/17,3/16/17,4/12/17,9/25/17,3,193,193,,,NA,22,4,10/20/17,1,2,,,3,1,1,1,male with dermatitis,
18859,CC015,"84,85x86",0,1,0,3/22/17,3/22/17,4/12/17,6/15/17,1,85,85,,,85,NA,5,7/6/17,1,4,,,5,0,1,1,,
18859,CC015,"84,85x86",0,1,0,3/22/17,3/22/17,4/12/17,7/10/17,2,110,110,,,NA,NA,4,8/4/17,1,2,,,3,1,1,1,,
18859,CC015,"84,85x86",0,1,0,3/22/17,3/22/17,4/12/17,8/3/17,3,134,134,,,NA,NA,4,9/2/17,1,3,,,4,0,1,1,,
18859,CC015,"84,85x86",0,1,0,3/22/17,3/22/17,4/12/17,9/9/17,4,171,171,,,NA,NA,2,10/5/17,0,2,,,2,0,1,1,,
18859,CC015,"84,85x86",0,1,0,3/22/17,3/22/17,4/12/17,9/23/17,5,185,185,,,NA,NA,2,10/20/17,1,1,,,2,0,1,1,,
18859,CC015,"84,85x86",0,1,0,3/22/17,3/22/17,4/12/17,10/1/17,6,193,193,,,NA,NA,2,10/26/17,2,0,,,2,0,1,1,,
18859,CC015,"84,85x86",0,1,0,3/22/17,3/22/17,4/12/17,11/18/17,7,241,241,,,NA,NA,1,NA,0,0,,,0,1,1,0,missing 11/21/18,
18859,CC015,87x88,1,0,0,4/1/17,4/1/17,4/26/17,7/17/17,1,107,107,,,107,NA,2,8/10/17,1,1,0,,2,0,1,1,,
18859,CC015,"89,90x91",0,1,0,4/26/17,4/26/17,5/17/17,7/16/17,1,81,81,,,81,NA,4,8/10/17,2,1,,,3,1,1,1,,
18859,CC015,"89,90x91",0,1,0,4/26/17,4/26/17,5/17/17,9/10/17,2,137,137,,,NA,NA,3,10/5/17,1,1,,,2,1,1,1,,
18859,CC015,"89,90x91",0,1,0,4/26/17,4/26/17,5/17/17,12/2/17,3,220,220,,,NA,NA,1,12/6/17,0,0,,,0,1,1,0,found dead,
18859,CC015,"89,90x91",0,1,0,4/26/17,4/26/17,5/17/17,12/13/17,4,231,231,,,NA,NA,4,12/21/17,0,0,,,0,4,1,0,"2 missing, 1 FD",
18859,CC015,"92,93x94",0,1,0,5/18/17,5/18/17,6/8/17,NA,1,NA,NA,,,NA,NA,0,NA,0,0,0,,0,0,1,0,,
18859,CC015,95x96,1,0,0,5/16/17,5/16/17,6/8/17,NA,1,NA,NA,,,NA,NA,0,NA,0,0,0,,0,0,1,0,,
18859,CC015,"97,98x99",0,1,0,6/6/17,6/6/17,6/29/17,9/10/17,1,96,96,,,96,NA,2,NA,0,0,,,0,2,1,0,runt,
18859,CC015,"97,98x99",0,1,0,6/6/17,6/6/17,6/29/17,10/3/17,2,119,119,,,NA,NA,2,10/26/17,1,0,,,1,1,1,1,,
18859,CC015,"97,98x99",0,1,0,6/6/17,6/6/17,6/29/17,10/21/17,3,137,137,,,NA,NA,5,11/14/17,1,4,,,5,0,1,1,,
18859,CC015,"97,98x99",0,1,0,6/6/17,6/6/17,6/29/17,10/30/17,4,146,146,,,NA,NA,1,11/21/17,1,0,,,1,0,1,1,,
18859,CC015,"97,98x99",0,1,0,6/6/17,6/6/17,6/29/17,12/11/17,5,188,188,,,NA,NA,1,NA,0,0,,,0,1,1,0,,
24684,CC016,"101,102x103",0,1,0,2/28/17,2/28/17,3/23/17,NA,1,NA,NA,,,NA,NA,0,NA,0,0,0,103 replaced with 97,0,0,1,0,103 replaced with 97,
24684,CC016,104x105,1,0,0,2/28/17,2/28/17,3/23/17,NA,1,NA,NA,,,NA,NA,0,NA,0,0,0,105 replaced with 97,0,0,1,0,105 replaced with 97,
24684,CC016,"106,107x108",0,1,0,3/31/17,3/31/17,4/20/17,NA,1,NA,NA,,,NA,NA,0,NA,0,0,0,,0,0,1,0,,
24684,CC016,"109,110x111",0,1,0,4/1/17,4/1/17,4/26/17,NA,1,NA,NA,,,NA,NA,0,NA,0,0,0,,0,0,1,0,,
24684,CC016,"112,113x114",0,1,0,4/9/17,4/9/17,5/5/17,NA,1,NA,NA,,,NA,NA,0,NA,0,0,0,,0,0,1,0,,
24684,CC016,"115,116x117",0,1,0,5/4/17,5/4/17,5/26/17,NA,1,NA,NA,,,NA,NA,0,NA,0,0,0,,0,0,1,0,,
24684,CC016,"118,119x120",0,1,0,5/7/17,5/7/17,6/2/17,NA,1,NA,NA,,,NA,NA,0,NA,0,0,,,0,0,1,0,,
24684,CC016,"121,122x123",0,1,0,5/7/17,5/7/17,6/2/17,7/21/17,1,75,75,7/26/17,,75,NA,10,8/21/17,3,6,1,,9,1,2,2,,
24684,CC016,"121,122x123",0,1,0,5/7/17,5/7/17,6/2/17,9/26/17,2,142,142,,,NA,NA,3,10/30/17,2,1,0,,3,0,1,1,,
24684,CC016,"121,122x123",0,1,0,5/7/17,5/7/17,6/2/17,11/17/17,3,194,194,,,NA,NA,1,NA,0,0,1,FD,0,1,1,0,FD,
24684,CC016,"121,122x123",0,1,0,5/7/17,5/7/17,6/2/17,2/3/18,4,272,272,,,NA,NA,6,3/7/18,1,2,3,3 missing; 121 ear infection 3/19/18,3,3,1,1,3 missing; 121 ear infection 3/19/18,
24684,CC016,"124,125x126",0,1,0,5/29/17,5/29/17,6/22/17,NA,1,NA,NA,,,NA,NA,0,NA,0,0,,,0,0,1,0,unproductive,
24684,CC016,"127,128x129",0,1,0,6/17/17,6/17/17,7/24/17,NA,1,NA,NA,,,NA,NA,0,NA,0,0,0,,0,0,1,0,,
24684,CC016,130x129,1,0,0,6/17/17,6/17/17,7/24/17,NA,1,NA,NA,,,NA,NA,0,NA,0,0,0,,0,0,1,0,,
24684,CC016,131x133,1,0,0,6/17/17,6/17/17,7/24/17,9/26/17,1,101,101,,,101,NA,1,NA,0,0,,,0,1,1,0,missing,
24684,CC016,131x133,1,0,0,6/17/17,6/17/17,7/24/17,10/30/17,2,135,135,,,NA,34,2,NA,0,0,,,0,2,1,0,born dead,
24684,CC016,132x133,1,0,0,6/17/17,6/17/17,7/24/17,11/1/17,1,137,137,,,137,NA,6,12/6/17,4,2,,,6,0,1,1,,
24684,CC016,134x136,1,0,0,6/17/17,6/17/17,7/24/17,9/11/17,1,86,86,,,86,NA,6,10/8/17,2,1,,,3,3,1,1,,
24684,CC016,135x136,1,0,0,6/17/17,6/17/17,7/24/17,9/4/17,1,79,79,,,79,NA,9,10/3/17,2,7,,,9,0,1,1,,
24684,CC016,135x136,1,0,0,6/17/17,6/17/17,7/24/17,10/25/17,2,130,130,,,NA,51,6,11/14/17,2,4,,,6,0,1,1,,
24684,CC016,135x136,1,0,0,6/17/17,6/17/17,7/24/17,12/6/17,3,172,172,,,NA,42,4,1/4/18,3,1,,,4,0,1,1,,
24684,CC016,137x138,1,0,0,7/6/17,7/6/17,7/31/17,NA,1,NA,NA,,,NA,NA,0,NA,0,0,0,,0,0,1,0,,
24684,CC016,139x140,1,0,0,7/4/17,7/4/17,7/31/17,NA,1,NA,NA,,,NA,NA,0,NA,0,0,0,,0,0,1,0,,
24684,CC016,"141,142x143",0,1,0,7/4/17,7/4/17,7/31/17,NA,1,NA,NA,,,NA,NA,0,NA,0,0,0,,0,0,1,0,,
24684,CC016,144x145,1,0,0,7/10/17,7/10/17,8/15/17,9/26/17,1,78,78,,,78,NA,2,10/30/17,1,1,0,,2,0,1,1,,
24684,CC016,144x145,1,0,0,7/10/17,7/10/17,8/15/17,11/3/17,2,116,116,,,NA,38,5,11/21/17,4,1,0,,5,0,1,1,,
24684,CC016,144x145,1,0,0,7/10/17,7/10/17,8/15/17,11/26/17,3,139,139,,,NA,23,5,12/19/17,2,3,0,,5,0,1,1,,
24684,CC016,144x145,1,0,0,7/10/17,7/10/17,8/15/17,12/19/17,4,162,162,,,NA,23,4,1/18/18,2,2,0,,4,0,1,1,,
24684,CC016,"146,147x148",0,1,0,7/25/17,7/25/17,9/11/17,10/21/17,1,88,88,,,88,NA,4,11/14/17,2,0,,,2,2,1,1,,
24684,CC016,"146,147x148",0,1,0,7/25/17,7/25/17,9/11/17,11/5/17,2,103,103,11/8/17,,NA,NA,6,12/6/17,3,3,,,6,0,2,2,,
24684,CC016,"146,147x148",0,1,0,7/25/17,7/25/17,9/11/17,12/23/17,3,151,151,,,NA,NA,3,1/24/18,1,2,,,3,0,1,1,,
24684,CC016,"146,147x148",0,1,0,7/25/17,7/25/17,9/11/17,12/31/17,4,159,159,,,NA,NA,2,1/24/18,0,2,,,2,0,1,1,,
24684,CC016,"146,147x148",0,1,0,7/25/17,7/25/17,9/11/17,1/14/18,5,173,173,,,NA,NA,1,2/14/18,0,1,,,1,0,1,1,,
24684,CC016,"146,147x148",0,1,0,7/25/17,7/25/17,9/11/17,1/23/18,6,182,182,,,NA,NA,5,2/18/18,3,2,,,5,0,1,1,,
24684,CC016,"146,147x148",0,1,0,7/25/17,7/25/17,9/11/17,2/27/18,7,217,217,,,NA,NA,3,3/28/18,2,1,,,3,0,1,1,,
24684,CC016,"146,147x148",0,1,0,7/25/17,7/25/17,9/11/17,4/13/18,8,262,262,,,NA,NA,3,5/8/18,0,3,,,3,0,1,1,,
24684,CC016,146x147,1,0,0,7/10/17,7/10/17,8/15/17,9/19/17,1,71,71,,,71,NA,3,NA,0,0,3,missing,0,3,1,0,missing,
24684,CC016,149x150,1,0,0,7/25/17,7/25/17,9/11/17,10/3/17,1,70,70,,,70,NA,2,10/30/17,0,2,,,2,0,1,1,,
24684,CC016,149x150,1,0,0,7/25/17,7/25/17,9/11/17,10/23/17,2,90,90,,,NA,20,5,11/14/17,4,1,,,5,0,1,1,,
24684,CC016,149x150,1,0,0,7/25/17,7/25/17,9/11/17,11/14/17,3,112,112,,,NA,22,6,12/19/17,3,3,,,6,0,1,1,,
24684,CC016,149x150,1,0,0,7/25/17,7/25/17,9/11/17,1/3/18,4,162,162,,,NA,50,4,2/2/18,2,2,,,4,0,1,1,,
24684,CC016,149x150,1,0,0,7/25/17,7/25/17,9/11/17,1/27/18,5,186,186,,,NA,24,3,3/2/18,2,1,,,3,0,1,1,,
24684,CC016,149x150,1,0,0,7/25/17,7/25/17,9/11/17,2/18/18,6,208,208,,,NA,22,4,3/20/18,2,2,,,4,0,1,1,,
24684,CC016,150x151,1,0,0,7/27/17,7/27/17,9/11/17,10/8/17,1,73,73,,,73,NA,4,11/8/17,2,2,0,,4,0,1,1,,
24684,CC016,150x151,1,0,0,7/27/17,7/27/17,9/11/17,10/30/17,2,95,95,,,NA,22,4,11/21/17,4,0,0,,4,0,1,1,,
24684,CC016,150x151,1,0,0,7/27/17,7/27/17,9/11/17,12/8/17,3,134,134,,,NA,39,7,1/4/18,3,4,0,,7,0,1,1,,
24684,CC016,150x151,1,0,0,7/27/17,7/27/17,9/11/17,1/3/18,4,160,160,,,NA,26,4,2/2/18,3,1,0,,4,0,1,1,,
24684,CC016,150x151,1,0,0,7/27/17,7/27/17,9/11/17,1/26/18,5,183,183,,,NA,23,4,2/28/18,0,4,0,,4,0,1,1,,
24684,CC016,150x151,1,0,0,7/27/17,7/27/17,9/11/17,2/17/18,6,205,205,,,NA,22,4,NA,0,0,4,1 BD; missing,0,4,1,0,1 BD; missing,
24684,CC016,150x151,1,0,0,7/27/17,7/27/17,9/11/17,3/17/18,7,233,233,,,NA,28,5,4/17/18,1,4,0,,5,0,1,1,,
24684,CC016,150x151,1,0,0,7/27/17,7/27/17,9/11/17,4/8/18,8,255,255,,,NA,22,2,5/15/18,0,2,0,,2,0,1,1,,
24684,CC016,150x151,1,0,0,7/27/17,7/27/17,9/11/17,5/3/18,9,280,280,,,NA,25,2,5/30/18,1,1,0,,2,0,1,1,,
24684,CC016,"152,153x154",0,1,0,7/28/17,7/28/17,9/11/17,NA,1,NA,NA,,,NA,NA,0,NA,0,0,,,0,0,1,0,,
24684,CC016,"155,156x157",0,1,0,9/11/17,9/11/17,10/23/17,11/30/17,1,80,80,,,80,NA,7,12/19/17,4,2,,,6,1,1,1,1 missing,
24684,CC016,"155,156x157",0,1,0,9/11/17,9/11/17,10/23/17,1/21/18,2,132,132,,,NA,NA,1,NA,0,0,,,0,1,1,0,found dead,
[truncated: 1,101,124 more chars]
